# Supplementary material for: Comparative Leaves Transcriptome Analysis Emphasizing on Accumulation of Anthocyanins in Brassica: Molecular Regulation and Potential Interaction with Photosynthesis
Source: Front Plant Sci. 2016 Mar 18;7:311. doi: 10.3389/fpls.2016.00311 (PMC4796009; doi:10.3389/fpls.2016.00311)
Supplement: Supplementary Data Sheet S1 — Expression value of each gene identified in different samples in different Brassica species. [file DataSheet1.XLSX]

## Sheet: Expression value of each gene
Datasheet S1: Expression value of each gene identified in different samples of different Brassica species
	B. napus				B. juncea				B. carinata				B. rapa						B. oleracea
	BnaP		BnaG		BjuP		BjuG		BcaP		BcaG		BraP1		BraP2		BraG		BolP		BolG
Gene ID	Sample1	Sample2	Sample1	Sample2	Sample1	Sample2	Sample1	Sample2	Sample1	Sample2	Sample1	Sample2	Sample1	Sample2	Sample1	Sample2	Sample1	Sample2	Sample1	Sample2	Sample1	Sample2
BnaA01g00010D	38.0069	67.1862	73.954	49.3804	83.9088	75.6724	87.6793	66.6487	28.5482	18.6246	0	0	21.8233	29.2202	2.76994	0	19.3061	37.3315	117.007	89.3683	0	0
BnaA01g00020D	6.39105	10.6146	1.87334	0.527409	17.5385	13.2896	17.7298	13.4065	0	0	0	0	10.4206	1.55358	21.2086	12.9632	6.03871	3.27502	0	0	0	0
BnaA01g00030D	3.66734	2.3172	8.10982	4.51732	13.448	13.1257	7.77652	9.1366	0	0.37843	0.239853	0	5.99975	4.54816	12.5722	3.75433	3.41052	5.56507	0.0649409	0.525928	0.0755965	0
BnaA01g00040D	0	0	0	0	0	0	0	0	0	0	0	0	0	0	0	0	0	0	0	0	0	0
BnaA01g00050D	62.2508	65.0076	38.6274	31.0703	78.4441	81.8022	72.8997	66.9769	1.9444	1.74862	0.487493	0.668997	84.414	74.2105	71.7807	40.4139	52.7741	46.8975	3.35042	5.41088	2.24857	3.30624
BnaA01g00060D	0.660159	1.80043	0.165472	0.379573	0	1.83214	0.526947	0.818723	0	0	0	0	0.493653	0.407163	1.36112	0.337767	1.30577	0.328943	0	0	0	0
BnaA01g00070D	0	0	0	0	0	0	0	0	0	0	0	0	0	0	0	0	0	0	0	0	0	0
BnaA01g00080D	0	3.63666	1.17354	1.21968	5.11935	3.53057	0.808356	3.37168	0	0	0	0	1.55456	0.680258	2.96791	1.65816	1.22337	1.66692	0	0	0	0
BnaA01g00090D	0	0.271768	0.0674108	0.228019	0.14392	0	0.111047	0.114414	0	0.215751	0	0.260925	0.432879	0.0873397	0	0.0729462	0.484681	0.0706887	0.118915	0.276493	0	0.131886
BnaA01g00100D	7.29257	5.49852	7.47756	8.88726	5.28395	5.72004	5.51575	4.79404	0	0	0	0	14.7393	19.2818	4.87751	2.46085	11.4953	10.0703	1.7181	1.62398	0.989136	1.29992
BnaA01g00110D	0	0	0	0	0	0	0	0	0	0	0	0	0	0	0	0	0	0	0	0	0	0
BnaA01g00120D	2.60703	2.60135	11.4953	10.7434	1.15236	0.767444	1.9602	1.16026	0	0	0	0	6.95089	16.2391	6.67021	4.67959	5.36196	7.68174	0.136419	0	0.159413	0
BnaA01g00130D	0.729335	0.280703	0.295106	0	0.667049	0.651075	0.421394	0.438166	0	0	0	0	0	0	0.286415	0	0	0	0.418538	0.244236	0	0.238589
BnaA01g00140D	0.389455	0.644899	1.59681	1.46946	1.42235	0.284585	0.421841	0	0	0	0	0.175421	0.948659	1.68982	1.39008	0.412035	0.14903	2.02074	0	0.140468	0	0
BnaA01g00150D	0.125911	0.381794	0.393986	0	0	0	0	0	0	0	0	0.162574	0.132607	0.166797	0	0.135572	0.145929	0.132797	0.230682	0	0	0
BnaA01g00160D	0	0	0	0	0	0	0	0	0	0	0	0	0	0	0	0	0	0	0	0	0	0
BnaA01g00170D	186.517	309.091	272.033	289.667	252.721	224.561	398.49	376.391	43.4283	43.1278	143.994	47.3747	343.966	433.066	401.974	199.209	1198.95	602.122	15.9335	31.1088	136.865	113.606
BnaA01g00180D	17.5072	14.1493	26.3365	13.5938	5.40737	4.43913	6.54099	7.75287	3.20108	1.46313	0.843714	2.4108	28.4387	47.1098	43.1797	26.2393	17.598	52.1953	1.22262	1.23096	2.9164	3.02914
BnaA01g00190D	11.4363	4.60608	18.9402	14.4487	28.3093	32.2562	30.1397	31.4151	9.04493	9.69138	3.1849	15.8677	28.3095	47.5791	33.0044	28.7318	19.8779	29.0276	0.232173	0.323806	0.216757	0.35473
BnaA01g00200D	7.11593	7.14746	7.24796	5.14775	13.2626	14.1009	10.1989	12.1771	0	0.196829	0	0	19.2665	16.1468	17.3637	13.1402	20.9999	16.5993	0.501291	0.584401	0.235575	0.768648
BnaA01g00210D	12.494	10.2349	16.2673	17.0791	37.5234	36.3213	66.3071	62.6438	0.104404	0.90452	0.289545	0.174488	60.3182	85.5569	38.8745	31.0125	71.6209	55.9633	0.273144	0.444178	0	0.119483
BnaA01g00220D	0	0	0	0	0	0	0	0	0	0	0	0	0	0	0	0	0	0	0	0	0	0
BnaA01g00230D	0	0	0	0	0	0	0	0	0	0	0	0	0	0	0	0	0	0	0	0	0	0
BnaA01g00240D	0	0	0	0	0	0	0	0	0	0	0	0	0	0	0	0	0	0	0	0	0	0
BnaA01g00250D	0.518145	0	0	0	3.75177	4.87868	3.45103	0	0	0	0	0	0.532851	0.752025	1.20278	0	0	0	0	0	0	0
BnaA01g00260D	8.74562	2.33322	4.42414	0	0	0	0	0	0	0	0	0	0	0	0	0	0	0	0	0	0	0
BnaA01g00270D	0.310695	0.545067	0	0	0.486788	0.239263	0	0	0	0	0	0	0.333474	1.81914	0	0.110455	0.117419	0	0	0	0	0
BnaA01g00280D	8.62919	9.09835	25.4809	21.9502	19.5656	20.0381	37.798	31.0309	0.310128	0.605837	0.954695	0.371686	52.6734	41.8865	43.3005	26.7886	41.4945	35.1796	0	0	0	0
BnaA01g00290D	1.93947	0.922702	2.16036	1.92786	4.30127	4.61111	2.53972	2.573	0.839603	0.632332	0.234256	1.27751	5.3273	5.67208	5.33	2.3403	1.15827	3.421	0	0.0700201	0	0
BnaA01g00300D	8.98477	3.93462	7.0409	7.37569	11.4667	11.8749	13.5459	10.9909	0.678823	1.18599	0.156247	2.27137	26.456	29.941	18.7085	9.80201	5.87059	29.0559	0	0	0	0
BnaA01g00310D	0	0.378846	0.970969	0.670909	0.438718	0.418343	0.910922	0.924741	0	0	0	0	1.14695	0.450836	1.05238	0.736272	0.79803	0.871078	0	0	0	0
BnaA01g00320D	3.00586	1.69393	20.4888	13.858	16.4605	14.028	31.1579	22.3833	7.9577	6.85959	8.94664	3.94025	61.8779	42.6781	29.1627	15.4369	51.1545	40.3745	0.604506	0.524953	0.523059	1.04139
BnaA01g00330D	0	0	0	0	0	0	0	0	0	0	0	0	0	0	0	0	0	0	0	0	0	0
BnaA01g00340D	2.79982	2.55669	4.69851	3.6653	11.6489	11.4064	5.39959	4.24499	0.113617	0.107342	0	0.257058	9.90602	13.4077	11.0459	4.66629	7.32251	14.2718	0	0.201233	0.333325	0.566131
BnaA01g00350D	0	0	0	0	0	0	0	0	0	0	0	0	0	0	0	0	0	0	0	0	0	0
BnaA01g00360D	0	0.121838	0.124168	0	0	0	0	0	0	0	0	0	0	0.307747	0	0	0	0	0	0.123758	0.246265	0.233155
BnaA01g00370D	0	0.142162	0.142866	0.4965	0.324491	0.32475	0	0.24162	0.235835	0	0	0	0.141541	0.716468	0.344573	0.151175	0.483839	0.585216	0	0	0	0
BnaA01g00380D	17.6414	19.2986	10.2978	12.0035	22.4139	17.5763	20.5416	20.1479	0	0.13436	0.196883	0.192827	21.8731	29.5619	42.8849	23.8077	35.5639	21.5877	0	0	0.0891041	0
BnaA01g00390D	12.9354	20.1461	20.4065	15.4005	35.9191	34.524	37.9213	30.6323	0.610298	1.02622	1.83952	0.773411	47.6341	43.7991	30.627	16.162	39.8761	37.2637	0	1.27902	1.84362	2.12759
BnaA01g00400D	0	0	0.551852	0	1.30202	1.9288	0.87477	2.25312	0	0	0	0	1.31911	0.991024	0.638987	1.35871	0	0	0	0	0	0
BnaA01g00410D	2.74294	3.29083	2.41933	1.45667	3.6546	3.5158	0.950489	1.23231	0	0	0	0	8.50081	8.8308	6.023	3.9132	1.41238	1.92972	0	0	0	0
BnaA01g00420D	20.4153	11.325	61.1916	40.4711	81.1146	89.6115	86.354	87.4354	0	0.526802	1.60987	5.05373	68.1183	97.2354	76.6617	51.6015	25.938	92.6422	0.470895	0.392169	0.79113	1.1233
BnaA01g00430D	6.5243	4.15112	7.87515	4.22875	15.8675	14.7148	16.677	12.4614	0.159878	0	0	0	12.0846	17.5486	7.8439	4.53655	2.77376	9.62831	2.27272	2.43535	1.51815	2.11456
BnaA01g00440D	2.84906	2.51435	6.05505	3.48223	5.81439	7.53755	7.57768	7.21318	2.24046	1.96555	2.53195	2.85181	5.99251	6.94938	5.47769	3.30095	5.93652	5.80247	0.0340348	0.0788815	0	0
BnaA01g00450D	23.3853	10.414	52.9848	40.6118	195.692	157.559	65.6956	68.2199	0	0	0	0	93.8435	88.5555	87.2611	65.7145	11.1829	53.5211	0	0	0	0
BnaA01g00460D	27.111	23.4467	2.514	2.64368	38.37	37.3695	246.672	218.773	6.46433	7.69532	5.99583	3.1926	59.1117	61.239	63.8812	39.8637	74.6355	67.3225	0.22805	0.799817	5.77742	6.15957
BnaA01g00470D	0.530343	0.340384	0	0	0	0	0	0	0	0	0	0	0.600474	0	0	0	0	0	0	0	0	0
BnaA01g00480D	40.5479	49.6077	0.49957	0.385737	92.075	97.1961	73.828	60.4991	16.1902	12.5797	20.1976	12.3161	70.1556	86.996	78.3287	47.6317	101.099	95.3345	1.09216	4.15955	6.26667	6.21382
BnaA01g00490D	0	0	0	0	0	0	0	0	0	0	0	0	0	0	0	0	0.568526	0	0	0	0	0
BnaA01g00500D	1.60881	3.19578	2.29375	1.34284	2.56623	2.62531	0.940061	1.06609	0.137661	0.418453	0.949842	0.266353	2.98149	3.33765	1.46305	0.756055	2.04795	0.778412	0	0	0	0
BnaA01g00510D	0	0.108645	0.215484	0	0	0	0.173136	0	0	0	0	0	0.106628	0.764533	0	0	0.113323	0.101967	0	0	0	0
BnaA01g00520D	0	0	0	0	0	0	0	0	0	0	0	0	0	0	0	0	0.104556	0	0	0	0	0
BnaA01g00530D	0	0	0	0	0	0	0	0	0	0	0	0	0	0	0	0	0	0	0	0	0	0
BnaA01g00540D	0	0	0	0	0	0	0	0	0	0	0	0	0	0	0	0	0	0	0	0	0	0
BnaA01g00550D	0	0	0	0	0	0	0	0	0	0	0	0	0	0	0	0	0	0	0	0	0	0
BnaA01g00560D	0	0	0	0	0	0	0	0	0	0	0	0	0	0	0	0	0	0	0	0	0	0
BnaA01g00570D	0	0	0	0.228676	0	0	0	0	0	0.151089	0	0	0.0998461	0.117515	0	0.100746	1.35655	0	0	0	0	0
BnaA01g00580D	0	0	0.40812	0	1.08826	0.726002	1.18309	1.23904	0	0	0	0	0.165112	0.197111	0.189381	0.164648	0	0.0781511	0	0	0	0
BnaA01g00590D	6.02924	8.12857	9.92231	8.6781	23.9213	16.6317	16.8524	9.9287	5.86478	6.19056	8.34021	9.08677	10.0406	13.4517	3.06045	6.94011	6.30237	7.3884	2.10301	2.59531	5.79247	5.42389
BnaA01g00600D	1.29263	4.5158	3.67945	3.9114	2.62001	3.9619	1.65474	1.53637	0.420134	0	0.104783	0	0.365932	0.215165	0.943938	0.830205	18.2793	1.48921	0	0	0	0
BnaA01g00610D	27.6757	38.8664	77.1499	56.5059	195.467	154.043	158.006	185.927	60.3558	56.8269	19.019	69.1723	162.786	122.174	204.138	145.019	252.361	287.609	2.92074	6.21112	1.91114	2.612
BnaA01g00620D	0	0	0.154302	0	0	0	0	0	0	0	0	0	0	0	0	0	0	0	0	0	0	0
BnaA01g00630D	0	0	0	0	0	0	0	0	0	0	0	0	0	0	0	0	0	0	0	0	0	0
BnaA01g00640D	0	0	0	0	0	0	0	0	0	0	0	0	0	0	0	0	0	0	0	0	0	0
BnaA01g00650D	7.93649	5.66818	18.5477	13.605	22.3335	22.6984	14.0965	16.4881	9.82779	7.78981	4.04693	10.7259	12.8209	15.9532	13.7016	6.30428	14.0992	9.97636	4.68419	5.72864	2.30405	3.95843
BnaA01g00660D	5.72046	4.59103	9.03828	9.29468	12.1545	9.72119	15.9163	12.2056	0.571369	0.808376	0.794342	1.03116	19.5876	25.2874	14.6317	9.27691	51.3788	31.41	0	0	0	0
BnaA01g00670D	9.0079	7.17429	3.72739	2.67403	21.0385	15.7903	7.43581	7.70279	2.31473	0.984282	2.23661	2.37868	6.49496	5.17197	6.1953	2.18633	4.49007	2.89356	1.61756	1.42462	0	0
BnaA01g00680D	0.468526	0.464305	3.1458	2.71411	0.590344	0.151417	0.323622	0.226192	0	0.101092	0	0	0.789514	0.46741	0.467085	0.465156	0.346204	0.621007	0.0524582	0	0	0
BnaA01g00690D	0.21219	0	0	0.130435	0	0	0.174784	0.178181	0.687295	0.173573	0.148106	0.27519	0	0.134874	0	0	0	0	0	0	0	0
BnaA01g00700D	1.26602	1.23303	0.394218	0.565564	2.59484	1.78019	3.06939	1.03048	0	0	0	0	2.35656	0.568274	2.72005	1.45194	1.91306	2.01482	0.141169	0.0815332	0	0
BnaA01g00710D	0.293163	0.275952	0.2995	0	3.39261	0.655146	0	2.35707	0	0	0	0	0.547696	0	0.320455	0.287539	0.308886	0.853371	0	0	0	0
BnaA01g00720D	0	0	0	0	0	0	0	0	0	0	0	0	0	0	0	0	0	0	0	0	0	0
BnaA01g00730D	0.730982	0.912196	0	0	0	0	0	0	0	0	0	0	0.158111	0	0.883	0.6298	1.71743	0.301163	0	0	0.148792	0
BnaA01g00740D	0.321104	0.388665	0	0	0	0	0.70365	0	0	0	0	0	0.721212	0	0	0	0	0	0	0	0	0
BnaA01g00750D	0	0	0	1.33248	0	0	0	0	0	0	0	0	0	0	0	0	0	0	0	0	0	0
BnaA01g00760D	3.1174	5.07648	5.42913	4.60981	20.9785	20.1593	11.8829	12.606	0	0.164742	0	0	11.7054	10.9326	8.92027	5.79178	19.0626	23.3741	0	0	0	0
BnaA01g00770D	11.0903	18.9667	16.9973	16.0325	40.6539	35.0879	21.659	23.1688	0	0	0	0	18.1024	21.8029	12.0504	6.3299	10.3626	7.76529	0	0	0	0
BnaA01g00780D	22.2611	25.6328	27.1754	16.436	79.2862	57.2499	3.82351	6.16985	2.03578	3.07302	3.47366	0.618829	60.061	53.747	41.9516	24.9341	65.0249	67.3238	0.524626	1.2329	2.04225	2.01891
BnaA01g00790D	0	0.275335	0	0	0	0	0	0	0	0	0	0	0	0	0	0	0	0	1.02403	0	0	0
BnaA01g00800D	14.5541	11.1887	13.6477	12.4029	0	0	0.213324	0	0	0	0.168374	0.162046	16.2362	16.5543	18.8392	9.19561	35.8978	27.0464	0	0.134699	0.132601	0.127621
BnaA01g00810D	0	0	0	0	0	0	0	0	0	0	0	0	0	0	0	0	0	0	0	0	0	0
BnaA01g00820D	0	0	0	0	0	0	0	0	0	0	0	0	0	0	0	0	0	0	0	0	0	0
BnaA01g00830D	0	0	0	0	0	0	0	0	0	0	0	0	0	0	0	0	0	0	0	0	0	0
BnaA01g00840D	0	0	0	0	0	0	0	0	0	0	0	0	0	0	0	0	0	0	0	0	0	0
BnaA01g00850D	5.10177	11.8429	4.72674	3.30523	11.5069	10.2852	4.23091	2.08982	0.443649	1.11438	1.06571	0.917628	5.53753	6.73665	6.72103	3.917	9.1256	4.63946	1.28052	1.26038	0.967264	1.75598
BnaA01g00860D	1.61363	0.7146	3.26942	4.45621	0	1.60405	2.36635	3.14827	0	0.352629	0.49173	0.51014	2.58086	3.95074	3.20178	1.60042	2.40883	5.79129	2.06186	3.4314	11.9429	12.8417
BnaA01g00870D	0.930328	1.20734	1.35228	0.760931	1.53186	0.633663	0.700099	1.20983	0	0	0.0801491	0	2.16436	2.38146	1.20687	1.2376	1.39309	2.73496	0.0553897	0.515024	0.0648401	0.0597496
BnaA01g00880D	4.0678	3.21949	4.36927	3.5111	6.06488	8.8145	6.12761	7.44589	0.716252	0.348124	0.438936	1.10034	6.07149	11.7585	7.10917	2.98707	10.8523	15.2046	1.43024	0.770563	0.438822	0.308911
BnaA01g00890D	6.38512	1.64615	3.2269	2.20141	7.55379	11.9094	7.97173	8.14532	3.75538	3.37894	0.764508	2.19141	11.8367	15.6742	14.594	7.28153	4.2675	6.07405	4.67312	5.81308	0.0950027	0.274143
BnaA01g00900D	4.31612	7.38047	2.15557	0.707251	1.90714	0.904247	0.960829	1.32574	0.332214	0.32047	0	0.252665	30.2068	2.97674	11.6081	7.01485	2.45166	7.71482	7.479	1.97765	0.394141	0.573895
BnaA01g00910D	0	0	0	0	0	0	0	0	0	0	0	0	0	0	0	0	0	0	0	0	0	0
BnaA01g00920D	4.86	1.21196	1.01025	0.420589	5.772	3.53726	1.76289	0.597267	0	0.199876	0	0	6.47424	9.42285	19.6541	13.9781	1.16023	11.9862	0	0	0.3995	0.125322
BnaA01g00930D	19.111	20.7505	18.3059	14.7116	71.7381	62.313	76.326	83.4837	0	0.988335	0.560364	0	123.578	69.1865	214.897	120.393	99.9479	58.0397	0	0	0.198533	0
BnaA01g00940D	1.22411	1.41828	4.09658	2.40167	7.45872	6.8321	7.58615	4.94397	0.329951	0.331504	0.394528	0.384783	7.57803	8.61433	6.03559	2.36177	1.59224	3.18738	0	0.417886	0.519884	0.196608
BnaA01g00950D	0	0	0	0	0	0	0	0	0	0	0	0	0	0	0	0	0	0	0	0	0	0
BnaA01g00960D	3.69595	5.58529	2.51218	0.46727	7.80149	4.6563	1.85916	6.40735	0	0	0	0	4.15952	0.967576	4.8442	1.99299	0.425451	1.54324	0	0	0	0
BnaA01g00970D	4.90731	1.57619	4.0408	3.90046	6.44053	10.8931	9.44525	8.91298	3.23876	0.726052	1.76536	1.92391	8.90199	7.74292	9.89108	6.19124	7.26978	13.9915	2.45159	0.79619	0.340126	0.218412
BnaA01g00980D	5.71764	8.83414	5.34542	4.8596	9.77359	10.2585	4.71951	4.9255	0.101835	0	0.262433	0.242382	7.92562	8.14479	13.1454	6.96524	7.89478	8.00319	0.173856	0.0676887	0	0.0641369
BnaA01g00990D	1.47044	1.28613	0.986246	1.15422	1.97289	2.23853	1.45724	1.45569	1.4139	0.654977	1.39527	0.762383	1.86179	2.53627	1.47648	0.698893	1.89052	1.44145	3.16482	1.24011	1.98639	2.71818
BnaA01g01000D	0.115851	0.123312	9.04557	0.139338	37.4135	9.62562	26.0439	10.8325	66.8737	54.5426	1.59711	6.36882	47.1581	24.3777	0.8339	0	0.403266	18.7637	0.772902	1.15304	2.83063	4.16291
BnaA01g01010D	0	0	0	0	0.288303	0	0	0	0.227883	0	0	0.187229	0	0	0	0	0	0.140221	0	0	0	0
BnaA01g01020D	23.6766	33.2595	31.7143	30.0211	49.404	50.4896	43.4142	41.4514	2.00942	2.91822	3.22582	0.800624	59.6549	55.4154	74.9299	38.4838	63.5942	82.6678	0	0	12.6737	15.1017
BnaA01g01030D	2.21567	1.74273	1.38473	1.33997	4.79105	2.57811	3.0861	1.47952	0.185857	0	0.153891	0.142894	5.53656	3.7266	6.44854	5.59662	4.0065	2.71455	0.181571	0	0.306831	0.600395
BnaA01g01040D	19.8963	47.6496	12.5405	8.0793	33.0948	38.3186	16.207	16.71	2.05565	3.02966	0.821423	2.07974	34.1247	29.7054	24.2404	11.2071	14.6584	13.2877	1.0832	0.642437	0.440545	0
BnaA01g01050D	0	0	0	0	0	0	0	0	0	0	0	0	0	0	0	0	0	0	0	0	0	0
BnaA01g01060D	0	0	0	0	0	0	0	0	0	0	0	0	0	0	0	0	0	0	0	0	0	0
BnaA01g01070D	0.07079	0.507707	2.47909	1.95229	0.309988	1.23263	0.931524	1.90192	0	0.114778	0	0	4.59564	5.477	0.862099	0.467876	4.46663	1.72644	0	0	0	0
BnaA01g01080D	0.569087	1.87521	0.347295	0	1.2353	4.02272	2.34201	2.1256	0	0	0	0	0.893636	0.221988	1.93662	0	1.58009	1.27005	0	0	0	0
BnaA01g01090D	0	0	0	0	0	0	0	0	0.300396	0	0	0	0	0	0.435122	0	0	0.190102	0.164234	0	0	0
BnaA01g01100D	5.49925	8.04842	7.07587	6.91678	12.9059	9.21945	11.2537	11.9655	0	0.223007	0	0.183984	11.6725	14.1457	15.7871	9.1057	11.3801	13.9468	0.765349	0.444417	0.292123	0.420583
BnaA01g01110D	0.263568	0	0	0	0	0	0	0	0	0	0	0	0.283714	0	0	0	0	0	0	0	0	0
BnaA01g01120D	2.34257	1.15302	2.87547	1.92333	3.19494	1.90286	2.78189	3.28781	0.182075	0.351045	0.230112	0	1.86903	1.37865	4.58117	1.51508	2.44643	1.33451	0	0.502488	0.102956	0.0948953
BnaA01g01130D	0	0	0	0	0	0	0	0	0	0	0	0	0	0	0	0	0	0	0	0	0	0
BnaA01g01140D	0.225189	0.219369	0	0	0	0	0	0	0	0	0	0	0	0	0	0	0	0	0	0	0	0
BnaA01g01150D	8.26666	16.6028	18.0117	11.7224	25.5287	27.1593	16.1417	12.2527	0	0	0.54449	0	19.8662	13.8112	9.37607	7.5839	29.9266	12.0966	0.301762	0.358423	0.346067	0.337315
BnaA01g01160D	0	0	0	0	0	0	0	0	0	0	0	0	0	0	0	0	0	0	0	0	0	0
BnaA01g01170D	6.79048	11.3872	14.0816	12.238	64.2162	67.6864	14.7741	12.95	0	0.514041	0.200923	0.590695	13.1782	16.6054	14.0089	4.34401	14.514	15.4435	2.30423	1.40464	0.619372	1.01438
BnaA01g01180D	5.99401	10.1464	11.4744	8.43814	39.412	39.2367	14.9099	10.3571	0.285597	0.135957	0.0884079	0.454733	11.9248	14.0222	14.1193	6.33317	9.78212	12.9434	0.176979	2.35221	0.202776	0.735897
BnaA01g01190D	0	0.395819	4.36249	1.41273	0.957623	4.34012	1.13951	0	1.74375	1.19321	0.842685	2.15935	11.2004	1.43009	9.70486	4.20378	0	0.727603	0	0	0	0
BnaA01g01200D	4.86497	3.20941	16.6717	12.174	46.6811	18.6067	7.98999	6.01809	18.7998	22.2599	9.19461	28.3697	35.4309	1.72163	22.7801	16.2093	0	4.949	7.29239	12.9431	9.51093	14.2626
BnaA01g01210D	0.97106	1.368	2.04365	1.5108	5.85846	6.70828	1.95677	1.64158	0.0692276	0.0340809	0.167906	0.0935451	2.34693	1.85949	3.0752	1.64578	3.33569	3.19456	0.318101	0.20817	0.119363	0.247066
BnaA01g01220D	0	0	0	0	0	0	0	0	0	0	0	0	0	0	0	0	0	0	0	0	0	0
BnaA01g01230D	0	0	0.785013	0.864603	0	0	0	0	0	0	0	0	0.609632	0	0	0	0	0	0	0	0	0
BnaA01g01240D	0.222262	0.483622	2.41303	2.9103	0.83424	1.53988	0.55132	1.3116	0.756225	0.188537	1.34101	1.32079	0	0.29127	0.13515	0.122345	0.662984	0.688109	0	0	0	0
BnaA01g01250D	0.0909799	0	0.567992	0.738826	0	0	0	0.152452	0	0	0.231045	0	1.79101	1.90804	0.665344	0.915301	0.218503	0.476676	0.0831469	0	0	0
BnaA01g01260D	0.0409127	0	0	0	0	0	0	0	0	0	0	0.0537998	0	0	0	0	0	0	0.0784719	0	0	0
BnaA01g01270D	0.611057	0.724668	0.840801	1.62671	0.50897	0	0.386599	0.194476	1.17333	0.753776	3.22496	2.12429	7.5088	14.0703	0.292915	0.264684	0.284047	0.12487	0	0.11673	0.114001	0.333947
BnaA01g01280D	0.135011	0	0	0	0	0.321251	0	0	0	0	0	0.185024	0.298485	0	0	0.294786	0.161475	0	0	0	0	0
BnaA01g01290D	0	0	0	0	0	7.30152	0	1.3121	0	0	0	0	0	0	0	0.776085	0	0	0	0	0	0
BnaA01g01300D	2.32623	5.36194	1.87433	0.514697	1.0584	0	3.33527	2.08768	0	0	0.524908	0	0.434067	0	2.38245	0.858257	3.84576	1.65938	0	0	0	0.430269
BnaA01g01310D	40.5727	36.2138	78.0227	62.8463	141.626	139.538	123.438	129.368	5.17878	6.69187	5.1516	9.77272	99.2581	121.507	122.605	95.7923	105.777	181.226	3.06891	3.95334	13.3001	10.6118
BnaA01g01320D	0	0	0	0	0	0	0	0	0	0	0.170436	0	0.083703	0	0	0.0849807	0	0	2.34606	0	0.40575	0.151262
BnaA01g01330D	23.6537	11.0702	21.2028	16.7313	77.3253	65.1775	58.3014	46.0083	8.94998	10.5662	2.81753	11.8563	60.293	68.4823	34.6395	14.7129	26.6929	33.6445	5.88608	2.71761	3.27307	3.22228
BnaA01g01340D	3.24088	2.48758	2.69926	1.2724	6.22669	6.556	7.74427	7.59783	2.27235	1.25755	2.15717	2.60186	8.50793	6.873	9.00423	5.49892	5.52768	6.32727	0.301432	0.287786	0.12791	0.0912528
BnaA01g01350D	0	0	0	0.178705	0.346749	0	0	0	0	0	0	0	0.4606	0.737815	0	0	0	0.292694	0	0	0	0
BnaA01g01360D	3.23084	2.86912	2.46488	1.24582	4.95553	4.47457	4.8702	5.0449	0.533724	1.75366	5.56968	1.68228	5.85783	5.82025	3.64831	2.50831	4.3684	2.63249	0.97068	1.36335	1.13024	1.6346
BnaA01g01370D	1.46324	2.35356	0.731184	0.565598	0.553535	2.69923	3.46197	3.54921	0	0.371761	0	0	2.39715	3.84337	2.29829	0.990935	1.86935	5.42055	0	0	0	0
BnaA01g01380D	2.48911	3.7288	3.22571	2.8162	9.99577	10.6583	3.62313	1.77073	0	0	0	0	6.12476	10.2837	5.38523	2.4944	4.69427	10.0245	0	0	0	0
BnaA01g01390D	0	0	0	0	0	0	0	0	0	0	0	0	0	0	0	0	0	0	0	0	0	0
BnaA01g01400D	7.31071	8.54052	31.5912	26.1227	41.6732	43.6771	43.9439	37.9182	10.3799	8.13629	7.31624	7.65256	41.9256	26.2243	22.5047	11.0111	34.5992	30.8946	0	0	0	0
BnaA01g01410D	2.03031	1.58546	1.34736	1.21276	2.60852	2.43832	5.41327	4.16919	0.496958	0.234277	1.0011	0.472376	4.28247	2.50061	5.0012	3.10616	6.61782	5.76623	0	0	0	0
BnaA01g01420D	1.73531	3.22094	8.57832	7.27696	1.79054	1.99306	4.2056	5.23317	0.633425	0.460695	2.35706	0.708557	3.58251	4.3262	4.10657	4.52829	18.9381	10.0216	0.25059	0.289889	0	0
BnaA01g01430D	1.32231	0.832331	3.81648	1.95848	3.76235	3.41821	4.0242	3.56965	0	0.0692762	0	0	5.05043	5.71342	4.66892	2.59152	1.61854	4.64053	0	0	0	0
BnaA01g01440D	0.39949	0.856619	0	0.366047	1.63342	2.42598	0.335318	0.690175	0	0	0.115693	0	1.4099	1.45354	1.11	0.889182	1.28663	0.609199	0	0	0	0.119125
BnaA01g01450D	0.671099	0.547082	1.25505	0.68264	0.53247	0.801479	0.757021	0.990739	0	0	0	0	1.02352	1.25535	2.59416	1.49132	4.49539	2.5988	0	0	0	0
BnaA01g01460D	0.954257	1.04032	1.74121	1.16211	3.3495	2.80154	2.89334	2.50633	0	0.0446873	0	0	3.62379	4.5622	3.89404	2.81911	5.2165	4.4647	0	0.0853714	0	0
BnaA01g01470D	95.8879	38.0653	126.426	81.3392	168.5	211.122	393.161	511.841	164.129	182.341	0	29.4459	166.695	153.7	176.717	169.912	51.161	208.24	14.6656	15.2967	9.50726	7.88056
BnaA01g01480D	0.22114	0.350995	0.70971	0.479355	1.54044	1.03512	1.24076	1.00749	0	0	0.0420465	0	0.676858	0.53018	1.00861	0.289573	0.763251	0.614316	0.0341884	0.0394984	0.0395406	0.0363622
BnaA01g01490D	0	0	0	0	0	0	0	1.19909	0	0	0	0	0.734787	0.979319	0	0	0	0	0	0	0	0
BnaA01g01500D	0.711803	0.716669	0.91078	0.823217	1.14032	0.737016	1.71076	0.568665	0.285399	1.14833	0.406621	0.201709	1.35657	1.89768	0.648722	0.759645	2.58212	1.83965	0.155911	0.544086	0	0.339051
BnaA01g01510D	0	0.092243	0	0	0	0.590834	0.299957	0.153497	0	0	0	0	0	0	0.11107	0	2.26177	2.56779	0	0	0	0
BnaA01g01520D	0.395547	0.461787	0.488205	0.383902	1.05437	1.37801	1.4396	1.08477	0.483921	0.377613	0.245999	0.605756	1.12449	1.41531	1.26076	0.763609	0.992365	1.08278	0	0	0	0
BnaA01g01530D	0	35.5715	0	0	0	0	0	0	0	0	0	0	0	0	0	0	0	0	0	0	0	0
BnaA01g01540D	0.922649	0.629088	1.26484	0.867042	3.20584	4.16957	3.74916	4.14302	0.116008	0.114011	0	0.0828874	1.07667	2.21403	1.20205	0.384457	3.12885	1.24561	0	0	0	0
BnaA01g01550D	7.92565	8.4617	1.23158	2.35955	5.10923	3.14752	4.45027	1.81786	0	0	0	0	0.925334	2.57146	8.29377	1.94003	0	1.00752	1.46764	0	1.2949	0.420723
BnaA01g01560D	4.73463	1.42736	4.42387	2.05744	4.86645	2.02573	5.6145	0.952355	0	0.439822	0	0	3.30065	2.47292	8.11359	2.98897	0.957343	5.50236	2.42452	3.09719	3.94388	3.12425
BnaA01g01570D	1.30901	0.446151	18.9995	9.53818	7.32672	3.15899	8.52645	4.79902	2.70743	2.27163	0	0.756591	19.5935	15.6357	22.3676	11.6145	12.6453	29.1964	0	0	0	0
BnaA01g01580D	1.85674	1.00667	1.37614	1.31691	0.738289	2.49878	2.64024	1.35259	0.269132	0.269494	0.607179	0	2.11633	1.89741	2.11302	1.57014	3.45271	3.16478	0	0.337981	0	0.664128
BnaA01g01590D	7.74661	11.0234	7.75578	8.06923	0	7.45961	1.91882	1.94848	0	0	0	0	10.3819	13.1279	6.23118	3.47486	10.4757	3.51224	0	0	0	0
BnaA01g01600D	2.53277	2.41515	0.580828	1.54796	0.85983	0.419138	2.66543	2.72755	0	0	0	0	2.99017	2.5745	5.51384	3.19439	5.06361	0.930514	0	0	0	0
BnaA01g01610D	0	0	0	0	2.24633	2.18119	0	0	0.525332	0	0	0.406352	0.645286	0.81255	0.378218	0.638078	0.372305	0	0	0	0	0
BnaA01g01620D	0.58201	1.06782	1.52452	0.373704	2.08103	0.433344	0.33056	0.168868	0	0	0	0	1.54118	1.5218	1.45279	1.36466	1.22001	0	0	0	0	0
BnaA01g01630D	9.13708	9.42636	5.77374	4.28501	11.9059	11.6968	11.1114	11.2085	0.176624	0.700742	0.320711	0.879087	12.7266	7.30854	12.7731	7.91512	12.1331	15.2027	0.466959	0.650775	0.545823	0.725238
BnaA01g01640D	1.16782	1.38405	0.24389	0	0.565544	0	0.325945	0	0	0	0	0	1.45007	1.48088	1.82804	0.586063	1.10823	0.571012	0	0	0	0
BnaA01g01650D	3.62568	1.41776	4.5854	4.44597	9.88047	7.79472	11.1746	11.2086	0.490604	0.947849	0.576305	0.663289	7.54149	7.44807	5.62826	4.75921	8.2714	12.4393	0.853363	1.09582	0.30075	0.0955148
BnaA01g01660D	5.15112	3.30634	5.45135	3.98025	12.111	14.231	13.4192	9.41471	0.150551	0.594025	0.266525	0.744612	13.1567	10.6407	14.1561	7.01912	11.3611	11.3832	0.708432	0.552581	0.0922682	0.351983
BnaA01g01670D	8.88191	11.0506	12.5326	11.2502	31.3593	27.5796	39.7749	36.2627	8.38719	5.18267	6.8474	2.57843	26.5546	37.8029	26.8402	21.9404	35.2766	22.5741	3.07831	1.27331	1.52638	2.43782
BnaA01g01680D	5.95454	3.30095	6.63942	4.42489	31.8175	31.4512	25.0501	22.9405	3.55957	2.1669	0.226457	2.95084	6.52945	8.0933	11.3914	9.24051	7.2952	17.5187	0.82097	0.766652	0.761532	0.823154
BnaA01g01690D	0.770842	0.767414	2.31624	3.59469	8.22686	6.40869	6.10924	6.1975	1.19882	0.390478	0.687949	0.316214	6.72265	4.67671	11.6325	3.61346	3.70877	6.56456	0	0	0	0
BnaA01g01700D	7.9354	5.34011	7.47314	5.18773	42.2474	43.7036	39.6086	28.6783	6.82659	6.09811	3.62126	4.57566	23.0936	21.1723	21.1081	13.5227	25.1906	43.6846	3.73858	4.0107	2.10022	3.01071
BnaA01g01710D	0	0	0	0	0	0	0	0	0	0	0	0	0	0	0	0	0	0	0	0	0	0
BnaA01g01720D	0	0	0	0	0	0	0	0	0	0	0	0	0	0	0	0	0	0	0	0	0	0
BnaA01g01730D	0	0	0	0	0	0	0	0	0	0	0	0	0	0	0	0	0	0	0	0	0	0
BnaA01g01740D	0	0	0	0	0	0	0	0	0	0	0	0	0	0	0	0	0	0	0	0	0	0
BnaA01g01750D	0.267969	0.178346	0.551042	0.493499	0.514463	0.808105	0.867409	0.748989	0.211681	0.157851	0.152078	0.412225	0.689817	0.643402	0.514908	0.24941	0.310888	0.980416	0.0129236	0.0150303	0.0150034	0.042226
BnaA01g01760D	4.58254	3.46809	3.80209	2.61922	6.97085	6.78566	3.52774	3.62999	0	0	0.236719	0.456067	6.06376	8.87091	8.96371	3.2492	5.26152	6.793	0.156054	0	0.17779	0
BnaA01g01770D	0	0	0	0	0	0	0	0	0	0	0	0	0	0	0	0	0	0	0	0	0	0
BnaA01g01780D	0.26862	0	0	0.361772	0	0	0.441089	1.82067	0	0	0	0	1.41686	2.57611	4.7715	1.38409	3.5096	0.561993	0	0	0	0
BnaA01g01790D	10.0422	13.6864	14.6543	13.2386	18.7448	17.6792	13.424	15.739	11.0465	7.33216	23.0748	13.965	13.4573	15.5974	21.2294	12.4522	18.5137	14.9394	0	0	0	0
BnaA01g01800D	18.6299	22.3285	37.1378	11.8768	118.217	96.5028	87.3	79.3568	4.64915	8.72422	0.486961	0	101.797	119.395	37.1425	5.95724	44.711	80.8785	0	0	0	0
BnaA01g01810D	6.42323	3.89634	10.7638	5.99754	18.3592	16.2359	12.8184	12.3749	0.565858	0.568191	0	0	31.2499	28.6823	22.6347	16.5476	15.4029	26.8091	0	0	0	0
BnaA01g01820D	0	0	0	0	0	0	0	0	0	0	0	0	0	0	0	0	0	0	0	0	0	0
BnaA01g01830D	0	0	0	0	0	0	0	0	0	0	0	0	0	0	0	0	0	0	0	0	0	0.202968
BnaA01g01840D	0	0	0	0	0	0	0	0	0	0	0	0	0	0	0	0	0	0	0	0	0	0
BnaA01g01850D	0	0	0	0	0	0	0	0	0	0	0	0	0	0	0	0	0	0	0	0	0	0
BnaA01g01860D	0	0	0	0	0	0	0	0	0	0	0	0	0	0	0	0	0	0	0	0	0	0
BnaA01g01870D	0.103063	0	0.214792	0	1.40082	0.230075	1.35184	1.22332	0	0.166093	0.282539	0	0.552301	0.914345	1.22201	0.436565	1.27676	0.812867	0	0	0	0
BnaA01g01880D	1.04968	0.848613	1.1466	0.483618	2.08565	2.04079	1.08315	0.65613	0.217632	0	0	0.156568	1.16578	2.11807	1.61448	0.578374	1.8892	0.544294	0	0	0	0
BnaA01g01890D	0	0	0	0	0	0	0	0	0	0	0	0	0	0	0	0	0	0	0	0	0	0
BnaA01g01900D	60.6296	49.6926	60.4716	48.1025	121.974	121.693	86.8908	96.3705	0.689996	0.726882	0	0.572267	73.5223	57.8632	67.5066	37.4795	38.7772	43.5189	3.72934	5.37465	7.5271	5.26037
BnaA01g01910D	6.07641	4.50957	3.23398	1.8096	2.83266	4.10511	4.55328	4.09716	0	0	0	0	4.57709	6.27896	5.47393	0.845939	8.77648	8.77857	0	0	0	0
BnaA01g01920D	0.709473	0.889359	0.809238	1.48957	3.35072	4.38037	2.25949	2.44664	0	0	0	0	0.333627	1.77061	1.99408	0.543476	0.900472	1.14694	0	0	0	0
BnaA01g01930D	4.64521	2.24095	2.55383	3.99374	3.58053	6.22386	1.47404	2.51119	0	0	0	0	1.59572	1.98617	3.38344	1.6513	1.42555	0.61389	0	0	0	0
BnaA01g01940D	0	0	0.200895	0.22873	0.910976	0	0.294498	0	0	0	0	0	0.3787	0.676318	0.208595	0	0.204483	0.177995	0	0	0	0
BnaA01g01950D	0.634417	1.1537	0.570654	1.53352	1.64358	1.02225	0.994744	0.333829	0.168237	0.322074	0	0	1.07665	1.45884	1.13907	0.547887	2.35776	1.41846	0	0	0	0
BnaA01g01960D	0.804451	3.43916	1.34649	1.07106	2.2964	3.26997	4.11499	5.07273	0	0	0	0	0.398213	1.01495	3.28588	1.63715	2.71612	0.824362	0	0	0	0
BnaA01g01970D	3.4439	2.3273	2.99765	2.45069	8.96472	6.89779	6.96906	8.5929	0.890209	0.437561	0.604956	0.667442	5.68146	5.45826	6.90572	4.28031	3.62023	5.79199	0	0	0	0
BnaA01g01980D	19.7522	18.892	41.6322	31.1557	76.3435	69.6404	62.3959	61.7563	0.19186	0.187633	0.641565	0.607408	45.9668	79.2717	42.7532	24.6719	98.0649	86.0265	0.1034	0	0.117469	0
BnaA01g01990D	2.31635	1.76978	1.47929	1.09726	3.70444	2.11075	2.70275	3.02086	0	0	0	0.0962773	4.00214	1.99995	3.61788	2.3001	5.53411	3.44543	0	0	0	0
BnaA01g02000D	0.144274	0.145289	0	0	0	0	0	0	0	0	0	0	0.312345	0.937869	0	0	0	0	0	0	0	0
BnaA01g02010D	0	0	0	0	0	0	0	0	0	0	0	0	0	0	0	0	0	0	0	0	0	0
BnaA01g02020D	0.894063	0.591025	2.94773	1.70803	5.3771	5.05291	4.63956	3.26938	2.32133	1.81269	3.23317	2.71734	6.34162	5.20693	4.61942	2.18803	3.05088	3.23307	4.8698	3.39106	1.11006	1.36166
BnaA01g02030D	0.38126	0.201119	0	0	0.483539	0.467822	0	0	0	0	0	0	0.390175	0.244749	0	0	0	0.193485	0	0	0	0
BnaA01g02040D	0.121496	0.0734697	0.0484895	0.0272109	0.0508524	0.0506467	0.0401027	0.0410948	0.0407375	0.0397394	0.096526	0	0.134964	0.158822	0.0898827	0	0.147637	0.0769564	0.0435497	0.0758551	0.152757	0
BnaA01g02050D	8.76541	13.452	30.0287	18.5174	47.7334	36.7314	44.5978	29.4663	10.4367	8.32755	11.2413	6.03794	57.383	38.6552	28.0223	16.2008	45.7283	40.2926	1.1434	4.33894	2.50623	3.00503
BnaA01g02060D	14.4273	15.8409	18.8025	19.4541	29.772	31.2775	6.52297	5.46531	0.18087	0	0	0	15.4567	15.8345	13.0589	8.65525	10.5102	15.4417	0.0990763	0	0.114084	0
BnaA01g02070D	1.95702	1.4111	1.55768	1.40933	9.44832	7.88584	8.43207	9.0979	0	0.230577	0.163041	0	5.89169	8.72309	7.76177	5.11183	3.94531	4.48026	0	0	0	0
BnaA01g02080D	9.64624	7.79672	32.4468	33.1666	29.4592	33.8373	38.6404	22.6953	0	0	0	0	43.83	13.5361	22.1476	13.1743	60.6302	26.3799	0	0	0	0
BnaA01g02090D	58.0414	57.6834	54.2469	46.5148	105.332	107.13	80.3748	76.3478	1.82011	2.85118	8.54782	3.58479	89.0702	66.5604	116.97	60.955	110.953	95.9987	0.329671	0.228664	0.0757624	0.0713355
BnaA01g02100D	11.1968	12.6117	18.7499	18.1277	21.0718	21.2022	21.4966	15.1128	2.17021	1.85232	6.64002	3.33949	19.6413	15.4808	25.2751	12.9448	37.1354	27.1624	0.8162	0.87994	0.875708	0.898008
BnaA01g02110D	2.88167	4.05329	1.89946	2.14481	9.86493	6.14071	7.68644	5.74896	1.03458	1.00476	0.46497	2.13393	5.18429	7.97915	10.6444	4.88191	6.19884	3.565	0	0.614122	0	0
BnaA01g02120D	2.20755	1.02991	1.17944	2.58638	3.73526	3.96757	4.63217	3.95352	0.133038	0.128096	0.2506	0.112036	2.10452	3.14389	5.1628	3.1953	3.17835	1.81753	0.417855	0	0.0804575	0.151767
BnaA01g02130D	0.231485	0.32056	0.663566	1.18592	0	0.172436	0.130019	0.400028	0.131941	0.253941	0.232089	0	1.29661	0.619225	1.41947	1.36177	0.562454	0.741455	0.222377	0	0	0
BnaA01g02140D	0	0	0	0	0	0	0	0	0	0	0	0	0	0	0	0	0	0	0	0	0	0
BnaA01g02150D	2.30696	4.50987	3.56425	4.77385	2.80341	4.02974	4.94405	4.20854	0.0720759	0.354627	1.20108	0.626982	5.72346	6.37044	5.58403	3.7023	7.11505	3.87694	0	0	0.0460754	0.0867976
BnaA01g02160D	8.18487	6.03607	9.51605	7.35631	6.18561	9.87357	16.4366	14.0416	0.672912	1.46121	0.737173	1.10872	16.1507	16.8573	10.5232	7.27094	12.5164	11.4304	0.260702	0.29959	0	0.189219
BnaA01g02170D	3.05545	2.48396	10.9309	7.40131	9.31361	5.22015	3.9752	6.71864	1.82592	0	3.33883	2.16591	14.6517	3.42957	15.3938	9.08251	15.7659	20.6381	0.242666	0.139559	0.54829	0.273213
BnaA01g02180D	4.80803	4.41511	4.59862	3.95883	12.3103	13.7225	9.1453	8.94281	0.290543	0	0	0	8.24938	9.22594	7.99377	4.91512	3.67142	5.28412	1.01615	0.056248	0	0
BnaA01g02190D	11.8531	10.612	6.50081	5.22098	17.1469	15.145	6.89836	8.1268	1.12446	1.0918	2.85265	2.12611	12.9578	15.7478	7.57707	4.09629	6.24946	5.4554	0	0	0	0
BnaA01g02200D	0	0	189.241	0	0	0	0	0	0	0	0	0	0	0	0	0	0	0	0	0	0	0
BnaA01g02210D	0.412298	0.426877	1.7344	1.90804	2.91041	1.74698	1.85145	1.55727	0	0	0	0	4.03238	0.533334	4.41315	3.69218	1.70002	1.04557	0	0	0	0
BnaA01g02220D	29.7779	29.4944	20.5428	16.9381	41.217	48.4362	45.249	49.1277	5.47249	3.34598	2.83627	2.28218	50.0972	40.2051	45.2677	19.921	47.8215	39.2792	4.37415	5.98959	0.582379	0.573979
BnaA01g02230D	0	0	0	0	0.0841425	0	0	0.068929	0	0	0	0	0.046631	0	0.0512143	0.0460429	0	0	0.0391306	0	0	0
BnaA01g02240D	5.23264	5.81122	1.84103	1.23293	2.61884	1.26445	3.7887	2.66905	1.44334	0.238447	0.360183	0.350367	5.12956	2.07934	0.89506	1.60532	4.82937	4.93578	1.04834	0.460636	0.463984	0.71764
BnaA01g02250D	0	0	2.44798	0	0	0	0	0	0	1.08625	0	0	0	0	2.17424	0	0	0	0	0	0	0
BnaA01g02260D	4.44848	4.97348	11.185	6.41595	12.1355	16.0267	14.495	14.5275	0	0.344738	0	0	17.162	21.8506	15.7364	7.8083	14.3013	17.4809	0	0	0	0
BnaA01g02270D	7.3323	11.9504	20.8784	19.512	36.3959	30.2524	42.2468	33.8085	21.2667	21.5562	34.9765	13.106	37.4326	31.7861	30.4833	20.7983	70.0226	37.5197	8.00386	9.54821	14.1301	11.4476
BnaA01g02280D	0	0	0	0	0	0	0	0	0	0	0	0	0	0	0	0	0.0847183	0	0	0	0	0
BnaA01g02290D	3.58016	1.31333	6.25278	2.48465	10.2808	11.0062	2.7514	2.37829	1.05033	1.13332	0.854899	2.72194	4.63258	4.15876	9.23689	6.47501	1.89666	5.0743	0	0	0	0
BnaA01g02300D	2.09572	2.34643	3.95629	2.73792	2.0606	2.0386	3.24919	3.06459	0.384902	0.320353	1.34304	0.706612	6.61395	4.94494	6.74444	3.23433	4.41072	4.13432	0.812399	0.617484	0	0
BnaA01g02310D	0	0	0	0	0	0	0	0	0	0	0	0	0	0	0	0	0	0	0	0	0	0
BnaA01g02320D	0.863242	0	0.36418	0	0	0	0	0	0	0	0	0	0.358309	0	0.613951	0.542909	0	0	0	0	0	0
BnaA01g02330D	5.87254	18.442	12.9671	5.96462	26.9538	7.53986	0	0	0	0	0	0	13.7019	8.10892	31.3634	12.4642	0	4.70051	0	0	0	0
BnaA01g02340D	169.487	117.911	175.411	86.2972	50.3098	55.1449	75.0503	67.4331	41.4643	48.7129	2.17265	3.10375	158.182	173.492	95.168	74.7091	20.0414	120.146	0	0	0.370969	0
BnaA01g02350D	0	0	0.306423	0.172975	0	0.165236	0	0	0	0	0	0	0	0.100513	0	0	0	0	0	0	0	0
BnaA01g02360D	0	0	0	0	0	0	0	0	0	0	0	0	0	0	0	0	0	0	0	0.114901	0	0
BnaA01g02370D	18.4463	16.5238	36.6604	32.0121	56.4938	56.0723	65.2966	60.5595	18.4995	16.1363	22.0874	19.3607	63.6861	90.5201	71.1548	49.0183	74.6765	90.7743	0.0618448	0.107292	0.496919	0.408083
BnaA01g02380D	0	0	0	0	0	0	0	0	0	0	0	0	0	0	0	0	0	0	0	0	0	0
BnaA01g02390D	0	0	0	1.93734	0	0	1.81194	0	0	5.63006	10.7895	7.77604	1.02419	0	1.20117	0	0	0	0	0	0	0
BnaA01g02400D	0.785154	0	0	0	0	0	0	0	0	0	0	0	0	0	0	0	0	0	0	0	0	0
BnaA01g02410D	0	0	0.968704	0	0	0	0	0	0	0	0	0	0	0	0	0	0	0	0	0	0	0
BnaA01g02420D	3.25803	1.72823	3.06411	2.14152	19.2467	26.2044	15.6243	12.7308	2.31687	4.85973	0.891572	1.8492	11.8696	5.77516	10.0813	2.817	3.11248	7.66286	0	0	0	0
BnaA01g02430D	0.531747	0	0.600159	1.97874	2.8357	1.3092	2.64857	0	0	0	0	0	2.66409	0	3.14801	1.16169	0	2.20324	0	0	0	0
BnaA01g02440D	9.79671	6.85061	31.3837	24.5942	46.0997	59.2762	40.1294	47.2397	0.102424	0.2942	0	0	32.7685	42.5484	45.2416	23.9392	27.7272	84.4645	0	0	0	0.0542151
BnaA01g02450D	5.51434	0.218032	0	0.164198	1.97805	3.30363	0.370795	0	0.124558	0.118003	0	0.0990977	18.15	30.8206	0.944748	1.98095	0.729909	10.4104	0	0	0	0
BnaA01g02460D	7.85548	3.66474	8.23939	10.0276	8.46674	6.43018	7.51949	6.62258	0	0.118314	0	0.291319	17.2447	24.9913	5.37963	5.52114	5.88681	20.7938	1.88387	1.68522	0.0702417	0
BnaA01g02470D	27.6285	49.078	23.3392	15.9124	64.7793	53.5561	24.4857	23.1373	0	0	0	0	18.0141	47.1755	7.92939	2.81719	12.3156	25.8428	0.618273	0	0	0
BnaA01g02480D	2.11681	2.88506	1.30771	2.19874	4.41368	3.56216	0.994747	1.53365	0	0	0.20163	0.377618	2.49379	1.73287	5.92835	2.72608	2.65292	1.81012	0	0	0	0
BnaA01g02490D	88.3004	31.3831	72.3961	41.547	74.7441	89.6966	92.5359	112.636	0	0.823704	0	0	146.349	174.068	218.741	161.443	68.5331	261.103	0	0	0	0
BnaA01g02500D	4.13359	2.6542	1.42991	1.21629	6.21784	5.14351	3.92039	3.14973	2.11968	2.05038	3.60861	2.61235	4.42355	8.72849	5.50967	3.04311	5.10666	4.77449	0.578548	0.112262	0	0
BnaA01g02510D	0.293531	0.101797	5.06726	4.39229	1.26327	2.05903	0.478516	0.64697	0	0	0.31921	0.546016	11.1359	10.6383	3.62254	2.70072	5.05804	4.24646	0	0	0	0
BnaA01g02520D	3.03237	1.12573	5.28975	3.00185	6.19652	6.10053	8.94201	4.06012	0.374632	0.554289	0.261386	0.541092	8.69504	6.64687	5.89851	2.2389	3.401	5.919	0	0	0	0
BnaA01g02530D	2.72588	8.60454	9.72536	11.1114	25.0424	9.46124	17.8006	12.6354	0	0	0	0	26.9344	12.1458	6.59454	5.67409	13.896	5.84365	0	0	0	0
BnaA01g02540D	28.721	41.5013	127.307	95.4287	144.19	163.554	118.208	127.497	0	0	0	0	71.4776	137.521	55.9062	28.4865	81.4117	97.3693	0	0	0	0
BnaA01g02550D	0	0	0	0	0	0	0	0	0	0	0	0	0	0	0	0	1.84545	0	0	0	0	0
BnaA01g02560D	0	0	0	0	0	0	0	0.343144	0	0	0	0	0	0	0	0	0	0	0.151632	0	0	0
BnaA01g02570D	3.11271	5.36316	6.348	5.63536	1.99022	5.26854	2.86698	0.585718	0	0	0	0	18.2136	1.82269	9.9121	8.77727	1.19524	1.0678	0	0	0	0
BnaA01g02580D	0	0	0	0	0.139874	0	0	0	0	0	0	0	0	0	0	0.0778238	0	0	0	0	0	0
BnaA01g02590D	9.99552	7.27303	5.65791	4.12418	25.3735	32.9261	26.3122	20.8794	1.89565	1.83263	3.92981	5.26773	29.006	38.7365	29.5386	18.9691	13.3369	20.9355	1.77811	1.23668	1.14604	1.01574
BnaA01g02600D	0	1.71426	1.53028	0	1.16195	0.540587	1.15321	2.72074	0	0	0.298246	0	4.39524	2.68079	3.66221	1.91217	2.98186	0.692807	0	0	0	0
BnaA01g02610D	15.3811	9.7982	8.00125	4.99571	11.3813	8.8669	7.90708	8.02245	0	0	0	0	15.9112	20.0986	14.4927	7.42235	17.7131	18.9845	0	0	0	0
BnaA01g02620D	4.11932	16.3262	0.896711	0.75791	13.1255	10.4179	2.52252	2.72154	0.553101	0.184393	0.257643	0.649945	1.76105	5.70405	5.39072	1.23608	5.1437	3.76835	0.102947	0.241505	0.120827	0.334845
BnaA01g02630D	2.91721	3.77576	3.65781	2.71922	8.30754	9.10072	0.737307	0.446238	0	0	0	0	12.658	14.0283	10.2422	7.1435	7.05602	6.01388	0	0	0	0
BnaA01g02640D	10.4124	8.15745	11.3966	9.55991	20.381	18.3859	27.4546	24.2888	11.8454	11.4924	10.0075	10.5544	24.0363	20.3672	26.2969	13.1172	25.2692	29.7502	4.92053	5.25217	0	0
BnaA01g02650D	18.1046	12.4594	4.13748	3.80192	10.9432	10.6496	23.5911	21.5931	5.47472	5.84619	13.3551	2.88343	37.5434	36.6876	47.7084	22.2336	16.8974	13.8264	2.46542	5.97591	0	0
BnaA01g02660D	6.35403	4.23336	10.721	7.509	20.1043	18.263	18.8191	15.8415	0.928881	0.440842	0.224292	0.801328	24.7709	25.6139	21.3991	13.1848	8.33272	12.4498	0.925927	0.540512	0	0
BnaA01g02670D	17.758	15.6194	18.0597	13.3489	22.9923	24.675	22.1634	20.8546	3.53177	3.64429	1.76648	3.00389	40.1601	33.4684	34.7623	23.6213	30.1646	34.4676	5.70029	7.16767	0	0
BnaA01g02680D	0	0	0	0.073587	0	0	0	0	0	0	0	0	0	0	0.0738232	0	0	0	0	0	0	0
BnaA01g02690D	2.64358	3.01895	4.13173	3.15439	3.31753	2.47769	2.68391	2.27835	0.309287	0.361041	0.137368	0.355736	4.33024	7.97308	1.76107	1.2607	4.33817	8.8662	0.100156	0	0.157689	0.0725602
BnaA01g02700D	0.257831	0	0	0	0	0	0	0	0	0	0	0	0	0	0	0	0	0	0.716637	0.139292	0	0
BnaA01g02710D	8.04257	6.3185	3.93287	3.47098	13.0303	11.4896	3.25493	3.39624	0	0	0	0.977486	7.53765	4.00029	11.6475	5.70328	3.61095	8.27856	0.700204	1.23187	0.821983	0
BnaA01g02720D	0	0	0	0	0	0	0.280355	0	0	0	0	0	0	0	0	0	0	0	0	0	0	0
BnaA01g02730D	0	0	0	0	0	0	0	2.60091	0	0	0	0	0	0	0	0	0	0	0	0	0	0
BnaA01g02740D	2.88132	3.17739	3.3664	1.89095	4.74294	3.73586	2.77479	3.68558	0.381964	0.645654	0.784512	0.205409	4.01049	6.60647	5.95867	4.16337	6.03626	4.39757	0.587298	1.06302	1.20158	0.872119
BnaA01g02750D	0	0	0	0	0	0	0	0	0	0	0	0	0	0	0	0	0	0	0	0	0	0
BnaA01g02760D	0	0	0	0	0	0	0	0	0	0	0	0	0	0	0	0	0	0	0	0	0	0
BnaA01g02770D	1.47809	1.99789	2.85738	1.6845	3.50772	3.7949	3.88608	3.60323	0	0.110868	0	0	4.08461	5.91627	4.1942	1.77296	6.24371	3.14904	0	0	0.0702635	0
BnaA01g02780D	6.81252	7.3718	14.6436	10.3404	1.77145	0.967672	28.5584	30.2631	0	0	0.372317	0.184649	19.5053	12.4539	29.0452	17.9215	21.4455	14.9129	0	0	0	0
BnaA01g02790D	1.68511	2.52141	2.07465	1.06697	6.28921	8.51589	4.3054	4.08398	0	0	0	0	3.67839	5.00771	3.62743	2.31797	3.03159	2.93875	0	0	0	0
BnaA01g02800D	1.51206	0.908368	1.41667	0.705125	4.29845	2.27851	4.07872	2.68876	2.55903	2.16403	2.87855	2.54925	4.12948	3.0886	2.36366	1.38117	1.92327	1.68026	0.86926	1.05033	1.15868	1.02174
BnaA01g02810D	45.7787	39.6312	33.7153	21.1912	165.507	167.271	291.803	319.173	1.02315	0	8.35026	33.9463	60.6212	82.9388	77.4654	64.2405	49.4069	100.173	0	0	0	1.16092
BnaA01g02820D	1.48468	0.872266	1.04318	0.715049	1.45881	1.96107	2.10181	2.16175	0	0.0944983	0.230118	0.216497	1.71143	2.82072	1.86938	1.30903	4.29482	2.22942	0	0.0585143	0	0
BnaA01g02830D	5.64823	4.81119	18.8482	10.7973	42.9834	39.0705	15.4331	15.8657	8.03131	9.53053	11.8126	11.4105	23.2076	21.4964	26.1726	20.0462	8.22568	21.2714	0.906095	1.33625	0.78259	0
BnaA01g02840D	2.81335	1.24942	8.37994	3.02016	10.9629	15.839	7.05343	8.23762	0.770066	0.749985	0.371769	0.364022	10.0808	10.9507	3.74447	4.13516	9.15581	12.1788	0	0	0	0
BnaA01g02850D	26.6082	9.01481	3.97794	9.81867	29.0368	9.41678	9.57475	19.1502	0	2.17989	0	2.34968	15.1445	22.4423	47.7446	21.8511	8.01806	28.7012	0	0	0	0
BnaA01g02860D	1.82382	1.78905	5.54017	3.84697	23.3601	21.7578	8.87093	7.6625	0.749458	1.12808	0.0710205	0.391261	18.0516	20.6504	28.3917	17.0906	5.2655	12.9241	0	0	0.419187	0.693245
BnaA01g02870D	0.808382	0.30362	2.149	0.341054	8.68859	9.79842	3.91131	3.00966	1.16144	1.13875	0	1.38281	6.96341	9.32444	0.984439	0.318933	0.351556	7.11729	0.889569	0	0	0
BnaA01g02880D	3.14135	3.72045	16.0103	13.8809	20.18	17.6008	5.83675	5.8141	3.24682	3.26611	13.9486	6.35204	15.001	12.1243	14.5721	9.51311	14.6605	9.52037	0.732747	0.309209	0.30638	0.144922
BnaA01g02890D	0	0	0	0	0	0	0.187321	0	0	0.194228	0	0	0.61969	0	0	0	0.277544	0	0	0	0	0
BnaA01g02900D	1.45471	0.1811	1.13121	0.213923	3.31722	2.72922	0.8252	0.845251	0.545944	0.551401	0.414032	0.418849	1.66377	2.41177	0.780049	0.531373	1.91018	2.65424	0.326109	0	0.576267	0.177571
BnaA01g02910D	3.30694	3.22085	10.6107	10.2742	17.4021	19.4823	10.3948	9.59148	0	0.0940625	0	0	16.6691	33.5489	9.13538	4.57988	8.96226	18.1549	0.868496	0.0595668	0	0
BnaA01g02920D	6.58851	5.30798	6.23258	3.74241	16.4475	14.2383	11.3009	9.57177	0	0	0	0	12.8544	9.40888	11.3483	7.8016	7.46098	10.1598	0	0	0	0
BnaA01g02930D	2.70349	1.02592	8.52841	2.4842	13.6151	13.7893	7.74376	5.13871	1.64901	2.6862	0	2.36586	53.4765	22.7764	10.8008	6.40618	6.19204	17.3707	4.70207	1.69237	0.472495	0.956813
BnaA01g02940D	54.3216	143.499	154.256	159.42	364.444	337.46	255.616	272.631	0	1.93961	0	0.515054	278.906	383.012	196.163	84.7519	373.015	170.202	0	0	0.404776	0.397393
BnaA01g02950D	16.009	14.0189	15.4658	12.5194	33.204	40.0841	27.9237	22.5737	0.487058	0.948058	0.122123	0.118866	36.2361	43.3004	21.7613	17.6779	45.5208	40.5391	0	0	0	0
BnaA01g02960D	0	0	0	0	0	0	0	0	0	0	0	0	0	0	0	0	0	0	0	0	0	0
BnaA01g02970D	7.73222	2.51624	8.93097	3.14909	15.4225	16.1499	19.6149	21.2485	1.07044	0.842897	0.343661	2.08219	23.7935	41.0334	23.6398	12.9394	1.80591	17.1447	0.339923	0	0.801854	0.759649
BnaA01g02980D	0.199607	1.12834	1.16915	0.511506	1.51938	3.48634	2.10846	3.3179	0.706744	0.342096	1.04964	0.614867	4.05582	2.38872	7.59254	4.7535	4.25789	2.30187	0	0	0	0
BnaA01g02990D	2.07686	3.13166	2.93354	2.18456	5.66005	4.61862	2.97507	2.70326	0.262171	0	0.0981164	0.191693	5.17523	10.6965	5.121	2.19083	3.01381	5.9195	0	0	0	0
BnaA01g03000D	0	0	0	0	0	0	0	0	0	0	0	0	0	0	0	0	0	0	0	0	0	0
BnaA01g03010D	4.3244	6.45949	2.73693	2.87376	10.155	9.04132	11.8426	10.8953	0	0	0.555951	0	8.81917	15.8793	7.01925	3.10508	12.3715	12.4239	0.065512	0	0	0
BnaA01g03020D	0	0	0	0	0	0	0	0	0	0	0.100145	0	0	0	0	0	0	0	0	0	0	0
BnaA01g03030D	0	0	0	0	0	0	0	0	0	0	0	0	0	0	0	0	0	0	0	0	0	0
BnaA01g03040D	2.15646	3.51959	10.0484	10.7367	7.51476	4.66117	0.428039	2.15929	0	0	0	0	5.96548	11.9056	0	0	5.13649	0	0	0	0	0
BnaA01g03050D	9.57989	12.5916	7.15581	6.13217	38.0022	45.2451	21.9989	22.2389	1.21559	1.69597	0.859713	1.59087	41.8371	46.8957	46.946	28.2528	20.273	40.9649	0.115466	0	0	0
BnaA01g03060D	3.38445	2.10646	12.2576	9.98113	27.1873	25.5857	7.66477	5.891	3.10534	3.53525	4.02844	3.18515	17.719	25.9255	8.75172	5.47285	16.3751	22.9253	0.32481	0	0	0.0396638
BnaA01g03070D	3.01508	2.68996	2.24629	1.99782	5.45907	4.31154	3.08794	3.29927	0.211703	0.26204	0.180274	0.380585	3.6875	5.96186	3.70591	2.28721	4.36865	3.49474	0.847892	0.0356516	0	0
BnaA01g03080D	0.351945	5.76196	5.6592	3.79929	3.49108	4.01429	5.59175	5.55236	0	0	0	0	11.7018	7.81209	16.4981	7.0633	34.403	16.9775	0	0	0	0
BnaA01g03090D	0.0793225	0.170327	0	0	0.37814	0.3826	0.538693	0.283165	0	0	0	0	0.251216	0.101907	0.18938	0	0.0910237	0	0.138771	0.0812976	0	0.0791986
BnaA01g03100D	17.3264	11.9362	5.75476	5.50757	12.3985	28.5226	12.778	31.0465	0	0	0	0	22.6391	19.2958	19.1186	18.5499	5.722	7.92256	0	0	0	0
BnaA01g03110D	0.631894	0.922542	0.274621	0.151047	1.98948	1.41231	1.84536	2.94136	0	0.209039	0.594412	0.304842	1.8173	0.861135	0.616914	0.141111	0.920304	1.2082	0	0	0	0
BnaA01g03120D	7.50293	3.13245	3.34301	1.49781	7.13521	9.92382	8.63817	6.99445	0.48297	0.311643	0.130285	0.741776	8.80931	6.7906	7.92932	5.39004	5.83758	11.289	0.750404	0.483864	0.193792	0.371692
BnaA01g03130D	1.56438	1.52919	2.60975	2.07568	0.605178	1.73526	3.33086	0	0	0.409262	0	0	2.56164	1.67267	3.70188	1.36121	2.40779	1.35575	0.644303	0.501308	0.495745	0.240387
BnaA01g03140D	15.5345	14.8658	6.85663	8.34681	14.9611	26.143	24.1439	19.7179	1.52609	0.815361	0.571225	1.78916	3.37729	3.2258	4.49289	2.90912	4.32798	2.32608	0	0	0	0
BnaA01g03150D	661.66	527.654	988.951	662.7	1446.31	1575.74	684.891	729.659	0	53.9527	0	0	442.392	435.287	667.468	341.242	187.367	573.143	5.18027	0	33.4454	13.681
BnaA01g03160D	0	0	0	0	0	0	0	0	0	0	0	0	0	0	0	0	0	0	0	0	0	0
BnaA01g03170D	0	0	0	0	0	0	0	0	0	0	0	0	0	0	0	0	0	0	0	0	0	0
BnaA01g03180D	0	0	0	0	0	0	0	0	0	0	0	0	0	0	0	0.123572	0	0	0	0	0	0
BnaA01g03190D	0	0	0	0.338954	0	0	0	0	0	0	0	0	0	0	0	0	0	0	0	0	0	0
BnaA01g03200D	16.1917	46.5618	96.0367	87.3519	2.85247	4.68477	6.39599	5.50387	0.39792	1.03426	1.81676	0.174612	5.88389	5.1816	9.15316	19.2254	39.8858	2.24317	0.0747429	0.174655	0.0859899	0.247321
BnaA01g03210D	2.43303	7.05675	2.25451	2.17399	24.2611	23.399	3.06661	3.67901	0	0	0	0	5.4762	3.21329	2.28233	0.722673	3.31124	2.56395	0	0	0	0.602494
BnaA01g03220D	0.24803	0	0	0	0	0	0	0	0.416018	0	0.330433	0	0	0.650631	0	0	0	0.507982	0.212875	0	0	0
BnaA01g03230D	8.36334	5.75046	6.44514	5.52048	12.741	12.8035	16.8806	15.4241	3.78697	5.41008	4.35696	8.75425	15.8878	27.8772	12.824	10.0793	22.3166	24.96	1.46302	1.76642	3.66014	4.36842
BnaA01g03240D	1.27878	4.41068	2.61131	1.69163	20.3913	16.9614	7.60614	6.75292	0.092962	0	0.275615	0	4.02659	4.00937	6.92838	2.25451	7.96308	4.42242	0	0	0	0
BnaA01g03250D	0	0	0	0	0	0	0	0	0	0	0	0	0	0	0	0	0	0	0	0	0	0
BnaA01g03260D	0	0	0	0	0	0	0	0	0	0	0	0	0	0	0	0	0	0	0	0	0	0
BnaA01g03270D	8.68793	11.4852	12.3373	10.0054	19.9617	19.3071	16.1196	14.4605	2.59392	2.05355	3.5957	3.74972	14.899	15.911	9.13349	6.07322	23.8568	15.6761	1.98196	0	3.70178	3.43285
BnaA01g03280D	1.5092	0.983655	0.345205	0.384581	8.67428	7.37915	3.23464	2.72189	0.280748	0	0.213809	0.208991	1.43046	1.7755	1.00306	1.65038	2.17674	2.25967	0.148556	0	0	0
BnaA01g03290D	0	0	0.780671	0.426821	0	0	0	0.155011	0	0	0	0	6.63583	8.29107	7.04615	4.85582	0.9701	9.39551	0	0	0	0.095185
BnaA01g03300D	14.2397	72.3653	2.70409	6.17329	21.6076	5.54648	12.666	30.4005	0	0	0	0	4.19367	8.39459	1.64842	0	34.0346	1.499	0	0	6.05382	1.65481
BnaA01g03310D	14.5188	34.7177	22.0767	14.765	11.8428	18.1156	31.9595	36.1627	0	0	3.87945	0	62.6705	49.4325	53.2503	36.2066	34.1242	31.3016	0	0	0	0
BnaA01g03320D	4.30291	2.87102	4.69026	3.9948	5.3402	4.56492	5.32792	3.98776	0.346333	0.0835951	0.200019	0.129686	7.55708	9.25741	7.50224	4.07384	6.57653	7.86829	0.135791	0.0527695	1.94811	2.55105
BnaA01g03330D	1.91745	1.22465	7.24974	7.75633	0	5.84261	0	1.58384	0	0	0	0	36.8606	47.4128	44.5821	24.2062	46.3658	1.9089	0	0	0	0
BnaA01g03340D	0.394585	0.76949	0	0	0	0	1.26084	0.646738	0	0	0	0.512451	0.78502	0	0.478076	0.409904	2.30838	0.8218	0	0	0	0
BnaA01g03350D	0.685057	0.494106	0.893073	0.842255	1.32745	1.61441	1.36827	0.89782	0	0.0808227	0.33838	0.169134	1.38006	1.93044	1.51307	0.992221	1.88783	1.11744	0	0	0	0
BnaA01g03360D	3.14716	3.04099	2.75946	1.95993	7.33895	7.1597	4.82035	4.54752	0	0.161109	0.692198	0.345094	4.84754	4.98563	4.03504	2.22497	4.81809	3.63209	1.26056	1.1547	0	0
BnaA01g03370D	1.015	1.92685	1.84123	2.05388	1.63264	0.552359	1.62034	1.84495	0.208289	0.202371	3.58763	0	1.33166	2.43473	0	0	2.9153	1.40586	0	0	0	0.130941
BnaA01g03380D	5.29916	5.05185	4.83317	3.95784	18.9105	14.7158	12.7214	11.3555	0.734544	1.48866	1.71367	2.68249	12.8624	12.3831	15.1168	9.4608	16.0059	16.333	1.24452	0.611902	0	0
BnaA01g03390D	3.05324	1.8854	4.81298	4.43286	16.5433	17.82	14.4542	13.6661	0.447141	0.28335	0.70446	0.945889	6.74182	6.14412	12.1447	6.85811	5.70167	10.6389	0.652393	0.0442531	0	0
BnaA01g03400D	21.5631	16.792	36.0384	29.7332	93.6102	82.7432	108.606	87.0331	9.59245	10.5419	5.66605	8.2812	85.8971	102.009	112.309	56.6206	68.0061	150.792	0	0	0	0
BnaA01g03410D	1.0103	2.08241	2.42262	2.1457	4.96697	3.09952	5.47228	3.05786	0.211796	0.138293	0.0932564	0.0465882	2.49337	3.0016	4.65674	2.03967	10.4237	6.71	0	0.0903897	0.0448735	0.084422
BnaA01g03420D	1.37998	1.41584	2.21859	1.89806	6.02586	3.48636	2.54584	2.20538	0	0	0	0	1.64221	3.5815	2.39087	1.51225	0.880142	3.43783	0	0	0.115128	0
BnaA01g03430D	6.69797	10.6545	10.2642	12.0445	27.5492	21.7353	18.7176	15.55	6.01712	6.84127	6.68142	4.79335	24.3663	27.9751	20.7197	9.53599	35.5412	22.1178	0.76773	0.33322	0.667004	0.422111
BnaA01g03440D	9.03708	13.0515	41.0421	24.571	51.1772	51.3367	31.8751	32.1084	20.1167	14.0771	16.5429	19.5796	23.8533	36.217	22.605	13.4942	20.859	21.7742	0.363389	0.631597	1.42536	2.58983
BnaA01g03450D	6.33527	9.67816	5.89548	5.1319	17.4999	20.8872	14.3303	12.6632	0	0	0	0.548776	19.9159	14.5814	29.936	25.434	47.745	42.8968	0	0	0	0
BnaA01g03460D	6.58636	12.3109	19.7115	16.9502	16.5795	12.3321	30.2051	31.8124	2.28857	1.19243	4.79298	1.16554	28.161	28.2053	27.289	20.416	30.3469	32.9206	0	0	0	0
BnaA01g03470D	0	0	0	0	9.29202	0	1.38901	0	0	0	0	0	0	0	0	0	0	0	0	0	0	0
BnaA01g03480D	6.89304	7.47342	15.474	14.3774	30.9404	30.7762	15.8849	16.5081	0.343714	0.670255	0.820389	1.35195	22.7641	24.7502	24.9563	15.6369	30.4372	21.4651	0.168077	0	0	0
BnaA01g03490D	0	0	0	0	0	0	0	0	0	0	0	0	0	0	0	0.416425	0	0	0	0	0	0
BnaA01g03500D	0.39072	0.388538	0.195155	0.220297	2.11012	0.849096	0.942736	0.81096	0	0	0	0	1.33475	1.61009	0.47467	0.629486	0.340616	1.29775	0	0	0	0
BnaA01g03510D	6.56229	5.92747	3.53266	3.92119	6.44436	5.10477	3.32056	3.64365	0.856075	1.86213	1.75382	1.47144	9.78463	8.3484	11.1223	5.65617	7.04442	7.99355	0	0.45929	0	0
BnaA01g03520D	0.416484	0.299109	0	0	0.664946	0.319669	0	0	0	0.239246	0	0	0	0.187484	0.341119	0.159873	0	0	0.134818	0.472489	0.152433	0
BnaA01g03530D	3.97664	3.36941	3.65617	1.78306	6.10896	6.59307	3.44018	5.01084	0.586207	0	1.17703	0.443319	6.33477	9.27353	0	0	6.32391	0	0	0	0	0.164084
BnaA01g03540D	1.59166	0.524586	4.62724	2.4717	7.58904	8.3381	8.57743	7.00049	1.30122	0.386264	0.175504	1.21702	4.52812	4.66329	5.54135	3.38599	0.364956	5.3953	0	0	0	0
BnaA01g03550D	1.37126	0.871443	1.37747	0.911334	2.02859	2.50238	1.77344	2.03427	0.401728	0.278324	0.630923	0.619859	2.33065	2.23907	2.51935	1.61706	2.40178	3.2442	0.135565	0.052264	0.0263905	0.0715925
BnaA01g03560D	11.2912	13.8834	20.628	19.0942	23.2244	25.2236	12.6282	13.2827	2.43969	0.706928	0	0	22.6021	33.0334	24.8934	15.4087	26.4985	34.5049	2.17613	1.69687	3.53467	4.117
BnaA01g03570D	0.384798	0.189239	0.574154	0.49958	0.527206	0.394599	0.418433	0.532101	0.106849	0.314559	0.24523	0	1.40559	1.15142	0.782838	0.56723	0.602883	0.529768	0	0	0	0.0643155
BnaA01g03580D	0.863184	1.28606	1.29022	0.87456	2.0984	2.10474	0.611801	1.00598	0.0778611	0.0761846	0.18258	0.116129	1.90575	3.84229	1.57323	0.827948	2.48015	2.21969	0.374609	0.531774	0.577012	0.0904443
BnaA01g03590D	2.95444	0.984314	14.591	6.38437	21.3844	26.7683	30.4177	26.8103	5.50265	2.30049	0	3.85371	23.9844	10.49	24.1599	18.9189	0.695101	10.2951	3.3103	2.99477	1.42072	0.922354
BnaA01g03600D	28.3838	15.227	31.7833	22.6679	27.0237	29.0832	28.8066	38.6075	0	0	0.386145	2.1183	61.7462	84.9145	64.4968	35.8847	50.9528	83.8575	0	0	0	0.229889
BnaA01g03610D	2.32588	2.52227	4.99244	3.60278	7.69394	8.31565	9.13554	8.5311	1.03733	0.884208	0.631242	1.03887	7.74486	7.9617	8.76225	5.58516	8.46802	5.49424	0.739164	0.636115	0	0
BnaA01g03620D	0.224598	0.0780973	0	0	3.56882	5.48618	0.250921	0.258355	0.385471	0.249453	0	0.599517	2.34717	4.45789	2.73768	0.927491	0.175404	0.153212	0.355491	0.330167	0	0
BnaA01g03630D	3.35968	3.25375	3.13914	2.63662	8.3629	9.81852	8.80959	9.18053	0.820932	0.553094	0.957176	1.22609	11.4253	9.28605	12.7683	5.95869	10.0184	6.53811	0.897854	0.593908	0	0
BnaA01g03640D	2.26768	1.46472	2.03824	1.81838	4.44653	5.9581	6.16517	5.20758	1.60882	1.59209	2.16261	2.86884	4.58309	5.25405	5.00776	2.48539	3.98733	4.14199	1.66126	1.48238	1.0758	0.921524
BnaA01g03650D	4.88817	8.86171	4.71384	5.39449	10.0353	7.15219	9.41399	9.8002	0	0	0	0	15.8016	8.32805	18.3344	10.7623	8.0418	9.97861	0	0	0	0
BnaA01g03660D	0.510252	0.148963	0.405265	0.12596	0.153706	0.0772792	0.502082	0.695534	0	0.122848	0	0	0.470068	0.402063	0.483914	0.130105	0.379719	0.449171	0.0335733	0	0	0.0364072
BnaA01g03670D	1.64939	0.94813	0.962247	1.07885	2.96876	1.16932	3.56265	2.15054	0	0	0	0	3.90586	3.95417	2.60152	1.33253	1.20056	4.33345	0.108202	0.126245	0	0
BnaA01g03680D	0.314143	0.773043	0.106986	0.196057	0.216207	0.502999	0.171934	0.174628	0.118473	0	0.392915	0.0398934	0.159544	0.18551	0.0430473	0.0395109	0.676844	0.474774	0.134012	0.156088	0.155784	0.184725
BnaA01g03690D	0	0	0	0	0	0	0	0	0	0	0	0	0	0	0	0	0	0	0	0	0	0
BnaA01g03700D	0	0	0	0	0	0	0	0	0	0	0	0	0	0	0	0	0	0	0	0	0	0
BnaA01g03710D	0	0	0	0	0	0	0	0	0	0	0	0	0	0	0	0	0	0	0	0	0	0
BnaA01g03720D	0	0	0	0	0	0	0	0	0	0	0	0	0	0	0	0	0	0	0	0	0	0
BnaA01g03730D	5.86071	5.7865	5.64965	6.25782	8.03332	7.72652	9.67566	8.40295	0	0	0	0.19348	6.87616	2.30023	11.8	7.33267	1.5551	1.36371	0	0	0	0
BnaA01g03740D	1.80038	1.16165	0.740391	0.816287	8.19808	5.08341	2.54078	4.06372	0	0	0.548994	2.17163	3.60252	2.6763	2.14787	0.696932	2.46489	3.80861	0.199724	0.23116	0	0
BnaA01g03750D	0	0	0.170485	0	0	0	0	0	0	0	0	0	0	0	0	0	0	0	0	0	0	0
BnaA01g03760D	0	0	0	0	0	0	0	0	0	0	0	0.229086	0	0	0.129682	0	0	0.107603	0.284712	0.220395	0	0
BnaA01g03770D	0.119845	0	0	0	0.252718	0	0	0	0	0	0	0	0	0	0	0	0	0	0	0	0	0
BnaA01g03780D	2.78343	4.06039	2.49029	2.70327	0	14.4236	0	4.77655	0	0	0	0	1.36079	3.96855	1.50842	1.38578	1.5732	2.77557	0	0	0	1.70082
BnaA01g03790D	8.68954	10.0716	23.0797	16.9033	26.0946	25.6223	15.9898	14.6009	7.45537	6.25837	12.2273	8.37802	31.5356	29.543	26.7383	14.9774	32.4578	31.6191	7.03703	5.81787	4.47333	4.34021
BnaA01g03800D	6.36802	5.8702	13.6422	10.9055	17.4248	15.3708	11.9197	10.5195	4.72986	7.13247	8.82213	10.0984	11.1646	10.963	17.9537	8.29118	13.3572	11.0049	0	4.58814	6.90295	7.45914
BnaA01g03810D	5.15746	3.18688	2.89018	2.15558	11.2624	12.0413	5.66777	7.95037	1.73968	2.37529	4.32289	3.58017	8.72911	12.0897	8.24237	6.24353	7.99516	8.39597	1.68536	1.51331	1.13471	0.629672
BnaA01g03820D	1.09996	0.802429	0	0	0	0	0.324763	0	0	0	0.330561	0	0.113433	0.132813	0.745032	0.677585	0.370222	0.105036	0	0	0	0
BnaA01g03830D	1.65497	1.85115	5.86706	19.7018	17.8059	14.7425	2.73629	3.71696	0	0	0	0	2.20712	2.78623	0.631178	0	51.9214	10.8393	0	0	0	0
BnaA01g03840D	31.3016	27.9452	90.4232	28.7715	189.167	128.214	242.432	185.642	7.13803	10.2211	0.717916	2.63871	256.37	126.748	155.624	48.6887	114.511	147.406	0	0	4.53879	3.47474
BnaA01g03850D	0	0	0	0	0	0	0	0	0	0	0	0	0.143574	0	0.172237	0.154824	0	0.145024	0	0	0	0
BnaA01g03860D	260.316	262.229	333.177	386.921	501.013	421.078	854.46	710.669	62.1835	74.2757	86.1128	37.6984	1077	922.3	992.795	606.859	1468.01	1182.5	40.9723	30.3062	0	0.439939
BnaA01g03870D	0	0	0	0	0	0.387032	0.271592	1.13902	0	0	0	0	0.163899	0	1.80256	0.512544	2.24263	0	0	0	0	0
BnaA01g03880D	8.68948	9.2848	5.15664	5.35914	9.54796	6.7464	11.0769	14.5132	1.00859	0.996972	0.228976	0.456378	13.1663	9.93141	16.0771	8.6549	20.4638	13.0091	0	0	0	0
BnaA01g03890D	0.811707	0.851089	5.33668	4.3524	5.41215	6.08692	3.84475	5.90392	0	0.170639	0	0.245932	2.02669	3.79926	1.378	1.11599	0.474143	2.26365	0.819676	0.212642	0	0
BnaA01g03900D	0	4.27643	0	0	0	0	0	0	0	0	0	0	7.52742	15.0942	5.63495	7.7596	0	0	0	0	0	0
BnaA01g03910D	0	0	0	2.01516	0	0	0	0	0	0	0	0	0	0	0	0	0	0	0	0	0	0
BnaA01g03920D	0	0	0	0	0	0	0	0	0	0	0	0	0	0	0	0	0	0	0	0	0	0
BnaA01g03930D	0	0	0	0	0	0	0	0	0	0	0	0	0	0	0	0	0	0	0	0	0	0
BnaA01g03940D	0	0	0	0	0	0	0	0	0	0	0	0	0	0	1.48953	0	0	1.34677	0	0	0	0
BnaA01g03950D	0	0.237088	1.50408	1.11376	2.12191	0.51224	0.71814	1.48041	0	0	0	0	0.482714	0.580473	0.266782	0.240016	0.252342	0.439543	0	0	0	0
BnaA01g03960D	0	0	0	0	0	0	0	0	0	0	0	0	0	0	0	0	0	0	0	0	0	0
BnaA01g03970D	0	0	0	0	0	0	0	0	0	0	0	0	0	0	0	0	0	0	0	0	0	0
BnaA01g03980D	0	0	0	0	0	0	0	0	0	0	0	0	0	0	0	0	0	0	0	0	0	0
BnaA01g03990D	0	0	0	0	0	0	0	0	0	0	0	0	0	0	0	0	0	0	0	0	0	0
BnaA01g04000D	11.9157	18.5714	6.9598	12.694	9.32562	11.8599	6.80287	10.6869	0.275227	0.133395	4.26861	0.201541	11.5311	19.6384	20.3702	8.68034	50.7945	6.61321	0.0747658	0	0	0
BnaA01g04010D	4.41678	9.4091	9.73606	3.70474	24.0343	28.7067	28.7509	25.3948	0.542574	0.54194	0.814863	0	26.6822	26.0114	8.29303	6.99903	22.7236	13.2395	2.33223	1.70873	0	0
BnaA01g04020D	0.0331234	0.0302973	0.414025	0.334637	0.807228	1.48143	0.932227	0.790882	0.644992	0.755143	0.471844	1.09762	1.64506	1.72361	0.762043	0.607999	0.462552	0.615478	0.606096	0.121393	0.241251	0.287723
BnaA01g04030D	7.07023	3.68527	6.79706	3.85265	6.17276	7.60504	6.85843	6.86547	1.12139	1.47654	2.1891	2.24746	12.0136	11.7523	17.6127	10.4108	6.12073	13.6954	0.30856	0.41934	0.238842	0.339374
BnaA01g04040D	0.719827	0	1.1582	0	0.653906	0	0.802675	0	0	0	0	0	0.522749	0.330863	1.3719	1.02582	0.291965	0.766362	0	0	0	0
BnaA01g04050D	0.156528	0.162617	0.163501	0.192148	0.383892	0	0	0	0	0	0	0	0.490452	0.193269	0.183645	0.483732	0.172622	0.458886	0	0.90303	0	0.423756
BnaA01g04060D	0	0	0	0	0	0	0	0	0	0	0	0	0	0	0	0	0	0	0	0	0	0
BnaA01g04070D	0.696076	1.52402	2.08888	0.9132	0.975282	1.79778	1.17344	1.7972	0	0	0	0	3.20614	0	4.00148	0.359235	0.776463	0.358292	0	0	0	0
BnaA01g04080D	0	0.403802	0	0	0	1.8931	0	0.610075	0	0	0	0	0.673384	0	1.84896	0.316234	0	0.324276	0	0	0	0
BnaA01g04090D	0	0	0	0	0	0	0	0	0	0	0	0	0	0	0	0	0	0	0	0	0	0
BnaA01g04100D	2.56217	2.545	6.57468	6.69776	9.45842	9.66974	8.02428	7.76255	0.618968	1.07449	0.875368	0.839721	9.06343	9.28407	7.72839	3.00171	11.8077	11.8498	2.10845	3.85146	2.10526	1.57643
BnaA01g04110D	1.155	0.998699	1.73269	0.842528	3.68593	5.92754	4.83892	5.19975	0.274894	0.133775	0.110806	0.104915	3.12376	0.852168	3.76472	2.01442	1.35753	3.29487	0.228844	0.177466	0	0.166444
BnaA01g04120D	11.461	2.71242	8.03114	5.96578	25.4897	33.0946	27.7889	24.721	0.781208	1.03101	0	1.20601	21.5006	25.1209	17.7066	13.5969	3.57405	23.3948	0	0	0	0
BnaA01g04130D	2.10676	2.59498	2.23292	1.72691	5.20433	5.71978	4.40873	4.3962	0.537862	0.259959	0.994245	0.876113	4.47244	4.9535	5.0411	3.33322	4.41	4.4221	0.579393	0.526992	0.16901	0.336786
BnaA01g04140D	0	0	0	0	0	0.154665	0.113642	0.116466	0	0	0	0	0	0	0	0	0	0	0	0	0	0
BnaA01g04150D	1.26189	0	0.696252	0.396827	1.6408	3.09576	2.03218	1.06375	0	0.497442	0	0	3.04937	0	0.71115	1.60242	0.676916	0	0	0	0	0
BnaA01g04160D	1.24673	0.946737	1.53365	0.550135	2.70284	1.93234	1.6764	1.70774	0	0	0	0	4.76479	6.01533	2.1917	1.45272	1.61185	3.49295	0	0	0	0.0803883
BnaA01g04170D	0.201555	0	0.199885	0	0.434287	0	0	0.617846	0	0	0	0	0.412892	0.789486	0	0	0.241564	0.418477	0	0	0	0
BnaA01g04180D	0	0	0	0	0	0	0	0	0	0	0	0	0	0	0	0	0	0	0	0	0	0
BnaA01g04190D	0	0	0	0	0	0	0	0	0	0	0	0	0	0	0	0	0.148283	0	0	0	0	0
BnaA01g04200D	4.99422	2.72517	4.34612	4.26829	8.24739	11.685	9.45019	10.2116	0.730082	0.613131	1.27752	0.266283	12.1533	11.8924	13.5254	8.90468	13.551	10.2646	1.45776	1.49744	0.27337	0.840595
BnaA01g04210D	0	0	2.39242	0.530864	9.75451	10.238	7.51481	5.0045	0	0	0	0	1.1923	0	1.37937	0.395488	0	0	0	0	0	0
BnaA01g04220D	0.504386	0.129651	0.438272	0.337252	1.69922	1.86953	1.03543	1.42242	0.0718724	0	0.151273	0.401529	1.04056	1.83699	0.828644	0.719876	1.21275	4.56985	0	0.0467485	0.0463212	0.0444313
BnaA01g04230D	0	0.141526	0	0	0	0	0	0	0	0	0	0	0	0	0.534351	0	0	0	0	0	0	0
BnaA01g04240D	0	0	0	0	0	0	0	0	0	0	0	0	0	0	0	0	0	0	0	0	0	0
BnaA01g04250D	0	0	0	0	0	0	0	0	0	0	0	0	0	0	0	0	0	0	0	0	0	0
BnaA01g04260D	0.866279	0	0	0	0	0	0	0	0	0	0	0	0	0	0	0	0	0	0	0	0	0
BnaA01g04270D	2.93081	1.33027	1.46498	1.782	7.6522	2.57866	3.71851	3.3769	1.60905	1.75438	0.751699	1.02684	9.61245	9.40776	6.79705	4.67334	1.95111	3.17702	0.317447	0.73911	0.606097	0.235003
BnaA01g04280D	2.68783	0.578293	1.81277	0.678038	0	0	0	0	0	0	0	0	3.63156	4.85554	5.38313	2.94035	0.464342	5.52022	0	0	0	0
BnaA01g04290D	0.280177	0.17959	0.60571	0.45963	0.949364	0.772681	1.02837	0.861167	0.281077	0.209642	0.109015	0.476834	1.07758	1.22213	1.3425	0.762105	0.341517	0.276092	0.118328	0.0392378	0.0391075	0.0554648
BnaA01g04300D	1.91499	1.65047	4.76495	3.41157	14.7932	16.7032	23.1144	15.2634	0	0	0	0	8.09695	7.74335	11.5934	6.75412	4.85693	2.74344	0	0	0	0
BnaA01g04310D	6.85569	6.54011	4.79786	6.22957	8.12779	4.19294	8.62084	9.12158	0	0	0	0	7.89933	5.92811	15.7833	10.8799	8.63786	6.54863	0	0	0	0
BnaA01g04320D	0	0	0	0	0	0	0	0	0	0	0	0	0	0	0.0795649	0	0.076663	0.0673334	0	0	0	0
BnaA01g04330D	0.0556896	0.0532003	0	0	0	0.115226	0.0876962	0	0	0	0	0	0	0	0	0	0.0634421	0.0558937	0	0	0.0507037	0.292717
BnaA01g04340D	12.346	9.16633	9.37888	6.89333	15.1417	18.9579	16.2957	16.601	0.519512	0.66674	0.748612	0.743822	19.4353	15.1624	21.5716	9.82015	14.5529	15.0017	0	0	1.14551	0.881971
BnaA01g04350D	0	0	0	0	0	0.141385	0.106533	0	0	0	0	0	0	0	0	0	0.078551	0	0	0	0	0
BnaA01g04360D	4.61177	1.2954	11.4652	8.38588	20.4666	18.3867	8.05083	7.35716	1.33495	1.20197	1.63797	2.69233	20.6368	18.211	18.118	13.4193	9.62819	16.2389	0.234785	0.0909121	0.630174	0.964433
BnaA01g04370D	0	0	0	0	0	0	0	0	0	0	0	0	0	0	0.0722412	0	0	0	0	0	0	0
BnaA01g04380D	2.20118	1.3975	2.24835	2.0319	2.83264	3.87687	4.35195	3.56609	0.668997	1.10716	1.69467	1.26881	2.88084	3.9199	2.50391	2.35688	2.92341	4.23491	1.55329	2.31866	0.629524	0.879491
BnaA01g04390D	1.85747	1.93797	2.41071	1.96973	3.87095	4.44393	4.2609	3.74268	0.279176	0.491778	0.909083	0.735674	3.66805	4.29638	4.59984	1.89153	3.93266	3.73079	0.400051	0.378143	0.292087	0.273716
BnaA01g04400D	0	0	0	0	0	0	0	0	0	0	0	0	0	0	0	0	0	0	0	0	2.01613	1.87486
BnaA01g04410D	0.42791	0	0	0	1.28144	0	1.41241	0	0	0	0	0	0.438422	1.77943	0.944059	0	0.494706	0	0	0	0	0
BnaA01g04420D	4.47515	5.39316	6.5061	3.91408	19.8637	21.633	23.9398	22.9187	0	0	0	0	5.89486	5.53063	7.87503	5.3566	3.39291	4.10263	1.16622	2.02715	0	0
BnaA01g04430D	7.59462	1.28446	5.57002	2.05608	21.1387	22.4856	2.12951	7.0193	0	0.425773	0	0	12.0143	14.8733	22.3554	12.5106	5.8368	12.1409	0	0	0	0
BnaA01g04440D	4.78095	5.27045	8.03274	7.32582	12.8786	9.93452	12.1446	14.5946	0	0	0	0	12.0568	12.4722	12.9243	4.17295	11.7126	5.97442	0.204671	0.236487	0	0
BnaA01g04450D	25.2501	47.6025	25.4798	20.5552	69.3534	42.8549	57.2359	52.8925	0	2.24934	0	0	37.2053	35.0418	56.2467	31.3394	43.4552	43.0811	0	0	0	0
BnaA01g04460D	3.30358	4.72033	6.79829	3.87344	7.72694	5.82752	5.49906	6.76598	0	0.189344	0.475164	1.17838	9.17754	11.5634	7.9938	5.7497	8.68579	7.35179	2.02653	3.97046	1.38085	1.75569
BnaA01g04470D	1.08809	1.48521	0.855452	0.779811	3.15251	5.94308	2.15759	2.17078	0.679511	0.445251	1.85079	0.743501	1.90283	1.26475	2.33376	1.6772	2.79637	2.13021	0	0	0	0
BnaA01g04480D	4.45732	4.16532	5.77104	4.02346	15.5974	15.8946	11.7086	10.8231	1.65416	1.03428	0.704387	1.65988	13.6218	12.7745	13.0673	7.76724	10.7754	12.8687	0.457225	0.140892	0.21113	0.362567
BnaA01g04490D	0	0	0	0	0	0	0	0	0	0	0	0	0	0	0	0	0	0	0	0	0	0
BnaA01g04500D	0	0	0	0	0	0	0	0	0	0	0	0	0	0	0	0	0	0	0	0	0	0
BnaA01g04510D	28.8357	51.5231	39.1386	39.6675	96.1145	93.0079	63.3819	54.3783	16.2916	19.8485	0	0	73.185	59.3556	51.7197	40.3427	77.4289	62.5533	0	0	7.63949	7.69775
BnaA01g04520D	3.8936	1.12755	5.45891	4.04113	5.35755	7.31184	7.96991	7.43445	2.02694	1.71549	1.39728	3.13358	12.9087	21.3241	21.3248	15.5632	7.3207	11.1199	0	0.521199	1.34623	1.39067
BnaA01g04530D	0	0	0	0	0	0	0	0	0	0	0	0	0	0	0	0.0527226	0	0.0503622	0	0	0	0.0467003
BnaA01g04540D	64.9456	48.8615	59.0457	30.0892	164.534	176.318	96.332	115.208	0	0	0	0	112.471	66.8198	86.6411	85.3147	58.1994	79.602	0	0	0	0
BnaA01g04550D	1.85164	0.908952	0.310357	1.05557	2.72671	3.38399	1.19996	3.51346	2.14239	2.1153	0	0.437662	7.54485	13.7736	7.66478	6.16735	11.2155	8.74644	0	0	1.02772	0.551892
BnaA01g04560D	0.0756985	0.0714042	0.939096	0.657411	0	0.151131	0.120013	0.242206	0	0	0	0	1.29785	1.32322	1.84234	1.23331	0.796009	1.7607	0	0	0	0
BnaA01g04570D	1.43658	0.580859	0.978251	1.44827	1.0333	1.01943	1.5482	1.96555	0	0	0	0	0.254382	0.789986	1.16932	0.26637	2.03075	1.03974	0	0.612892	0.361566	0.705749
BnaA01g04580D	0.615655	0.403136	0.943381	0.79312	0.526878	1.16968	0.342407	0.856295	0	0	0	0	1.2423	1.44401	1.948	1.30381	0.576036	1.41124	0	0	0	0
BnaA01g04590D	3.59262	2.32128	4.14516	3.45961	8.38787	6.70285	4.23396	4.70578	0.284526	0.208548	0.408577	0.836131	6.09469	8.06528	6.97289	3.76124	3.64025	6.16719	0.685685	0.849005	0.675864	0.345467
BnaA01g04600D	21.0741	19.8479	25.5469	24.159	52.3273	52.6772	39.8909	31.9911	6.17799	5.35913	8.43484	9.2285	57.3035	52.1515	64.4801	36.4497	79.8149	52.6121	4.02339	2.03264	2.3488	2.45639
BnaA01g04610D	3.96795	1.99756	7.97114	5.11173	7.0221	7.0241	10.602	10.9774	0.391963	0.378432	0	0	12.0309	10.8219	9.5924	7.62282	4.2769	10.9356	0.10227	0	0	0
BnaA01g04620D	22.2247	19.0728	39.3847	34.2188	77.7337	66.9567	44.6242	37.6414	1.69934	3.50214	0.355482	0.301868	68.3551	47.3871	84.1045	47.9034	26.2507	51.7899	7.54691	15.4191	0	0
BnaA01g04630D	0	0	0	0	0	0	0	0	0	0	0	0	0	0	0	0	0	0	0	0	0	0
BnaA01g04640D	0.667596	1.56225	1.33202	1.05961	2.66325	2.23087	1.98527	1.99027	0.0846484	0	0.0597144	0	2.68227	2.30962	1.20533	1.99781	2.7138	2.12126	0	0.384459	0	0
BnaA01g04650D	12.4691	48.5812	24.1401	30.2376	63.2183	56.8508	36.679	46.4145	0.297206	0.568675	0	0	38.0985	47.5777	56.8085	21.7182	195.545	95.5118	0.300759	0	0	0
BnaA01g04660D	5.73067	5.92471	8.05151	6.89076	17.1476	17.8181	13.8277	14.9804	3.42881	3.95176	3.1292	4.10858	17.7719	10.9202	28.9864	18.6561	21.3883	25.2319	0.149334	0	0	0
BnaA01g04670D	0.709858	0.710914	0.0502542	0.346516	0.644153	0.540357	0.256759	0.0871236	0.0863126	0.166285	0.21259	0	0.168822	0.402516	0.658694	0.40204	0.871836	0.493076	0	0.154521	0	0
BnaA01g04680D	0.5125	0.374298	0.581007	0.4287	2.8734	0.796697	2.2901	1.4685	0	0	1.14958	0.442163	4.52338	4.70517	4.25933	2.18872	3.35367	6.36093	1.00542	0	0	0
BnaA01g04690D	0	0	0	0	0	2.94248	0	0.939953	0	0	0	0	0	0	0	0.521546	0	0	0	0	0	0
BnaA01g04700D	11.1702	6.32645	3.8806	2.95805	19.4071	17.6001	19.7	15.9227	0.493203	0.117927	0	0	34.6904	36.7433	40.0767	23.9756	9.36213	10.9662	1.94908	0.353626	0.355676	0.730648
BnaA01g04710D	6.78208	6.85325	1.69108	1.6219	12.1645	2.54871	4.26748	4.36886	0	0	0	0	3.11136	1.41615	8.6745	3.4358	2.81635	8.07019	0	0	0	0
BnaA01g04720D	3.88591	1.46852	2.65917	1.95022	9.3848	10.9003	6.64974	5.50503	0.317212	1.59623	0.513572	0.975647	2.48683	9.78381	4.27095	2.04852	5.77573	5.56923	1.06328	0.411961	0	0
BnaA01g04730D	5.55588	5.25996	1.8418	1.77408	13.6175	14.1079	11.5993	13.2165	0.119987	0.457666	0.680859	0.182391	11.1159	9.35226	9.07008	4.88451	7.80233	2.3086	0.788019	0.62765	0	0
BnaA01g04740D	315.801	873.796	495.065	599.853	1537.79	1197.58	1124.29	1125.83	84.0273	123.945	11.7303	22.6627	585.745	619.84	1021.04	442.389	1195.22	506.442	2.51332	4.53084	62.2945	64.5768
BnaA01g04750D	1.21009	1.86044	1.70992	1.49697	6.16246	6.08317	4.63859	4.36594	0.656446	0.35005	4.74854	1.32297	3.39242	3.99875	4.67273	2.10517	2.55046	2.33404	0.583013	0.597748	0.113753	0.237455
BnaA01g04760D	5.23062	3.71099	2.73031	2.35701	6.27923	8.03166	5.6633	3.95544	1.48842	1.22738	4.35399	2.50683	6.86045	8.10843	5.26611	3.51368	5.85618	4.55973	0.0375794	0.521998	0.907111	1.46776
BnaA01g04770D	3.62375	3.68649	2.98634	2.46162	5.83582	7.71075	5.59044	6.41803	2.04576	0.932224	3.05251	2.28921	5.74967	6.48335	6.11949	2.83195	6.47496	5.06236	2.21448	1.38236	2.25536	1.23107
BnaA01g04780D	6.765	9.94848	4.74315	1.61528	12.5342	10.6912	10.0517	14.0024	0	0.406378	0	0	14.3328	6.57277	11.5578	7.70578	13.0702	14.0611	0	1.03449	0.77696	1.96022
BnaA01g04790D	17.4132	12.693	0.606491	0.341678	24.7304	26.759	43.691	42.4171	13.0677	16.2481	3.67041	11.0252	11.7964	0.696206	30.211	13.7026	0	0	0	0	0	0
BnaA01g04800D	2.33341	1.30879	3.50161	2.0162	7.31189	7.76294	4.17528	2.35715	0.186017	0.717727	0.405449	0.260957	3.29446	6.82755	3.09579	1.92406	6.51063	7.43387	0.383756	0.221309	0.658297	0.717834
BnaA01g04810D	0	0	0	0	0	0	0	0	0	0	0	0	0	0	0	0	0	0	0	0	0	0
BnaA01g04820D	0	0	0	0	0	0	0	0	0	0	0	0	0	0	0	0	0	0	0	0	0	0
BnaA01g04830D	0	0	0	0	0	0	0	0	0	0	0	0	0	0	0	0	0	0	0	0	0	0
BnaA01g04840D	2.85826	4.08628	3.69318	2.88797	9.73116	9.31151	6.16894	5.60307	1.20001	0.342306	1.16759	0.909973	5.52049	8.56262	8.71426	4.23036	5.10807	6.69162	0.0776415	0.846268	0.44697	0.693976
BnaA01g04850D	8.64826	11.4034	6.28082	5.27973	35.3434	31.4722	17.4361	15.447	0.469938	0.604212	1.93475	2.05686	27.3531	20.8685	34.9745	21.6487	8.03938	17.499	0	8.72208	0	0
BnaA01g04860D	1.73237	0.959414	2.13227	1.32551	4.49943	4.06342	4.60757	4.19067	0.128346	0.123111	0	0.0947599	4.02745	4.85287	4.51243	2.293	2.08624	3.3306	0	0	0	0
BnaA01g04870D	2.67398	4.07401	1.5498	2.34531	11.594	5.41565	3.81491	2.86512	2.82463	2.02047	6.61712	2.75436	4.40348	2.80895	4.8633	0.743995	3.14209	0.120793	2.08798	1.62261	1.64584	1.27664
BnaA01g04880D	3.60987	1.52225	1.5357	2.69981	1.39476	2.45507	1.81745	0.90453	0.292132	0.296629	1.03851	0	5.94028	6.44465	4.15678	1.73956	1.69948	1.32158	0.937371	1.46523	0.917784	0.681896
BnaA01g04890D	31.4587	26.0907	18.4335	17.4393	67.1744	54.7927	57.7605	61.1045	3.84645	1.62896	0	0	71.0998	64.2821	104.008	50.7979	59.6315	35.3913	0	3.55925	0	0
BnaA01g04900D	0.568797	0.116968	0.470215	0.399046	1.51416	1.78414	1.86783	1.93151	0	0	0.143932	0.413419	2.92827	2.72355	0.955243	1.08265	6.34603	2.7129	0	0.234962	0.23366	0
BnaA01g04910D	40.9474	43.6787	44.5415	31.209	110.911	113.187	127.605	105.58	2.39481	3.01424	1.44718	1.80978	105.307	130.111	110.919	73.6963	95.1814	137.598	1.24478	1.98328	4.05018	4.31189
BnaA01g04920D	167.167	172.826	212.736	236.723	529.944	552.892	208.714	243.05	213.885	273.668	35.8255	245.082	315.412	331.99	314.5	269.592	131.974	480.337	228.63	163.381	154.242	166.074
BnaA01g04930D	0	0.219542	0	0	0	0	0	0	0	0	0	0	0.207864	0.533775	0	0	0.228338	0	0	0	0	0
BnaA01g04940D	0	0	0	0	0	0	0	0	0	0	0	0	0	0	0	0	0	0	0	0	0	0
BnaA01g04950D	0	0	0	0	0	0	0	0	0	0	0	0	0	0	0	0	0	0	0	0	0	0
BnaA01g04960D	0	0	0	0	0	0	0	0	0	0	0	0	0	0	0	0	0	0	0	0	0	0
BnaA01g04970D	5.52525	3.76097	3.9836	2.68524	5.16705	9.02997	6.96319	6.02041	0	0.133584	0	0	9.75541	8.13886	8.25981	3.20712	3.51452	5.35655	0.0710251	0.250005	0	0
BnaA01g04980D	5.77015	8.94274	9.36238	7.90525	15.1927	14.6817	9.3465	8.08681	5.95148	4.99795	5.35921	8.03729	10.3533	15.3237	8.204	5.20041	7.87042	6.68654	6.39454	7.5872	3.70286	4.96116
BnaA01g04990D	0	0	0.0990743	0.438055	0	0	0	0	0	0	0	0	0	0	0	0	0	0	0	0	0	0
BnaA01g05000D	0	0	0	0	0	0	0	0	0	0	0	0	9.00753	0	10.342	23.2972	0	0.603595	0	0	0	0
BnaA01g05010D	0	0.0448971	5.72545	3.63716	2.91571	3.77704	4.93248	4.19693	0	0	0	0	1.48999	0.121312	7.00886	3.25256	6.74299	6.20881	0	0	0.141196	0.0444888
BnaA01g05020D	21.4915	9.34746	20.8608	11.4502	30.4581	30.5352	31.4975	28.8212	4.74448	1.66299	0	0.998696	41.5294	44.3359	25.7905	22.8429	13.8648	67.7372	0	0	0	0
BnaA01g05030D	0	0	0	0	0	0	0	0	0	0	0	0	0	0	0	0	0	0	0	0	0	0
BnaA01g05040D	3.16459	1.79279	1.5404	0.580517	1.07929	2.53307	0.846655	1.06039	0	0.210133	0	0	5.54241	5.62536	5.04396	1.80614	3.90588	7.12475	0	0	0	0
BnaA01g05050D	0	0	0	0	0	0	0	0	0	0	0	0	0	0	0	0	0	0	0	0	0	0
BnaA01g05060D	2.39581	1.47616	1.55719	0.517844	0	0	0	0	0	0	0.833052	0	0.610627	0	1.78647	2.01912	0.157137	0.137521	0	0	0	0
BnaA01g05070D	4.82443	2.97738	15.7914	11.7717	44.7248	57.9213	20.5442	22.4751	0.271096	0	0	0	23.5697	39.8877	25.2183	16.2806	12.8634	34.2178	0.148523	0	0	0.16266
BnaA01g05080D	13.121	12.0605	15.4815	13.1202	54.6762	51.8396	51.509	55.578	21.8864	23.7408	19.2271	33.6765	33.5724	47.8662	37.4969	22.6474	46.5938	58.9915	0.486196	1.04737	0.962276	1.67771
BnaA01g05090D	1.9146	1.57828	3.1479	3.26645	5.77944	8.75896	6.98449	5.35183	1.65838	2.54188	5.24532	2.45664	5.10086	2.82196	4.3538	2.33891	6.03836	5.58336	0	0	0	0
BnaA01g05100D	7.01755	6.09478	14.2006	8.82527	17.6437	25.4748	15.982	13.2912	9.39381	4.99792	5.15573	7.79084	13.002	11.8933	17.702	10.9832	13.1114	15.9266	4.31916	9.4231	5.92267	6.58068
BnaA01g05110D	15.9	16.4933	16.1419	13.9818	34.7196	19.3837	31.3503	30.0142	5.2443	7.79713	4.18519	5.42729	19.2387	22.9133	26.2258	12.2555	39.6783	28.7693	0	0.546745	0	0
BnaA01g05120D	0.416123	0.27555	0	0	1.47274	0.885898	0	0.224783	0	0	0	0	1.58913	2.31221	1.65227	0.581883	0	0.559491	0	0	0	0
BnaA01g05130D	26.3925	11.9394	67.3302	40.9114	42.8425	60.5092	45.0174	41.2453	24.34	23.3312	2.68523	19.211	83.1807	90.1583	113.252	85.0003	23.9675	81.5975	2.38149	7.95118	0	0.174202
BnaA01g05140D	0.546528	0.73911	1.01726	1.13526	0.417636	1.12578	0.664357	1.35826	0	0.111057	0.254121	0.497181	1.71447	2.1162	1.59447	1.59321	1.86401	1.71124	0.245556	0.142911	0	0
BnaA01g05150D	0	0	0	0	0	0	0	0	0	0	0	0	0	0	0	0	0	0	0	0	0	0
BnaA01g05160D	0	0	0	0	0	0	0	0	0	0	0	0	0	0	0	0	0	0	0	0	0	0
BnaA01g05170D	0	0	0	0	0	0.641619	0	0	12.2452	14.9798	4.52165	5.12009	0.763851	0.627003	0.850277	0.99798	0.531745	0.24112	0	0	0	0
BnaA01g05180D	0.15679	0.342193	0	0	0	0	0	0	0	0	0	0.214199	0	0	0	0	0	0	0	1.21271	0	0
BnaA01g05190D	5.26013	2.93366	9.22084	4.82881	8.3821	11.6233	0	0	0	0	0	0	3.97231	2.15123	10.3276	3.96871	13.5388	6.41857	0	0	0	0
BnaA01g05200D	0	0	0	0	0	0	0	0	0	0	0	0	0	0	0	0	0	0	0	0	0	0
BnaA01g05210D	0	0	0	0	0	0	0	0	0	0	0	0	0	0	0	0	0	0	0	0	0	0
BnaA01g05220D	16.4848	5.18901	11.1839	7.49934	20.3761	24.2197	1.00788	1.86459	2.68762	1.49689	1.82584	4.2702	27.6684	47.457	37.4842	27.9904	13.1891	50.2247	0.224854	0.19735	0.262722	0.246953
BnaA01g05230D	3.77494	2.95623	3.51951	3.56126	7.55281	11.655	3.37227	1.76064	2.29174	4.14292	0.247963	0	9.02173	11.5269	10.8478	5.83646	7.43943	7.57559	0	0	0	0
BnaA01g05240D	3.35832	2.64641	10.1584	10.0509	2.74895	3.37161	0	0	0	0	0	0.0522672	4.66591	7.03617	2.06979	0.964022	7.33617	7.54298	0	0	0	0
BnaA01g05250D	0	0	0	0	0	0	0	0	0	0	0	0	0	0	0	0	0	0	0	0	0	0
BnaA01g05260D	0	0	0	0	0	0	0	0	0	0	0	0	0	0	0	0	0	0	0	0	0	0
BnaA01g05270D	1.44191	0.310669	2.7763	1.43139	1.14092	2.07438	0.167538	0.349204	0.662918	0.630964	0	0.587363	3.46034	2.94457	1.81247	1.17551	2.41758	2.67405	0.171354	0.100475	0.100633	0.0946925
BnaA01g05280D	0.747016	0.363897	0.552513	0.723541	0.79638	0.990304	0.444904	0	0	0.144656	1.04014	0.358443	3.83175	0.931917	0.111641	0.594263	1.61949	0.474166	0	0	0	0
BnaA01g05290D	1.06381	1.8097	0	0	0	0.675159	0.46653	0.466841	0	0	0	0	0.293014	0.72837	0.949474	0.279444	0.31658	0.824289	0	0	0	0
BnaA01g05300D	14.2159	13.2157	8.07769	5.52068	14.1619	14.478	3.73267	3.02328	3.67344	2.59605	3.602	4.60604	22.8737	33.1535	11.0077	7.30951	36.0473	35.1772	0	0	0	0.0523849
BnaA01g05310D	0	0	0	0	0	0	0	0	0	0	0	0	0	0	0	0	0	0	0	0	0	0
BnaA01g05320D	15.7994	14.1823	30.8691	27.5535	56.8797	35.6978	2.75192	1.91839	5.85403	6.11248	1.46438	1.65297	37.7587	51.784	53.7851	28.6832	59.1124	41.0422	3.46774	1.57381	0.665534	0.372259
BnaA01g05330D	0	0	0	0	0	0	3.05873	0	1.06977	1.14108	1.56733	0.846955	0	0	0	0	0	0	0	0	0	0
BnaA01g05340D	0	0	0	0	0	0	0	0	0	0	0	0	0	0	0	0	0	0	0	0	0	0
BnaA01g05350D	0	0	0	0	3.07744	1.92206	2.02942	4.25808	2.18273	1.41749	1.53594	5.67203	0	0	0	0	0.494046	0	0	0	0	0
BnaA01g05360D	0	0	0	0	0	0	0	0	0	0	0	0	0	0	0	0	0	0	0	0	0	0
BnaA01g05370D	2.19944	4.29394	3.51881	1.21903	2.63709	6.06601	0.187303	0	0	0.186903	0	0.298837	5.50298	5.73017	4.26154	1.583	8.03757	5.99731	0	0	0	0
BnaA01g05380D	21.309	20.113	18.083	16.6348	26.4809	35.0838	3.09881	2.59588	1.87733	1.64641	2.46044	1.01209	38.6954	29.1507	42.4596	26.4253	38.12	33.9524	4.32858	0.476229	7.68849	7.93323
BnaA01g05390D	103.996	91.642	181.542	106.964	706.008	763.72	0.879566	1.71657	0	4.70409	0	0	178.653	291.555	218.846	172.037	64.0137	148.544	0	8.4308	0	0
BnaA01g05400D	0.993244	0	0	1.74185	0	0	0	0	0	0	0	0	0	0	0	0	6.71286	0	0	0	0	0
BnaA01g05410D	43.7312	72.3697	345.118	206.567	1916.15	1499.28	0	0.883145	7.81435	11.9634	0.815938	0.827028	672.797	989.842	583.743	179.181	568.267	317.385	84.3443	6.22222	2.69053	3.29662
BnaA01g05420D	0	0	1.12494	0	2.82191	0	0	0	0	0	0	0	3.33705	2.15175	0.952123	3.35567	1.87352	4.05198	0	0	0	0
BnaA01g05430D	0.343487	0	0.938597	1.55482	0	0	0	0	0	0	0	2.91115	0.746452	0	0	0.716249	0	0	0	0	0.789757	0.385491
BnaA01g05440D	0	0	0	0	0	0	0	0	0	0	0	0	0	0	0	0	0	0	0	0	0	0
BnaA01g05450D	0.785981	1.71056	2.09309	2.42977	5.14507	4.23804	0	0.0648946	0.196265	0.252412	0.307086	0.194396	2.28925	2.68909	3.40592	1.00782	19.1193	3.93245	0.455954	0	0.0809337	0.268885
BnaA01g05460D	0	0	0	0	0	0	0	0	0	0	0	0	0	0	0	0	0	0	0	0	0	0
BnaA01g05470D	0	0	0	0	0	0	0	0	0	0	0	0	0	0	0	0	0	0	0	0	0	0
BnaA01g05480D	6.74525	6.0872	5.75244	2.74938	8.72707	3.64962	1.61794	1.00549	2.27999	2.82779	2.10706	2.43162	12.6127	12.0394	9.27413	8.32642	8.01089	12.9356	0.616058	0	0.353024	0
BnaA01g05490D	2.99637	3.22446	3.0955	3.43986	7.19345	7.13083	0.13326	0.138654	0.264525	0.318011	0.255831	0.224162	6.40059	5.38653	7.20228	3.23561	7.92245	7.34894	0.563078	0.465959	0.19803	0.293817
BnaA01g05500D	2.51391	2.97229	1.54492	1.53168	3.965	4.53034	0	0.258531	0.258641	0.530372	0.339316	1.06023	2.45449	3.16376	3.08371	1.40168	1.52695	1.96707	1.06395	1.94041	0.173547	0.676916
BnaA01g05510D	1.46129	1.4226	2.08572	1.50694	4.44045	5.4645	2.47982	2.1736	1.4085	1.48967	1.08777	1.66884	4.40631	5.07118	4.84687	2.9005	3.66649	4.64071	0.462177	0.381813	0.464641	0.214612
BnaA01g05520D	0	0	0	0	0	0	0	0	0	0	0	0	0	0	0	0	0.095295	0	0	0	0	0
BnaA01g05530D	13.1989	7.49236	11.212	6.97363	13.8365	21.076	2.04808	2.86551	5.50942	5.63435	7.58011	6.9456	18.2053	16.3315	24.1332	11.3933	15.5705	20.9337	2.87861	4.53738	4.5137	3.68
BnaA01g05540D	11.5707	9.06871	10.9574	9.39764	15.5654	16.7049	0	0	1.08725	2.1384	1.21482	1.78749	18.5625	12.042	18.4932	6.02755	15.1078	17.3486	4.6914	1.8234	5.44542	4.34753
BnaA01g05550D	1.62775	1.41607	2.92203	1.12902	1.63684	1.08601	0	0	0	0	0	0	2.1119	2.88763	2.18898	2.646	0.525261	1.61379	0.188964	0.657807	0.21974	0.627441
BnaA01g05560D	2.04255	1.6993	1.43922	2.27476	3.22429	2.64139	0	0	0	0	0	0	1.98726	3.31945	3.21659	0.986358	3.12683	3.21309	0.108648	0.254004	0	0
BnaA01g05570D	0.695361	0.871815	0.432456	0.255038	0.974137	1.98834	0	0	0	0	0	0	1.29799	1.66751	1.61855	0.232137	0.998991	1.34612	0	0	0	0
BnaA01g05580D	0	0	0	0	0	0	0	0	0	0	0	0	0	0	0	0	0	0	0	0	0	0
BnaA01g05590D	0	0	0	0	0	0	0	0	0	0	0	0	0	0	0	0	0	0	0	0	0	0
BnaA01g05600D	0	0	0	0	0	0	0	0	0	0	0	0	0	0	0	0	0	0	0	0	0	0
BnaA01g05610D	11.3794	5.53493	12.328	8.70072	16.9811	17.1671	16.5726	12.0736	11.6385	9.61426	5.5971	11.4597	15.216	11.9834	14.1849	9.17768	11.3472	17.1492	8.95755	9.72825	5.35224	7.71347
BnaA01g05620D	7.43391	9.82468	14.2039	10.6672	29.581	27.213	31.2193	27.0009	3.66268	2.40832	3.98006	4.24311	27.4015	37.3499	30.9282	19.6343	25.1486	20.2727	0.843609	0.53484	1.51833	1.50028
BnaA01g05630D	0	0	0	0.0844772	0	0	0	0	0	0.119799	0.392478	0	0.081351	0	0	0	0.530833	0.0769695	0	0	0	0
BnaA01g05640D	0	0	0	0	0	0	0	0	0	0	0	0	0	0	0	0	0	0	0	0	0	0
BnaA01g05650D	0	0	0	0	0	0	0	0	0	0	0	0	0	0	0	0	0	0	0	0	0	0
BnaA01g05660D	10.5508	9.61326	7.66542	5.58391	13.1443	13.9421	14.423	9.9797	1.30262	0.758735	1.47194	0.799329	14.3155	18.1015	17.3469	8.0391	19.5655	11.2681	0	0.16411	0	0
BnaA01g05670D	15.6393	15.5436	17.3038	14.5858	21.6298	19.2613	32.1823	28.2834	3.76751	2.67257	13.1807	2.1562	33.0956	38.2402	30.5608	20.0406	35.1515	42.6304	0.173181	2.51453	5.05278	5.07005
BnaA01g05680D	0	0	0	0	0	0	0	0	0	0	0	0	0	0	0	0	0	0	0	0	0	0
BnaA01g05690D	8.59521	3.15437	13.8498	11.4738	9.8185	13.7531	17.0654	16.0612	4.79976	4.17333	3.20713	4.50127	21.2529	18.8778	24.3254	13.8696	18.8127	20.7156	3.27862	4.13174	2.22137	1.87671
BnaA01g05700D	0	0	0.204375	0	0	0	0	0.293619	0	0	0	0	0	0	0	0	0	0.368267	0	0	0	0
BnaA01g05710D	0	0	0	0	0	0	0	0	0	0	0	0	0	0	0	0	0	0	0	0	0.328761	0
BnaA01g05720D	82.6509	129.822	48.2973	60.1196	64.3397	54.8914	96.3619	95.158	25.281	28.0876	1.48777	4.42517	70.8804	82.9387	121.586	45.7576	160.581	73.8631	0	1.83063	45.5799	35.0105
BnaA01g05730D	0.686007	0.209091	0	0.244708	0.487509	0.936312	0.614932	0.650782	0	0	0	0	0.586547	0.44997	0.622163	0.18959	1.37382	0.514168	0	0	0	0
BnaA01g05740D	0	0	0	0	0	0	0	0	0	0	0	0	0	0	0	0	0	0	0	0	0	0
BnaA01g05750D	0	0	0	0	0	0	0	0	0	0	0	0	0	0	0	0	0	0	0	0	0	0
BnaA01g05760D	0.184896	0	0.838643	0	0	0	0	0	0	0	0	0	0	0	0	0	1.4689	0.182098	0	0	0	0
BnaA01g05770D	0.263021	0.324007	1.04754	0.368023	1.61871	2.01598	1.18654	0.664117	0	0	0	0	0.220515	0.598553	0.732916	0.219062	0.314102	0.686076	0	0	0	0
BnaA01g05780D	14.4657	14.6422	10.2126	2.82459	12.2934	7.30959	8.70703	1.96756	0	0	0	0	26.8289	20.202	30.694	20.0784	19.5197	10.7507	0	0	0	0
BnaA01g05790D	0	0	0	0	0	0	0	0	0	0	0	0	0	0	0	0	0	0	0	0	0	0
BnaA01g05800D	0.577752	0.595174	1.21053	1.19798	0.998088	0.996006	0.571171	0.581641	0	0	0	0	1.01949	1.9989	0.853245	0.129103	0.971928	1.21715	0.332278	0	0	0
BnaA01g05810D	2.04964	1.05113	1.63642	1.28346	3.77134	2.87645	2.8637	3.59957	0	0	0	0	3.17589	2.92095	4.21357	2.13866	1.83335	2.60268	0.36218	0	0	0
BnaA01g05820D	7.74293	6.88125	2.33919	2.0968	12.6639	12.079	8.3434	9.52739	0.161696	0.158161	0.125961	0.614717	7.80318	2.74559	12.9851	12.017	3.70156	2.89043	0.0866211	0	0	0
BnaA01g05830D	0.431513	0.797637	3.48043	2.62754	7.61982	5.47073	1.5535	2.00793	0	0	0	0	2.47018	1.41565	5.00074	1.95341	1.17046	1.03451	0	0	0	0
BnaA01g05840D	2.00103	4.04378	16.3913	16.4315	16.8924	17.0709	9.49053	8.44902	0.459221	0.438031	5.72407	1.12954	11.5772	12.0223	11.9792	10.1399	49.0322	23.444	0.115933	0	0	0
BnaA01g05850D	0	0	0	0	0	0	0	0	0	0	0	0	0	0	0	0	0	0	0	0	0	0
BnaA01g05860D	0	0	0	0	0	0	0	0	0	0	0	0	0	0	0	0	0.739869	0	0	0	0	0
BnaA01g05870D	0	0	0	0	0	0	0	0	0	0	0	0	0	0	0	0	0	0	0	0	0	0
BnaA01g05880D	0	0	0	0	0	0	0	0.753285	0	0	0	0	0	0	0	0	0	0	0	0	0	0
BnaA01g05890D	13.7716	23.7337	17.7362	9.38704	40.2882	47.1443	18.3747	16.2126	0	0	0	0	13.1001	7.65709	17.3188	8.38135	4.14456	5.19868	0	0	0	0
BnaA01g05900D	0.742873	0.129067	8.29077	5.37908	16.8282	13.3216	1.41366	3.28493	0	0	0	0	14.6013	7.54241	18.4901	13.4261	18.7277	13.2724	0.104963	0	0	0
BnaA01g05910D	0	0	0	0	0	0	0	0	0	0	0	0	0	0	0	0	0	0	0	0	0	0
BnaA01g05920D	0.0779342	0.161107	20.5225	15.3227	32.9459	32.7083	22.7114	16.4366	2.71581	3.49788	3.01144	5.41055	27.0242	15.0696	14.8588	9.5547	18.9729	15.6156	2.44213	0.66658	1.67602	1.56585
BnaA01g05930D	0	0	0	0	0	0	0	0	0	0	0	0	0	0	0	0	0	0	0	0	0	0
BnaA01g05940D	0	0	0	0	0	0	0	0	0	0	0	0	0	0	0	0	0	0	0	0	0	0
BnaA01g05950D	16.5131	13.0547	25.0658	19.5159	38.0128	38.0294	24.0374	22.4977	4.0907	3.61376	3.0251	5.03981	21.7555	36.16	15.4192	10.2459	21.2095	22.0421	14.45	9.29253	14.9135	11.8173
BnaA01g05960D	5.86227	4.39602	0.670477	0.238241	7.31223	3.61374	3.65648	2.18721	0.315945	0.31434	0	2.63039	2.6403	4.56163	1.55053	0.788196	0.888599	2.3243	0	0	0	0
BnaA01g05970D	0	0.0315178	0.0628937	0.0361241	0	0.0696193	0	0.0542085	0	0	0	0.0450269	0	0.0794717	0	0	0.0360703	0	0	0	0.127557	0.0297559
BnaA01g05980D	3.11217	6.44029	1.19041	0.660502	2.23396	1.95125	2.53386	2.37493	0.360692	0.560299	0.541229	0.135626	11.941	12.4106	4.33589	1.44445	9.90222	2.76881	0	0.118428	0.115559	0.113664
BnaA01g05990D	4.18584	1.50523	8.87015	6.25025	8.34072	9.7162	7.29482	7.08258	3.71942	3.584	1.76418	3.86649	8.50485	11.3063	9.82686	8.05042	6.11382	12.0424	0.613231	0.680703	1.30043	1.22257
BnaA01g06000D	2.11552	1.2085	3.08334	2.46672	3.87368	4.55599	4.65843	5.99483	0	0.133931	0	0	6.03481	5.86915	5.00922	5.43861	2.1347	1.88803	0.579823	0.758488	0	0
BnaA01g06010D	21.7601	10.877	27.3126	18.362	41.321	48.5641	34.3204	34.5514	11.3293	9.76472	4.82164	15.0349	30.8903	31.18	43.5007	27.4464	18.2326	38.5172	6.36697	6.70551	3.41498	3.3474
BnaA01g06020D	6.51671	3.9208	6.06464	4.49572	5.6967	4.55171	5.62982	5.07202	0	0	0	0	11.7966	10.9738	10.6737	4.66293	11.5874	8.62463	1.31657	2.46369	0	0
BnaA01g06030D	2.43877	1.69814	7.88449	5.85026	8.40046	9.42889	3.29693	2.89193	0	0	0	0	6.74053	3.24894	7.8654	4.32021	8.60811	5.94737	0	0	0	0
BnaA01g06040D	6.86943	11.0032	0.414539	0.473718	12.274	24.0263	7.28382	4.36513	5.31067	2.33887	16.6222	6.39941	13.9941	22.5365	12.6126	7.62498	25.8821	5.55818	0	0	0	0
BnaA01g06050D	0.173206	0	0.353697	0.131826	0	0	0	0	0	0	0	0.0684967	0	0	0	0	0	0	0	0	0	0
BnaA01g06060D	0	0	0	0.0820185	0.149212	0	0	0	0	0	0	0	0	0	0	0	0	0.0727458	0	0	0	0
BnaA01g06070D	0	0	0	0	0	0	0	0	0	0	0	0	0	0	0	0	0	0	0	0	0	0
BnaA01g06080D	0	0.0882427	0	0	0	0	0	0	0	0	0	0	0	0	0	0	0	0	0.12679	0	0.0492	0.0458198
BnaA01g06090D	0	0	0.717505	0.580806	0.213817	0	0.170024	0	0.348292	0.168836	0	0.376923	0.553711	2.57822	0	0	0.491033	2.4096	0	0.103335	0	0
BnaA01g06100D	16.6158	16.5964	29.755	25.8688	61.0686	67.765	40.6723	43.7638	4.97754	4.14599	16.9845	10.4023	34.2382	43.8262	50.3903	28.1924	37.2338	34.6315	3.39771	2.63533	5.14097	4.95164
BnaA01g06110D	0.495842	0.509784	0.350945	0	0.38832	0.369003	0.268222	0.273535	0.275467	0	0	0	1.37466	1.91446	0.392945	1.07976	0.195693	0.516026	1.02135	0.339445	0.338411	0.488975
BnaA01g06120D	0.123859	0.0604857	0	0	0.249669	0.491037	0.299048	0.100563	0	0	0.141461	0	0.350718	0.401127	0.229891	0.275669	0	0.382452	0.0582794	0	0	0
BnaA01g06130D	7.96302	13.2088	12.7269	11.4492	22.6862	27.5243	15.2243	22.6051	7.81794	3.53412	1.1075	2.02758	26.3534	26.5976	17.3785	10.2169	20.5983	16.4755	3.22375	3.01276	5.18172	4.68496
BnaA01g06140D	0.450164	0.52923	0.608264	0	0	1.22303	1.46191	0.755402	0	0	0	0	0.924729	0	4.80081	2.80713	1.08103	0	0	0	0	0
BnaA01g06150D	0	1.04549	0.209033	0.235625	2.24472	0.902287	0.649878	1.34478	0	0	0.547876	0	1.65621	0.771426	3.0677	1.49267	0.230049	0	0.168085	0.58829	0.581147	0.38348
BnaA01g06160D	3.57709	5.41952	3.82379	3.5376	9.68376	11.8493	6.80141	7.40177	1.79183	0.747726	0.949661	0.916712	16.5193	8.09011	30.0033	13.6739	27.6885	23.4393	0	0	0	0
BnaA01g06170D	2.10384	0.921209	2.51336	1.09949	2.90616	3.82039	0.74084	0.759619	0.477006	0.475835	0.231264	0.403127	5.01401	3.79188	2.48772	1.23797	0.827655	1.58571	2.49623	2.17876	1.47444	0.962393
BnaA01g06180D	23.9367	49.1271	18.0572	21.9075	14.1346	10.0762	7.23113	12.9417	0.170474	0	0	0	12.2528	9.91182	9.92913	9.05561	24.973	11.9143	6.85279	7.72255	3.39059	4.42694
BnaA01g06190D	27.2804	21.3891	100.269	69.9691	78.2424	80.0282	100.086	89.8526	3.56228	4.22108	1.84934	5.48865	111.395	157.071	73.4377	47.6653	65.7958	70.921	1.52795	1.53299	3.84093	2.96255
BnaA01g06200D	0	0	0	0	0	0	0	0	0	0	0	0	0	0	0	0	0	0	0	0	0	0
BnaA01g06210D	7.85623	3.81838	19.8631	11.3763	8.27845	7.98619	9.79638	9.9275	0.309497	0	0	0	7.84825	13.8861	9.99029	9.86667	6.16258	13.8479	0.165308	0	0.574375	0
BnaA01g06220D	15.7706	12.8571	53.0227	43.3025	96.8442	92.319	140.224	127.624	21.0624	24.1481	6.48866	16.8675	66.1718	62.1634	133.2	87.433	93.3733	159.453	2.8107	3.08931	7.83075	8.02225
BnaA01g06230D	2.71794	1.76372	12.1188	6.84298	0	2.01251	4.52035	4.00038	0	0	0	0	7.27975	11.0527	16.3323	8.55769	7.19204	12.4962	0.748892	2.64002	2.60944	0.428944
BnaA01g06240D	4.8444	4.87232	17.1699	12.6571	12.6182	12.7496	5.50189	3.63725	0.912176	0.955995	0.65985	0.673626	6.74982	18.0226	8.66936	3.90141	12.0019	9.96151	5.07807	7.32539	4.50865	1.97509
BnaA01g06250D	16.2968	9.00486	12.5959	10.1402	28.6761	34.5221	18.5888	16.6036	1.15855	0.870645	0.411836	1.83532	25.3867	37.6209	30.1217	20.1616	23.0565	36.9828	3.6475	2.15888	2.31673	2.15274
BnaA01g06260D	0	0	0	0	0	0	0	0	0	0	0	0	0	0	0	0	0	0	0	0	0	0
BnaA01g06270D	4.32089	2.07545	1.36188	2.60205	1.71527	4.75859	2.68341	0	0	0	0	0	5.6229	3.88604	1.68839	1.7289	1.60988	2.56517	0	0	0.188363	0
BnaA01g06280D	0	0	0	0	0	0	0	0	0	0	0	0	0	0	0	0	0	0	0	0	0	0
BnaA01g06290D	0	0	0	0	84.3096	121.617	24.2923	25.1541	16.05	17.6325	13.9389	43.2896	0	0	0	0	0	0	0	0	0	0
BnaA01g06300D	0	0.117829	0	0.40807	0	0.237323	0	0	0	0	0	0	0.394359	0	0.2858	0.126731	0.425901	0	0	0	0	0
BnaA01g06310D	3.18389	4.268	6.26845	5.05084	8.71014	8.7414	14.2888	14.9753	0.280897	0.476638	0.155739	0.250669	10.3026	10.3205	17.3705	12.824	11.4076	10.7558	0.220179	0.169755	0.254303	0.599373
BnaA01g06320D	0.0993015	0	0	0	0	0	0	0	0	0	0	0	0	0	0	0	0	0	0	0	0	0
BnaA01g06330D	18.8762	15.4368	37.0189	31.8382	35.5759	29.1053	28.4584	24.3488	6.81436	7.44669	10.2114	11.2083	27.0828	28.4637	22.1661	14.1808	23.3984	26.3205	0.990614	1.82819	1.12994	1.66634
BnaA01g06340D	1.26013	2.07402	1.16093	1.28687	1.88613	2.64231	1.75633	2.36456	0.109002	0.210134	0.394457	0.370737	2.53547	2.43	4.23137	2.36456	3.49821	2.81539	0	0	0	0
BnaA01g06350D	6.37271	5.05073	1.82657	1.01783	4.99263	2.73127	3.4346	4.649	0.625365	0.121543	0.101454	0.386434	4.49109	7.69601	7.0427	4.34605	3.82179	4.79458	0	0	0	0
BnaA01g06360D	0	0	0	0	0	0	0	0	0	0	0	0	0	0	0	0	0	0	0	0	0	0
BnaA01g06370D	0.515447	0.891867	1.09961	0.8762	1.94776	2.06763	1.53602	1.72543	0	0	0	0.0392487	0.591731	1.34328	0.368452	0.39514	1.3892	1.55449	0.0267736	0.0620962	0	0.0292081
BnaA01g06380D	2.40058	0.758128	3.86991	2.41455	1.96782	2.12566	4.82394	7.84397	1.25945	1.37431	0.113764	2.77616	6.00117	3.96349	18.5988	13.8324	4.00637	17.1468	0	0	0	0
BnaA01g06390D	0	0	0	13.2305	0	0	4.73002	14.5554	0	0	0	0	7.63428	0	14.8143	4.99441	5.90742	10.7569	0	0	0	0
BnaA01g06400D	0	0	0	0	0	0	0	0	0	0	0	0	0	0	0	0	0	0	0	0	0	0
BnaA01g06410D	0	0	1.11794	0	0	0	0.406798	1.67539	0	0	0	0	0.515558	0	1.16484	1.0595	0	0.796197	0	0	0	0
BnaA01g06420D	0	0	1.29892	0.966656	0	0	3.14145	9.63368	0	0	0	0	1.59923	0	6.34125	4.06986	2.69527	4.43247	0	0	0	0
BnaA01g06430D	0	0.14657	0.0979479	0.0549231	0	0	0.164459	0.0827996	0	0.328531	0.318823	0.0619699	0.0564267	0	0	0.0579028	0.0632826	0.110038	0	0	0.0522903	0
BnaA01g06440D	0	0	68.1411	46.4696	0	0.465199	128.343	130.779	0	0.344975	0	0	76.3793	0.282082	130.54	98.6097	50.8343	130.345	0	0	0	0
BnaA01g06450D	0	0	0	0	0	0	0	0	0	0	0	0	0	0	2.01054	0	0	0	0	0	0	0
BnaA01g06460D	13.6789	3.28923	9.36797	5.87299	16.3798	19.8809	16.8275	22.3033	0.130602	0.383543	0	1.09174	13.8394	27.9437	9.84963	6.72133	8.41646	34.6876	0	0	0	0
BnaA01g06470D	0	0	0	0	0	0	0.294621	0	0	0	0	0	0	0	0	0	0	0	0	0	0	0
BnaA01g06480D	0	0	0	0	9.25033	7.18034	6.82503	3.39404	0	0	0	0	20.1838	2.80904	43.4436	22.2473	37.6208	9.8332	0	0	0	0
BnaA01g06490D	685.197	1401.18	710.206	685.821	1532.25	1157.52	1038.56	1140.17	32.9884	3.4913	0	0	2670	2166.12	1946.24	1103.2	5213.24	3009.35	0	0	0	0
BnaA01g06500D	0	0	0	0	0	0.409524	0.580678	0	0	0	0	0.236972	0	0	0.21615	0	0.415313	0.366812	0	0	0	0
BnaA01g06510D	0	0	0	0	0	0	0	0	0	0	0	0	0	0	0	0	0	0	0	0	0	0
BnaA01g06520D	2.04692	8.76392	3.60628	2.52775	4.75905	6.76478	2.61156	1.30012	0	0	0	0.468879	8.75286	6.80781	12.2044	5.97688	9.03099	6.1197	0	0	0	0
BnaA01g06530D	14.6842	20.0416	17.8069	11.6987	23.3373	22.3085	21.7588	18.4619	7.15213	6.60823	9.342	7.49175	15.706	14.3038	9.78541	5.74573	16.2834	19.9525	8.76894	5.17421	3.70391	3.32432
BnaA01g06540D	33.9466	31.9858	65.17	44.485	2.76739	2.71335	21.95	16.8746	10.86	17.6096	44.9955	34.2722	12.9135	0.941771	1.34858	0.78409	11.924	0.925256	40.9309	24.377	10.5533	6.16039
BnaA01g06550D	0.29761	0.43621	0	0	0	0	0.471373	0.729074	0	0	0	0	0	0	0	0	0.514098	0	0	0	0	0
BnaA01g06560D	0	0	0	0	0	0	0	0	0	0	0	0	0	0	0	0	0	0	0	0	0	0
BnaA01g06570D	0.733594	1.27394	3.03028	0.891817	1.84181	1.16524	3.05488	1.91726	1.6054	0	1.52504	0.623734	2.43227	2.90941	0.569629	0.516016	1.72653	0.760874	1.3188	0.7669	0.730373	2.73019
BnaA01g06580D	0	0	0	0	0	0	0	0	0	0	0	0	0	0	0	0	0	0	0	0	0	0
BnaA01g06590D	0	0	0	0	0	0	0	0	0	0	0	0	0	0	0	0	0	0	0	0	0	0
BnaA01g06600D	2.43878	12.8034	11.4159	9.80016	0	0	8.35967	3.89745	3.14101	6.46483	0	0	20.4843	24.9181	9.38482	1.93838	14.411	11.7183	38.056	47.4339	21.8548	17.4869
BnaA01g06610D	10.551	8.40863	6.72142	6.28342	15.7542	14.8583	22.092	25.2413	12.1472	9.61984	5.07989	5.57737	10.9674	9.26123	9.68691	4.26646	12.0384	12.7402	2.52841	0	5.11481	5.74231
BnaA01g06620D	0.238504	0	0	0	0	0	0.395379	0.396041	0	0	0	0	0	0	0	0	0.539082	0.234018	0	0	0	0
BnaA01g06630D	0	0	0	0	0	0	6.2012	2.52858	0	0	0	0	3.92386	0.781135	0	0	1.41938	0.154395	0	0	0	0
BnaA01g06640D	6.84888	5.90301	5.39454	3.49978	14.5057	11.5365	13.4566	14.5742	0	0	0	0	7.23197	12.1006	7.14981	5.0152	4.50246	7.90246	0	0	0	0
BnaA01g06650D	0	0	0	0	0	0	0	0	0	0	0	0	0	0	0	0	0	0	0	0	0	0
BnaA01g06660D	2.36103	0.628528	4.8993	0	32.0414	21.8914	12.8241	5.17141	0	0	0	0	21.8035	11.598	8.90746	2.87212	1.94476	9.76255	0	0	0	0
BnaA01g06670D	1.76148	1.38925	4.35463	2.72846	5.71977	4.21254	5.23401	4.05587	1.09463	0.960321	3.16388	1.94299	3.70882	4.53989	4.03421	2.07047	8.56702	3.41549	0	0.0654513	0.386324	0.125538
BnaA01g06680D	5.62302	3.89373	4.10744	2.72262	4.81255	2.49992	2.17581	2.24896	0.635818	0.437735	0.330431	0.739067	5.13349	6.05076	4.71485	3.73134	3.855	4.08319	0.0468488	0.0550715	0.559184	0.35744
BnaA01g06690D	4.128	3.4597	1.23648	0	0	0	3.2917	0	0	0	0	0	0	0	1.14729	1.88602	0	0	0	0	0	0
BnaA01g06700D	3.9372	4.60866	18.2383	12.9986	3.71097	2.77847	1.59913	1.62995	0.751205	0.858962	2.67516	0.877274	6.25081	4.90986	10.1983	4.8012	8.47675	4.82644	2.47823	4.18901	3.15216	3.78898
BnaA01g06710D	0	0	0	0.529577	0	0	0	0	0	0	0	0	0	0	0	0.37941	0	0	0	0	0	0
BnaA01g06720D	0	0	0	0	0	0	0	0	0	0	0	0	0	0	0	0	0	0	0	0	0	0
BnaA01g06730D	0.178581	0	0	0	0.430726	0	0	0	0	0	0	0	0	0	0.424396	0.746572	0	0.879558	0	0.187482	0.745398	0
BnaA01g06740D	0.168758	0	0	0	0	0	0	0	0	0	0	0	0	0	0	0	0	0	0	0	0	0
BnaA01g06750D	7.53382	6.26414	0.745611	0	8.91332	9.21075	7.85699	5.61713	0	0.288108	0.661441	0	1.31343	0.453062	1.8816	0.185514	6.18638	9.90354	0.162138	0	0	0
BnaA01g06760D	2.99217	4.39928	1.44918	1.9832	6.10229	6.87158	8.78339	9.11333	0.850508	0.392387	0	0.793028	8.74604	7.70158	7.71333	2.3373	5.16547	3.66405	0	0	0	0
BnaA01g06770D	1.5861	1.33246	2.32953	1.71814	3.4958	4.56674	1.60218	2.01976	0.133523	0	0	0	2.2817	0.723884	2.67171	1.94	1.14399	1.69484	0	0	0	0
BnaA01g06780D	3.20567	3.76283	4.18279	2.82301	8.64094	13.5861	7.68186	3.11144	0	0.252943	0	0	5.30813	2.68593	5.90624	3.16823	8.97663	3.24137	0	0	0.156194	0
BnaA01g06790D	1.04281	0.243046	2.79261	2.62897	8.32711	4.95676	3.22781	3.02891	0	0	0	0	3.12482	5.10961	2.66634	1.96182	1.8701	6.00499	0	0	0	0.217874
BnaA01g06800D	0.690224	0.278748	9.76932	7.15429	11.6445	9.38076	10.0515	8.02645	4.98584	3.28262	9.61983	1.89207	9.21621	4.46559	5.11375	3.66721	6.40274	3.80286	0	0	0	0
BnaA01g06810D	4.05476	5.26925	3.3403	3.37407	7.72733	6.85561	4.11515	6.30022	0	0.0906176	0	0.198279	6.55429	8.64737	5.98863	3.35232	11.7994	7.1882	0	0	0	0
BnaA01g06820D	57.6705	60.6785	66.0615	66.0297	95.7444	96.3201	101.332	93.3916	8.77198	8.06148	7.6997	8.80318	133.951	128.324	154.276	96.78	153.348	146.718	4.10643	4.9201	5.6931	5.63697
BnaA01g06830D	0	0	0	0	0	0	0	0	0	0	0	0	0	0	0	0	0	0	0	0	0	0
BnaA01g06840D	0	0	0	0	0	0	0	0	0	0	0	0	0	0	0	0	0	0	0	0	0	0
BnaA01g06850D	5.72958	3.77278	6.20772	4.41414	9.31571	11.5411	6.14993	4.48525	1.60479	1.92817	2.22923	2.36033	8.68545	4.99117	10.118	6.50818	4.65008	4.39149	0	0	0	0.0370254
BnaA01g06860D	2.21009	0.576342	2.3173	1.4842	1.17168	1.43585	0.893014	1.08055	0.0354814	0.10255	0	0.0243975	2.11353	3.82748	5.89312	3.94902	0.442072	2.09023	0	0	0.172701	0.123356
BnaA01g06870D	0.284389	0.391977	0.604082	0.333208	0.839034	0.820213	1.08927	0.154928	0	0	0.236334	0.117522	1.55168	1.38614	0.574965	0.410318	0.337799	0.982044	0	0.105094	0	0
BnaA01g06880D	1.22561	0	1.41293	0	1.24141	0	1.65127	0.851124	0	0	0	0	2.19193	0.656642	2.11175	0.542245	0.298067	1.03766	0	0	0	0
BnaA01g06890D	0	0.0498317	0.098885	0	0	0	0	0	0	0	0	0	0	0	0	0	0	0	0	0	0	0
BnaA01g06900D	0.561222	0	0.705639	0.455674	0.212061	0.61605	0.461426	0.46525	0	0	0	0	0.211582	0	0.344785	0.201795	0.224174	0.0947251	0	0	0	0
BnaA01g06910D	0.834719	1.00021	0.922475	0.903165	3.11886	3.61282	0.954529	0.489462	0.1192	0	0	0	3.4239	2.44016	3.74569	3.74463	3.63014	2.3491	0	0.0722379	0.290611	0.540111
BnaA01g06920D	0	0	0	0	0	0	0	0	0	0	0	0	0	0	0	0	0	0	0	0	0	0
BnaA01g06930D	0	0	0	0	0	0	0	0	0	0	0	0	0	0	0	0	0	0	0	0	0	0
BnaA01g06940D	9.21231	11.7654	6.56992	6.01897	12.2163	14.9354	10.3264	12.4338	0.545688	0.793986	0.720665	0.824596	13.7875	14.4389	19.4048	11.0701	20.1091	17.4244	0	0.497375	0.545411	0.903061
BnaA01g06950D	0	0	0	0	0	0	0	0	0	0	0	0	0	0	0	0	0	0	0	0	0	0
BnaA01g06960D	0	0	0	0	0	0	0	0	0	0	0	0	0	0	0	0	0	0	0	0	0	0
BnaA01g06970D	2.85978	1.2074	1.8774	1.22279	1.86534	1.9902	2.12196	2.16734	0	0	0	0	3.45007	2.23099	3.30357	2.78578	1.54012	2.40744	0	0	0	0
BnaA01g06980D	0	0	0	0	0	0	0	0	0	0	0	0	0	0	0	0	0	0	0	0	0	0
BnaA01g06990D	7.30924	10.8052	4.91676	3.98408	3.93071	7.17679	7.58809	8.13853	0	0.324528	0	0	6.44335	4.41638	8.02968	3.25299	5.51988	5.96038	0	0	0	0
BnaA01g07000D	2.05457	2.77028	1.53908	2.11266	2.19338	3.26435	3.23298	3.36954	0	0	0.0715037	0.067038	3.14867	1.68956	2.68304	1.19669	4.11009	2.041	0	0.0512498	0	0.0479987
BnaA01g07010D	1.50633	1.39152	1.36843	0.986958	1.49092	1.22228	0.311867	0.419887	0	0	0.0357003	0	0.488675	0.756575	0.397225	0.410263	0.768422	0.725406	0	0.152439	0.114361	0.173582
BnaA01g07020D	0	0.160872	0.171287	0	0	0	0.239602	0	0	0	0	0	0	0	0	0	0.1746	0	0	0	0	0
BnaA01g07030D	0	0	0	0	0	0	0	0	0	0	0	0	0	0	0	0	0	0	0	0	0	0
BnaA01g07040D	0	0	0	0	0	0	0	0	0	0	0	0	0	0	0	0	0	0	0	0	0	0
BnaA01g07050D	0.924901	2.47216	14.04	8.45382	12.7081	14.1334	0	0.254425	0	0	0.206027	0	18.537	6.1655	33.4296	21.6703	0.181068	0.95308	0	0	0	0.150324
BnaA01g07060D	3.45288	1.29782	5.11073	2.80188	8.13555	8.62476	0	0.226965	0	0	0	0	7.04496	10.1483	7.74287	4.15281	0	0	0	0	0	0
BnaA01g07070D	0	0	0	0	0	0	5.33835	2.87101	0	0	0	0	0	0	0	0	9.08104	5.86314	4.00529	4.49594	4.24541	5.82422
BnaA01g07080D	0	0	0	0	0	0	0.602403	0.310654	0	0	0	0	0	0.243348	0	0	1.08607	1.91806	0	0	0	0
BnaA01g07090D	5.42526	0	0	0	0	0	0	0	0	0	0	0	2.35731	0	2.8138	0	0	0	0	0	0	0
BnaA01g07100D	1.15741	0.950426	1.34006	1.02307	2.39269	2.35547	1.40261	1.6796	0.443811	0.301209	2.04873	0.489206	2.55235	3.26853	3.14203	1.36782	1.76764	1.1488	0	0	0	0
BnaA01g07110D	12.1789	6.01884	13.9907	10.5191	41.9476	33.3287	10.8475	12.1386	0	0	0	0	30.4948	26.7669	42.8718	33.2477	15.5788	15.8547	0	0	0	0
BnaA01g07120D	1.0957	0.434321	1.78092	1.10221	0.946165	2.32479	1.42096	1.62109	0.3676	0.884122	0.822414	1.33275	2.02295	5.21433	1.62287	1.55895	2.26031	2.99595	0	0	0	0
BnaA01g07130D	1.98279	0	0	3.03193	17.1809	5.87313	8.11572	9.87699	0	1.61238	0	0	3.72951	2.58498	3.40396	2.0392	9.79188	1.96625	0	0	0	0
BnaA01g07140D	6.87538	4.23091	11.9614	11.6871	15.1994	11.0416	6.96544	4.57869	0	0.159793	0	0	30.9313	26.6603	39.2303	22.4255	4.46857	26.8692	0	0	0	0
BnaA01g07150D	6.51852	3.11862	13.2003	5.98725	9.55867	11.9994	14.2289	13.8641	1.10107	0.807703	0	0	17.967	19.2107	18.9547	14.235	8.64332	8.62369	0	0	0	0
BnaA01g07160D	0.272706	2.65634	0.539219	2.17195	1.28259	0.587684	1.74899	4.86641	0	0	0	0	6.46554	4.93865	3.99335	2.06293	3.17287	1.11563	0	0	0	0
BnaA01g07170D	23.5859	15.2602	13.8962	10.1448	10.0332	15.327	23.84	23.5057	0	0.198776	0.168912	0.15773	22.9717	18.6196	28.1899	15.1661	14.9917	11.6862	0	0	0	0
BnaA01g07180D	0	0.0991167	0.0988321	0	0	0	0	0	0	0	0	0	0	0	0	0	0	0	0	0	0	0
BnaA01g07190D	1.3244	1.51316	1.72658	1.75001	3.59864	4.00743	2.8334	1.76486	0.197049	0.335379	0.321298	0.345532	3.60135	3.45467	3.85796	2.99106	3.62862	2.95924	0	0.0317708	0	0
BnaA01g07200D	2.45471	2.41542	1.66155	1.10913	1.11139	0.738722	2.29134	2.34631	1.5886	1.68844	0.498279	0.292907	3.29478	1.48262	2.66039	2.18341	2.83386	2.88327	4.77043	5.78031	3.0951	4.21527
BnaA01g07210D	0.18233	0	0.197567	0	0.417526	0.205105	0.764424	1.26618	0	0	0	0.125908	0.406848	0.242362	0	0	0.880133	0.87035	0	0	0	0
BnaA01g07220D	3.18185	1.75147	4.89681	3.97938	6.55235	6.89142	7.76922	6.81837	0	0	0	0	7.39934	6.75234	7.62841	2.50171	2.9329	5.55938	0	0.0831249	0.0834469	0.233861
BnaA01g07230D	0	0	0	0	0	0	0	0	0	0	0	0	0	0	0	0	0	0	0	0	0	0
BnaA01g07240D	17.6926	19.9	0.0919117	0.739524	15.1877	14.4041	3.44975	1.98411	0.149552	0.291424	0	2.51821	19.5019	1.38759	0.555422	4.07796	0.858106	11.1714	0.157086	0	0	0
BnaA01g07250D	0	0	0	0	61.9859	56.7443	2.11745	2.20659	0	0	0	0	25.2713	1.58187	1.06411	5.0996	0	2.3473	0	0	0	0
BnaA01g07260D	0	0	0	1.19069	81.4199	83.3919	6.1847	0	0	0	0	0	47.323	2.06942	2.56498	5.61858	0.862433	8.44353	0	0	0	0
BnaA01g07270D	4.67641	5.90309	4.83223	1.96171	20.3979	19.016	10.2809	6.90703	0	0	0	0	11.6036	8.81068	11.5426	6.67665	4.80938	14.2718	0	0	0	0
BnaA01g07280D	3.53734	9.05012	11.3272	12.7617	13.48	15.8501	14.0005	14.2243	2.26152	1.47407	3.43524	2.07359	9.30521	7.96997	11.1167	7.08131	24.4871	8.07605	0	0	0	0
BnaA01g07290D	12.0469	10.1665	19.7453	15.2822	42.5333	26.8508	14.0446	15.5225	0	1.41495	0	2.34217	23.7102	25.3824	12.7146	8.4771	23.1224	19.1145	0	0	0	0
BnaA01g07300D	0	0	0	0	0	0	0	0	0	0	0	0	0	0	0	0	0	0	0	0	0	0
BnaA01g07310D	0	0.174817	0	0	0	0	0	0	0	0	0	0	0	0	0	0	0	0	0.145956	0	0	0
BnaA01g07320D	1.15112	1.22732	0	0	3.00555	1.07301	1.00422	2.7158	0.173494	0	0	0	1.76703	1.32973	1.02381	0.456459	1.47314	1.07091	0	0	0	0
BnaA01g07330D	1.51084	7.577	5.45337	3.37215	13.5552	18.0733	5.10954	5.88683	0	0	0	0	20.904	9.27303	5.87438	3.57019	2.88315	4.37362	0	0	0	0
BnaA01g07340D	23.4647	8.9095	12.1931	8.20749	38.0607	44.118	38.2343	39.2469	1.82331	1.25014	1.71119	5.06864	17.4175	15.0518	51.2107	33.0941	14.7695	30.3151	2.11255	2.45393	10.0954	4.82604
BnaA01g07350D	1.49934	0.769812	1.37599	1.1478	5.98198	6.32781	31.7213	32.5741	0	0	0	0.105935	8.80483	3.53003	11.4257	7.10807	4.28103	4.15184	0.0791071	0	0	0.0874884
BnaA01g07360D	60.7314	56.6058	88.6746	46.1511	130.423	136.257	139.123	162.335	33.2685	22.3588	33.5266	56.6236	116.722	92.9865	103.294	67.1376	79.6141	129.89	0	0	0	0
BnaA01g07370D	0	0	0	0	0	0	0	0	0	0	0	0	0	0	0	0	0	0	0	0	0	0
BnaA01g07380D	0	0	0	0	0	0	0	0	0.51421	0	0	0	0.321625	0	0	0	0	0	0	0	0	0.300023
BnaA01g07390D	0	0	0	0	0	0	0	0	0	0	0	0	0	0	0	0	0	0	0	0	0	0
BnaA01g07400D	0	0	0	0	0	0	0	0	0	0	0	0	0	0	0	0	0	0	0	0	0	0
BnaA01g07410D	0.222273	0	0	0	0	0	0	0	0	0	0	0	0	0	0	0	0	0	0	0	0	0
BnaA01g07420D	1.06503	1.04973	1.03294	0.7711	1.04596	0.723222	1.07621	1.03585	0.183318	0.121452	0.361838	0.0439019	1.8467	2.38134	2.30014	1.90731	3.15788	2.90122	0.31273	0.161943	0.245249	0.265057
BnaA01g07430D	7.4881	6.25427	10.3356	7.60676	27.8761	27.3363	26.2865	24.0991	0	0	0	0	8.34567	17.8926	23.5707	6.0408	8.08292	10.8623	0	0	0	0
BnaA01g07440D	0.446888	0.423498	0.207937	0.120423	0.69477	0.923327	0.353288	0.180452	0.18014	0	0	0	1.47899	0.414285	0.672011	0.845672	1.67039	0.455301	0	0	0	0.0936775
BnaA01g07450D	192.106	128.194	135.831	93.0862	373.46	433.535	181.315	229.495	3.76811	6.68019	0	3.83216	228.184	298.545	261.884	211.072	78.1353	303.623	0.808947	2.21371	4.99559	5.51985
BnaA01g07460D	12.7217	15.2925	38.501	25.6268	28.233	38.6443	32.6282	30.7186	6.9918	9.04933	6.15093	17.4273	23.9653	27.0249	29.3707	17.5209	9.93694	14.0623	5.57875	6.39754	11.5237	11.2827
BnaA01g07470D	0	0	169.311	126.788	0	0	56.31	57.7865	0	1.58856	0	0	0	0	0	0	0.991477	0.895535	0	0	1.00231	2.07427
BnaA01g07480D	1.83997	1.22868	2.41798	2.1065	4.69766	4.78627	3.41879	2.78349	1.09088	1.3464	2.55957	2.4674	3.52051	3.80606	3.46355	1.92244	5.13202	3.95315	1.66663	1.35024	1.03846	1.32106
BnaA01g07490D	0	0	0	0	0	0.31169	0.25056	0.254927	0.258715	0.49462	0.721598	0.26792	0	0	0	0	0.468225	0	0.131336	0.0759897	0.0747738	0.146202
BnaA01g07500D	0	0	0	0	0	0	0	0	0	0	0	0	0	0	0	0	0	0	0	0	0	0
BnaA01g07510D	0	0	0	0	0	0	0	0	0	0	0	0	0	0	0	0	0	0	0	0	0	0
BnaA01g07520D	0	0	0	0	0	0	0	0	0	0	0	0	0	0	0	0	0	0	0	0	0	0
BnaA01g07530D	0	0	0	0	0	0	0	0	0	0	0	0	0	0	0	0	0	0	0	0	0.54488	0
BnaA01g07540D	13.7951	11.2515	8.06608	5.13468	20.5219	23.5719	24.3069	17.7531	5.71443	5.46175	7.34041	6.96107	58.1807	50.4481	35.9556	23.2184	19.3798	20.8896	1.08504	0.209741	0.206355	0.206276
BnaA01g07550D	13.5654	8.41304	11.6466	10.8469	5.95506	8.24066	16.0696	22.7902	0.560993	0.362064	0	0.161445	23.1846	26.1731	20.4465	11.5614	6.93645	17.1212	0	0	0	0
BnaA01g07560D	0	0	0	0	0	0	0	0	0	0	0	0	0	0	0	0	0	0	0	0	0	0
BnaA01g07570D	0	0	0	0	2.34805	0	0.635312	1.90553	0	0	0	0	0	0	0	0	0.443968	0	0	0	0	0
BnaA01g07580D	0	0	0	0	0	0	0	0	0	0	0	0	0	0	0	0	0	0	0	0	0	0
BnaA01g07590D	0	0	0	0	0	0	0	0	0	0	0	0	0	0	0	0	0	0	0	0	0	0
BnaA01g07600D	0.249216	0.180799	0.187502	0.103051	0.581117	0	0.416549	0.423604	0.279297	0.140647	0.105839	0	0.186029	0.218379	0.700101	0.274753	0.385465	0.250562	0	0	0.292975	0.0922979
BnaA01g07610D	9.90428	9.90492	5.93716	5.04075	19.7487	23.4461	21.7494	21.9615	8.2429	8.68042	12.5681	9.84809	22.6033	22.7135	30.4879	19.0968	28.8633	22.0711	2.21428	2.92398	4.86986	3.58824
BnaA01g07620D	0.798601	0.855971	0.849799	0.975464	0	0.562082	0.640864	0.546918	0	0	0	0	1.46677	0.750832	1.51375	1.27324	4.07474	2.12724	0	0	0	0
BnaA01g07630D	0.104184	0	0	0	0	0	0	0	0	0	0	0	0	0	0	0	0	0	0	0	0	0
BnaA01g07640D	23.9413	17.9695	14.5008	11.7506	67.818	55.8198	41.2236	42.3827	8.63341	6.51393	3.7693	9.57201	15.3089	12.5256	15.7884	14.6604	16.3502	8.48577	0.780454	0.921225	1.77201	0
BnaA01g07650D	0	0	0	0	0	0	0	0	0	0	0	0	0	0	0	0	0	0	0	0	0	0
BnaA01g07660D	0.691871	1.01528	0.636172	0.309228	0	0	0.934595	0.934855	0	0	0	0	1.72019	1.88414	2.13132	1.76991	2.0281	1.14258	0	0	0	0
BnaA01g07670D	0.360268	0.691177	0	0.409648	0	0	0	0	0	0	0	0	0.640839	0.845421	0.819602	0	0.372136	0.337043	0	0	0	0
BnaA01g07680D	0	0	0	0	0	0	0	0	0	0	0	0	0	0	1.2688	0	0	0	0	0	0	0
BnaA01g07690D	8.59425	10.6921	12.2784	9.19243	19.3868	17.626	10.8575	10.5424	1.73568	0.978835	0.758368	1.17043	16.2604	20.954	24.4168	10.8622	15.9902	17.1265	4.62429	4.74544	2.83622	3.98386
BnaA01g07700D	0	0	0	0	0	0	0	0	0	0	0	0	0	0	0	0	0	0	0	0	0	0
BnaA01g07710D	0	0	0	0	0	0	0	0	0	0	0	0	0	0	0	0	0	0	0	0	0	0
BnaA01g07720D	2.86382	2.35681	1.93306	2.00956	0	0	0	0	4.32615	2.85972	1.09217	3.34699	0	0	0	0	0	0	1.00858	1.76996	8.56564	7.02953
BnaA01g07730D	0	0	0	0	0	0	0	0	0	0	0	0	0	0	0	0	0	0	0	0.123451	0.248456	0.352735
BnaA01g07740D	0	0	0	0	0	0	0	0	0	0	0	0	0	0	0	0	0	0	0	0	0	0
BnaA01g07750D	15.1208	10.4035	17.989	12.7997	1.95123	2.96815	1.06286	1.84331	19.5298	17.8094	5.44533	28.6889	0.934345	1.34379	1.51153	0.99318	0.690138	3.2783	13.9247	15.9724	36.372	41.3726
BnaA01g07760D	0	0	0	0	0	0	0	0	0	0	0	0	0	0	0	0	0	0	0	0	0	0
BnaA01g07770D	0	0	0.286252	0.106864	0	0	0	0	0	0	0	0	0	0	0	0	0	0	0.251062	0.982871	0	0.0939353
BnaA01g07780D	0	0	0	0	0	0	0	0	0	0	0	0	0	0	0	0	0	0	0	0	0	0
BnaA01g07790D	0	0	0	0	0	0	0	0	0	0	0	0	0	0	0	0	0	0	0	0	0	0
BnaA01g07800D	0	0	4.20779	1.94226	0	0	0	0	0	0	0	0	0	0	0	0	0	0	4.62257	7.71257	1.26212	3.05024
BnaA01g07810D	29.279	31.1679	24.221	14.3106	120.722	79.733	46.3601	57.3077	10.9916	24.9848	14.3924	27.5548	26.2063	22.0915	36.4873	6.27268	21.8003	26.2116	39.369	33.2365	15.4043	21.2589
BnaA01g07820D	4.05926	8.86269	7.01862	9.08698	16.1346	8.27847	15.6672	17.1096	3.90801	0.9471	9.02605	1.34296	7.4657	5.32331	9.83213	7.04295	24.167	7.59817	1.57926	0.819255	1.60203	0.39413
BnaA01g07830D	44.4795	46.5989	80.1855	63.4778	270.321	267.356	235.148	215.863	11.0492	11.4692	7.5034	10.9826	179.443	222.563	226.426	137.846	155.163	311.326	0.371803	0.595345	0.536588	0.455523
BnaA01g07840D	0	0	0	0.184056	0	0	0	0	0	0	0	0	0	0	0	0	0.0977381	0	0.0741613	0	0.170767	0
BnaA01g07850D	0	0	0	0	0	0	0	0	0	0	0	0	0	0	0	0	0	0	0	0	0	0
BnaA01g07860D	13.2769	12.4701	54.6791	34.1883	48.6058	48.0689	91.9136	83.6897	5.01528	3.31412	7.43365	4.25669	59.4838	70.1585	35.5902	26.6712	40.4707	44.947	9.15894	8.63057	6.63091	8.09655
BnaA01g07870D	0	0	0	0	0	0	0	0	0	0	0	0	0	0	0	0	0	0	0	0	0	0
BnaA01g07880D	0	0	0	0	0	0	0	0	0	0	0	0	0	0	0	0	0	0	0	0	0	0
BnaA01g07890D	0	0	1.04417	0	59.1925	18.7104	2.69544	4.11339	0	0	0	0	6.20566	27.1036	0	0	0	0	0	0	0	0
BnaA01g07900D	25.07	19.02	2.2364	0	65.1439	47.3176	25.2249	22.9129	0	0	0	0	65.0216	24.089	54.3208	23.8075	4.41987	39.9573	0	0	0	0
BnaA01g07910D	11.302	9.85504	8.99198	6.63622	18.3309	19.05	24.3686	16.557	1.20912	1.51061	5.37831	4.79125	10.0087	4.13176	18.3929	10.6958	8.74184	14.2494	5.36948	3.67763	5.44119	6.36118
BnaA01g07920D	0.326352	0.273363	0.344883	0.463499	3.04399	3.45854	2.89302	2.73791	0	0.110757	0.0908335	0	1.94202	2.45774	1.36621	0.901515	1.19443	0.968229	0.062068	0	0.145162	0
BnaA01g07930D	3.23067	1.70143	2.8164	0.536859	5.79252	5.6924	4.61694	3.7687	0	0.241532	0	0	6.91299	10.1916	8.8306	6.20499	1.20243	9.51137	0.261346	0	0.151578	0.14335
BnaA01g07940D	2.61384	1.52535	2.95	2.51506	8.02754	9.38138	5.91051	3.97687	0.149306	0	0	0.483984	6.23451	7.42631	6.83998	2.80524	4.86695	6.56451	0.384982	0.531769	0.266171	0.165281
BnaA01g07950D	2.01907	0.533288	3.27629	3.6731	13.5222	15.5692	15.9433	12.8149	6.89466	6.45175	0	6.70584	6.37588	12.1579	5.13564	3.33107	2.34625	8.69302	0	0	0.234848	0.494669
BnaA01g07960D	8.05463	1.9783	13.171	6.67588	38.4109	41.68	29.0816	22.5636	1.61139	1.45288	0.0856009	2.82968	26.1071	27.4619	28.8035	18.2225	2.75097	22.5107	0.0852523	0.0987839	0.29722	0.500976
BnaA01g07970D	0	0	0.14072	0.15852	0	0	0	0	0	0	0	0	0	0	0	0	0.160318	0	0	0	0	0
BnaA01g07980D	6.83484	9.65947	6.63036	4.09292	15.6114	11.481	9.26054	8.79432	0	0.142306	0	0	17.557	9.71226	12.0456	11.4416	6.32574	8.79213	0.0823466	0.0958041	0	0
BnaA01g07990D	0	0	0	0	0	0	0	0	0	0	0	0	0	0	0	0	0	0	0	0	0	0
BnaA01g08000D	0	0	0	0	0	0	0	0	0	0	0	0	0	0	0	0	0	0.648234	0	0	0	0
BnaA01g08010D	0	0	0	0	0	0	0	0	0	0	0.127688	0	0	0	0	0.111982	0.243493	0	0	0	0	0
BnaA01g08020D	3.99605	4.08115	0.715232	0.337179	2.32824	0.830946	1.43317	0.815562	0	0.325299	0.231811	0	2.31216	1.55896	2.99988	1.1966	1.05962	1.22504	0	0	0	0
BnaA01g08030D	0	0	0	0	0	0	0	0	0	0	0	0	0	0	0	0	0	0	0	0	0	0
BnaA01g08040D	0	0	0	0	0	0	0	0	0	0	0	0	0	0	0	0	0	0	0	0	0	0
BnaA01g08050D	2.92868	3.3834	3.51075	1.50687	6.11217	6.44709	2.58639	3.48341	0	0.430784	0.629917	0.619833	7.25703	3.3983	4.77336	2.62148	3.14185	4.95762	0	0	0	0.273073
BnaA01g08060D	0.520672	0.611763	0	0	0	0	0	0	0.432035	0.876562	0	2.28377	1.16148	3.20449	3.82857	1.10629	0	0	0.924197	1.35534	0.79302	0.789952
BnaA01g08070D	0	0	0	0	0	0	0	0	0	0	0	0	0	0	0	0	0	0	0	0	0.216646	0
BnaA01g08080D	0	0	0	0	0	4.6861	0	0	2.18666	0	0	1.87022	0	0	0	0	20.5289	73.3105	0	0	0	0
BnaA01g08090D	0	0	0	0	0	0	0	0.134452	0	0	0	0	0.172006	0.100428	0	0	0	0	0	0	0	0
BnaA01g08100D	0	0	0	0	0	0	0	0	0	0	0	0	0	0	0	0	0	0	0	0	0	0
BnaA01g08110D	0	0	0	0	0	0.273852	0	0	0	0	0	0	0	0.48285	0	0	0	0	0	0	0	0
BnaA01g08120D	23.0496	43.0963	22.164	27.0489	17.0533	13.1245	15.9615	18.9716	3.49958	2.61757	0	0.398641	23.1437	14.5266	20.7492	21.9639	74.392	26.7711	0.905265	2.28385	13.3191	8.40425
BnaA01g08130D	7.65272	11.6553	15.3912	11.0329	36.0871	26.0271	23.9671	20.2368	2.15833	1.66704	3.86145	0.694407	22.3361	34.4256	15.7139	7.96838	27.5071	30.8554	3.37808	3.6792	3.16285	5.00846
BnaA01g08140D	1.56128	2.56794	2.77674	2.15357	4.13636	3.11486	3.10342	3.54428	0.0734711	0.14429	0.05743	0	4.53121	4.57046	3.86187	2.33024	5.39584	4.66433	0	0.0954532	0.0962264	0
BnaA01g08150D	273.256	361.03	299.549	234.621	946.919	712.47	977.351	1063.58	58.2137	75.9355	4.00248	13.2757	675.264	625.292	652.984	297.304	693.605	573.341	0	1.61266	0.537514	0
BnaA01g08160D	107.081	114.979	91.7116	86.8542	170.495	167.093	150.913	176.912	4.45558	2.86985	1.38281	2.67626	123.919	168.607	185.781	104.74	181.538	192.768	0	0	0	0
BnaA01g08170D	0.810216	1.27916	0.212489	0	0.464896	0.47578	0	0	0	0	0	0	0	0	0.135662	0	0	0	0	0	0	0
BnaA01g08180D	0	0	0	0	0	0	0	0	0	0	0	0	0	0	0	0	0	0	0	0	0	0
BnaA01g08190D	0	0	0	0	0	0	0	0	0	0	0	0	0	0	0	0	0	0	0	0	0	0
BnaA01g08200D	2.60609	2.9081	2.93704	2.34234	6.04138	5.48493	6.05102	5.97187	0.792567	1.12282	1.94609	1.28084	5.53832	3.51067	7.38206	4.07884	8.6091	6.05402	0.151169	0.156818	0.13772	0.310817
BnaA01g08210D	0.564878	6.91465	2.67638	0	0	0	0	0	0	0	0	0	5.47184	0.825316	1.32744	0	0.682882	0	0	0	0	0
BnaA01g08220D	0	0	0	0	0	0	0	0	0	0	0	0	0	0	0	0	0	0	0	0	0	0
BnaA01g08230D	0	0	0	0	0	0	0	0	0	0	0	0	0	0	0	0	0	0	0	0	0	0
BnaA01g08240D	0.481935	1.29749	18.6066	17.6292	1.05487	2.13848	2.73267	2.59746	0.234661	0.342273	0.874194	0.170998	0.997229	6.88764	2.84258	3.07206	14.5329	4.259	2.07562	2.3529	0.525562	0.652166
BnaA01g08250D	0	0	0	0	0	0	0	0	0	0	0.0752509	0.0753784	0	0.0871696	0.247165	0.361878	0.401712	0.137447	0	0	0	0
BnaA01g08260D	98.1184	97.5882	166.939	162.396	380.213	326.29	340.095	355.293	0.522283	2.70145	0	0	227.78	345.199	188.476	108.156	166.558	143.738	0	0	0	0
BnaA01g08270D	0.187876	0.738251	0.298593	0.05677	0.773035	0.442052	0.942178	0.580755	0.0771037	0.150654	0	0	0.988965	0.575738	1.11972	0.793323	1.66423	0.78243	0.0402685	0.14229	0	0
BnaA01g08280D	3.14383	4.70129	3.52267	2.79522	10.4341	9.71668	14.2731	11.6891	0.627872	3.14475	5.41449	2.67492	4.80537	5.3805	4.60108	1.81416	13.0516	3.77609	0	0	0	0
BnaA01g08290D	0.349754	0.473058	3.19083	2.40161	9.36009	11.3704	3.8682	5.17744	0.217252	0.316597	0	0	7.72026	11.907	10.5294	7.51802	7.82869	13.6341	0.111943	0	0	0.0617281
BnaA01g08300D	2.0234	0.321823	1.85216	0.983526	4.72718	8.20106	1.83466	2.73815	0	0.496203	0	0.271944	1.54181	2.12488	1.19902	0.984674	3.48522	6.14463	0	0	0	0
BnaA01g08310D	2.96344	3.94368	2.35574	2.35259	4.03547	3.68101	7.92012	7.8001	0.265564	0.255478	0.307802	0.21127	4.46416	4.94453	5.19029	2.05303	5.7623	4.24955	0	0	0	0
BnaA01g08320D	0.433967	0.146345	0.57102	0	1.98293	1.34688	0.691549	0.486057	0	0	0	0	0.547115	0.663635	1.01107	0.418484	0.150898	0.667732	0.613229	0.12073	0	0
BnaA01g08330D	4.54832	4.13567	6.45969	4.74854	5.50066	4.83153	3.16969	4.21234	1.11131	1.22009	2.29568	1.83298	9.36927	13.9154	4.19095	2.16658	10.0586	9.74002	0.974136	0.701368	0	0
BnaA01g08340D	0	0	0	0	0	0	0	0.202215	0	0	0	0	0	0	0	0	0	0.120218	0	0	0	0
BnaA01g08350D	0	0	0	0	0	0	0	0	0	0	0	0	0	0	0	0	0	0	0	0	0	0
BnaA01g08360D	6.20199	2.07363	15.6895	8.71906	25.5137	37.8242	34.8371	38.8685	17.4564	17.2663	3.62508	15.6513	11.2575	26.5574	12.0696	9.4667	11.9949	27.5036	0	0	0	0.292555
BnaA01g08370D	0.540843	1.46699	0.755834	0.837901	2.26232	0.935669	1.60468	1.65315	0.454384	0.227109	0	0	1.65595	2.9478	1.57854	1.79498	1.97515	0.807932	0	0	0	0
BnaA01g08380D	4.21043	3.8916	1.18599	1.02748	0.566231	1.97083	2.31049	0.641251	0	0	2.86001	0.170645	1.36951	1.689	2.20915	1.39731	2.59577	0.135855	0	0	0	0
BnaA01g08390D	0	0	0	0	0	0	0	0	0	0	0	0	0	0	0	0	0	0	0	0	0	0
BnaA01g08400D	0	0.667144	0.741948	0	0	0	0	0	0	0	0	0	0.580319	0.753932	0	0	3.87425	0	0.499723	0	2.85099	2.83183
BnaA01g08410D	2.19361	4.03054	1.65451	0	2.68042	0	0.884401	1.86743	0	0	0	0	0	1.29287	1.21244	1.99201	3.48659	0	0	0	0	0
BnaA01g08420D	0.7037	0	1.07357	0.412676	0	0	1.14546	1.20022	0	0	0	0	0	0	0.847729	0	0	0	0	0	0	0
BnaA01g08430D	0.395884	0.279078	2.28993	1.12145	6.32362	10.1059	2.85612	4.32827	0	0	0.393227	0.177997	1.43932	2.55188	1.59337	0.720387	5.20464	11.3589	0.375133	0.438638	0	0
BnaA01g08440D	3.90397	3.48533	4.94468	4.13316	10.438	11.8603	13.2028	13.5754	3.12098	3.10265	1.09807	2.56795	12.2999	14.4898	12.039	9.39824	18.3533	23.0066	0.7481	0.627319	5.36163	6.14985
BnaA01g08450D	20.8403	21.1234	36.878	31.0252	61.3961	67.0889	54.6407	51.7342	0	0	0	0	24.0388	19.4681	42.4745	23.2327	17.3589	25.5228	0	0	5.14028	5.44753
BnaA01g08460D	4.96844	2.84276	6.66381	4.35139	19.3579	19.3522	8.88737	5.60569	0	0.165526	0	0	7.15578	10.1889	6.76222	4.51998	2.0069	10.7176	0	0	0	0
BnaA01g08470D	0	0	0	0	0	0	0	0	0	0	0	0	0	0	0	0	0	0	0	0	0	0
BnaA01g08480D	1.75796	3.09728	1.0755	0.947756	1.90308	3.25794	1.96677	0.739327	0.373405	0.247025	3.0324	0.62103	1.50977	0.905018	1.88488	1.32405	3.92551	2.40186	0	0	0	0
BnaA01g08490D	2.76207	0.772977	2.6118	1.45147	8.32055	11.4193	6.68761	6.39402	0.864575	0.634823	0	1.30952	4.67418	7.7262	4.74952	2.90282	1.00182	4.75415	1.36611	1.59254	0.281506	0.574261
BnaA01g08500D	2.23029	0.857335	1.78421	1.11788	1.95267	1.97283	2.84577	2.88443	2.22874	1.5591	0.575221	4.60827	1.86209	3.38648	2.63364	1.71502	0.936281	2.13113	0.296535	0.160297	0.0682907	0.194948
BnaA01g08510D	0	0	0.98311	0.272492	0	0.502176	0.360302	0	0.357272	0	0.679264	0.244164	0	0	0	0	0.510459	0	0.63028	0.733136	0	0
BnaA01g08520D	1.77513	0.955735	1.83462	1.70844	3.30275	3.47187	4.85503	2.26477	1.02446	0.36354	0.298444	0.849821	4.32774	3.97141	6.82231	4.38978	1.93298	2.97381	2.70752	2.52561	2.68936	1.60506
BnaA01g08530D	18.3192	14.7454	13.9568	10.1922	13.1108	14.6711	13.9749	11.6444	7.82222	8.74415	14.7192	10.7324	12.6639	15.3797	15.5288	4.95484	14.6254	17.8083	16.1464	17.8968	12.3766	13.3962
BnaA01g08540D	2.77558	3.99336	8.44844	8.45428	16.992	15.2012	7.26162	9.43163	2.08195	2.3807	3.62673	4.77653	10.2479	10.849	8.99374	3.9889	14.4839	11.5888	1.74448	1.43665	1.02586	1.36795
BnaA01g08550D	5.83865	17.1309	40.4194	40.0193	1.18398	3.33656	12.355	8.68923	21.9899	30.7364	214.418	68.3484	5.09884	1.70174	1.39004	2.03456	5.07691	3.58796	7.95913	11.8787	12.6885	7.72672
BnaA01g08560D	22.6889	20.4937	24.9562	19.308	19.9094	18.1843	18.805	14.5854	22.0303	25.7435	50.2612	39.0342	20.1486	28.4246	20.4948	18.0871	22.2453	26.8573	32.9696	32.2705	33.9975	36.9497
BnaA01g08570D	0	0	0	0	0	0	0	0	0	0	0	0	0	0	0	0	0	0	0	0	0	0
BnaA01g08580D	0	0	0	0	0	0	0	0	0	0	0	0	0	0	0	0	0	0	0	0	0	0
BnaA01g08590D	0	0	0	0	0	0	0	0	0	0	0	0	0	0	0	0	0	0	0	0	0	0
BnaA01g08600D	0	0	0	0	0	0	0	0	0	0	0	0	0	0	0	0	0	0	0	0	0	0
BnaA01g08610D	1.57293	0.874223	0.316618	0.342097	1.02084	1.27985	0	0.912087	1.11103	1.13982	2.55721	0.480762	0.767369	0.353619	0.808076	0.442799	1.25939	0.680649	1.57166	3.82443	0.911012	2.02726
BnaA01g08620D	5.48995	6.67453	2.31758	2.79119	4.51703	3.51467	5.80496	2.75924	1.71616	1.92745	0.52347	1.15631	5.40441	1.48278	8.68855	4.56078	6.46032	3.31123	6.48841	6.2905	1.99853	4.4841
BnaA01g08630D	21.4309	27.9392	8.20321	6.47095	18.2538	15.9248	16.4214	12.8434	6.19449	8.92858	5.82338	4.30612	23.9754	17.6257	27.906	10.3755	18.1801	20.4265	36.2701	44.8658	16.8211	19.3888
BnaA01g08640D	1.46641	1.59651	0.709266	1.23613	1.74792	1.66616	3.43181	3.18501	0	0	0	0	3.49482	3.17437	3.10757	2.17061	3.56693	2.22829	0	0	0	0
BnaA01g08650D	0	0	0	0	0	0	0	0	0	0	0.587884	0	0	0.663567	0	0	0.562523	0.502804	0	0	0	0
BnaA01g08660D	0	0	0	0	0	0	0	0	0	0	0	0	0	0	0	0	0	0	0	0	0	0
BnaA01g08670D	0	0	0	0	0	0	0	0	0	0	0	0	0	0	0	0	0	0	0	0	0	0
BnaA01g08680D	8.36369	6.92034	8.15128	5.28087	28.4343	21.0848	13.9296	9.85268	9.45691	8.72792	1.92295	5.57582	35.2486	20.1235	10.0251	3.82053	17.1832	30.3139	1.26314	0.244532	0.741701	1.20453
BnaA01g08690D	0	0	0	0	0	0	0	0	0	0	0	0	0	0	0	0	0	0	0	0	0	0
BnaA01g08700D	6.61514	9.11109	10.4189	7.09033	19.06	18.6114	16.0075	13.2421	1.08317	1.38107	8.26929	2.50864	11.1134	2.44981	21.0465	13.4658	11.299	20.6892	1.02674	2.27304	0.764619	0.925885
BnaA01g08710D	1.21658	6.58109	6.07738	8.28776	0.785328	0.799826	5.16707	6.69478	2.94806	4.13305	4.64892	0.169972	10.3337	6.15817	6.77037	2.76859	19.6868	7.16717	2.6186	2.33364	1.86972	1.4162
BnaA01g08720D	0	0	0	0	0	0	0	0	0	0	0	0	0	0	0	0	0	0	0	0	0	0
BnaA01g08730D	0	0	0	0	0	0	0	0	0	0	0	0	0	0	0	0	0	0	0	0	0	0
BnaA01g08740D	0	0	0	0	0	0	0	0	0	0	0	0	0	0	0	0	0	0	0	0	0	0
BnaA01g08750D	1.65715	2.91827	0.99996	0.523	7.50009	5.42702	2.55505	3.24263	2.95361	2.43151	0.411587	3.08254	3.28357	0.590887	0.930666	0.942163	1.41815	0.897073	6.66435	3.44185	1.03937	1.68126
BnaA01g08760D	1.99458	1.69875	1.21948	0.687847	1.58041	1.52712	0.194727	1.19341	0.387699	0.381512	0	0.440601	2.73568	1.69587	0.869352	0.259142	3.93943	1.34614	0.306648	0.358826	0.23866	0.797857
BnaA01g08770D	1.8531	2.45236	0	1.37462	0.53243	1.03936	0.770031	2.81432	0	0	0.897565	0	1.26709	1.59956	3.37528	0.520892	4.07113	0.768511	0.442808	0	0.255893	0.254711
BnaA01g08780D	3.56821	3.99241	1.81241	2.64977	4.36669	3.88694	4.94965	4.20626	0	0	0	0.865127	3.02718	4.08259	4.06442	3.62273	6.05847	4.57854	0.308229	0.536447	0.713573	0
BnaA01g08790D	0	0	0	0	0	0	0	0	0	0	0	0	0	0.226228	0	0	0	0	0	0	0	0
BnaA01g08800D	3.79051	8.78411	7.62373	5.95427	12.1473	18.3888	5.42658	4.05753	0.35928	0	0.696903	0.319658	8.52383	8.01928	8.95221	4.1895	17.3879	4.36341	0	0.216158	0.214921	0
BnaA01g08810D	3.62539	1.78473	3.31794	0.953647	5.86146	4.60313	3.97412	5.88188	1.19625	0.571396	0.37868	0.679334	5.77276	3.78866	4.42614	2.42648	5.16674	4.28133	1.40428	2.32976	1.04384	0.772709
BnaA01g08820D	2.7015	7.00277	7.61685	3.13474	19.4215	22.8004	11.7335	7.65751	1.92511	1.2735	0	0.546075	14.8106	10.0696	11.4262	4.87628	6.03468	6.66556	1.72618	1.22708	2.68024	3.19869
BnaA01g08830D	0	0	0	0	0	0	0	0.322817	0	0	0	0	0.200442	0	0	0	0	0	0.17002	0	0.199704	0
BnaA01g08840D	0	0	0	0	0	0	0	0	0	0	0	0	0	0	0	0	0	0	0	0	0	0
BnaA01g08850D	2.35228	2.1475	4.94885	3.24172	2.74738	2.69598	2.43635	2.87018	0	0	0	0	4.53891	4.67982	6.16134	1.99689	4.22133	3.79703	0	0	0	0
BnaA01g08860D	0.116614	0.330283	0.927932	1.55471	1.68285	2.40394	2.16031	1.46116	0	0.184324	0.133037	0	1.21859	0.440802	0.695068	0.737502	1.73168	0.938252	0	0	0	0
BnaA01g08870D	0	0.465837	1.73181	1.09961	7.00152	7.21203	1.0906	4.12162	0	0	0	0	0.234667	1.14365	1.04168	0	2.25267	2.68721	0	0	0	0
BnaA01g08880D	0	0	0	0	0	0	0	0	0	0	0	0	0	0	0	0	0	0	0	0	0	0
BnaA01g08890D	2.45555	2.52708	1.52692	1.09269	3.92535	5.03481	2.01115	2.67226	0.120232	0	0.269971	0.0888004	3.51922	1.77341	7.91693	6.92859	3.26905	2.48428	0	0	0	0
BnaA01g08900D	25.5151	22.1726	20.2509	15.0802	34.036	39.8084	35.8784	24.6729	4.67941	3.59405	6.26561	7.83068	43.6054	40.2706	36.3823	16.8404	46.888	38.1715	5.35626	2.99262	4.92655	4.27546
BnaA01g08910D	0	0	18.193	15.4095	34.0415	32.8497	23.6327	33.6222	0	0	0	0	42.9663	26.6572	36.3281	22.564	19.6423	19.4328	0	0	0	0
BnaA01g08920D	259.528	222.9	305.365	185.348	724.852	937.868	129.778	175.984	0	2.38578	0	0	140.789	197.774	195.037	145.206	98.9563	389.43	0	0	1.50012	0.512234
BnaA01g08930D	1.29884	1.75708	1.23401	1.59721	2.70534	2.1346	3.39972	3.70164	0	0	0.781512	0.307177	1.93366	2.20365	1.11721	0.28627	3.00078	0.600312	0.0590298	0	0	0
BnaA01g08940D	1.90157	1.05661	5.45658	4.25945	5.07926	6.12559	6.23208	5.49237	0.253919	0.483781	1.12775	0.787711	6.23882	5.86918	5.0488	3.24713	6.43692	4.50641	0	0	0.111728	0.208448
BnaA01g08950D	5.88403	3.05588	4.78331	3.81437	9.21487	8.9204	6.47684	4.66514	0.558072	0.464583	0.309553	0.435663	7.08903	8.38186	10.0345	6.53781	7.91993	8.09231	0.852999	1.11875	0.565673	0.648416
BnaA01g08960D	0	0	0	0	0	0	0.237496	0	0	0	0	0	0	0.358659	0.176849	0	0	0	0	0.259111	0.131347	0
BnaA01g08970D	0	0	0	0	0	0	0	0	0	0	0	0	0	0	0	0	0	0	0	0	0	0
BnaA01g08980D	0	0	0	0	0	0	0	0	0	0	0	0	0	0	0	2.74372	0	0	0	0	0	0
BnaA01g08990D	0.41853	0.270781	0	0	1.13098	1.10778	0.223155	0	0	0	0.355705	0	0.895697	1.90461	0	0.722665	0.316811	0	0	0	0	0
BnaA01g09000D	0	0	0	0	0	0	0	0	0	0	0	0	0	0	0	0	0	0	0	0	0	0
BnaA01g09010D	0	0	0	0	0	0	0	0	0	0	0	0	0	0	0	0	0	0	0	0	0	0
BnaA01g09020D	0.519898	0.994785	0	0.318267	0.308188	0	0	0.457754	0	0	0	0	0.145386	0.346768	0	0.284415	0.462932	0	0	0	0	0
BnaA01g09030D	8.27712	5.57948	3.5857	2.66139	3.3208	5.85943	0.949807	0.491123	0	0	0	0	2.95751	7.19817	2.75084	1.21003	12.894	5.83001	5.52239	3.50886	5.83797	5.13187
BnaA01g09040D	1.08609	0.775846	2.68674	1.99704	0	0	0	0.0649877	0.194291	0.253909	0.0934995	0.410525	1.17183	2.29569	0.0951686	0.0432403	0.593635	1.07037	0.559821	0.938147	0.486424	0.841501
BnaA01g09050D	0	0	0	0	0	0	0	0	0	0	0	0	0	0	0	0	0	0	0	0	0	0
BnaA01g09060D	0.398814	0.17787	0.180839	0.133633	0.498003	0.368555	0.376629	0.288015	0	0.0946512	0.0658275	0	0.260225	0.148694	0.493282	0.18982	0.411051	0.175055	0	0	0	0
BnaA01g09070D	0	0.520211	0.267871	0.150318	0	0	0	0	0	0	0	0	0.255525	0.15083	0.280616	0.502829	0	0.232117	0	0	0	0
BnaA01g09080D	0	0	0	0	0	0	0	0	0	0	0	0	0	0	0	0	0	0	0	0	0	0
BnaA01g09090D	0	0	0	0	0	0	0	0	0	0	0	0	0	0	0	0	0	0	0	0	0	0
BnaA01g09100D	0	0	0	0	0	0	0	0	0	0	0	0	0	0.168654	0.158408	0.143279	0.154659	0	0	0	0	0
BnaA01g09110D	17.2504	16.6532	15.0594	18.2006	25.1051	29.8855	40.6356	34.6943	0.654948	1.51215	1.26103	0.936867	29.1968	33.8323	39.1612	25.4794	67.9456	29.1443	1.19348	0.974691	0	0
BnaA01g09120D	11.6102	11.4237	4.94185	6.58983	7.34229	22.9637	13.1562	25.5492	0	1.2067	0	0	19.4929	15.7306	17.1511	15.6001	40.5822	41.1314	0.63754	0	0	0
BnaA01g09130D	1.27589	1.34455	1.49811	0.506913	2.6438	3.12213	2.38296	2.55275	0	0.12483	0	0	3.60712	4.28992	5.24275	3.123	3.16247	3.17636	0.066491	0.154663	0	0
BnaA01g09140D	5.87474	4.7771	9.53966	7.44294	6.28288	4.95627	8.94016	6.15252	2.29698	2.77479	0	0	1.78053	2.73229	3.98822	3.777	2.91605	0.758141	1.27724	0.905987	0	0
BnaA01g09150D	14.5164	20.9832	22.7765	27.7833	14.0282	11.6735	37.0267	21.0531	0	3.27298	4.01341	1.33842	20.5934	38.8113	32.1982	14.5868	26.241	18.6169	0	6.40336	0	0
BnaA01g09160D	23.4031	17.1018	14.7267	13.1668	34.9824	34.9865	29.4968	24.3271	0.417917	0	0	0	37.0485	42.7184	33.5831	14.9326	23.0457	24.4455	1.31351	0.519131	0	0
BnaA01g09170D	0	0	0	0	0	0	5.58496	0	0	0	0	0	0	0	0	0	0	0	0	0	0	0
BnaA01g09180D	3.85423	5.94458	5.50502	3.0926	10.5914	8.81765	6.23485	9.32696	0	0	0	0	8.85567	11.4057	4.2396	1.81076	7.18644	7.48039	0	0	1.83923	0.948705
BnaA01g09190D	0	0	0	0	6.29364	5.00722	0	0	0	0	0	0	0	0	0	0	0	0	0	0	0	0
BnaA01g09200D	1.39829	7.85075	0	0	0	0	0	0	0	0	0	0	0	0	4.72019	0	3.12939	0	0	0	0	0
BnaA01g09210D	0.950399	1.52117	1.86561	0.874202	0.551147	0	0.392719	0	0	0	0	0.286838	0.804846	0.630628	2.34865	1.08919	0	0.754056	0	0.267105	0	0
BnaA01g09220D	10.6637	4.27796	9.61241	6.14763	6.84397	12.1784	10.0424	10.0006	0.273305	0.538301	0.111535	0.725789	8.23219	8.78675	17.4804	12.1866	6.16057	20.284	2.74152	1.29605	0	0
BnaA01g09230D	0	0	0	0	0	0	0	0	0	0	0	0	0	0	0	0	0	0	0	0	0	0
BnaA01g09240D	1.46184	0.459028	1.57434	1.04253	3.65978	2.84457	3.52709	2.08096	0.298032	0.44168	0.0982097	0.596361	2.0137	3.06011	2.93431	1.10875	1.40521	2.14103	0	0	0	0
BnaA01g09250D	2.73081	4.6402	18.3849	15.1414	19.4789	24.8768	7.15039	7.64489	0.930188	0	0.368486	0.719725	5.39682	4.97915	8.18571	3.36623	8.96907	6.62813	0	0	0	0
BnaA01g09260D	1.88066	1.69987	1.00039	0.52755	4.79287	4.9245	3.39853	4.06281	2.81462	2.91147	1.47498	3.29567	3.23491	3.50517	2.93183	1.61539	1.77679	2.73133	0	0	0	0
BnaA01g09270D	59.6075	60.0055	204.505	180.183	189.355	176.247	185.763	182.24	31.1539	36.7531	19.7948	35.3865	179.589	216.538	202.541	111.278	236.35	240.504	0.0834038	0	0	0.0902719
BnaA01g09280D	0	0.232306	0.591469	0.52559	0.25192	0	0.567421	0.580504	0	0	0	0	0.259232	0	0.14028	0.257904	0.136824	0.119095	0	0	0	0
BnaA01g09290D	35.9855	26.7746	32.2096	20.1352	38.0188	37.537	48.2577	46.8659	25.0701	27.862	39.3692	42.9445	59.8218	70.0237	62.5449	45.6436	63.1871	75.6891	18.5157	19.6378	17.0584	22.5255
BnaA01g09300D	0	0	0	0	0	0	0	0	0	0	0	0	0	0	0	0	0	0	0	0	0	0
BnaA01g09310D	0	0	0	0	0	0	5.172	5.48662	0.133967	0.132598	0	0.0956451	0	0	0	0	3.10991	0	0	0	0	0
BnaA01g09320D	0	0	0	0	0	0	0	0	0	0	0	0	0	0	0	0	0	0	0	0	0	0
BnaA01g09330D	0.136682	0.0746774	0.383398	0.127706	0.625267	0.530159	0.590111	0.30531	0.240058	0.0600045	0	0.342409	0.289902	0.460825	0.421997	0.237656	0.501405	0.534402	0.0352793	0.124589	0	0
BnaA01g09340D	1.02338	0	0	0	1.88907	4.90996	0	0	0	0	0	0	0	0.725696	1.15358	0	0	1.47964	0	0	0	0
BnaA01g09350D	0	0	0	0	0	0	0	0	0	0	0	0	0	0	0	0	0	0	0	0	0	0
BnaA01g09360D	0.16854	0.59993	0.431231	0.580943	2.1354	1.9424	0.955273	1.3942	2.09015	1.233	4.60342	1.60864	0.755361	0.550736	0.417975	0.0940658	3.83217	1.55313	0	0	0	0
BnaA01g09370D	2.59862	2.22523	7.43897	4.92328	9.63487	8.72818	7.52497	5.27596	2.88736	2.5983	0.608758	3.23914	10.921	10.9348	6.34019	3.41773	4.91487	4.48768	0.565213	0.471953	0	0
BnaA01g09380D	1.48925	0	0.572747	0	0	2.4995	0	0.810977	0	0	0	0	0.486893	1.30561	2.30857	0	0.570538	0	0	0	0	0
BnaA01g09390D	12.2542	7.05188	29.532	28.2678	45.0769	61.3992	13.0999	22.3208	1.3005	0	0	0	17.1548	1.08323	28.0229	11.6155	17.8747	42.0565	0	0	0	0
BnaA01g09400D	7.78205	6.3328	11.2561	4.93576	20.1148	25.0206	25.8686	19.8231	0.685669	0	0	0.547509	8.86207	8.63278	15.6592	6.45779	8.75499	10.8732	0	0	0	0
BnaA01g09410D	0	0	0	0	0	0	0	0	0	0	0	0	0.330139	0.431795	0	0	0	0	0.276382	0	0	0.307903
BnaA01g09420D	0.911607	0.533075	0.868926	0.549042	2.73535	2.69402	1.26369	1.38614	0	0	0.0662555	0.0628565	1.48946	2.58247	1.05889	1.18506	1.51729	1.58664	0.375854	0.38639	0.167308	0.261087
BnaA01g09430D	0.355784	0.204527	0.566592	0.402072	0.838199	0.720782	1.67066	1.02561	0	0.169656	0	0.0610116	0.815012	0.811895	0.751768	0.289337	1.67763	1.5039	0	0	0	0
BnaA01g09440D	0	0	0	0	0	1.62908	0.489228	0	0	0	0	0	0.301548	0.375883	0.342593	0.578787	0.333365	0	0	0	0	0
BnaA01g09450D	0	0	0	0	0	0	0	0	0	0	0	0	0	0	0	0	0	0	0	0	0	0
BnaA01g09460D	0	0	0	0	0	0	0	0	0	0	0	0	0	0	0	0	0	0	0	0	0	0
BnaA01g09470D	1.33164	1.2652	2.12082	1.54397	2.98973	2.73938	3.96596	2.39136	0	0.134698	0	0	3.44978	3.50299	2.32738	2.31783	1.75166	4.01395	0	0	0.267968	0.403365
BnaA01g09480D	1.00051	0.762737	1.47361	1.08257	0.536313	1.20359	0.613006	0.837044	0.309597	0	0	0	2.34485	2.92481	4.23233	1.85716	2.66977	3.39491	0	0	0.0663998	0.953793
BnaA01g09490D	0	0	0	0	0	0	0	0.301956	0	0	0	0	0	0	0	0	0	0	0	0	0	0
BnaA01g09500D	0	0	0	0	0	0	0	0	0	0	0	0	0	0	0	0	0	0	0	0	0	0
BnaA01g09510D	0	0	0	0	0	0	0	0	0	0	0	0	0	0	0	0	0	0	0	0	0	0
BnaA01g09520D	2.50716	2.52675	4.31464	2.06143	19.7613	17.9785	17.5517	11.8794	0.177505	0.344438	0.319226	0	15.6718	9.12841	3.25708	1.46731	2.26291	9.66246	0.172502	0.200633	0	0
BnaA01g09530D	16.491	14.4676	9.84236	10.5848	19.4371	26.131	14.3801	16.2075	0.217637	1.06583	0.180194	0.508272	15.2885	13.2766	20.0852	12.6467	25.4361	19.639	0	0	0	0
BnaA01g09540D	124.364	54.1222	7.71263	5.74333	66.3193	100.408	61.6268	63.2505	29.6817	34.6705	1.88931	16.5435	73.007	104.407	60.7404	43.2348	33.0008	95.4513	0	0.343212	0	0.330195
BnaA01g09550D	6.2002	15.6116	0	0	2.79037	1.54384	4.61089	6.02277	0	0	0	0	8.16767	10.2529	2.33279	0.90632	20.174	10.7242	0	0	0	0
BnaA01g09560D	3.87015	1.12463	3.68082	2.20062	3.54886	5.18891	5.36382	5.60227	1.32594	1.11864	0.29879	2.0094	5.61171	6.95755	6.66801	5.24286	2.09344	5.40113	0.0743832	0	0.042884	0.0801014
BnaA01g09570D	1.92904	1.50596	3.79683	2.66592	8.05021	12.4435	4.36554	3.71936	0.276785	0	0	0	5.86745	5.8691	9.00805	2.80445	2.08629	4.57018	0	0	0	0
BnaA01g09580D	0	0	0.0870362	0.0959301	0	0	0.129928	0.259533	0	0	0	0	0	0.537527	0.0976618	0.0886868	0.09611	0	0	0	0	0
BnaA01g09590D	0	0	0	0	0	0	0	0	0	0	0	0	0	0	0	0	0	0	0	0	0	0
BnaA01g09600D	0	0	0	0	0	0	0	0	0	0	0	0	0	0	0	0	0	0	0	0	0	0
BnaA01g09610D	0	0	0	0	0	0	0	0	0	0	0	0	0	0	0	0	0	0	0	0	0	0
BnaA01g09620D	17.4677	8.34841	8.61088	5.35657	34.5178	27.5454	17.0739	22.463	0	0.401508	0	0	23.0336	33.2666	18.8893	16.3468	26.537	21.4455	0	0	0.245757	0.241134
BnaA01g09630D	0	0	0	0	0	0	0	0	0	0	0	0	0	0	0	0	0	0	0	0	0	0
BnaA01g09640D	7.84636	16.7527	43.9346	38.0697	72.7398	64.6553	90.5709	69.8661	12.9306	11.638	57.9026	26.1724	41.6655	38.0036	42.9935	29.4458	83.655	67.2329	0.415141	0.240975	2.52613	2.71042
BnaA01g09650D	3.5067	3.58321	6.10287	3.85601	9.52264	7.94658	8.05402	7.67706	0.248757	0.364191	0.146799	0.973217	12.3976	13.5046	8.72786	5.98328	4.21143	6.61815	0.0329194	0.0381089	0.0771866	0.177968
BnaA01g09660D	0.269758	0.269636	0.191551	0	0.790087	0.367074	0.14569	0.28959	0	0	0	0	0.20885	0.472835	0.440171	0.599056	0.432108	0.183739	0	0	0	0
BnaA01g09670D	0	0	0	0	0	0	0	0	0	0	0	0	0	0	0	0	0	0	0	0	0	0
BnaA01g09680D	0.323064	0	0	0	0	0	0	0	0	0	0	0	0	0	0	0	1.10438	0	0	0	0	0
BnaA01g09690D	0.333998	0.503569	0.421363	0.0951696	0	0.172855	0.136679	0	0	0	0	0	0	0	0.611253	0.0902355	2.35503	0.927782	0	0	0	0
BnaA01g09700D	3.42578	3.81061	3.74664	2.814	10.7128	10.8602	8.65841	8.68355	2.12925	2.79473	1.7516	1.5604	7.67892	10.7608	6.60216	3.55535	5.08571	11.4529	2.72059	1.92857	0.4287	0.419077
BnaA01g09710D	13.2398	4.77744	7.18249	4.79862	16.8356	20.1867	12.5308	14.186	0.12397	0	0	0.252978	16.8814	23.4617	27.8873	15.9679	7.24635	24.9633	1.87112	2.17251	0	0
BnaA01g09720D	1.24935	1.23869	0.421762	0	0.470503	0.476003	0.326832	0.339559	0	0.315603	0	0	0.405196	0	0.485441	0.869502	0	0	0	0	0	0
BnaA01g09730D	9.0213	12.7348	7.18989	4.48084	10.7685	7.87044	4.80152	4.00987	0	0	0	0	12.3434	10.7723	8.2834	4.0306	10.5735	4.76768	0	0	0.742638	0.518614
BnaA01g09740D	2.90829	3.82538	2.73995	2.39282	7.90934	5.98515	3.04081	1.66099	1.38335	1.38326	2.60352	1.44266	4.52467	2.21932	1.71031	1.19699	3.93121	3.50458	0	0	0.261474	0.166711
BnaA01g09750D	0	0	0	0	0	0	0	0	0	0	0	0	0	0	0	0	0	0	0	0	0	0
BnaA01g09760D	0	0	0	0	0	0	0	0	0	0	0	0	0	0	0	0	0	0	0	0	0	0
BnaA01g09770D	12.0543	12.9753	9.9923	7.35376	10.6136	12.5481	18.1614	20.5652	0	0	0	0	19.2323	32.2091	24.9315	15.9401	34.9596	16.8861	0	0	0	0
BnaA01g09780D	0	0	0	0	0	0	0	0	0	0	0	0	0.777134	0	0	0	0	0	0	0	0	0
BnaA01g09790D	0	0	0	0	0	0	0	0	0	0	0	0	0.158502	0	0	0	0	0	0	0.153835	0	0
BnaA01g09800D	11.6633	11.1626	4.28109	3.65732	28.3704	34.6784	20.6349	17.5726	3.41114	5.67472	8.94596	6.20687	6.86074	12.8545	5.06985	2.57279	7.40968	7.50689	0	0	1.23252	2.19645
BnaA01g09810D	0.727315	1.16313	1.60799	1.13059	4.82022	1.78216	2.78996	2.25011	0	0.400593	0.8894	0.73619	3.53306	3.05248	5.49139	2.85472	2.13448	3.7456	0.0672792	0.545729	0.393909	0.668768
BnaA01g09820D	6.85148	6.13231	4.39528	3.27083	10.4093	12.0947	10.8531	10.2428	1.87065	1.65268	0.354467	1.76114	14.784	12.9171	12.5726	8.88342	7.47303	10.0419	1.67521	1.65387	1.38667	1.47689
BnaA01g09830D	3.31658	3.73261	3.4499	2.38762	5.58678	6.05528	4.3833	5.12975	0.878931	0.840135	2.32572	0.939731	5.789	5.649	5.85852	3.18573	7.64228	6.85233	0.572966	0.609463	0.331162	0.782116
BnaA01g09840D	0.620797	0.810711	1.55641	1.56245	0.61746	0.791772	0.199296	0.657286	0	0	0	0	1.73424	1.84192	4.26236	2.32553	4.55882	2.18751	0	0	0	0
BnaA01g09850D	1.50885	5.33554	3.56741	4.59503	6.05067	4.51596	2.77421	2.30675	0	0.243053	0	0	2.74904	4.10895	2.53628	2.12195	4.39517	3.70094	0	0	0	0
BnaA01g09860D	10.2827	9.45927	6.30528	4.61426	18.1278	17.1896	17.4707	19.3841	1.19642	0.89466	0.583224	0.902193	22.2035	29.395	17.8921	11.4502	28.9487	21.5133	2.52658	2.17611	0.0584806	0.0553758
BnaA01g09870D	8.42923	6.62482	7.13017	4.79485	12.9078	13.419	12.4807	13.0863	0.671185	0	1.13071	0.679273	17.7498	12.3167	20.8163	14.4763	10.8672	10.8801	0	0	0	0.576018
BnaA01g09880D	5.09316	3.5373	11.9036	8.50241	13.7875	12.2413	4.5761	5.41351	0	0	0	0	0.90107	0.886871	2.04319	1.64031	10.537	12.0424	0	0	0	0
BnaA01g09890D	6.29362	7.2253	6.77103	5.64936	24.4016	32.3031	11.8727	12.568	2.8358	3.28146	1.83754	1.98374	19.0326	27.8892	15.5902	13.1123	11.9204	9.98105	0.666352	0.884331	0.767686	0.528811
BnaA01g09900D	4.14811	20.8326	12.1743	11.1761	28.3259	34.4934	17.3893	20.9889	0	0.145033	0	0	8.0437	9.9003	25.3015	11.3612	15.5236	8.17328	2.40723	2.06765	0.798801	1.22396
BnaA01g09910D	2.26803	1.94551	2.89799	1.91987	5.48928	5.30894	4.74786	3.99124	0.518097	0.392646	0.17843	0.0812359	4.36916	3.87491	5.50492	3.73945	5.32962	6.84373	0.565754	0.654819	0.417554	0.562953
BnaA01g09920D	5.4596	3.7488	2.43125	1.69403	7.85866	16.9884	7.86845	7.81364	1.87887	2.22342	3.36959	0.87122	8.72666	4.87944	9.3968	6.11905	8.93942	3.996	1.51666	1.75108	0.800436	1.44812
BnaA01g09930D	2.15855	3.24981	1.92976	1.45639	8.55766	9.18508	4.01272	4.92769	0.445314	0.263034	0.465807	0.1959	4.66965	4.50492	5.66181	3.99202	3.9175	3.43243	0.311269	0.304436	0.123187	0.335377
BnaA01g09940D	2.60665	3.27933	2.68214	1.45006	3.14092	5.82118	6.32989	3.94354	0	0.634923	0	0	3.44133	7.05323	13.442	3.58329	7.88248	3.20237	0	0	0	0.798831
BnaA01g09950D	0	0	0	0	1.23825	0.871819	0	0	0	0	0	0	0	0	0	0	0	0	0	0	0	0
BnaA01g09960D	0	0	0	0	0	0	0	0	0	0	0	0	0	0	0	0	0	0	0	0	0	0
BnaA01g09970D	9.71015	3.71862	8.17758	4.27815	14.6681	17.8142	14.9683	17.8254	3.4591	2.01171	2.84121	5.84277	14.2143	17.5483	16.4522	12.5948	11.4415	15.571	0	0	0	0
BnaA01g09980D	3.19819	4.26488	4.49085	3.18564	1.35327	7.22037	12.1729	11.9541	1.45945	0.760141	0	1.8227	8.33991	10.4085	6.83996	4.57176	4.51272	7.50371	5.01978	7.81804	2.88652	2.37208
BnaA01g09990D	8.45936	5.11501	18.3937	12.1229	26.4937	29.3517	31.1553	25.8393	43.0255	40.3623	8.14984	45.3151	48.3799	22.8092	58.8818	34.4272	20.8162	27.3652	14.933	8.31426	7.17097	5.90945
BnaA01g10000D	2.71172	3.34361	2.97129	2.7259	4.5638	4.08905	2.31157	1.84259	1.84163	1.30978	2.65958	2.73473	3.49505	2.79728	1.83742	0.898004	5.18845	2.32952	0.268797	0.207877	0.206066	0.198805
BnaA01g10010D	0	0	0	0	0	0	0	0	0	0	0	0	0	0	0	0	0	0	0	0	0	0
BnaA01g10020D	0	0	2.49068	1.29308	0.691063	0.690042	0.834731	1.21299	0	0	0	0	2.41255	1.5326	1.33372	1.59552	4.00705	3.20173	0.676236	0.295637	0	0.384146
BnaA01g10030D	0	0	0	0.114397	0	0	0	0	0	0	0	0	0	0	0	0	0	0	0	0.0931336	0	0
BnaA01g10040D	1.87803	2.086	1.87027	1.79317	4.11111	5.28157	4.50699	4.39762	0.415394	0.353816	0.708255	1.17562	2.87178	5.53157	2.94799	1.49235	1.56122	4.62126	0	0.139628	0.419249	0.319277
BnaA01g10050D	4.29468	2.22133	5.3548	4.04016	7.82888	8.24951	9.32083	6.72982	2.39531	2.28346	2.77164	2.59756	9.18343	9.0203	7.51984	4.72482	6.77404	8.75842	0	0	1.02071	0.877339
BnaA01g10060D	0.956984	0.462313	2.34475	1.41644	2.79589	3.0655	1.50796	0.252558	0	0	0.195102	0.381951	4.40076	6.32882	2.23019	5.40243	0.924459	1.47357	0	0	0	0
BnaA01g10070D	1.22245	0.586023	1.02012	0.33855	2.14315	1.03493	0.625379	2.06929	0	0	0	0	0.750133	0	1.85083	0.961436	1.27952	0.909393	0	0	0	0.101349
BnaA01g10080D	0	0	0	0	0	0	0	0	0	0	0	0	0	0	0	0	0	0	0	0	0	0
BnaA01g10090D	0.496236	0.340799	1.62236	1.33078	1.54032	1.45404	1.07412	2.18832	0	0	0	0	3.59445	6.48828	3.46272	2.73859	1.36691	3.55062	0	0	0	0
BnaA01g10100D	4.62559	4.45952	6.35673	5.25173	10.609	12.6498	7.98787	8.87259	0.161133	0.314884	0.553552	1.07008	9.33957	15.1108	10.0358	6.22169	7.28013	9.30554	1.98275	1.75885	1.30176	0.98108
BnaA01g10110D	5.93051	6.69826	56.2343	41.697	11.1086	9.3062	9.98615	7.35075	0	1.09149	0	0	66.2126	68.2639	71.3987	37.3695	27.8844	64.0425	0	0	0	0
BnaA01g10120D	0	0	0	0	0	0	0	0	0	0	0	0	0	0	0	0	6.38305	0	0	0	0	0
BnaA01g10130D	9.37403	2.45673	0.879454	0	0	1.87076	8.05569	13.3253	0	0.614768	0	0	1.16481	2.4587	0.883799	0.771342	0.887956	1.17588	0	0	0	0
BnaA01g10140D	0.266857	0.868637	3.60178	0.682213	3.86644	3.77464	6.62286	4.50503	0.880404	0.436654	0.717939	0.676875	11.8306	18.0586	15.1302	10.0442	4.09261	13.4203	0	0	0	0
BnaA01g10150D	0	0	0	0	0	0	0	0	0	0	0	0	0	0	0	0	0	0	0	0	0	0
BnaA01g10160D	5.23847	6.527	9.89325	12.7453	2.50958	8.30735	5.81712	5.01982	0	0	25.4451	15.0245	9.17925	10.5216	15.1569	8.26777	7.54667	7.77178	22.2496	24.7871	27.6469	28.3153
BnaA01g10170D	0	0	0	0	0	0	0	0	0	0	0	0	0	0	0	0	0	0	0	0.242722	0.237759	0.239421
BnaA01g10180D	0	0	0	0	0	0	0	0	0	0	0	0	0	0	0	0	0	0	0	0	0	0
BnaA01g10190D	0	0	0	0	0	0	0	0	0	0	0	0	0	0	0	0	0	0	0	0	0	0
BnaA01g10200D	1.39588	1.59154	3.28734	1.87161	1.67467	3.10303	4.19201	3.39726	0.131459	0	0	0	1.79049	2.81776	1.54385	0.794873	1.67079	2.73578	0	0	0	0
BnaA01g10210D	0	0	0.0978365	0.0557736	0	0	0	0	0	0	0	0	0	0	0	0	0	0	0	0.0508855	0	0
BnaA01g10220D	5.40557	5.09224	6.50222	4.34393	15.8674	13.1328	4.30757	4.58108	1.13509	1.43508	1.49335	0.502371	4.14131	6.59624	2.93313	1.78544	12.7698	8.91406	1.28325	0.638204	0	0
BnaA01g10230D	6.97456	7.13837	3.21263	2.87547	7.6149	7.96878	6.52338	6.86881	1.82418	2.02884	1.03892	1.126	5.90355	7.92308	10.0396	6.77213	17.9474	6.23968	2.44231	2.73686	0	0
BnaA01g10240D	0	0	0	0	0	0	0	0	0	0	0	0	0	0	0	0	0	0	0	0	0	0
BnaA01g10250D	0	0	0	0	0	0	0	0	0	0	0	0	0	0	0	0	0	0	0	0	0	0
BnaA01g10260D	0	0	0.437715	0	0.479667	0	0	0	0	0	0	0	0	0	0	0.207836	2.11409	0.206421	0	0	0	0
BnaA01g10270D	3.72537	6.15751	5.46654	4.45339	6.7243	5.0964	5.77735	4.9072	1.12009	0.403417	1.30776	0.418987	6.99909	5.95937	8.971	5.37022	8.87963	7.28351	0.871273	0.854011	0.0847428	0.241053
BnaA01g10280D	2.69514	1.16274	3.39303	2.49951	4.52485	4.77356	6.75772	5.97436	4.6731	3.44712	2.50919	7.67303	6.88936	8.92058	9.92384	6.20433	1.65678	4.47027	2.00505	1.38307	2.34686	2.48543
BnaA01g10290D	0.561713	0.444895	0.895494	0.658155	3.1751	4.68628	2.64338	3.01197	0.266747	0.256466	0	0.441436	0.607045	0.42325	0.399931	0.53716	0.396695	3.19856	0	0	0.157033	0.153891
BnaA01g10300D	1.59147	0	1.22666	0	3.11639	5.92349	2.75846	4.85609	0	0	0	0	0	1.32243	1.22496	0.52026	1.17318	0	0	0	0	0
BnaA01g10310D	0.152579	0.166433	0	0	0	0	0	0	0.0868502	0	0.129	0	0.233143	0	0.44092	0.114657	0.309359	0	0	0	0	0
BnaA01g10320D	0	0	0	0	0	0	0	0	0	0	0	0	0.129451	0	0	0	0	0	0	0	0	0
BnaA01g10330D	2.36883	4.7835	0	0	7.98738	8.5586	2.88552	3.87382	2.82396	0.944871	0	0	7.36716	2.31984	3.97382	3.48865	0.65434	0.586712	0	0	0	0
BnaA01g10340D	8.89752	12.3596	7.6808	5.22269	12.6537	10.7712	10.4503	10.5334	0.880113	0.434121	0.657079	3.5298	6.63893	9.95452	14.2323	4.9299	6.8531	9.27546	0	0	0	0
BnaA01g10350D	0	0	0	0	0	0	0	0	0	0	0	0	0	0	0	0	0	0	0	0	0	0
BnaA01g10360D	6.03482	2.70425	16.5323	12.4925	13.3919	18.7657	9.86034	13.9885	6.27522	6.40437	1.1066	4.07588	12.8219	20.6773	14.4516	9.97381	8.51559	9.42497	8.93705	11.4648	0	0
BnaA01g10370D	3.76618	1.40196	67.7342	39.2803	2.49593	4.37063	10.1932	8.94133	16.7643	14.4914	15.8809	21.7783	43.5809	6.22233	110.66	74.266	1.5094	42.1632	6.39293	9.93395	0	0
BnaA01g10380D	0	0	0.104473	0	0	0	0	0	0	0	0	0	0.10361	0	0.117429	0	0	0	0	0	0	0
BnaA01g10390D	0	0	0.293453	0.554571	0	0.214389	0.471078	0	0	0	0	0	0.304892	0.240866	0.114851	0.208519	0.217992	0.192921	0	0	0.198643	0
BnaA01g10400D	1.75046	1.25629	0.969802	0.419886	1.09567	1.96674	1.89565	1.85711	0.0647917	0.0625649	0.180743	0.178802	1.44368	2.65889	2.40108	1.65444	2.13017	0.793412	0.161126	0.223017	0	0.0359809
BnaA01g10410D	0.906843	0.602335	3.81195	3.18788	3.44838	3.32654	1.26704	1.79432	0.21925	0.412631	0.0799075	0.15501	1.31617	1.26638	2.26272	0.725353	0.800507	1.61739	0.334624	0.12773	0.12652	0.181058
BnaA01g10420D	0.476211	0.563121	0.111938	0.446555	0.115234	0.230957	0	0.0961441	0.0966407	0	4.00141	0.140042	0.193648	0.302742	0.436716	0.385349	0.845981	0.184003	0.0524767	0.18345	0	0.226054
BnaA01g10430D	0	0	0.0455521	0	0	0	0	0	0	0	0	0	0	0	0	0	0	0	0	0	0	0
BnaA01g10440D	0	0	0	0	13.8361	10.9468	8.05341	21.1549	0	2.67762	2.52074	2.51909	2.89563	0	0	0	0	0	0	0	0	0
BnaA01g10450D	0	0	0	0	0	0	0	0	0	0	0	0	0	0	0	0	0	0	0	0	0	0
BnaA01g10460D	2.43581	2.27287	7.41323	6.31678	12.3722	9.88448	7.39373	7.37947	2.62083	2.9822	1.53073	0.744492	10.9891	7.25498	5.57725	3.60473	6.00809	5.54578	0.873123	1.4377	0	0.291516
BnaA01g10470D	0.111835	0.126217	0	0	0	0	0.383463	0.597474	0	0	0	0	0.248399	0.148347	0	0.244395	0.381229	0	0	0	0	0
BnaA01g10480D	0	0.0771585	4.44044	1.57241	0	0.155776	2.54293	0.129646	0.259488	0	0.0822278	0.337558	7.33242	12.0488	14.2657	6.62007	0	28.4843	0	0	0	0
BnaA01g10490D	11.4312	11.4287	12.0817	7.26533	16.0723	17.2525	5.41585	8.6857	2.64453	4.24903	5.89237	0.993335	10.793	8.85047	10.4935	4.55929	11.9139	10.4792	0.756375	0.448163	0.440608	0.816303
BnaA01g10500D	1.94908	3.35233	4.97882	4.27617	4.35385	4.06695	4.53153	2.9888	2.63614	2.06273	2.53696	3.15186	4.33298	3.46685	1.89667	1.15883	5.80611	3.20929	0.340297	0.134344	0.274592	0.37826
BnaA01g10510D	1.93147	1.47176	2.21181	2.04004	5.24654	2.72284	3.993	3.90645	0	0	0	0	3.47402	1.61328	3.46929	2.29117	6.02691	3.51284	0	0	0	0.104103
BnaA01g10520D	0	0	8.49961	11.7777	0	0	2.15556	4.35793	0	0	0	0	2.47004	0	2.89505	1.26184	0	0	0	0	0	0
BnaA01g10530D	2.41021	1.33682	3.89774	2.99639	6.51831	7.63228	10.0529	11.1581	2.12422	2.17044	0.998933	4.17057	11.7285	26.9197	9.06494	5.10398	7.97093	7.70576	0.0564308	0.262109	1.83935	1.49929
BnaA01g10540D	2.61655	1.00049	0.431943	0.322795	11.4841	12.0125	9.05659	9.49233	0.359559	1.18149	0.405729	2.65872	4.02459	8.53526	5.63053	3.575	1.70998	3.81643	0	0	0.384644	0.290628
BnaA01g10550D	27.7433	53.9327	372.939	402.064	259.833	207.082	418.663	434.83	5.66429	9.60911	11.4304	21.2795	455.749	629.394	735.339	369.225	83.2037	196.321	1.87825	5.01876	31.3034	31.2764
BnaA01g10560D	0	0	0	0	0	0	0	0	0	0	0	0	0	0	0	0	0	0	0	0	0	0
BnaA01g10570D	0.159204	0.393579	0.218358	0.685412	1.45336	0.844972	1.38726	1.11976	0	0	0	0	1.33152	1.60936	0.764619	0.551607	0.809511	0.175144	0	0	0.5859	0.194065
BnaA01g10580D	8.85191	9.474	2.75109	5.7287	14.0139	10.2749	13.3558	14.7862	0	0	0	0	9.2863	0.921989	24.8311	13.3319	17.9022	15.4957	0	0	0.676181	0.712886
BnaA01g10590D	4.77103	3.66034	3.31984	2.97649	12.4209	10.8697	8.46319	6.75848	0.450592	0.373571	0.137997	0.272608	12.9404	17.268	14.8804	10.0114	8.28738	10.0114	0.0349984	0.0813578	0.283939	0.266602
BnaA01g10600D	0.911554	0.784678	1.94744	1.0674	4.59917	5.95872	4.79755	5.10104	4.17679	3.81031	14.7901	7.32046	15.1097	12.4766	15.7368	9.71195	1.91514	0.166865	0.278018	0.644712	1.58941	0.46493
BnaA01g10610D	0	0	0	0	0	0	0	1.44576	0	0	0	0	0	0	0	0	0	0.855092	0	0	0	0
BnaA01g10620D	1.1166	0.349778	3.66879	1.72666	1.69931	4.62757	3.47173	1.72769	2.71228	2.0044	0.508533	3.39604	13.5538	14.1242	11.4458	5.88511	0.939478	10.2741	0.658067	0.658238	0.201213	0.585111
BnaA01g10630D	17.4338	9.07362	17.3352	8.3014	19.732	10.0997	34.4335	27.8568	0	0	0	0	12.704	15.7682	14.1315	8.07008	2.41076	5.87338	0.201062	0	4.50476	3.17905
BnaA01g10640D	0	0	0	0	0	0	0	0	0	0	0	0	0	0	0	0	0	0	0	0	0	0
BnaA01g10650D	1.38734	0.856435	3.17155	3.17524	2.80943	0.909776	2.58597	4.37273	0.351294	0	0.142954	0.271277	3.20298	3.99427	3.24817	1.63075	4.69174	2.65234	0	0	0	0
BnaA01g10660D	0.617769	0.376516	1.45482	1.27097	1.17896	1.66117	0.651475	0.372736	0	0	0	0	0.558167	1.14256	1.92323	0.782912	0.357032	1.18357	0.0497567	0.114886	0.0569568	0.0534269
BnaA01g10670D	2.96751	3.03852	11.5672	10.1879	5.96288	6.67837	8.014	8.11614	0.455667	0	0	0.161967	11.0052	17.7312	8.62646	6.07502	8.84372	19.7314	0	0	0	0
BnaA01g10680D	0.184891	0	0.172199	0.0966353	0	0.181777	0.290938	0.585145	0	0	0	0	0	0.952749	0.450367	0	0.331139	0.681736	0	0	0	0
BnaA01g10690D	0	3.21854	0.398599	0.948419	0	0.917643	0.614815	0	0	0	0	0	0.354277	0.897953	0.406916	0	0.378453	0.34492	0	0	0	0
BnaA01g10700D	0	0	0	0	0	0	0	0	0	0	0	0	0	0	0	0	0	0	0	0	0	0
BnaA01g10710D	0	0	0	0	0	0	0	0	0	0	0	0	0	0	0	0	0	0	0	0	0	0
BnaA01g10720D	0	0	0	0	0	0	0	0	0	0	0	0	0	0	0	0	0	0	0	0	0	0
BnaA01g10730D	0.566359	0.58459	0.444403	0	0.652673	1.28129	0	1.15905	2.79363	4.55788	2.87264	2.90567	1.35075	1.11199	1.03281	0.311145	0.505508	1.03752	1.24614	1.88075	0.976946	0.986347
BnaA01g10740D	0.344242	0.153165	0.301431	0	1.32531	1.98978	0.393204	0.132554	0	0	0	0.940797	0.915637	0.402645	0.100941	0.0857785	0.557057	2.86502	0.717328	0.380285	0	0.0705645
BnaA01g10750D	6.76756	7.3578	10.6227	5.68299	18.1169	15.7593	15.6092	12.5898	0.667911	0.255695	0.532569	0.465539	18.7321	15.5091	20.6445	12.2861	12.6004	12.4602	1.93461	1.33604	2.08326	1.74969
BnaA01g10760D	8.87922	8.79981	12.7037	10.9353	28.1569	24.6356	28.7965	23.4208	3.65183	3.59195	6.09532	5.59796	23.7571	23.9106	26.5058	14.7697	17.1654	24.7223	3.20705	3.18247	2.21018	1.95057
BnaA01g10770D	0	0	0	0	0	0	0	0	0	0	0	0	0	0	0	0	0	0	0	0	0	0
BnaA01g10780D	24.0786	27.1127	40.4597	30.0038	48.9674	51.3702	33.787	42.8715	0.964875	0.463673	1.30454	1.9632	50.7054	38.5247	51.8003	27.3516	37.7242	48.5758	0.766476	2.97168	0.881118	0.879939
BnaA01g10790D	1.70213	3.47658	2.41855	1.52383	4.36085	2.65574	3.09701	3.11085	0.781673	0.77636	0	0.132082	3.1004	2.1793	3.78534	2.32003	3.23791	2.28029	0.958445	0.564489	0.969602	0.856263
BnaA01g10800D	13.6482	14.244	18.4107	13.4984	34.8006	37.2526	31.7208	29.3654	12.5506	10.3448	2.82788	2.20034	45.695	51.0269	53.4363	34.2365	42.9319	61.5413	6.36094	6.93941	4.63875	8.23457
BnaA01g10810D	1.6148	1.5567	2.27769	1.75506	1.93275	2.80305	1.65588	2.0819	0.155299	0.0751569	0.230175	0.0558947	8.1855	7.50931	8.63294	4.5727	2.0441	7.68258	0.287016	0.668098	0.425732	0.228317
BnaA01g10820D	0.305594	0.119132	0.059811	0.131782	1.4533	1.21641	0.295113	0.299842	0	0	0	0	0.61314	0.636121	0.379051	0.345654	0	0.385203	0.0568775	0	0	0
BnaA01g10830D	0.222589	0.263604	0.398054	0.294961	1.65111	1.6604	0.0723311	0.147453	0	0	0	0	0.194568	0.230101	0.0546887	0.148869	0.106499	0.743253	0	0.0460402	0	0
BnaA01g10840D	3.64609	2.79007	2.80699	1.68553	5.18682	5.41031	6.90536	6.4449	0.551986	0.664126	0.169932	0.841822	5.20971	8.86277	4.06881	3.25188	4.43882	3.9187	0.728849	0.760106	0	0
BnaA01g10850D	0	0	0	0	0	0	0	0	0	0	0	0	0	0	0	0	0	0	0	0	0	0
BnaA01g10860D	0	0	0	0	0	0	0	0	0	0	0	0	0	0	0	0	0	0	0	0	0	0
BnaA01g10870D	0	0	0	0	0	0	0	0	0	0	0	0	0	0	0	0	0	0	0	0	0	0
BnaA01g10880D	0	0	0	0	0	0	0	0	0	0	0	0	0	0	0	0	0	0	0	0	0	0
BnaA01g10890D	0	0	0	0	0	0	0	0	0	0	0	0	0	0	0	0	0	0	0	0	0	0
BnaA01g10900D	0	0	0	0	0	0	0	0	0	0	0	0	0	0	0	0	0	0	0	0	0	0
BnaA01g10910D	0	0	0	0	0	0	0	0	0	0	0	0	0	0	0	0	0	0	0	0	0	0
BnaA01g10920D	0	0	0	0	0	0	0	0	0	0	0	0	0	0	0	0	0	0	0	0	0	0
BnaA01g10930D	0	0	0	0	0	0	0	0	0	0	0	0	0	0	0	0	0	0	0	0	0	0
BnaA01g10940D	2.52982	0	4.25358	4.47299	0	0	0	1.45336	0	0	4.40688	0	5.2769	1.25947	1.90999	0.89447	4.94237	0.890901	0	0	1.04795	0
BnaA01g10950D	0	0	0	0	0	0	0	0	0	0	0	0	0	0	0	0	0	0	0	0	0	0
BnaA01g10960D	0.403225	0.220557	1.69929	1.42039	0.788668	0.898385	3.27141	2.82972	0.0930547	0.273243	0.321471	0.449554	1.1054	0.878416	0.560079	0.693177	1.36324	0.530927	0.35247	0.350812	0.116079	0.0553508
BnaA01g10970D	1.05169	0.251156	1.04332	0.84789	0.771803	1.41095	1.85065	1.74032	0	0	0.0824737	0.0807991	0.734173	1.33193	1.54466	0.52416	0.498975	1.0853	0	0.0672262	0.0664164	0.12613
BnaA01g10980D	1.18442	0.243662	1.80085	0.712043	3.86616	3.31704	0.28614	0.350099	0	0.0577902	0	0	1.27365	0.452672	3.16926	1.65252	0.208271	3.44925	0	0.077999	0	0
BnaA01g10990D	9.14858	5.36501	7.62281	7.17579	22.501	22.867	19.2015	20.7701	0	0	0	0	12.5261	18.8882	13.7161	5.93312	11.5147	9.9073	0	0	0	0
BnaA01g11000D	137.642	341.845	201.685	173.343	357.443	375.527	120.14	161.838	0	0	8.71698	24.5802	178.173	218.279	175.455	98.9644	112.382	247.583	0	0	0	0
BnaA01g11010D	0	0	0	0	0	0	0	0	0	0	0	0	0	0	0	0	0	0	0	0	0	0
BnaA01g11020D	26.2884	28.4841	25.3774	16.1151	65.1217	51.4147	47.5822	42.0418	20.5171	14.4293	29.1228	28.8844	30.0274	32.7927	26.8207	19.1273	31.2718	68.1086	25.3781	27.0601	4.23321	9.77074
BnaA01g11030D	5.44311	6.24132	6.96851	3.97582	11.9274	7.42381	11.6698	14.4837	0.578824	0	0	0	8.08154	14.54	11.4259	4.56042	1.40594	3.43399	0.637292	1.31027	0.375208	0.518466
BnaA01g11040D	4.09144	4.59975	0	0	0	0	4.0325	8.70491	0	0	0	0	0	0	0	0	0	0	0	0	0	0
BnaA01g11050D	0	0	0	0	0	0	0	0	0	0	0	0	0	0	0	0	0	0	0	0	0	0
BnaA01g11060D	27.219	15.7244	15.527	11.7623	22.3917	21.8366	23.7516	19.4868	0.324262	0.629516	0.985731	0.599616	27.0594	29.0593	17.479	11.7011	17.1941	35.5799	7.03881	5.95284	2.08593	2.01661
BnaA01g11070D	4.60854	5.54285	1.66741	1.67974	3.21372	4.32665	5.20645	5.12667	0.178829	0	0.541131	0	3.55636	4.05474	6.98418	3.62723	5.28609	5.75743	1.85066	2.27197	0.812488	0.880554
BnaA01g11080D	0.16677	0.763147	0.592481	0.513251	0.781804	1.56485	0.511822	0.513709	0	0	0	0	1.27687	1.84566	0	0.176084	0.960348	0.583037	0.0681601	0	0	0
BnaA01g11090D	2.68394	2.30777	10.1932	7.01479	4.54619	4.76819	2.23049	2.98661	0.104002	0	0.15211	0.149455	3.96655	3.83851	5.43173	3.12231	4.30776	3.00035	2.4539	0.569214	0.563811	0.541078
BnaA01g11100D	7.14997	11.3809	24.2618	22.0252	27.2909	28.9342	15.336	20.5975	1.61081	1.21638	2.46256	1.79953	14.5154	18.7414	20.5917	12.9055	7.97586	18.2881	0	0	0	0
BnaA01g11110D	0	0	0	0	0	12.4271	10.4172	5.33362	5.23904	0	76.6863	12.7065	0	0	0	0	0	0	3.23789	7.96913	7.12264	12.3569
BnaA01g11120D	0	0	0.138119	0.155589	0	0	0	0.208959	0	0	0	0	0	0.49008	0.615702	0.414561	1.31491	0	0	0	0	0
BnaA01g11130D	11.9561	11.8099	18.9382	13.743	31.2711	36.7382	47.9798	49.3048	0.764479	1.49734	0.345039	0.470854	33.6021	52.144	11.6477	5.90228	71.7567	55.0009	0	0	0.236246	0.225086
BnaA01g11140D	3.46405	3.65147	13.9471	7.18927	14.7915	21.8889	28.6193	28.0936	7.1626	6.35737	16.157	8.67062	14.2716	18.0261	8.9198	6.29223	22.1486	17.9649	0.272598	0.321452	0.322423	0
BnaA01g11150D	0	0	0	0	0	0	0	0	0	0	0	0	0	0	0	0	0	0	0	0	0	0
BnaA01g11160D	0	0	0	0	0	0	0	0	0	0	0	0	0	0	0	0	0	0	0	0	0	0
BnaA01g11170D	0	0	0	0	0	0	0	0	0	0	0	0	0	0	0	0	0	0	0	0	0	0
BnaA01g11180D	0	0	0	0	0	0	0	0	0.172578	0	0.13095	0	0	0.265187	0	0	0	0.214246	0	0	0	0
BnaA01g11190D	216.006	397.512	316.431	285.464	431.817	268.479	553.889	525.382	90.4754	103.535	29.819	39.4723	462.08	428.802	510.252	265.651	410.374	242.994	1.2072	0.702543	32.9545	21.134
BnaA01g11200D	0.251612	0.156488	1.16565	0.619472	1.52714	1.3679	1.94478	1.17416	0.131806	0	0	0	1.09365	2.36381	0.599181	0.439762	0.3821	2.37245	0	0	0.0771778	0
BnaA01g11210D	1.62062	1.32258	1.38191	2.5423	0	2.92037	0	1.4219	0.698002	2.73247	6.53375	2.76735	0.430674	0	0	0.443664	0.966822	0	0	1.28769	1.70658	2.53865
BnaA01g11220D	0.326902	0.176821	0.0435054	0	0.449634	0.0919422	0	0	0.149871	0.144805	2.58687	0.110082	0	0	0.170589	0.0502033	0.215964	0	0.352544	0.0456659	0.633798	0.213742
BnaA01g11230D	0.389721	0.497806	0.0493506	0.168405	0.70483	0.712278	1.19965	0.851946	0.0883499	0	0.243769	0.120668	0.409106	0.485064	0.341004	0.359081	1.43257	0.397057	0	0	0	0
BnaA01g11240D	0	0	0	0	0	0	0	0	0	0	0	0	0	0	0	5.08865	19.5944	11.2384	0	0	0	0
BnaA01g11250D	0.0594697	0.0570321	0	0	0	0	0.0950666	0.191071	0	0	0.0677924	0	0.128905	0.151919	0.145221	0.0654656	0.284575	0.122198	0.103085	0.0597757	0.178558	0.338348
BnaA01g11260D	0.208297	0	0.259328	0	0	0.524275	0	0	0	0	0	0	0	0.280332	0	0	0.488687	0.212419	0	0	0	0
BnaA01g11270D	0.907641	0.9552	1.6218	1.80533	2.41562	2.84152	1.96602	2.59947	0.379615	0.366885	0.16765	0.505804	1.87872	3.20203	2.48401	1.25683	3.36197	3.04116	0.43849	0.431926	0.394433	0.507987
BnaA01g11280D	0.623534	0.141961	0	0.161123	1.24815	0.300496	0.849383	0.887764	0	0	0	0	0.711628	0.495425	0.455035	1.11004	1.47529	0	0	0	0.141179	0
BnaA01g11290D	6.87238	34.0926	31.2331	29.5056	37.2583	27.963	34.9209	36.2153	1.00921	1.55491	1.89669	1.89794	27.2647	34.8166	32.1866	15.7964	54.0036	37.3099	0	0	0	0
BnaA01g11300D	0	0	0	0	5.13392	5.37702	0	0	0	1.2993	0.607504	1.20719	0	0	0	0	0	0	0.488992	0	0.282295	0.82216
BnaA01g11310D	7.50292	8.45393	12.2292	9.06351	10.8856	10.1092	9.03786	8.03817	5.80155	4.43776	7.05597	5.95511	11.9393	23.2081	16.7521	8.51604	22.076	16.3149	0	4.4418	0	0.178078
BnaA01g11320D	7.63998	11.812	23.757	17.1422	29.8438	18.1601	26.4885	21.4949	4.05849	3.43983	3.23581	2.42528	52.8349	42.1514	32.4219	15.2648	36.3754	39.9739	0	0.938072	0	0
BnaA01g11330D	0.247058	0.117748	0	0	0	0.543165	0.195433	0	0	0	0	0	0.348745	0.144388	0.42657	0.123787	0.519666	0	0	0	0	0
BnaA01g11340D	0.626813	1.74431	1.1603	0.352776	0.683807	1.33176	0.476253	0.962162	0	0	0	0	0.851042	0.721887	1.41224	0.287917	1.63384	0.858483	0	0	0	0
BnaA01g11350D	2.77694	3.61197	1.59948	1.78601	4.03898	2.20569	1.21227	2.03672	0	0	0	0	1.85862	1.63492	1.85156	0.535167	1.76851	2.30115	0	0.497441	0.244403	0
BnaA01g11360D	2.63311	1.61769	5.41846	2.92539	7.34994	11.4383	5.42623	6.8061	2.33691	2.05453	0.135248	3.0522	4.51963	10.573	7.13705	5.79377	5.9563	7.66005	0.751759	0.875105	0.747657	0.828278
BnaA01g11370D	0.992846	0.114439	1.94784	1.52708	2.01052	3.36828	1.77768	1.24822	0.097191	0.186769	0.201209	0.469435	0.948616	1.66387	1.00618	0.846492	1.73802	1.7658	0	0	0	0
BnaA01g11380D	1.31553	0.43399	1.88869	1.16788	2.03866	1.69269	2.49189	1.82207	0.271434	0.0873506	0	0.134457	3.44094	3.56134	1.44794	1.74028	1.38736	4.23059	0.200936	0.117428	0.0585641	0.219939
BnaA01g11390D	14.3846	12.0542	10.1116	6.47845	24.4053	14.0973	14.2926	14.8304	0	0	0	0	15.6243	14.8723	8.44462	7.85532	18.9723	18.0279	0	0	0	0
BnaA01g11400D	38.7389	37.4476	37.6267	24.6651	40.0757	47.9252	37.9154	26.4492	0	0	0	0	89.3181	29.991	27.4031	22.1835	46.8722	23.7469	0	0	0	0
BnaA01g11410D	0	0	0	0.265012	0.244108	0	0	0	0	0	0	0	0	0	0	0	0	0	0	0	0	0
BnaA01g11420D	38.4335	45.4347	39.0494	24.7947	158.135	160.384	65.4925	43.9911	0.22877	0.794336	0.0880462	0.0840242	77.3671	50.2921	61.1461	33.2217	14.0001	49.5428	0	0	0	0
BnaA01g11430D	11.1387	3.57764	3.95283	4.512	5.00936	13.1363	9.67285	13.3155	0	0	0	0	43.3146	24.9301	13.3624	12.8769	23.6249	27.9958	0	0	0	0
BnaA01g11440D	4.33568	9.08	20.7411	10.0263	36.4834	28.3301	14.4691	11.1233	3.70656	3.97607	0	0	5.49677	17.5003	0	0	22.5069	18.0657	0	0	0	0
BnaA01g11450D	0	0	0.51919	0.378373	0	0.727589	0.518903	0	0	0	0	0	0	0.206795	0	0	0	0	0	0	0	0
BnaA01g11460D	0	0	0	0	0	0	0	0	0	0	0	0	0	0	0	0	0	0	0	0	0	0
BnaA01g11470D	0	0	0	0	0	0	0	0	0	0	0	0	0	0	0	0	0	0	0	0	0	0
BnaA01g11480D	0	0	0	0	0	0	0.0967289	0.200138	0	0	0	0	0	0	0	0	0	0	0	0	0	0
BnaA01g11490D	2.80119	3.05599	3.97274	3.23143	8.18278	9.66103	5.5306	4.7299	0.268395	0.782816	1.4448	1.27144	6.08275	6.54022	9.18879	5.40018	6.53166	6.66701	0	0	0	0
BnaA01g11500D	0	0	0.31893	0.154812	0.0947634	0.0960605	0.0752448	0.0768975	0	0	0	0	0.0500765	0.0601871	0.227584	0.356771	0	0.436372	0	0.0485066	0.0963474	0
BnaA01g11510D	0.150569	0.0737375	0	0.0823107	0.15441	0	0	0	0	0	0	0	0.160002	0.0957094	0	0	0	0	0.0637998	0	0	0
BnaA01g11520D	1.33754	0.800708	2.53142	1.37825	4.49211	4.09365	2.33771	3.91602	0	0.0783244	0	0.125645	2.30883	3.29019	2.60568	1.62362	1.13035	2.87278	0.202127	0.186843	0	0.0445019
BnaA01g11530D	7.82583	6.69203	9.78284	7.14183	18.3078	17.6242	3.63462	4.25286	8.16049	6.51101	7.54861	12.6642	14.8616	14.6082	14.6482	8.40351	7.61295	14.4521	5.69119	5.0068	3.0489	3.21467
BnaA01g11540D	1.38249	3.18061	4.21767	0	5.75229	2.51751	2.32683	1.50347	3.81554	0.781658	0.668995	0.668498	3.81345	6.4871	3.80972	2.87219	0	4.50522	5.89996	4.27573	2.61443	2.0829
BnaA01g11550D	3.62607	6.38848	2.12543	1.67742	3.56771	0	2.95658	3.97913	0	0	0	0	3.36506	3.18752	7.22463	5.2296	2.47091	2.75423	0	0	0	0
BnaA01g11560D	0	0	0	0	0	0	0	0	0	0	0	0	0	0	0	0	0	0	0	0	0	0
BnaA01g11570D	0	0	0	0	0	0	0	0	0	0	0	0	0	0	0	0	0	0	0	0	0	0
BnaA01g11580D	0.101939	0.206633	0.261005	0.408109	0.324296	0.970518	1.00393	0.427198	0	0	0	0	2.86321	2.18384	2.5454	1.44438	0.299285	1.74001	0	0	0.16541	0.103504
BnaA01g11590D	0	0	0.0881606	0	0	0	0	0	0	0	0	0	0.0916238	0.10918	0	0	0	0.506852	0	0	0.0905141	0
BnaA01g11600D	11.5627	8.06341	27.0686	21.1878	45.5511	61.3765	50.0499	53.6529	7.79902	7.56123	2.07213	7.51256	39.5711	54.8261	44.374	26.259	25.9303	59.8589	0.838031	1.46211	1.55211	1.94411
BnaA01g11610D	0	0	0	1.00428	0	0	0	0	0	0	0	0	0	1.69877	0	0	0	0.627292	0	0	0	0
BnaA01g11620D	11.2671	9.21889	7.72063	4.32577	20.8248	22.3937	17.5554	16.7491	1.35948	0.960281	0.50913	1.47261	19.0537	22.4985	26.2113	12.0534	29.2917	18.2831	1.05535	1.84624	1.02472	0.784399
BnaA01g11630D	16.1131	17.4203	15.8994	11.7719	31.2228	36.8982	17.836	19.8574	0	0.573363	0.558964	0.418757	17.5202	27.0308	22.8401	14.8003	21.229	17.8073	2.02227	2.12836	2.86297	3.21521
BnaA01g11640D	3.06613	4.64907	6.42046	4.16449	10.768	16.4531	6.80123	11.0421	3.4092	0.923977	4.95075	0.712728	9.74418	5.64321	19.3287	9.29926	10.8488	14.7949	0.506185	0.591145	1.17328	3.26786
BnaA01g11650D	2.31322	0.427372	3.91652	1.95369	10.6878	13.0597	6.75469	6.48923	1.64373	1.70389	0.252674	2.92862	4.10435	4.31954	4.46848	3.37821	0.861222	6.69856	1.24275	1.47712	0.256186	0.452658
BnaA01g11660D	5.64244	4.87213	63.1809	50.7972	145.26	128.689	7.28261	13.5723	1.00614	1.98553	1.02475	1.78911	34.3514	56.8615	10.4209	11.3116	24.3688	103.857	0	0	17.9241	20.5231
BnaA01g11670D	1.37174	2.80104	7.93784	8.91973	29.6279	16.6499	2.2361	3.76342	0	0	0	0.513351	1.86131	0	2.66951	0.462782	1.50657	1.3212	0	0	0	0
BnaA01g11680D	1.02837	0.289314	0.854725	0.650875	1.89949	2.41328	1.40292	1.20329	0	0.0700728	0.284213	0.571101	1.36258	2.76591	2.29236	1.64441	1.00513	3.23389	0	0	0	0
BnaA01g11690D	0.144857	0.484919	0.138792	0.0768766	0.42696	0.426626	0	0	0	0	0	0	0.626526	0.372827	0.536557	0	1.05069	1.22127	0	0	0	0
BnaA01g11700D	0	0	0	0	0	0	0	0	0	0	0	0	0.325321	0	0.180966	0	2.31033	1.26155	0	0	0	0
BnaA01g11710D	0	0	0.171678	0	0	0	0	0	0	0	0	0	0	0	0	0	0	0	0	0.335632	0.337354	0
BnaA01g11720D	0	0	0	0	0	0	0	0	0	0	0	0	0	0	0	0	0	0	0	0	0	0
BnaA01g11730D	0	0	0	0	0	0	0	0	0	0	0	0	0	0	0	0	0	0	0.142369	0	0.166365	0
BnaA01g11740D	0.413317	0.0741237	1.47193	1.07962	4.60066	2.17361	8.01212	8.55364	0.675741	1.14837	0.293566	1.33589	1.63218	1.35658	0.901289	0.812511	1.18191	3.45861	0	0	0	0
BnaA01g11750D	0	0	0	0	0	0	0	0	0	0	0	0	0	0	0.634147	0	0	0	0	0	0	0
BnaA01g11760D	8.6007	13.9874	1.09893	0.829779	0	0.274415	0.199307	0	1.83521	2.69536	17.751	10.2625	9.1426	0	0.447335	2.29831	0.143613	0	21.6014	6.07832	1.2327	0.662737
BnaA01g11770D	0	0.313167	0	0.38776	0	0	0.474899	0.485129	0	0	0	0	0	0	0	0.614401	0.318274	0	0	0	0	0
BnaA01g11780D	2.12108	1.53613	0	0	0	0	0	0	0	0	0	0	0	0	0	0	0	0	0	0	1.8526	0.886824
BnaA01g11790D	0.255715	0.507248	0.253574	0.215073	0.396033	0.128366	0.310085	0	0.104506	0	0.463652	0.0762063	0.142694	0	0.388998	1.68771	0.540072	0.0664917	0	0	0	0
BnaA01g11800D	929.105	701.56	297.123	288.594	540.638	530.01	507.408	479.032	13.3241	18.117	27.3792	13.6304	1214.9	963.774	1699.25	818.699	968.729	1078.63	0.124137	0.435478	0.145696	0.829124
BnaA01g11810D	0	0	0	0	0	0	0	0	0	0	0	0	0	0	0	0	0	0	0	0	0	0
BnaA01g11820D	0	0	0.463074	0	0	0	0	0	0	0	0	0	0	0	0	0	0	0	2.35817	0.795121	0	0
BnaA01g11830D	0.545785	0	0	0	0	0	1.83613	0.935719	0	0	0	0	0.5844	0	0.644858	1.17207	0	0.589973	0	0	0	0
BnaA01g11840D	13.6722	7.25647	4.73283	5.39362	15.8395	11.9095	13.8638	10.1715	1.18986	1.69572	0.264686	2.87329	86.9401	19.8301	21.1291	11.701	5.7719	22.9956	11.0812	2.40273	0	0
BnaA01g11850D	0	0	0	0	0	0	0	0	0	0	0	0	0	0	0	0	0	0	0	0	0	0
BnaA01g11860D	39.8568	56.945	75.7482	48.5221	151.1	147.64	17.8366	15.5162	12.6987	28.4541	0.785202	4.60779	66.4214	75.0356	53.7006	25.028	47.9249	89.4461	24.3574	25.8859	19.5726	21.6039
BnaA01g11870D	33.6291	10.7354	18.5532	7.61039	51.7106	46.9455	59.2334	51.0109	12.2379	13.2717	0.275137	13.3653	45.334	35.0656	33.3409	28.1573	8.96418	32.5526	0.55914	0.46783	0	0
BnaA01g11880D	0	0	0	0	0	0	0	0	0	0	0	0	0	0	0	0	0	0	0	0	0	0
BnaA01g11890D	0	0	0	0	0	0	0	0	0	0	0	0	0	0	0	0	0	0	0	0	0	0
BnaA01g11900D	0	0	0	0	0	0	0	0	0	0	0	0	0	0	0	0	0	0	0	0	0	0
BnaA01g11910D	0	0	0	0	0	0	0	0.22906	0	0	0	0	0	0	0	0	0	0	0	0	0	0
BnaA01g11920D	0.626408	0.553312	0.963987	0.622739	0.7456	1.92101	0.79584	0.695846	0	0.221727	0	0.0874104	1.71446	2.84978	0.932648	0.836328	0.496826	2.89897	0	0	0	0
BnaA01g11930D	0.831647	0.508272	2.98562	1.78231	1.86664	1.48262	1.981	1.9272	0.636452	0.204424	1.02015	1.11345	5.15186	3.95214	1.64535	0.629441	2.90973	1.76239	1.13022	0.916446	0.130778	0.563103
BnaA01g11940D	10.8031	8.8773	10.7801	6.20316	36.4688	37.4493	16.4032	11.2543	2.31875	3.76633	0.721081	2.66265	16.197	22.9785	12.9811	11.7311	12.1145	19.493	3.75528	5.56464	2.9584	2.65889
BnaA01g11950D	2.64743	2.46002	2.85315	1.80668	4.41735	2.34839	1.70034	1.74156	0	0	0	0	2.16209	1.8982	2.44292	1.08789	7.25247	2.96804	0	0	0	0
BnaA01g11960D	2.11334	4.52278	2.55215	0.475064	9.21482	9.1249	7.68864	4.95308	0	0	0	0	9.88094	4.93544	7.82429	7.05055	12.5481	8.79145	0	0	0	0
BnaA01g11970D	0	0	0	0	0	0	0	0	0	0	0	0	0.147753	0	0	0	0	0	0	0	0	0
BnaA01g11980D	0	0	0	0	0	0	0	0	0	0	0	0	0	0	0	0	0	0	0	0	0	0
BnaA01g11990D	0	0	0	0	0	0	0	0	0	0	0	0	0.0699072	0	0	0	0	0	0	0	0	0
BnaA01g12000D	0	0	0	0	0	0	0	0	0	0	0	0	0	0	0	0	0	0	0	0	0	0
BnaA01g12010D	11.5303	14.2358	11.4191	9.00107	32.9667	21.9519	15.2221	14.1962	0	0	0	0	18.1917	24.0544	24.3141	8.6152	9.33829	5.91787	0	0	0	0.121818
BnaA01g12020D	2.07925	2.89771	2.36147	2.17166	6.13756	5.24038	5.77433	6.13606	0.88788	1.27984	3.86915	1.2925	2.24001	2.72459	1.97055	1.40674	1.69731	2.46822	4.85751	2.69921	1.10479	1.00698
BnaA01g12030D	0	0	0	0	0	0	0	0	0	0	0	0	0	0	0	0	0	0	0	0	0	0
BnaA01g12040D	17.7481	29.1117	144.237	120.442	93.428	74.0967	72.4848	76.2114	0	0	0	0	66.0182	79.0895	78.4502	40.3153	100.85	40.0336	0	0	0	0.440566
BnaA01g12050D	0	0	0	0	0	0	0	0	0	0	0	0	0	0	0	0	0	0	0	0	0	0
BnaA01g12060D	2.36511	5.21839	5.58633	6.36371	4.6916	3.08947	6.249	4.72839	0	0	0	0	10.2582	9.70461	7.48189	8.24151	38.1576	14.2201	4.80235	3.00106	4.84189	4.78092
BnaA01g12070D	0	0	0	0	0	0	0	0	0	0	0	0	0	0	0	0	0	0	0	0	0	0
BnaA01g12080D	8.54627	12.8003	15.9925	15.5795	26.7839	19.5929	28.2075	18.0409	2.16371	0.956422	6.17345	1.47755	24.1629	22.038	26.0821	13.0179	46.2873	32.4893	0.250358	0.145841	2.7348	1.12966
BnaA01g12090D	1.93423	1.793	3.35155	2.27042	11.8767	7.28014	6.58553	6.11144	0	0	0	0	6.33129	9.12166	2.47465	8.08913	28.4746	11.5208	0.311646	0	0	0
BnaA01g12100D	1.47013	3.67737	5.14834	3.7861	3.715	5.86647	3.47629	2.54518	2.66539	2.96276	0.577925	1.77356	7.26821	5.6325	9.8762	1.57616	3.40857	6.03671	3.81244	1.52064	0.976578	0.510074
BnaA01g12110D	8.94533	7.23165	2.27497	1.30005	5.93167	17.3814	28.3858	22.9649	0	0	17.9923	3.25782	16.7027	12.7271	8.24024	5.37189	22.7923	8.69014	2.75272	0	0	0
BnaA01g12120D	0	0	0	1.2722	0	0	1.33882	0	0	0	3.22583	0	0	1.05804	1.8393	0	0	3.9432	0	0	0	0
BnaA01g12130D	4.0704	5.80122	8.35227	6.2365	23.3952	20.1764	6.31859	4.85212	0	0	0	0	0.693448	1.21674	0	0	6.28223	1.88337	0	0	0	0
BnaA01g12140D	7.65732	6.46951	5.7821	4.98239	9.52837	10.5478	8.04971	9.66424	0.835198	1.61819	0.906394	0	22.3194	18.5844	13.8163	9.27464	14.727	12.428	1.28507	2.73242	1.7042	1.92603
BnaA01g12150D	0	0	0.276683	1.54752	0.295346	0	0.209557	0.428727	0.211035	0.20583	4.57435	0.153984	1.07756	0.16277	2.28854	1.10347	0	0	0.342704	0.399567	0.659719	0
BnaA01g12160D	2.11913	2.37528	4.82651	3.55506	7.98492	7.90248	6.83079	6.15214	0	0.427969	0.658646	0.739036	8.49259	4.72823	7.89027	5.1201	5.79444	5.92511	0.161009	0	0	0
BnaA01g12170D	3.36852	1.91498	5.05495	3.89239	5.51083	4.06447	3.50891	3.38624	1.39968	2.11232	1.02464	2.11771	4.96876	2.58648	4.98687	2.4105	3.67493	2.32513	6.19519	7.66221	3.08018	3.9621
BnaA01g12180D	0	0.577395	0.148959	0.169699	0	0.299842	0	0	0	0	0	0	0.453058	0.176936	0	0	0.158909	0	0	0	0	0
BnaA01g12190D	79.434	46.3298	59.9046	37.364	112.129	115.583	62.4774	123.728	0.969524	3.80977	0.863522	5.56456	68.4737	94.7194	51.1477	32.4752	98.1643	161.198	0	0	0	0.559463
BnaA01g12200D	17.6691	13.5809	16.1641	11.1685	33.3611	37.6513	49.7126	39.1076	6.44516	7.45816	13.6796	12.9487	37.3807	28.5763	36.4176	19.7914	24.1508	32.9455	0	0	0	0
BnaA01g12210D	33.6904	0	0	0	0	0	0	0	0	0	0	0	0	0	0	0	0	0	0	0	0	0
BnaA01g12220D	0	0	0	0	0	0	0	0	0	0	0	0	0	0	0	0	0	0	0	0	0	0
BnaA01g12230D	0	0	0	0	0	0	0	0	0	0	0	0	0	0	0	0	0	0	0	0	0	0
BnaA01g12240D	0	0	0	0	0	0	0	0	0	0	0	0	0	0	0	0	0	0	0	0	0	0
BnaA01g12250D	0	0	0	0	0	0	0	0	0	0	0	0	0	0	0	0	0	0	0	0	0	0
BnaA01g12260D	0	0	0	0	0	0	0	0	0	0	0	0	0	0	0	0	0	0	0	0	0	0
BnaA01g12270D	3.64132	9.61911	0.691903	2.45388	8.54805	8.0494	7.13608	4.80162	0.350716	0.336911	0	0.369319	5.10297	4.74023	9.375	3.53291	14.0785	7.01848	0	0	0	0
BnaA01g12280D	5.22894	5.79098	5.718	5.47967	9.85368	7.86154	7.76893	6.11098	0.0837103	0.416002	0.184943	0.669236	7.34769	8.95231	9.94156	4.94599	14.3497	10.5567	0.0904734	0	0.105096	0.0499292
BnaA01g12290D	1.8355	0	3.44065	2.85061	19.6795	21.6835	3.02489	2.13368	0.944789	0.897786	0	1.02279	11.3205	12.9702	12.5818	4.52521	2.00466	12.0512	0	0	0	0
BnaA01g12300D	0	0	0	0	0	0	0	0	0	0	0	0	0	0	0	0	0	0	0	0	0	0
BnaA01g12310D	8.59193	11.0724	10.6983	7.63542	32.4196	27.8159	14.4379	15.8217	0.237476	0	0	0	12.0886	14.265	6.57082	7.00133	7.26526	9.03283	0.98477	0.790262	0.534163	0.126623
BnaA01g12320D	3.90338	2.62445	0.255773	0.280506	2.78627	2.40156	1.39754	2.67125	0	0.203947	0.492676	0.159383	2.61279	1.10451	2.29375	1.04992	1.54944	3.60955	0.111321	0	0.255095	0.24867
BnaA01g12330D	0	0	0	0	0	0	0	0	0	0	0	0	0	0	0	0	0	0	0	0	0	0
BnaA01g12340D	0	0.887862	0	0	0	0	0	0	0.675721	0	0	0	0.413129	0	0	0	0	0	0	0	0	0
BnaA01g12350D	0	0	0	0	0	0	0	0	0	0	0	0	0	0	0	0	0	0	0	0	0	0
BnaA01g12360D	5.89821	6.06595	14.283	7.76348	24.8617	24.6364	12.6527	11.1952	2.90475	1.09015	2.44965	2.53851	16.9717	18.8206	28.4961	21.0834	9.27231	21.8281	0	0	0	0
BnaA01g12370D	0	0	0	0.642448	0.406554	0.788693	0	0	0.27793	0	0	0	0.557891	0	0.396999	0.179635	0.188974	0	0	0	0	0
BnaA01g12380D	7.97908	6.8293	3.38801	4.32076	11.7262	12.4621	10.9929	7.49047	0.280617	0.138583	0.247244	0	11.2329	16.6334	17.0444	9.8462	14.2131	11.8887	0	0	0.085005	0
BnaA01g12390D	5.44367	2.07385	5.66817	3.76976	9.31985	8.68983	8.20942	7.17838	0	0	0	0	7.49054	12.2122	8.24156	6.63791	3.22936	15.0941	0	0.112027	0	0
BnaA01g12400D	0.542445	0.61807	0.307952	0.626367	0.523821	1.28233	0.898824	0.715634	0	0	0.0820474	0.151924	1.26059	2.00328	0.959769	0.259225	1.91647	0.609852	0	0	0	0
BnaA01g12410D	0	0	0	0	0	0	0	0	0	0	0	0	0	0	0	0	0	0	0	0	0	0
BnaA01g12420D	0	0	0	0	0	0	0	0	0	0	0	0	0	0	0	0	0.161358	0	0	0	0	0
BnaA01g12430D	6.05052	3.49846	6.99574	7.78505	5.55802	8.20852	5.49494	7.42247	1.81937	4.76844	4.35698	2.97911	10.2683	5.30384	4.40199	3.47949	12.6276	5.01439	4.95592	3.2337	0.623454	0
BnaA01g12440D	0.246954	0	0.491235	0	0	0	0	0	0	0	0	0	3.57628	1.25995	3.29829	1.33981	1.16062	0.778157	0	0	0	0
BnaA01g12450D	6.18363	5.74775	6.55888	4.20178	19.7945	20.3202	23.3511	18.316	8.24224	7.51411	23.8784	8.59105	23.5705	15.8033	15.4349	7.7152	5.31422	20.4931	3.95019	6.46848	0	0.201057
BnaA01g12460D	0.577294	0.609158	0.612518	0.235477	0.444945	0	0.928926	0.316133	0	0	0	0	0.405805	0.253839	0.230328	0.199756	0.87939	0	0	0	0	0
BnaA01g12470D	0.660415	0.141818	0.991197	0.797269	1.20656	1.05952	0.59112	1.20432	0	0	0	0	1.8585	3.02656	1.94867	1.50559	0.423499	0.965051	0.126339	0	0	0
BnaA01g12480D	2.49585	1.18882	1.0611	0.81046	1.99063	0.390772	1.08859	2.53812	0.268892	0	0.283289	0.5038	1.71826	3.75991	0.77836	1.22447	1.28604	1.15906	0.429459	1.16821	0	0
BnaA01g12490D	0.287653	0.515083	0.114287	0.257476	0.116792	0.466339	0.752926	0.477642	0	0	0.205422	0	0.97181	0.593615	0.997681	0.764272	2.24682	0.352286	0	0	0	0
BnaA01g12500D	0	0	0	0	0	0	0	0	0	0	0	0	0	0	0	0	0	0	0	0	0	0
BnaA01g12510D	23.74	28.5796	30.6203	21.5587	55.3472	69.6381	52.3082	58.9372	13.3466	8.39688	6.47393	10.2501	27.1862	41.3348	38.8038	20.8905	63.7953	73.2357	0	0	0	0
BnaA01g12520D	1.54032	1.36477	0	0.235432	1.32527	0.979546	2.11814	2.95669	0	0	0	0	1.27032	2.84717	0.315189	0.284956	0.480741	2.96319	0	0	0.0561911	0.0529436
BnaA01g12530D	14.2426	13.9489	3.9059	0.927941	206.909	192.346	15.7742	10.8321	0	0.368998	0.145522	0	131.645	230.905	42.0992	29.6815	2.55776	2.12296	0	0	0	0
BnaA01g12540D	83.8567	187.619	172.642	167.784	201.181	175.38	343.299	295.283	0	1.51522	0.375635	0.558475	282.62	296.34	301.85	135.68	716.441	355.034	0.131941	0.307573	0.153426	0.294652
BnaA01g12550D	0	0	0	0	5.84644	0	2.25184	0	0	0	0	0	0	0	0	0	0	0	0	0	0	0
BnaA01g12560D	2.61406	2.06171	1.36982	0.880816	4.20726	4.38677	1.11297	3.77452	0	0.156342	0	0	3.12814	3.8946	3.64997	1.38821	2.98826	3.33839	0	0	0	0
BnaA01g12570D	7.19248	5.95794	2.29374	2.24364	10.2303	9.24755	7.4094	6.64948	0	0	0.344351	0	9.90587	10.2109	4.97481	2.36848	1.48362	7.25714	0	0	0	0
BnaA01g12580D	0	0	0	0	0	0	0	0	0	0	0.149929	0	0.0642935	0	0	0	0	0	0	0	0	0
BnaA01g12590D	0.610201	0.552418	0.423531	0.68524	0.128101	0.511336	0.299561	0.407378	0	0	1.34273	0	0.401371	1.40234	2.9092	0.94372	0.573535	0.495523	0	0	0	0
BnaA01g12600D	0	0	0	0	0	0	0	0	0	0	0	0	0	0	0	0	0	0	0	0	0	0
BnaA01g12610D	0	0	0	0	0	0	0	0	0	0	0	0	0	0	0	0	0	0	0	0	0	0
BnaA01g12620D	0	0	0	0	0	0	0	0	0	0	0	0	0	0	0	0	0	0	0	0	0	0
BnaA01g12630D	0	0	0	0	0	0	0	0	0	0	0	0	0	0	0	0	0	0	0	0	0	0
BnaA01g12640D	0	0	0	0	0	0	0	0	0	0	0.177389	0.345779	0	0	0	0	0	0	0.25339	0	0	0
BnaA01g12650D	1.04685	0.762378	0.190608	0.285115	0.400243	0.133004	0.30611	0.209766	0.10439	0	0.375776	0	0	0	0	0	0.955429	1.08491	0.114186	0.0665577	0	0
BnaA01g12660D	0.931844	0.834681	0.457054	0.171213	0.481452	0.159977	0.47969	0.246648	0.242955	0.238582	0.820952	0	0.322393	2.05168	0.526525	0.563304	1.26342	0.0731341	0.0678774	0.316839	0.235752	0.0745688
BnaA01g12670D	0.275397	1.8317	0.0703579	0.0792651	0.293636	0.731706	1.0204	0.809084	0.344553	0	1.29073	0.0831897	0.379192	0.178685	2.01363	0.307356	1.22747	0.423846	0	0	0	0
BnaA01g12680D	1.46193	1.56245	2.92	1.87974	0.855178	0.834503	4.7679	4.7407	0	0	0	0	6.47154	7.37823	10.7924	6.66061	3.65783	2.18459	0.350483	0.952357	0	0
BnaA01g12690D	0.136797	0	0	0.162024	0	0	0	0.116727	0	0	0	0	0	0.0906784	0	0	0.16511	0	0	0	0	0
BnaA01g12700D	0	0	0	0	0	0	0.383439	0.768375	1.59773	0.415372	5.44317	2.68621	0	0	0.283426	0.25912	0.294075	0	0	0	0	0
BnaA01g12710D	0	0	0	0	0	0	0	0	0	0	0	0	0	0	0	0	0	0	0	0	0	0
BnaA01g12720D	0	0	0	0	0	0	0	0	0	0	0	0	0	0	0	0	0	0	0	0	0	0
BnaA01g12730D	0	0	0.120814	0.0682372	0	0.249708	0.0998394	0	0.202055	0.19788	0.845938	0	0.135418	0.0800805	0	0	0	0	0	0.129924	0	0
BnaA01g12740D	0.384585	0.0725803	0.948805	0.58792	2.11091	2.52551	1.13081	1.43281	0.188831	0.120708	0.151158	0.299611	1.40978	2.24456	2.02975	1.67788	0.318322	1.61361	0.477669	0.421741	0	0
BnaA01g12750D	0	0	0	0	0	0	0	0	0	0	0	0	0	0	0	0	0	0	0	0	0	0
BnaA01g12760D	0	0	0	0	0	0	0	0	0	0	0	0	0	0	0	0	0	0	0	0	0	0
BnaA01g12770D	0	0	0	0	0	0	0	0	0	0	0	0	0	0	0	0	0	0	0	0	0	0
BnaA01g12780D	0	0	0	0	0	0	0	0	0	0	0	0	0	0	0	0	0	0	0	0	0	0
BnaA01g12790D	0.151052	0.375901	0.225537	0.0860595	0.318474	0.155824	0	0	0	0	0.19218	0	0.487138	0	0.182062	0.240456	0	0.151704	0	0	0	0
BnaA01g12800D	0.489232	0.894051	1.44827	1.52225	2.45334	2.3222	1.12117	0.913351	0.114954	0.336504	0.845645	0.579587	2.95943	4.49199	0.682717	0.98616	4.60285	3.64077	0	0.0691169	0	0
BnaA01g12810D	0.432188	1.47773	0.296876	0	0	0	0.233135	0.723597	0	0	0.717812	0.51205	0.299058	0.360123	0.345238	0.154221	0.489414	0.287078	0.35596	0	0	0
BnaA01g12820D	0.183446	0.439243	0.177784	0.104364	1.70733	2.24917	0.574444	0.721587	0	0	0	0	0.75318	0.450222	0.642389	0.187248	0.207101	0.717248	0	0	0	0
BnaA01g12830D	0	0	0	0	0	0	0	0	0	0	0	0	0	0	0	0	0	0	0	0	0	0
BnaA01g12840D	0	0	0	0	0	0	0	0	0	0	0	0	0	0	0	0.139012	0	0.134141	0	0	0	0
BnaA01g12850D	0	0	0	0	0	0	0	0	0	0	0	0	0	0	0	0	0	0	0	0	0	0
BnaA01g12860D	2.99315	4.27278	4.93283	5.68166	14.0712	10.888	7.54436	0	0	0	0	0	1.32964	0	0	0	1.65319	2.91891	0	0	0	0
BnaA01g12870D	1.10529	0.974027	2.62199	2.61787	4.18826	3.1367	3.32721	4.81759	0.345632	0.336503	0.19678	0	13.4368	18.9953	3.24821	3.75324	5.3938	9.7299	0	0	0	0
BnaA01g12880D	0	0	0	0	0	0	0	0	0	0	0	0	0	0	0	0	0.223581	0	0	0	0	0
BnaA01g12890D	15.484	9.8007	0	0	169.169	116.931	32.1762	19.4764	2.96028	2.1714	0.301559	1.43446	58.5488	64.9986	10.8015	0	2.00779	4.67431	0	0	0	0
BnaA01g12900D	98.9748	68.7796	59.3608	45.0227	207.873	208.693	156.068	141.733	42.6528	41.6718	30.5437	36.988	197.858	212.469	102.937	131.465	87.7759	146.431	7.6172	0	7.74769	8.74445
BnaA01g12910D	1.6978	0.905213	0.129251	0.438167	0.407579	1.50773	0.642007	0.881467	0.218598	0	0.429492	0.0814787	2.004	1.17741	1.3665	1.58297	0.928343	1.75477	0.290831	0	0	0
BnaA01g12920D	4.17871	4.78941	1.53666	0.843569	1.17034	0.785701	2.58133	3.17518	0.523373	0.404445	1.83041	0.304113	0.964916	2.35798	3.38444	1.53577	8.89117	15.4918	0.05469	0	0	0.0607557
BnaA01g12930D	23.3623	13.1857	6.96905	8.34692	12.3276	11.791	11.1874	10.0543	3.68037	2.48489	16.0117	4.32551	12.0707	15.2572	14.8488	7.24496	18.0557	11.6755	3.63245	6.35869	5.3398	4.92981
BnaA01g12940D	6.25934	2.44108	0	0	0.368323	0.370305	0.295315	0.902647	0	0	0.82617	0.0688075	0.269183	0.393691	3.33041	2.05686	2.55597	0.127338	0.162309	0.0627976	0.808823	0.23771
BnaA01g12950D	0	0	0	0	0	0	0	0	0	0	0	0	0	0	0	1.93829	0	0	0	0	0	0.0295153
BnaA01g12960D	0	0	0	0	0	0	0	0	0	0	0	0	0	0	0	0	0	0.123479	0	0	0	0
BnaA01g12970D	0	0	0	0	0	0	0	0	0	0	0	0	0	0	0	0	0	0	0	0	0	0
BnaA01g12980D	0	0	0	0	0	0	0	0	0	0	0	0	0	0	0.0766741	0	0	0	0	0	0	0
BnaA01g12990D	0	0	0	0	0	0	0	0	0	0	0	0	0	0	0	0	0	0	0.116963	0	0	0
BnaA01g13000D	3.79644	3.53903	10.5931	7.19316	2.47189	2.34534	6.09395	8.53162	0	0	0	0	12.8774	1.87213	10.8913	4.26842	6.21149	5.64787	4.42158	3.79448	5.94445	2.26537
BnaA01g13010D	0	0	0	0	0	0	0	0	0	0	0	0	0	0	0	0	0	0	0	0	0	0
BnaA01g13020D	0	0	0	0	0	0	0	0	0	0	0	0	0	0	0	0	0	0	0	0	0.391194	0
BnaA01g13030D	0	0	0.237639	0	0.489537	1.45035	0	0	0	0	0	0	0.119645	0.286145	0.393213	0.710399	0.382109	0.109926	0	0	0	0
BnaA01g13040D	25.8752	34.8595	27.9885	24.49	37.1201	38.9054	42.9067	33.6526	0.196591	0.583349	0.303235	0.147164	32.0712	43.8133	21.2844	18.9579	43.0131	30.9817	1.66945	0.647509	3.45738	2.59041
BnaA01g13050D	0.730947	0.0395163	0.11589	0.0908045	1.71721	2.34385	0.98544	0.857662	0	0	0	0	2.05378	2.1907	1.14776	0.981532	0.307781	0.543435	0.175812	0.614548	0.165951	0.188554
BnaA01g13060D	0.376291	0	0	0	0	0	0	0	0	0	0.479573	0	0	0	0	0	0	0	0	0	0	0
BnaA01g13070D	0	0	0	0	0	0	0	0	0	0	0	0	0	0	0	0	0	0	0	0	0	0
BnaA01g13080D	5.74884	4.51727	1.95309	3.43282	6.39802	11.8276	3.58364	4.43233	0	0	0	0	12.9814	10.8113	15.6591	1.28718	6.68134	13.1713	0	4.72583	1.61346	2.07291
BnaA01g13090D	1.38641	1.87041	3.80454	2.39365	1.46313	1.25692	0.921607	1.27946	0	0	0	0	2.06303	1.95848	0.88691	0.88422	1.28026	1.99028	0	2.12631	0.188486	0.347053
BnaA01g13100D	0	0	0	2.42687	0	0	0	0	0	0	0	0	0	0	0	0	0	0	0	0	0	0
BnaA01g13110D	0	0	1.53506	1.68485	0	0	0	0	0	0	0	0	0	0	0	0	0	0	0	0	0	0
BnaA01g13120D	0	0	0	0	0	0	0	0	0	0	0	0	0	0	0	0	0	0	0	0	0	0
BnaA01g13130D	17.5443	15.8019	42.7912	30.2133	14.8175	13.017	11.3414	10.1001	19.9859	19.103	2.35448	15.8746	32.2045	19.6262	24.0709	17.9714	16.6968	18.6489	7.1732	6.37965	10.8939	13.2359
BnaA01g13140D	0	0	0	0.0935532	0	0	0	0	0	0	0	0	0	0	0	0	0	0	0.507929	0	0	0
BnaA01g13150D	0	0	0	0	0	0	0	0	0	0	0	0	0	0	0	0	0	0	0	0	0	0
BnaA01g13160D	0	0	0	0	0	0	0	0	0	0	0	0	0	0	0	0	0	0	0	0	0.229995	0
BnaA01g13170D	38.5482	18.6181	24.0022	17.467	0	0	0	0.319142	0	0.304618	0	0	71.6967	79.9658	72.5041	39.9	0	102.167	0.474672	0	0.18176	0.177055
BnaA01g13180D	0	0	0	0	0	0	0	0	0	0	0	0	0	0	0	0	0	0	0	0	0	0
BnaA01g13190D	1.78844	1.99786	0	0	1.79962	1.61996	0.966936	1.96904	0	0	0	0	0	0	0	0	0	0	0	0	0	0
BnaA01g13200D	0	0	0	0	0	0	0	0	0	0	0	0	0	0	0	0	0	0	0	0	0	0
BnaA01g13210D	0	0.112123	0.566564	0.396395	1.78631	0.763795	2.98022	1.61226	0	0	0	0	1.36702	0.928494	0.60696	0.798267	0	0.129864	0	0	0	0
BnaA01g13220D	4.97242	1.17371	2.71782	1.58755	3.87742	3.58449	4.2122	3.97757	0	0.291917	0.0416546	0.497794	3.86182	7.22834	7.5767	7.20487	1.34758	8.04987	0	0.703127	0	0.0705238
BnaA01g13230D	0	0	0	0	0	0	0	0	0	0	0	0	0	0	0	0	0	0	0	0	0	0
BnaA01g13240D	0	0	0	0	0	0	0	0	0	0	0	0	0	0	0	0	0	0	0	0	0	0
BnaA01g13250D	0	0	0	0	0	0	0.514037	1.04231	0	0	0	0	0	0	0	0	0	0	0	0	0	0
BnaA01g13260D	0	0	0	0	0	0	0	0	0	0	0	0	0	0	0	0	0	0	0	0	0	0
BnaA01g13270D	0	0	0	0	0	0	0	0.200889	0	0	0	0	0	0	0	0	0	0	0	0	0	0
BnaA01g13280D	135.574	145.825	11.7968	7.40252	68.1032	48.9402	84.2864	28.3592	24.3217	29.6479	10.2399	87.1976	204.411	12.3388	2.3286	30.3645	3.97591	1.39451	0.585067	31.0245	0.578927	0.110382
BnaA01g13290D	1.24443	0.935632	0	0	0.573619	0	0.349511	0.357137	0	0	0	0	0.439562	0.270252	0.731742	0.428821	0.233426	0	0	0	0	0
BnaA01g13300D	5.66835	4.90916	9.87279	5.74308	32.5135	29.7969	14.3649	14.7099	3.20115	2.58241	0.290146	5.47677	15.3291	13.1288	23.0017	8.00736	8.34517	20.3665	0	0.191739	0	0
BnaA01g13310D	29.1508	43.41	103.613	69.1941	108.001	146.281	140.707	125.796	2.79471	2.35139	5.29338	2.56867	94.1483	76.5913	101.656	72.324	138.444	100.399	0	0.202396	0.613053	0.577469
BnaA01g13320D	10.2981	7.33508	8.7486	7.3103	20.2578	21.6377	19.1657	19.4732	1.22928	0.401042	1.15425	2.43607	7.1463	6.00038	13.6691	4.77431	9.7293	28.014	0.160617	0.124343	0.123319	0
BnaA01g13330D	20.6418	10.9856	13.1371	10.0478	26.7859	23.6997	24.8842	21.2744	4.3712	3.45492	4.42487	4.2865	15.8437	16.18	16.0096	7.74242	11.8483	20.0502	2.33717	0.98417	1.06756	0.84784
BnaA01g13340D	4.79108	3.55603	5.35576	3.41709	2.23873	2.52019	0.979663	1.75889	0	0.575519	0.141985	0.137879	6.43593	8.43743	7.02249	0.784208	6.73952	1.78603	0	0	0	0
BnaA01g13350D	0.34347	0	0	0	3.07509	0.892736	0	0	0	0	0.458969	0	0	0	0	0	0	0.34963	0	0	0	0
BnaA01g13360D	0	0	0	0	0	0.13279	0	0	0	0	0	0	0	0	0	0	0	0.190311	0	0	0	0
BnaA01g13370D	9.80319	20.0909	16.1097	10.1472	0	0	0	0	0	0	0	0	0	0.898969	0.661162	0	0	0	0	0	0	0
BnaA01g13380D	0	0	0	0	0	0	0	0	0	0	0	0	0	0	0	0	0	0	0	0	0	0
BnaA01g13390D	13.6862	19.4613	15.3143	12.6254	29.5926	27.2298	40.7186	36.2255	1.28588	1.27399	7.21505	5.389	38.7344	38.3397	36.8217	19.7276	41.9772	23.3846	0	0	0	0
BnaA01g13400D	16.0916	11.5706	8.72159	5.24802	19.1377	18.6839	14.9802	18.2495	0.350947	0.685082	0.105753	0	27.0337	27.4668	20.364	11.8154	12.2312	17.5091	0.589245	0.749685	0.136998	0.196699
BnaA01g13410D	0	0	0	0	0	0	0	0	0	0	0	0	0	0	0	0	0	0	0	0	0	0
BnaA01g13420D	6.17727	2.68149	1.7912	1.71787	2.08725	4.08287	4.59416	6.0735	0	0	0.322118	0	3.00692	3.3207	1.81062	1.39716	0.549809	1.30831	0	0	0	0
BnaA01g13430D	27.4466	14.5628	49.4418	20.7872	130.96	149.863	58.4776	46.4468	16.9597	16.2409	2.85443	25.6465	36.0251	27.4034	46.8309	32.1593	4.39767	28.9754	0	22.3745	0	0.0562484
BnaA01g13440D	4.91801	3.19717	1.37471	1.22506	0.888466	0.57145	1.07239	0.441767	0.212218	0.423186	0	0	0.278855	0.814751	1.05951	0.273122	1.15753	1.90712	0	0.140383	0	0
BnaA01g13450D	0	0	0	0	0	0	0	0	0	0	0	0	0	0	0	0	0	0	0	0	0	0
BnaA01g13460D	7.9224	4.95645	6.30885	3.37197	10.0971	10.8663	4.17104	5.67103	0.487882	0.316453	0.280924	2.31239	7.73988	11.232	6.24462	6.22616	0.881939	3.7824	0	0.626605	3.78295	5.22457
BnaA01g13470D	17.7705	18.9839	14.9533	13.5046	12.7075	12.0668	8.70938	7.47595	2.73245	2.22999	15.1547	4.719	15.8337	12.6697	12.7454	6.49019	19.0231	13.7484	0.215896	0.0630132	0.125142	0.119063
BnaA01g13480D	7.79635	6.26573	12.4588	6.30587	20.2318	25.7872	13.7762	12.3033	0	0.155645	0.378845	0.842904	7.87709	21.0116	6.968	10.1134	8.01157	8.03051	0	0	0	0
BnaA01g13490D	0	0	0	0	0	0	0	0	0	0	0	0	0	0	0	0	0	0	0	0	0	0
BnaA01g13500D	0.796924	2.58785	0.642039	0.699481	2.84243	1.27458	0.852111	0	0	0	9.27593	0.327966	0.824236	0.720423	1.54071	0.54798	6.22052	0.833741	0	0	0	0
BnaA01g13510D	31.0745	114.652	97.8727	117.746	169.613	112.416	145.235	117.684	0	0.570498	0.251491	0	74.1863	71.8926	58.7491	25.3491	128.489	67.0287	0.939114	0	0.183858	0
BnaA01g13520D	2.22819	3.42394	0.813144	2.48028	0	0	0.398602	0	0	0	0	0	5.01024	2.51717	4.68481	2.86396	5.01741	5.20941	0	0	0	0
BnaA01g13530D	3.85345	4.16812	6.75123	4.31495	5.49248	7.96332	6.35145	6.48322	0	0.413046	1.56379	0.61288	6.43371	6.75205	4.50046	4.6448	11.8099	4.53255	0	0	1.32633	1.53932
BnaA01g13540D	6.61678	2.86482	4.08168	3.05671	11.3061	10.839	16.0301	12.893	4.45047	6.43244	1.81805	2.85841	3.60414	2.86979	5.29594	3.27216	3.88566	12.1087	0.374196	0.86239	0.281046	0.832151
BnaA01g13550D	3.12756	2.77005	6.96403	4.66075	13.0706	12.797	14.1104	14.9004	3.03769	1.19532	0	0.61303	6.64044	11.4198	5.02234	1.88752	4.56258	5.26501	1.16344	2.06494	1.05073	2.28899
BnaA01g13560D	26.3683	18.6107	32.6098	21.68	81.663	88.1816	66.3729	56.4699	6.4927	5.55466	2.22026	5.07436	50.6627	72.2905	55.0286	43.572	28.2984	81.0708	1.38286	1.18419	1.27109	2.02213
BnaA01g13570D	0.950067	0.720706	1.32267	0.753597	0.981499	1.81091	0.398104	0.398396	0.204756	0	0	0.0697396	0.630723	0.568235	0.701088	0.421673	0.456451	1.043	0	0	0	0
BnaA01g13580D	1.86004	1.68746	1.32671	0.920169	3.06472	3.57866	1.82566	1.43719	0	0.215601	0.0861246	0.248287	3.67743	4.96617	5.19285	3.64146	0.303682	3.18198	0.0617388	0.0719855	0.787764	0.136585
BnaA01g13590D	0	0	0	0	0	0	0	0	0	0	0	0	0	0	0	0	0	0	0	0	0	0
BnaA01g13600D	0	0	0	0	0	0	0	0	0	0	0	0	0	0	0	0	0	0	0	0	0	0
BnaA01g13610D	18.4322	25.8751	28.7863	22.0645	80.6269	70.3024	46.2103	36.8384	8.74827	15.0216	6.87503	2.74457	36.4203	39.7377	31.1766	17.3628	26.0442	34.4331	0.365887	0.86296	1.63818	0
BnaA01g13620D	13.4493	23.5879	0.819725	1.17944	0.455337	0.450408	0.16509	0	4.43568	5.44216	8.65304	5.76374	0.316491	0.37668	1.09651	0.641591	2.50117	0.299792	1.99407	3.68771	4.50648	1.29578
BnaA01g13630D	1.63307	2.68498	7.31282	7.56402	5.7924	4.97695	9.31297	6.205	1.39578	1.53907	2.43113	1.08423	7.54641	7.29987	6.10449	1.81551	9.52691	10.0049	0.413034	0.477282	0.707641	0.22987
BnaA01g13640D	0	0	0	0	0	0	0	0	0	0	0	0	0	0.0457196	0	0	0.0424	0	0	0	0	0
BnaA01g13650D	11.8794	12.7002	18.7851	12.7863	39.7187	41.8308	24.7086	24.3929	9.09219	7.62956	0.665664	4.13423	22.5133	24.4602	29.1583	19.8576	14.7393	47.5794	1.5332	2.66803	3.28754	3.16765
BnaA01g13660D	0.207168	0	0	0	0	0	0.350988	0	0	0	0	0	0	0	0.48568	0	0	0	0	0	0	0
BnaA01g13670D	79.0925	80.9444	134.619	82.2213	283.399	298.166	160.373	125.953	13.934	15.349	9.74171	15.4393	319.101	214.027	168.775	109.764	104.889	198.009	2.01948	0.780868	0.57667	0.419341
BnaA01g13680D	0	0	0	0	0	0	0	0	0	0	0	0	0	0	0	0	0	0	0	0	0	0
BnaA01g13690D	21.376	29.9273	9.12028	7.05431	13.2186	12.4213	17.7352	22.566	8.81089	11.0552	4.65369	5.32202	15.3697	12.568	15.3965	4.53207	15.8498	8.69805	0	0	1.21414	5.08462
BnaA01g13700D	6.81859	11.111	5.91146	4.69321	3.90872	3.82666	0	0.19965	0	0	0	0	13.4136	1.38461	6.75316	1.7971	17.9665	1.50079	0	0	0	0
BnaA01g13710D	0.373807	1.5427	1.06149	0.7401	5.67816	4.43041	3.79905	1.3912	0	0	0	0	1.83848	1.15824	1.35402	0.303744	3.17843	1.04922	0	0	0	0
BnaA01g13720D	3.82021	2.42639	1.16774	1.05782	3.21259	3.67712	1.64263	0.565707	0.365226	0.180625	0	0.137405	1.82058	2.39143	2.38102	1.30658	3.52248	1.09124	2.4881	1.87557	0.474011	0.444321
BnaA01g13730D	0.391329	1.08436	0.0986176	0.11065	1.43906	0.825592	1.57048	1.6057	0.31913	0	0.453102	0.559325	0.522093	0.753577	1.30807	1.38804	2.66627	1.70947	0.260664	0.201958	0.202148	0.289409
BnaA01g13740D	1.00505	0.653867	0.438138	0.660073	0	0.6181	0.464956	0.3551	0	0	0	0	0	0	0	0.078158	0	0	0.456326	0.0758243	0	0.0705233
BnaA01g13750D	2.13014	4.06137	15.5837	9.47678	10.9506	7.90664	4.42837	6.14237	0	0	0	0	1.43759	11.5272	2.07752	3.3013	2.66549	1.38135	0.37824	0	0.446754	0
BnaA01g13760D	3.14245	2.13673	9.2221	6.89059	14.2969	13.7581	3.64219	3.19725	1.16067	0.557176	0.425508	1.09144	4.10709	16.4907	5.69864	9.5003	3.63541	4.09838	0.999111	1.16006	0.27642	0.432976
BnaA01g13770D	56.7937	71.1395	14.3617	16.7952	2.74673	0	0	0	0	0	0	0	18.1224	3.07347	3.32035	4.53984	10.3138	22.2751	0	0	0	0
BnaA01g13780D	19.7358	20.1704	32.7358	24.21	16.3844	18.3354	67.912	68.0558	0	0.187583	0	0	28.3126	23.0931	70.9551	34.4444	10.7463	99.9413	0	0	2.49387	1.36176
BnaA01g13790D	0	0	0	0	0	0	0	0	0	0	0	0	0	0	0	0	0	0	0	0	0	0
BnaA01g13800D	5.57326	3.85588	4.18992	3.36962	5.72434	4.75373	2.5642	2.39504	0	0	0	0	2.4896	3.30344	0.623048	3.4182	4.38245	2.04053	2.46901	2.19907	2.36597	2.02013
BnaA01g13810D	0	0	0	0	0	0	0	0	0	0	0	0	0	0	0	0	0	0	0	0	0	0
BnaA01g13820D	1.85437	0.581789	1.02198	0.856415	0.653634	1.95647	1.4764	0.252174	0	0	0	0	0.460531	1.12227	1.46244	0.791193	0	1.06944	0	0	0	0
BnaA01g13830D	12.7789	11.3596	18.2657	13.771	8.24007	8.08814	9.86519	8.66347	0.853486	0.990774	1.31484	0.577678	8.162	5.70617	8.99694	4.92151	6.3889	3.77024	0.253126	0.692933	0.100407	0.0929593
BnaA01g13840D	0	0	0	0	73.1612	107.694	27.4182	55.9948	0	0	0	0	0	0	0	0	0	0	2.67633	4.21897	2.01009	1.06089
BnaA01g13850D	17.0885	18.718	15.7129	12.0536	32.8005	24.8773	19.7706	11.0664	0.801803	1.17427	1.5237	2.38465	30.5795	29.9235	22.9383	9.50679	16.5361	14.8306	0.222853	0.129839	0	0.123317
BnaA01g13860D	17.3406	27.3969	5.9329	5.78287	8.13397	7.27818	5.4637	6.34287	0	0	0	0	12.6435	10.2179	30.2026	4.00504	5.58167	10.1385	0	0	0	0
BnaA01g13870D	7.56367	10.0212	5.57797	6.00479	0	0	1.16151	3.61428	0	0.564311	0	0	2.46306	0	2.38016	3.94577	0	3.15329	0	0	0	0
BnaA01g13880D	10.2351	11.3673	9.25722	7.59787	24.0821	16.6637	15.7059	9.99414	0	0	0	1.52814	23.0979	10.7327	15.6035	10.0968	15.1325	9.17106	0	0	0	0
BnaA01g13890D	3.09109	2.21805	2.92486	2.31704	3.28575	4.66557	4.3769	5.00236	0.133565	1.28523	0.365896	0.111114	4.13278	5.57808	4.52093	2.69476	3.70731	3.28835	0.400848	0.230187	0.22943	0.22103
BnaA01g13900D	2.02713	2.07046	0.743189	1.03765	5.58079	6.48166	3.68135	3.53124	0.0969549	0.0928273	0.137364	0.337136	2.91651	4.53383	3.06132	0.905337	1.56357	2.95357	0	0	0.120638	0.0573299
BnaA01g13910D	6.3297	6.43066	5.54415	4.32198	12.2978	10.2187	8.78316	5.59671	0.382696	0.277248	0.133856	0.199042	10.9279	9.66903	8.37547	8.85411	11.5336	8.71291	0	0	0.0605922	0.0577519
BnaA01g13920D	4.11629	3.58956	4.21404	3.34383	5.61212	7.08286	3.85406	4.32331	0.445485	0.349095	1.18682	0.832533	8.73026	14.3942	5.50017	1.29241	3.25521	15.4306	0.0478105	0	0.612667	0.627561
BnaA01g13930D	11.5541	13.5526	8.29777	8.71656	23.9626	23.0303	17.4588	12.7608	4.79014	2.24235	4.97418	4.96999	21.7644	17.5246	20.7403	14.2749	23.3526	23.0796	0.346805	0.303681	0	0.289377
BnaA01g13940D	2.7606	1.73139	3.38404	2.93241	7.01909	5.58858	7.00912	5.6474	0.616248	0.45951	0.679343	0.721171	6.54332	6.10157	8.07412	3.67152	7.25068	5.19785	0.0366056	0.0426745	0.042398	0.161699
BnaA01g13950D	1.76174	1.20024	0.687603	0.204934	0.398138	1.58681	0.560244	1.98817	0	0	0	0	0.99816	0.212369	1.00407	0.17872	0.18948	0.172313	0	0	0.156921	0.142495
BnaA01g13960D	0.796934	0.656807	0.594182	0.59021	1.20499	1.61412	0.793751	0.926818	0	0	0	0.127705	1.61148	1.1723	1.43695	0.554478	0.247634	1.43703	0.0332863	0	0	0
BnaA01g13970D	4.65817	9.42253	4.6882	4.64316	6.97353	11.9413	8.33526	12.0953	0	0	0	0	8.18998	9.64382	8.83224	1.88243	13.7349	8.32794	0	0	0	0
BnaA01g13980D	3.80563	1.56154	6.31967	3.09883	10.5066	12.599	12.5523	9.69408	7.86517	5.52592	1.75696	8.62751	3.29095	3.02936	5.23461	4.56859	5.63015	4.84224	4.64629	3.72981	1.24773	3.05263
BnaA01g13990D	6.8506	6.1156	21.351	11.0572	55.6704	40.2462	30.6462	24.7574	0.845963	1.28065	0.100534	0.378501	42.3479	26.724	16.398	11.0127	27.6114	37.0697	0	0	0	0
BnaA01g14000D	4.78275	4.397	3.16722	3.72478	7.87545	10.0925	7.81655	8.42998	0	0	0.178216	0.165299	6.65103	2.72178	7.15463	5.03966	3.02201	3.06463	0	0	0	0
BnaA01g14010D	0	0	0	0	0	0	0	0	0	0	0	0	0	0	0.779927	0	0	0	0.299369	0	0.681995	0
BnaA01g14020D	4.02178	4.84899	25.0523	12.7282	32.238	31.3414	29.6985	32.4003	0.437644	1.68566	0	0.450704	13.8639	11.2576	5.3146	6.16343	2.28352	3.17899	0.678829	1.32975	0	0
BnaA01g14030D	5.7766	2.86657	13.8696	11.7508	14.5079	15.3172	24.3178	21.7024	0.813811	0.315431	0	0	14.6915	11.9479	13.4728	6.01634	11.3307	11.3893	0.452034	0.729981	0	0
BnaA01g14040D	2.14854	1.32245	4.59182	2.90818	7.48229	7.25004	6.97664	6.07166	0.507865	0.493521	0.67891	1.34116	6.78917	5.04314	6.81327	3.76905	2.97639	6.5796	1.30518	0.88636	2.21395	2.5635
BnaA01g14050D	15.1193	15.7992	22.5371	19.0778	33.4811	31.2259	32.3831	27.3691	0.215313	0.104057	1.29961	1.64267	38.28	5.22295	39.5809	22.9449	27.6735	38.3094	0	0	1.71662	1.54732
BnaA01g14060D	8.56601	6.5891	10.3519	4.27741	20.1476	20.2982	11.8622	24.1635	0	0	1.23084	3.63404	12.6743	19.152	21.2538	13.7969	14.4608	10.5943	0	0	0	0
BnaA01g14070D	2.84695	0.201664	3.66629	1.94555	4.0916	6.08904	5.0767	4.72146	4.5741	2.26388	1.26055	8.31596	2.83302	3.29222	1.8634	1.8123	1.45708	3.95705	2.36266	2.12762	0.502693	0.778695
BnaA01g14080D	4.35872	5.16018	1.3257	1.223	0	0	0	0	0	0	0	0	0	0	0	0	0.666843	0	0	0	0	0
BnaA01g14090D	5.35238	5.67007	7.87381	4.2892	13.1269	10.3387	10.4426	7.84848	0	0	0	0	10.7673	10.9675	9.03877	7.65898	12.2985	12.7074	0	0	0	0
BnaA01g14100D	29.4161	22.2173	27.0731	18.5167	60.138	67.5162	64.3837	56.98	8.94243	9.05898	8.39795	8.83519	52.6962	59.5476	62.276	30.0997	44.5866	58.1703	1.78139	1.60464	0.800395	0.700957
BnaA01g14110D	11.3678	16.6393	14.6288	12.2112	9.98522	14.4359	11.7573	9.02419	1.8667	4.05977	2.10152	4.65802	6.17972	7.0348	6.29005	3.00063	5.53063	3.27314	0	0	0	0
BnaA01g14120D	196.691	226.174	270.211	187.5	526.075	592.831	399.962	413.063	3.96604	7.45071	3.37671	8.03402	366.03	369.34	565.776	346.156	184.433	525.594	0	0	0	0
BnaA01g14130D	5.17982	8.50332	8.66965	6.20901	5.52932	3.10735	3.00874	2.74506	0.715009	0.700119	0.160884	0.29494	4.92784	5.78879	2.68387	2.66415	5.15912	3.70567	0.0994687	0.231961	0.230717	0
BnaA01g14140D	0.21271	0.266003	0.422051	0.0594289	0	0.110111	1.13242	0.984231	0	0	0	0	0.293274	0.207341	0	0	0	0.221504	0	0	0	0
BnaA01g14150D	6.09237	4.3476	8.67002	6.96506	3.35329	2.37308	18.6261	12.9481	3.15596	3.03152	0	0.455842	5.85689	15.911	19.3301	19.0763	1.32915	1.87232	5.82557	6.31941	5.09664	5.04704
BnaA01g14160D	13.409	8.65753	14.5549	9.16056	14.2057	23.9325	24.2606	34.0811	5.64333	5.186	1.41763	6.05611	29.4029	41.8596	44.2416	34.1222	15.6598	32.275	8.00052	10.6492	5.55102	9.63136
BnaA01g14170D	5.3516	8.4962	4.77972	3.74215	8.71155	8.76419	3.61465	2.75601	0	0.823974	0	0	3.79361	2.6825	2.8838	3.30501	5.25601	3.2022	0	0	0	0
BnaA01g14180D	21.3409	20.3126	23.503	15.3187	39.4716	39.8882	43.0882	37.2649	2.40005	2.31232	3.05723	4.21947	45.0419	47.2098	43.8525	28.4073	34.6477	47.7521	5.37023	4.30714	4.1609	2.6105
BnaA01g14190D	22.7185	12.7184	12.6063	10.9384	22.9179	33.1569	26.5567	22.8328	4.3261	3.73281	0.508357	4.17496	29.8766	37.8114	36.6123	23.6926	12.3901	32.0592	0	0	0	0
BnaA01g14200D	4.29665	3.44526	3.73424	2.75839	2.46369	4.3423	6.90421	5.7846	1.897	2.39733	0.895322	0.713162	7.78107	7.10781	5.05464	2.18322	3.93382	6.79238	0	0	0	0
BnaA01g14210D	0	0	0	0	0	0	0	0	0	0	0	0	0	0	0	0	0	0	0	0	0	0
BnaA01g14220D	0	0	0	0	7.24652	0	1.60838	1.58963	0	0	0	0	0	0	0	0	0	0	0	0	0	0
BnaA01g14230D	0	0	0	0	0	0	0	0	0	0	0	0	0	0	0	0	0	0	0	0	0	0
BnaA01g14240D	1.37885	1.84518	7.9037	3.69585	13.915	12.6733	18.3354	15.7838	0.985926	0.746302	0.90685	0.672713	24.4877	16.6848	7.80638	4.66544	8.69214	9.39951	0.414333	0.412391	0.481124	0.19462
BnaA01g14250D	2.23843	3.21209	2.20081	1.70932	3.31732	5.5398	3.13419	3.04065	0.376358	0.184992	1.64669	0.403419	5.60574	5.6974	5.83972	5.14107	6.27322	8.14599	0.923213	0.841918	0.598034	0.796174
BnaA01g14260D	0.295844	0	0.340693	0	0	0.726968	0	0.513237	0	0.248168	0.196863	0.189776	0.493704	0.969138	0.70656	0	0.346771	1.34872	0	0.168574	0.164515	0
BnaA01g14270D	118.371	111.967	55.7464	79.6249	133.532	234.167	123.068	119.301	3.6453	0	3.27583	3.27352	184.888	68.0778	112.43	79.7528	19.8641	137.349	2.1506	0	0	8.04353
BnaA01g14280D	0	0	0	0	0	0	0	0	0	0	0	0	0	0	0	0	0	0	0	0	0	0
BnaA01g14290D	28.207	41.6761	61.8521	51.0537	188.203	178.545	103.057	114.6	23.4807	25.2515	14.4747	21.123	67.3451	90.8113	83.8066	20.2472	67.3956	107.338	2.79565	4.81584	8.77441	11.906
BnaA01g14300D	9.25327	5.76659	5.12225	5.38853	15.8503	13.0005	11.5141	14.3615	1.33067	0.43058	2.52555	1.35055	11.9525	17.1547	14.1251	6.88655	8.8531	10.7659	0	0	0	0
BnaA01g14310D	19.6865	7.65141	17.0333	13.1762	37.6132	53.7631	37.9007	43.7484	5.70773	4.9928	2.34036	15.1382	20.07	27.2932	26.9427	19.7432	9.3658	33.386	6.10499	8.88037	0	0.1825
BnaA01g14320D	3.17173	0.940203	3.08937	5.8075	29.0626	20.5112	41.0343	27.8716	0	0	0	0	43.9765	57.1	44.8181	17.0357	57.661	35.8853	0	0	0	0
BnaA01g14330D	5.54383	4.47117	6.8611	4.9122	10.8119	12.3378	10.2497	11.8922	1.7678	2.10985	1.91693	4.24173	8.98182	10.4085	6.90362	5.22959	4.35787	8.7772	1.33178	1.55065	1.60356	1.22614
BnaA01g14340D	4.98671	6.28788	7.44439	8.88245	15.7423	16.1193	24.0468	21.9049	0	0.48438	0.489172	0.461239	19.7916	13.5899	15.3083	6.23316	34.8889	22.2043	1.06102	0.930315	1.21174	0.895118
BnaA01g14350D	5.63026	4.22415	4.8561	5.32193	14.7724	10.1983	1.08095	2.90823	5.0669	4.90376	15.5436	5.61416	9.12459	5.97975	10.4316	3.49868	15.0235	5.51987	2.74482	1.80263	1.57967	1.55066
BnaA01g14360D	0	0	0	0	0	0	0.384017	0	0	0	0	0	0	0	0.284861	0	0	0	0	0	0	0
BnaA01g14370D	1.84592	2.57697	3.26684	0	16.2843	6.20615	0	8.95388	0	0	0	0	1.65506	7.74325	7.76816	12.0495	0	3.6289	0	0	0	0
BnaA01g14380D	5.79315	3.90107	3.99447	3.13683	5.83106	5.10827	5.4991	3.00848	0.487914	0.471817	0	0.20272	42.0888	6.03728	4.98244	4.31269	4.56973	10.6536	0.373889	0	0.145641	0
BnaA01g14390D	0	0	0	0	0	0	0	0	0	0	0	0	0	0	0	0	0	0	0	0	0	0
BnaA01g14400D	338.388	276.441	389.837	297.325	585.521	736.967	585.017	744.222	7.07272	8.10833	0	4.96679	578.318	692.107	1015.93	570.89	326.573	871.689	0	0	0.46712	0.466402
BnaA01g14410D	0.215049	0.0513999	0.0522613	0	0.108949	0.319159	0.175646	0	0.0890219	0	0.217929	0.0688865	0.0596944	0.0695548	0.0660356	0	0.0643828	0	0	0	0	0
BnaA01g14420D	114.475	120.741	80.1309	67.1806	146.575	149.09	195.296	204.731	52.9516	53.958	25.3699	46.5312	139.172	137.832	163.443	70.8901	77.4064	61.9419	1.24643	2.63619	9.95682	7.11592
BnaA01g14430D	6.42243	4.15157	6.84654	5.82064	15.1479	13.9777	20.0189	14.9071	16.1165	12.4712	18.0226	16.487	7.09186	5.91107	7.79011	4.33153	7.50035	11.5339	6.34886	9.56553	7.20825	9.6459
BnaA01g14440D	0	0	0	0	0.40928	0	0	0	0	0	0.237671	0	0	0	0	0	0	0	0	0	0	0
BnaA01g14450D	3.0255	23.3545	3.50731	85.9085	1.31606	3.75039	9.64911	8.1402	4.13196	8.2445	204.534	0.341753	1.04697	0.971771	1.75001	0.788741	24.7161	10.207	0.223207	4.4453	8.27754	3.78993
BnaA01g14460D	2.99272	1.09673	0	0.142649	0	0.813305	0.390848	1.00423	0	0	0.192067	0	0.366745	0.891392	2.23699	1.62282	1.73977	0.835933	0	0	0.360555	0.11357
BnaA01g14470D	67.5109	74.2392	84.1735	94.2289	151.216	132.44	147.409	131.975	44.5681	40.1941	27.9348	31.5696	113.09	159.551	143.145	94.1246	166.19	173.224	11.435	11.416	31.5416	26.8722
BnaA01g14480D	0	0	0	0	0	0	0	0	0	0	0	0	0	0	0	0	0	0	0	0	0	0
BnaA01g14490D	1.5637	2.05924	1.48763	2.6389	3.42675	2.04733	3.01848	2.41279	0	0	0	0	2.64435	1.19382	2.49911	0.59945	1.91107	1.49998	0	0	0.175984	0
BnaA01g14500D	0	0	0	0	0	0	0	0	0	0.0722707	0	0	0.0496173	0	0	0	0	0	0	0	0	0
BnaA01g14510D	0	0.51793	0	0.149031	0.563878	0.278153	0.429071	0	0	0	0	0	1.25931	3.79952	1.1392	0.867712	3.63101	1.25326	0	0	0	0
BnaA01g14520D	30.4072	10.6444	18.5542	9.94895	27.6249	21.4643	18.4135	23.1583	6.33597	4.13434	0	2.59224	28.5901	23.3358	29.8372	20.8429	11.9608	19.0352	0	0	0	0
BnaA01g14530D	5.04333	4.23003	3.10778	3.9139	5.24489	6.15523	4.73996	4.23324	0.514497	0	0.40008	0.577456	8.04682	8.87221	5.42442	4.4806	6.32604	7.28792	0	0	0	0
BnaA01g14540D	0	0	0	0	0	0	0	0	0	0	0	0	0	0	0	0	0	0	0	0	0	0
BnaA01g14550D	0	0	0	0	0	0	0	0	0	0	0	0	0	0	0	0	0	0	0	0	0	0
BnaA01g14560D	0	0	1.15818	0	0	0	3.71282	1.24997	0	0	0	0	0.505294	0.335556	0	0.2653	0	0.262465	0	0	0	0
BnaA01g14570D	20.6309	18.95	18.6262	11.7966	24.9782	22.7929	14.4189	19.8947	0.196768	0.580742	0.821663	0	31.985	36.4305	25.7516	19.2142	27.3813	21.1022	4.24698	4.85594	1.85303	2.02445
BnaA01g14580D	0	0	0	0	0	0	0	0	0	0	0	0	0	0	0	0	0	0.115271	0	0	0	0
BnaA01g14590D	1.96841	2.31222	1.52921	0.535208	1.22802	0.625612	1.25822	2.07106	0.481463	0.460451	0.499466	0.603348	4.04446	3.52795	3.52957	3.08411	4.0479	3.45771	0.715528	0.458527	0.270645	0.361658
BnaA01g14600D	5.78502	0.94659	3.85132	2.06731	6.23019	6.60555	6.69685	4.45228	0	0	0	0	7.5136	9.72918	7.34483	4.75751	1.21757	6.42132	1.07397	0.622222	0.231224	0.370087
BnaA01g14610D	0	0	0	0	0	0	0	0	0	0	0	0	0	0	0	0	0	0	0	0	0	0
BnaA01g14620D	0	0	0	0	0	0	0	0	0	0	0	0	0	0	0	0	0	0	0	0	0	0
BnaA01g14630D	0	0	0	0	0	0	0	0	0	0	0	0	0	0	0	0	0	0	0	0	0	0
BnaA01g14640D	5.37616	5.96386	1.89503	4.62469	3.24209	1.18167	1.5591	2.71982	0	0.373061	0	0.31323	1.72452	2.40973	1.41472	0.249064	1.36748	2.13367	0	0	0	0
BnaA01g14650D	1.92865	1.78074	1.86204	2.23046	4.61882	4.0669	3.64363	3.00081	0.585013	0.705494	0.607821	1.00783	1.60899	3.17206	3.39456	1.65069	3.00627	3.19017	0.302384	0.265296	0.622786	0.498502
BnaA01g14660D	2.67698	1.54094	2.30684	0.448301	2.14259	3.32153	2.0292	3.5049	0	0.28171	0.430851	0.626395	1.71323	2.1175	1.58569	1.71921	3.20753	1.84271	0.311778	0	0.180386	0
BnaA01g14670D	0	0	0	0	0	0	0	0	0	0	0	0.619537	0	0	0	0	0	0	0.418938	0	0	0
BnaA01g14680D	0	0	0	0	0	0	1.55641	0.788347	0	0	0.29833	0	0	0.311155	0	0	0	0.245939	0	0	0.248806	0
BnaA01g14690D	0.141938	0	0.305723	0.170748	0	0	0	0	0	0	0	0	0	0	0	0	0.163803	0.14243	0	0	0	0
BnaA01g14700D	4.01415	1.42625	2.38526	1.79423	1.98494	3.38457	0.940298	3.77723	0	0	0	0	3.49064	3.8515	3.26077	4.07952	1.93886	5.67172	0	0	0	0
BnaA01g14710D	6.66284	3.58124	4.30163	3.3542	5.50205	2.74136	5.24321	4.26965	1.64048	1.62713	2.99946	3.44926	10.0162	7.63391	12.7459	7.55115	5.58478	12.5178	0	0	0.124594	0.473556
BnaA01g14720D	16.2509	7.3034	14.4326	11.138	24.6954	38.7437	13.9694	15.0064	1.1193	1.02094	0.620156	3.03937	16.5887	28.2645	35.6494	27.8993	4.66141	33.7991	0.475398	0.834922	2.11593	2.4072
BnaA01g14730D	3.71278	2.26921	3.29598	2.04022	4.6904	4.85001	3.0765	3.26373	0.789907	0.757311	0.111052	0.305525	6.20761	4.24423	3.80906	1.72819	4.51004	3.75025	0	0	0.1638	0
BnaA01g14740D	1.83402	1.10114	1.09601	1.089	3.52723	3.77326	2.7482	1.60296	0.997501	0	0.839002	0.158465	3.10145	4.46537	2.01753	1.81578	5.01726	0.625063	0.104167	0.483786	0.357345	0.45757
BnaA01g14750D	43.4773	38.3249	41.8411	32.5259	72.2009	80.8056	41.9196	40.9485	2.07846	2.38149	0.576123	1.8745	104.253	85.1914	149.106	86.9469	59.5057	92.0932	0.199796	0	1.4135	0.972209
BnaA01g14760D	0	0	0	0.12569	0	0	0	0	0	0	0	0.140994	0	0	0	0	0	0.109468	0	0	0	0
BnaA01g14770D	0	0	0.190028	0.137142	0	0	0	0	0	0	0	0	0	0	0	0	0	0	0	0	0	0
BnaA01g14780D	0	0	0	0	0	0	0	0	0	0	0	0	0	0	0	0	0	0	0	0	0	0
BnaA01g14790D	8.02821	4.16882	9.63556	5.59184	14.884	11.3966	16.6955	17.871	1.27782	4.32948	2.10135	2.77135	14.3251	17.6398	13.5994	10.8769	9.79482	16.4954	0	0	4.59809	6.21279
BnaA01g14800D	0	0	0	0	0	0	0	0	0	0	0	0	0	0	0	0	0	0	0	0	0	0
BnaA01g14810D	0	0	0	0	0	0	0	0	0	0	0	0	0	0	0	0	0	0	0	0	0	0
BnaA01g14820D	0	0	0	0	0	0	0	0	0	0	0	0	0	0	0	0	0	0	0	0	0	0
BnaA01g14830D	0	0	0	0	0	0	0	0	0	0	0	0	0	0	0	0	0	0	0	0	0	0
BnaA01g14840D	1.69468	1.48798	2.41241	1.46172	4.4678	2.9997	3.329	2.13428	0.445321	0.524042	0.33594	0.386879	2.36131	2.3352	2.57852	1.54468	2.13897	3.39955	0.102129	0.238393	0.0602635	0.110122
BnaA01g14850D	7.5164	9.99722	6.2583	4.57982	4.69472	9.16419	6.99698	2.68123	0	0	0	0	9.74729	15.2242	13.0421	7.30943	6.52845	2.13381	0.239782	0.278308	0.420291	0.408249
BnaA01g14860D	82.3352	26.9647	65.4099	41.3046	75.7654	115.463	83.2176	105.238	5.34147	4.69735	3.224	25.3492	87.993	125.38	139.481	95.5333	29.057	71.6843	0	0.315566	0.782496	1.20092
BnaA01g14870D	15.2222	13.7484	10.9935	9.50055	33.0143	30.1643	59.6319	38.7274	6.03271	5.82583	5.5448	10.8583	49.8591	27.3633	56.5137	31.417	54.2845	52.7152	3.81292	1.46832	5.37232	5.08748
BnaA01g14880D	11.4991	11.4107	22.2277	27.841	16.6368	12.4396	33.7085	25.834	1.54898	3.37226	3.59646	2.17595	52.7942	44.067	58.3745	31.0111	57.719	25.0125	2.16572	1.89498	3.41498	2.88441
BnaA01g14890D	0.58871	0.212897	0.443474	0	1.4403	0.457955	1.32532	1.69876	0	0	0	0	0.216281	0.8127	0	0	2.19463	0.42774	0	0	0	0
BnaA01g14900D	11.3614	20.3681	10.7398	7.56823	27.3305	22.4374	17.4296	21.5287	0	0	0	0	18.5235	19.3795	17.3277	6.12914	27.0568	15.2053	0	0	0	0
BnaA01g14910D	7.6496	5.3505	3.5309	4.05922	9.42441	11.092	5.03804	6.97819	0	0	0.299941	0.285307	7.94128	33.6385	9.24044	7.75262	10.6759	17.3351	0	0	0.898075	0.656662
BnaA01g14920D	6.91694	11.316	2.26822	1.85975	16.1194	11.0975	4.9765	5.39914	0	0	1.37197	0.564056	7.31523	4.96421	5.29006	1.22924	9.58291	3.89429	0.446658	0.795721	1.2766	0.747959
BnaA01g14930D	5.64456	0	0	0	0	0	0	9.47974	0	0	0	0	9.69893	0	0	4.8599	11.4539	0	0	0	0	0
BnaA01g14940D	6.77991	4.30662	15.0055	12.7603	5.08759	6.76422	13.4184	11.7961	0.921934	0.897993	2.88023	0.775642	7.53621	20.447	4.45528	2.07171	6.77562	25.1159	0	0	0	0
BnaA01g14950D	5.37086	6.95496	1.52216	1.73112	6.16306	6.86416	1.24137	0.755264	0.250091	0.242742	2.58993	0.171705	2.43319	4.06246	3.96852	0.825765	2.11273	4.18194	0	0.155424	2.60723	2.20177
BnaA01g14960D	137.055	64.6887	113.592	75.5364	156.16	177.623	241.178	370.166	0.469249	0.450049	0	0.384134	276.81	221.355	296.949	160.304	78.9707	299.987	0	0	0	0
BnaA01g14970D	0	0	0	0	0	0	0.186363	0	0	0	0	0	0	0	0.133801	0	0	0.11186	0	0	0	0
BnaA01g14980D	0	0	0	0	0	0	0	0	0	0	0	0	0	0	0	0	0	0	0	0	0	0
BnaA01g14990D	5.37618	4.1024	2.52922	2.57562	2.09907	2.25129	3.34217	2.05305	0	0	0	0	4.46197	2.2601	4.44694	2.10127	5.5678	7.73873	0.058176	0	0	0
BnaA01g15000D	0.333525	0	0	0	0	0	0	0	0	0	0	0	0	0.213027	0	0.529918	0.191853	0	0	0	0	0
BnaA01g15010D	25.4737	23.5946	29.8171	23.8312	8.27497	8.80583	17.7787	20.2317	0	0	0	0	22.1438	20.5306	36.6158	14.3729	19.2764	18.8187	0	0	0	0
BnaA01g15020D	0	0.0894357	0.263373	0.103701	1.57813	0.790494	0.149746	0.153066	0	0	0	0	0.0929681	0.907558	0.571149	0.0963794	0.518758	0.554378	0.0724528	0	0	0
BnaA01g15030D	0	0	0	0	0	0	0	0	0	0	0	0	0	0	0	0	0	0.0728373	0	0	0	0
BnaA01g15040D	1.12485	0.808697	2.12755	1.04989	2.2281	1.7435	0.464335	0.792991	0	0	0	0	1.64761	0	5.84889	1.23386	4.5426	0.290032	0	0	0	0
BnaA01g15050D	0.424824	0	0	0.261704	1.56213	3.51413	1.72097	1.38669	0	0	0	0	4.03008	5.3293	3.76614	1.15376	1.26005	1.75316	0	0	0	0
BnaA01g15060D	3.23478	2.48748	4.65001	3.08128	4.11269	5.67143	7.40231	7.07978	0.172024	0.497455	0.0692174	0.526837	8.59346	2.31954	8.38805	3.48727	9.923	4.08269	0	0	0	0
BnaA01g15070D	4.8784	2.55491	3.78411	2.307	8.39782	6.12396	6.48298	7.92516	0.146971	0.351559	0.280456	0.163639	7.91061	3.37349	7.5777	3.75774	8.53611	4.86285	0.149826	0.217079	0.0428864	0.127133
BnaA01g15080D	31.8047	28.6482	4.91888	5.80695	25.0301	25.8123	17.2823	11.5188	1.21609	2.16469	0.17373	1.38439	21.7414	28.539	46.2855	22.2691	27.5188	31.6485	0	0.154584	0	0.298828
BnaA01g15090D	0.125915	0	0	0	0	0	0	0	0	0	0	0	0	0	0	0	0	0	0.124604	0	0	0
BnaA01g15100D	15.5615	18.191	18.1579	15.0372	14.461	13.6874	19.9729	21.8517	0	0	0	0	31.6554	18.9313	29.1134	18.6095	28.3947	32.4545	0	0	0	0.191568
BnaA01g15110D	1.26774	0.623757	0	0	0	0.124463	0.196052	0	0	0	0	0.0695722	0	0.0788437	1.56484	0.261163	1.64086	0.423537	0	0	0.137589	0.0645528
BnaA01g15120D	0	0	0	0	0	0	0	0	0	0	0	0	0	0	0	0	0	0	0	0	0	0
BnaA01g15130D	8.35087	8.62296	13.0053	12.227	5.8449	4.1097	5.00488	4.39021	0.366838	0.456321	0.23375	0.379383	9.47456	9.88413	14.0547	9.64689	11.3622	8.11123	0.0270793	0.0630678	0.158965	0.0890896
BnaA01g15140D	8.73658	12.0352	7.02233	6.65823	14.5852	13.8891	11.8872	12.1447	3.05664	4.22427	8.05473	6.28727	9.6962	10.9676	15.1452	8.45452	20.3706	10.6696	6.234	0	8.68791	11.2724
BnaA01g15150D	0	0	0	0	0	0	0	0	0	0	0	0	0	0	0	0	0.177625	0	0	0	0	0
BnaA01g15160D	4.27319	2.72352	3.05288	1.32255	11.6397	17.4412	4.65598	10.1005	0	0.18561	0	0	9.74998	17.8033	12.0883	5.98147	4.69427	9.81273	0	0	0	0
BnaA01g15170D	0	0	0	0	0	0	0	0	0	0	0	0	0	0	0	0	0	0	0	0	0	0
BnaA01g15180D	0.189189	0.263927	0.336599	0.25279	0.387429	0.468493	0.613134	0.690898	0.378582	0.121291	0.532084	0.482086	0.335801	0.0977035	0.419625	0.341841	1.34333	0.116764	0.0697376	0.0812963	0.282638	0.266948
BnaA01g15190D	0	0	0	0	0	0	0	0	0	0	0	0	0	0	0	0	0	0	0	0	0	0
BnaA01g15200D	0	0	1.10342	1.19289	2.58331	0	1.19609	1.18445	0	0	0	0	0.727518	1.00922	0.812844	0.728029	1.62522	0	0	0	0	0
BnaA01g15210D	0.476406	0.59777	1.34727	0.740097	3.10218	0	2.41964	2.47953	0	0	0	0	0.523055	2.68511	2.26771	0.539104	1.14329	1.02428	0	0	0	0
BnaA01g15220D	1.65856	0.931356	1.10403	1.08285	4.38972	3.03896	2.40809	3.22753	0	0	0	0	4.41479	1.90418	3.06012	0.494908	3.63716	1.64606	0	0	0	0
BnaA01g15230D	0	0	0	0	0	0	0	0	0	0	0	0	0	0	0	0	0	0	0	0	0	0
BnaA01g15240D	0	0	0	0	0	0.581715	0	0.217441	0	0	0	0	0.133559	0	1.07832	0.136389	0.296169	0.388934	0	0	0	0
BnaA01g15250D	10.87	23.0315	10.7887	10.2987	14.2869	12.0639	9.22584	9.4804	0.638549	1.09155	0.309139	0.412766	13.09	8.30114	14.2134	5.87046	30.0404	11.2954	0.322642	0.281418	0.469306	0.860214
BnaA01g15260D	0	0	0	3.45566	0	0	0	0	0	0	0	0	0	0	0	0	0	1.64147	0	0	0	0
BnaA01g15270D	0.258809	0.162421	0.0815704	0.0916609	0.0834307	0	0.0682262	0.0688554	0	0	0	0	0.372362	0.713459	0.422648	0.187097	0.459596	0.399319	0.039542	0.0914234	0.135674	0.0845082
BnaA01g15280D	2.83469	1.30901	3.14565	1.68464	0	0	0	0	0	0	1.2564	1.30924	8.69645	4.11832	4.27595	4.77239	7.66751	2.94748	0	0	0	0
BnaA01g15290D	6.499	3.66782	2.9456	1.88729	5.9688	6.71368	4.63252	5.80964	0.107401	0.313285	0	0.177694	6.92128	6.75877	9.04796	4.43055	8.48345	6.58895	0.115368	0.337587	0.271492	0.125357
BnaA01g15300D	38.1299	27.6674	44.7269	33.628	64.2781	77.1625	50.076	53.0818	1.40901	0.954272	0.968323	2.42629	61.0004	50.495	78.5253	36.9258	23.9679	43.7431	0	0.105581	0.104563	0.0974006
BnaA01g15310D	0.13961	0.423602	0.499003	0.244954	0.471881	1.24723	0.912936	1.1701	0	0	0	0	1.41091	0.711593	0.504191	0.295775	0.489279	1.2881	0	0.0701352	0	0
BnaA01g15320D	20.3129	17.0822	34.1884	34.7211	70.5353	67.2623	39.5373	37.0707	5.74601	5.00297	2.59284	2.23352	81.36	54.8214	65.8078	45.6165	36.3845	1.12847	2.35747	3.90784	2.28937	3.21894
BnaA01g15330D	0.965746	0.350114	0.770957	0.588219	0.246066	0.369227	0	0.285762	0	0	0	0	2.57693	1.2454	2.08904	1.74733	2.18951	3.88643	0	0.0623763	0.122553	0
BnaA01g15340D	0	0	0	0	0	0	0	0	0	0	0	0	0	0	0	0	0	0	0	0	0	0
BnaA01g15350D	0.800791	0.790784	1.40109	1.30638	4.66627	1.65292	3.38072	3.11775	0.334559	0	0	0	4.82519	3.35599	3.4273	0.450479	4.92091	2.58378	0	0.118035	0.116722	0
BnaA01g15360D	2.09648	0.865683	1.4317	1.67869	4.14199	3.76284	2.59548	1.30746	0	0	0	0	1.63706	1.61921	2.44311	1.08287	1.16324	2.75189	0	0	0	0
BnaA01g15370D	0	0	0	0	0	0	0	0	0	0	0	0	0	0	0	0	0	0	0	0	0	0
BnaA01g15380D	0	0	0	0	0	0	0	0	0	0	0	0	0	0	0	0	0	0	0	0	0	0
BnaA01g15390D	87.4963	111.435	113.238	78.9392	445.367	434.489	171.245	211.987	23.8441	33.4136	4.95787	53.9665	84.5114	191.659	142.413	103.924	89.872	182.242	0	0	0	0
BnaA01g15400D	0	0	0	0	0	0	0	0	0	0	0	0	0.270245	3.14536	0	0	0	0	0	0	0	0
BnaA01g15410D	2.6143	2.79425	2.72528	1.35935	6.48572	9.47605	6.71325	6.89183	0.179289	0.347039	0	0.263328	4.97125	9.23388	7.05204	5.11473	9.52724	9.7984	0	0	0	0
BnaA01g15420D	0	0	0	0	0	0	0	0	0	0	0	0	0	0	0	0	0	0	0	0.0890589	0	0
BnaA01g15430D	0	0	0	0	0	0	0	0	0	0	0	0	0	0	0	0	0	0	0	0	0	0
BnaA01g15440D	1.21852	2.82675	0	1.12908	0	0	0.663824	0.675099	0.639091	0	2.85761	0.495425	0	1.64111	1.84423	1.17171	3.21294	0	0	0	0	0
BnaA01g15450D	26.4584	15.1807	22.6812	18.9606	36.8546	42.5598	41.6632	37.2438	10.1993	9.19405	4.23784	11.5795	30.1349	34.7299	46.9919	33.9811	27.445	34.5386	0.429895	0	1.16921	0.414705
BnaA01g15460D	0	0	0	0	0	0	0	0	0	0	0	0	0	0	0	0	0	0	0	0	0	0
BnaA01g15470D	0	0	0	0	0	0	0	0	0	0	0	0	0	0	0	0	0	0	0	0	0	0
BnaA01g15480D	0.649519	0.134576	1.33276	0.150742	0.298597	0.586274	1.27803	0.658944	0	0	0	0.159571	0.53547	2.64184	0.470223	0	1.05716	0.264233	0	0	0	0
BnaA01g15490D	28.5627	18.1298	23.7023	24.6987	33.7626	37.2544	37.4309	43.092	0	0	0	0	48.2353	46.394	77.3594	49.3208	46.2397	61.0349	0	0	0	0
BnaA01g15500D	2.48938	1.85975	1.65424	0.987883	0.791182	1.58463	0.800952	1.83916	0	0.409048	0	0.320027	1.84066	3.59206	1.80006	1.7223	1.17506	3.35494	0.115075	0	0	0
BnaA01g15510D	12.277	22.8218	16.4945	11.6967	18.0174	18.3954	16.3145	12.2132	0.638835	0.307955	0.263783	0	17.1234	12.5473	15.4109	12.2599	11.3	14.8804	0	0	0	0
BnaA01g15520D	0	0	0	0	0	0	0	0	0	0	0	0	0	0	0	0	0	0	0	0	0	0
BnaA01g15530D	0	0	0	0	0	0	0	0	0	0	0	0	0	0	0	0	0	0	0	0	0	0
BnaA01g15540D	0	0	0	0	0	0	0	0	0	0	0	0	0	0	0	0	0	0	0	0	0	0
BnaA01g15550D	0	0.303468	0	0	1.48375	1.39511	0	0	0.482018	0	0	0	0	0	0.338527	0	0.331907	0	0	0	0	0.298367
BnaA01g15560D	6.60102	3.83695	4.76979	4.43234	15.4481	17.2931	18.9699	16.506	0.796552	0.780193	2.43317	1.24645	23.465	22.1245	23.2741	16.056	15.638	21.6262	0.854178	1.1697	0	0
BnaA01g15570D	0	0	0	0	0	0	0	0	0	0	0	0	0	0	0	0	0	0	0	0	0	0
BnaA01g15580D	0	0	0	0	0	0	0	0	0	0	0	0	0	0	0	0	0	0	0	0	0	0
BnaA01g15590D	2.68596	1.64216	5.42492	5.80929	5.77369	6.38529	6.79427	6.04461	0.372331	0.266999	0.502578	0.343499	7.09558	11.0281	12.9977	8.80457	7.9616	9.06055	0.446113	0.460722	0.173613	0.376367
BnaA01g15600D	2.33725	4.15198	2.32853	1.60033	3.36422	5.85475	4.41612	4.30909	0	0.108837	0.938759	0.46398	3.45884	5.31245	3.6267	2.366	3.77438	4.75119	0.433184	0.217453	0	0
BnaA01g15610D	1.62299	1.89246	1.91227	0.484759	2.43555	1.85553	1.34928	0.692162	0	0	0	0	0.844953	2.36811	0.728976	1.27031	0.709906	2.50204	0	0	0	0.195903
BnaA01g15620D	3.56357	7.92847	26.9494	23.1151	76.4119	63.3087	26.8243	25.7527	0	0.619533	0	0	34.1625	33.1641	43.9622	19.2218	44.9526	45.0185	0	0	0	0.114114
BnaA01g15630D	6.77766	5.83637	5.6927	4.07337	20.2581	22.8735	19.4928	17.0099	4.43742	4.81527	20.7244	8.22191	11.7	13.0874	17.5962	13.0714	17.923	15.2459	1.1976	1.39947	0.0991179	0
BnaA01g15640D	97.4821	146.684	65.7734	85.6844	167.236	158.92	180.899	213.26	21.9358	23.6609	1.23914	0.423103	209.91	296.567	768.692	413.341	479.563	148.823	0	0	0	0.128084
BnaA01g15650D	4.94325	6.20723	3.72025	3.05838	5.00542	5.81232	3.31137	5.07823	0	0.0838822	0.276714	0	3.61141	2.89811	7.6511	4.21345	4.56897	4.96031	0.086159	0.0510208	0	0
BnaA01g15660D	1.28719	3.03068	1.579	1.8813	6.09774	5.4537	2.04589	6.13926	0	0	0	0	4.09615	1.63494	2.81256	0.58553	1.35001	0.59863	0	0	0	0
BnaA01g15670D	4.21619	4.92127	3.16769	2.8822	0	0	0	0	0	0	0.967051	0	2.13066	3.05619	3.2453	0.973202	4.48628	2.45488	0	0.287872	0	0
BnaA01g15680D	0	0	0	0	0	0	0	0	0	0	0	0	0	0	0	0	0	0	0	0	0	0
BnaA01g15690D	16.3227	20.7004	28.496	18.4154	43.1996	42.1974	36.4817	46.794	12.3445	13.4043	24.035	25.5117	43.9826	35.0625	43.3699	20.405	63.7023	36.5581	0	0	0	0
BnaA01g15700D	0.15913	0.486167	0.490065	0.37436	0	0.708829	0.518375	0	0	0	0	0	1.16328	1.40029	1.91338	0.331937	1.49438	2.10307	0.268148	0	0.153784	0
BnaA01g15710D	0	0	0	0	0	0	0	0	0	0	0	0	0	0	0	0	0	0	0	0	0	0
BnaA01g15720D	2.56633	1.25547	3.18997	1.71923	5.78702	8.32875	4.69341	5.48796	1.43555	2.13051	0.235454	2.31409	4.09513	8.64792	6.18524	4.88658	2.18166	7.30709	1.77203	1.29617	1.63483	1.58867
BnaA01g15730D	3.71397	2.34606	1.51952	0.951532	1.07124	2.83447	2.45405	3.04133	0.960481	0.671407	0.966487	1.6653	5.01834	7.95105	6.0819	3.95007	3.94579	4.82751	0	0	0	0
BnaA01g15740D	2.03276	1.48729	1.88536	2.23917	2.94226	3.78825	4.64468	2.69268	2.03286	1.69422	1.79237	1.09499	3.55252	5.29385	4.1099	1.22576	2.77064	2.89199	2.08867	2.44145	1.01631	0.758256
BnaA01g15750D	14.4514	21.2441	24.0086	15.8374	79.6308	94.9187	33.1222	26.9009	2.56488	1.87183	1.53468	3.00555	20.2675	15.5063	30.2548	14.8999	20.8466	25.2122	1.82452	2.1022	1.40939	2.39653
BnaA01g15760D	1.27604	1.36181	1.25581	1.5258	3.82814	3.20231	4.26223	3.12932	0.446612	0.21979	0.712328	0.509754	4.4565	2.32265	2.70379	1.61996	4.46776	1.96615	0.446565	0.671606	0.672036	0.638205
BnaA01g15770D	0	0.321669	0.215003	0.487381	0.228639	0	2.33872	1.3582	0	0.493917	0.135519	0.641371	0.32405	0.522148	0.748404	0.657115	1.39697	2.95298	0.357345	0.207878	0.514683	0.989168
BnaA01g15780D	44.2617	54.1497	43.7118	42.2557	81.3888	86.3123	132.525	149.673	30.4723	40.2126	14.9787	19.7625	112.564	140.268	123.901	89.7756	32.1855	168.062	4.47292	10.3533	8.97528	8.52586
BnaA01g15790D	4.43128	0	0	0	0	0	0	0	0	0	0	0	0	17.2759	0	0	0	0	0	0	0	0
BnaA01g15800D	0.570197	0.331483	0.521066	0.43864	1.78781	1.16176	0.426198	0.766319	0.193323	0.23203	0.200431	0.187004	0.313036	0.447335	0.436732	0.257583	2.70962	0.366553	0.0250536	0.0290072	0	0
BnaA01g15810D	12.156	7.60923	2.5514	2.43355	7.20932	8.82655	9.58142	6.16729	0.924458	0.799988	0	0.897278	16.679	9.17433	16.9048	4.8486	9.34321	10.3869	1.51168	2.24289	2.67057	4.20421
BnaA01g15820D	0.560286	1.0174	0.43105	0.241319	5.20904	6.07237	2.74019	1.9663	0.180381	0.176211	0.266412	0.064483	1.13924	12.5297	1.1582	0.421522	36.3193	5.83613	0.292006	0.168476	0.0559432	0.105683
BnaA01g15830D	0	0	0	0	0	0	0	0	0	0	0	0	0	0	0	0	0	0	0	0	0	0
BnaA01g15840D	7.69081	6.46934	3.7536	3.45451	7.10757	6.74571	12.1112	16.2651	9.79718	11.7841	9.1892	15.3954	11.3445	16.6947	12.0039	7.85844	10.1646	7.61836	6.51612	7.22551	8.03382	7.20309
BnaA01g15850D	0	5.77537	0	8.27954	0	0	0	0	0	0	0	0	0	0	0	0	0	0	3.60468	4.50788	0	14.112
BnaA01g15860D	0	0	0	0	0	0	0	0	0	0	0	0	0	0	0	0	0	0	0	0	0	0
BnaA01g15870D	5.27418	7.2097	3.59898	2.84257	13.6309	13.5427	9.05676	8.04929	1.48537	1.04631	0.20085	1.08772	10.0078	11.2264	10.0417	5.15429	9.1523	11.1404	4.84628	4.54143	2.28073	2.49208
BnaA01g15880D	4.62528	1.19978	0.0581191	0	7.76743	7.28256	3.86304	3.82253	0.199461	0.0981107	0	0.742647	6.48644	7.72466	4.24912	2.58396	1.38002	2.44573	0	0	0	0
BnaA01g15890D	0	0	0	0	0	0	0	0	0	0	0	0	0	0	0	0	0	0	0	0	0	0
BnaA01g15900D	7.0626	5.90079	10.6675	5.40466	8.70985	13.7234	8.70722	7.7424	2.29167	2.66629	4.12755	4.81905	3.48452	6.39065	6.96258	4.2268	2.57334	8.50321	0	0	0.120826	0
BnaA01g15910D	4.63333	7.61603	8.39262	8.90079	0.55692	0.82862	0.632046	1.29058	0	0	0	0	1.39544	0.666173	0.470613	0	1.05898	1.44321	0	0	0	0
BnaA01g15920D	0.493733	0.3165	0.47745	0.266373	0.331699	0.670474	0.783627	0.39563	0	0	0	0.0962997	0.608205	0.73576	0.399743	0.63424	0.777711	0.0856104	0	0	0	0
BnaA01g15930D	5.89242	1.07954	4.95544	1.35816	3.03782	5.09313	8.35853	2.8198	0	0	0	0	3.34636	3.36289	1.9236	1.7508	3.77069	1.66574	0	0	0	0
BnaA01g15940D	160.108	114.627	147.259	100.081	309.577	308.977	175.74	228.952	80.7956	73.8913	1.03101	6.32209	222.096	173.545	264.082	127.072	65.0684	61.8823	120.036	129.484	80.4032	74.3431
BnaA01g15950D	78.6283	63.3887	167.251	142.815	190.747	165.416	153.511	151.879	108.835	126.495	299.836	168.817	110.593	130.854	46.9878	23.6871	43.2238	27.4311	115.793	98.2136	102.092	106.22
BnaA01g15960D	2.39007	3.35058	12.0448	6.90948	7.9772	9.58627	13.2077	13.4386	0	0	0	0	5.7491	13.2981	9.89192	8.52686	9.81496	12.1325	0	0	0	0
BnaA01g15970D	0	0	0	0	0	0	0	0	0	0	0	0	0	0	0	0	0	0	0	0	0	0
BnaA01g15980D	0	0	0.0980114	0.114533	0.214904	0	1.85852	0.874013	0	0	0	0	0.214173	0.131378	0	0	0	0	0	0	0	0
BnaA01g15990D	0	0	0	0	0	0	0	0	0	0	0	0	0	0	0	0	0	0	0	0	0	0
BnaA01g16000D	3.52486	2.99834	3.04994	2.77213	0	0	0	0	0	0	0	0	0	0	0	0	0	0	0	0	0	0
BnaA01g16010D	1.35304	0.6506	0	0	2.48935	1.10811	0	0.218302	0	0	0	0	1.17176	0	2.16055	1.21223	3.27018	1.71442	0	0	0	0
BnaA01g16020D	1.42099	1.77167	0	0	2.41088	2.05794	0	2.35306	0	0	0	0	0	0	0.82306	1.44602	0	0	0	0	0	0
BnaA01g16030D	0.269223	0.572131	1.06933	0.81436	0.33253	0.589784	1.4689	1.47267	0	0	0.0538627	0.10292	0.232807	2.2826	1.30997	1.29811	0.263346	0.920389	0	0	0.122686	0.116026
BnaA01g16040D	0	0.250866	3.29269	0.598273	1.91311	2.78938	0	0.391945	2.01555	0.799138	0.90141	1.78609	0.785816	3.88894	4.31837	3.71409	2.01563	2.00726	0	0	2.37612	5.46063
BnaA01g16050D	1.38853	0.517034	2.08696	1.61447	1.56624	1.10735	2.17481	1.03319	0.341039	0.333697	0.131502	1.02501	0.870131	6.77959	2.67211	4.29205	1.4183	2.06583	0.185946	0.107733	0.853828	1.14941
BnaA01g16060D	2.71892	2.3856	4.63373	2.44156	5.0676	5.88658	4.04759	3.781	0.168632	0.48917	0.142658	0.13483	5.03372	3.64489	5.30879	3.42608	7.77164	5.19077	0.451269	0.312289	2.06514	1.86877
BnaA01g16070D	1.92218	0.406832	1.69411	1.26592	2.67237	2.72393	2.80704	3.21683	0.308937	0.242728	0.253949	1.05695	1.68034	4.90543	4.11858	2.43956	0.82162	3.11274	0.980816	0.436799	0.452723	0.575594
BnaA01g16080D	2.03414	1.99293	4.70586	2.5724	6.93456	5.46226	10.7818	9.31212	1.77516	0.771117	2.46147	0.489558	16.8216	9.12449	10.2824	3.84829	9.88974	10.5855	1.41249	0.674014	0.379353	0.458776
BnaA01g16090D	0.893067	0.784298	7.01377	9.07592	7.21061	3.50703	8.20803	6.03658	0	0.286481	0.878536	0.259342	10.7678	4.06246	7.36478	1.64735	15.3582	6.56455	0.444979	0.171149	0.337675	0
BnaA01g16100D	3.87363	7.33057	7.57396	5.78857	5.57815	6.77345	6.97219	7.45618	6.89827	5.66956	6.41018	7.46869	6.5447	9.72859	4.98086	2.48916	10.9036	7.87466	2.43476	3.82801	0.197987	0.195645
BnaA01g16110D	3.03203	1.89654	4.35807	3.08389	8.05318	7.72603	6.79807	6.31135	1.31113	0.696757	0.85175	1.34596	5.85525	6.10819	7.17725	5.33281	4.09935	8.29478	0.27118	0.0450495	0.136144	0.339138
BnaA01g16120D	0	0	0	0	0	0	0	0	0	0	0	0	0	1.19178	0	0	0	0	0	0	0	0
BnaA01g16130D	265.796	200.109	318.804	211.932	808.11	900.389	463.391	611.613	318.909	336.623	108.83	513.007	313.636	467.516	381.226	278.094	165.197	433.452	185.402	166.741	80.8203	81.0555
BnaA01g16140D	1.40854	2.01586	1.87844	1.52018	3.79915	4.6154	4.03472	4.27953	0.819742	0.317157	2.23571	1.05578	3.74879	4.04053	2.69203	2.93024	6.75762	3.96187	0	0.101475	0	0.0963101
BnaA01g16150D	0	0	0	0	0	0	0	0	0	0	0	0	0	0	0	0	0	0	0	0	0	0
BnaA01g16160D	0.453605	0.935078	0.213145	0.244341	0.44023	0	0.353196	0	0.179197	0.355302	0.545252	0.265845	0.247715	0.145865	0.409649	0	2.28974	0.115288	0.106161	0.367367	0	0
BnaA01g16170D	58.8708	31.9369	54.8421	50.2605	152.087	145.575	191.51	163.649	36.3704	30.1187	31.478	54.4364	47.3633	120.502	43.1565	20.3726	42.7068	63.638	48.6096	30.7247	0	0
BnaA01g16180D	0	0	0	0	0	0	0	0	0	0	0	0	0	0	0	0	0	0	0	0	0	0
BnaA01g16190D	0	0	0	0	0	0	0	0	0	0	0	0	0	0	0	0	0	0	0	0	0	0
BnaA01g16200D	0	0	0	0	0	0	0	0	0	0	0	0	0	0	0	0	0	0	0	0	0	0
BnaA01g16210D	0	0	0	0	0	0	0	0	0	0	0	0	0	0	0	0	0	0	0	0	0	0
BnaA01g16220D	0	0	0	0	0	0	0	0	0	0	0	0	0	0	0	0	0	0	0	0	0	0
BnaA01g16230D	0	0	0	0	0	0	0	0	0	0	0	0	0	0	0	0	0	0	0	0	0	0
BnaA01g16240D	2.28054	2.65216	3.85516	2.8831	8.47362	6.4499	6.539	4.90029	0.972739	0.295432	0.668179	1.28528	4.01992	6.77705	3.3017	2.55497	7.82633	4.93847	0.0425375	0	0	0
BnaA01g16250D	0	0	0.683311	0.707408	0	0	0	0	0	0	0	0	0	0	0	0	1.05014	0	0	0	0	0
BnaA01g16260D	2.8565	5.92636	3.85354	3.36358	1.15196	1.22827	5.37491	6.78518	0	0.125432	0	0	12.1176	19.4319	16.2601	11.1268	0.376836	5.0263	0	0	0.117748	0.112339
BnaA01g16270D	49.1994	35.2891	55.5363	30.3868	111.04	114.244	124.133	144.679	23.5568	16.9424	6.94941	11.6849	80.2361	63.3994	112.384	50.5533	28.0372	67.7082	11.8487	7.07344	0	0
BnaA01g16280D	0.914737	1.03688	2.0154	0.88687	3.51472	3.63423	3.64926	2.70913	0.151677	0	0	0	3.40911	1.04585	2.53247	1.96128	1.98372	2.30238	0	0	0	0
BnaA01g16290D	0	0	0	0	0	0	0	0	0	0	0	0	0	0.188735	0	0	0	0.148233	0	0	0	0
BnaA01g16300D	0.0731241	0.154432	0	0	0	0.335347	0	0.125547	0	0	0	0	0	0	0.441168	0.316404	0	0	0	0	0	0
BnaA01g16310D	0.223013	0.430864	0.439345	0.503066	2.49646	0	1.75666	2.55579	0	0	0	0	1.49785	1.09761	0.513829	0.457309	1.71192	0.443843	1.16173	3.09941	0	0
BnaA01g16320D	0	0	0	0	0	0	0	0	0	0	0	0	0	0	0	0	0	0	0	0	0	0
BnaA01g16330D	3.67456	5.77286	0.823055	0.830434	0.457098	0.903844	1.86547	2.72766	0	0.126609	0.236149	0.0814945	0.773464	2.44276	7.62838	4.15493	5.7713	4.02699	0	0	0	0
BnaA01g16340D	2.26655	1.8669	0	0	0	0	1.45338	0	0	0	0.545934	0	0	0.560819	1.59958	1.81397	2.00154	0.885016	0	0	0	0
BnaA01g16350D	0	0	0	0	0	0	0	0	0	0	0	0	0	0	0	0	0	0	0	0	0	0
BnaA01g16360D	7.06334	5.56369	8.97686	6.9396	17.9247	20.9037	13.5549	17.1865	0.64859	0.829666	1.46695	0.78175	7.24386	14.0761	15.7826	10.6965	8.86153	25.1821	0.164432	0.0636399	0.191679	0.178664
BnaA01g16370D	0.169799	0	0	0.609562	0.406924	0.388655	0.533049	0	0	0	0.255269	0	0.491546	0.411772	0	0	0.186281	0	0.13243	0.154261	0.155547	0.142516
BnaA01g16380D	0	1.0312	0	0	0	0	0	0	0	0	1.04201	0	0	0	0	0	0	0	0.815774	0	0	0
BnaA01g16390D	26.1776	20.4957	38.3047	24.0358	0	16.3598	61.3191	85.1693	0	2.59863	0	0	27.2818	42.5351	60.4899	35.5752	25.9632	0	0	0	0	0
BnaA01g16400D	1.42473	1.24209	0.179099	0	3.52864	0	0.865581	0	0.580542	0.560185	1.06811	0.716259	3.28536	1.54044	0.849038	0.186444	1.78513	0.707907	0.431448	0.167827	1.1843	1.59881
BnaA01g16410D	0	0	0	0	0	0	0	0	0	0	0	0	0	0	0	0	0.0838654	0	0	0	0	0
BnaA01g16420D	10.6699	15.4437	10.4479	10.5364	11.5828	12.9346	13.2158	12.3572	0.193437	0.429952	0.105862	0.170927	16.014	25.6789	13.8732	7.51548	16.7913	19.7051	0	0	0.0324865	0
BnaA01g16430D	4.30296	6.74501	6.7692	5.61131	10.7501	7.7589	11.7322	6.34358	1.3995	2.02455	1.11007	3.22421	21.8541	29.5522	27.6867	12.141	23.3377	18.6572	0.717635	2.09506	1.24791	1.64703
BnaA01g16440D	268.198	247.035	320.78	218.11	605.614	553.082	373.278	374.116	97.6773	92.4966	10.0978	116.04	790.363	1435.27	702.902	395.859	268.459	1184.67	4.67874	10.0679	12.7846	11.1009
BnaA01g16450D	5.11525	7.63336	1.41268	0.53595	4.7249	5.21641	5.04019	9.88568	0	0	0	0.57101	6.95049	7.284	18.6869	9.57139	2.27941	10.7122	0	0	0	0
BnaA01g16460D	0.44745	1.10365	0.159284	0.184366	2.18114	3.27726	0.760657	0.525442	0.950128	0.720323	0	0.254058	2.09138	1.48521	0.855963	0.760388	0.829484	1.35883	0	0	0	0
BnaA01g16470D	2.20878	2.0345	2.05283	2.65935	1.31559	2.56478	3.40955	2.2473	0	0.415091	0	0.37334	6.31992	5.69305	11.3047	3.67324	4.20815	4.94885	0.46349	0.27135	0.812348	1.32804
BnaA01g16480D	0	0	0	0	0	0	0	0	0	0	0	0	0	0	0	0	0	0	0	0	0	0
BnaA01g16490D	12.1867	5.02126	4.14323	4.4321	9.62593	11.033	11.1769	14.3889	1.73175	0.339836	0	2.272	7.56128	14.6403	28.292	15.375	3.76483	14.5055	0	0	0	0.206295
BnaA01g16500D	0	0	0	0	0	0	0	0	0	0	0	0	0	0	0	0	0	0	0	0	0	0
BnaA01g16510D	0.297058	0	0.149727	0.329352	0	0	0.24292	0.241554	0	0	0.0894117	0	0.596816	0.490651	1.28922	1.09294	1.36399	0.157696	0	0.0792444	0	0
BnaA01g16520D	1.5374	1.40112	2.49285	1.79523	2.69926	3.54173	1.88114	2.12438	0	0	0	0.234346	2.89038	2.63293	3.59415	2.66014	1.79272	1.44287	0.0563363	0.260914	0.0640818	0.311967
BnaA01g16530D	16.6992	30.1058	58.9335	45.4473	102.123	76.0309	47.8469	56.1323	0	0.71118	0	0	135.897	103.778	111.404	66.3706	80.945	42.9883	1.26822	1.06657	0	0.209001
BnaA01g16540D	4.65585	2.84208	2.42253	1.69221	0.861084	1.69928	1.11689	0	0	0.505184	1.16703	2.0492	7.72124	5.029	10.5893	7.61383	0.749338	4.03463	0.253749	0.885634	0.574364	1.42543
BnaA01g16550D	0	0	0	0	0	0	0	0	0	0	0	0	0.74285	0	0	0	0	0	0	0	0	0
BnaA01g16560D	10.3809	6.79415	11.1325	8.4735	13.0509	12.4811	11.4405	9.6543	0	0	0.150518	0.28604	18.758	22.4592	21.046	15.245	11.514	20.2167	0.387008	0.33804	0.223498	0.214929
BnaA01g16570D	0	0	0	0	0	0	0	0	0	0	0	0	0	0	0	0	0	0	0	0	0	0
BnaA01g16580D	0	0	0	0	0	0	0	0	0	0	0	0	0	0	0	0	0	0	0	0	0	0
BnaA01g16590D	0.330191	0.392895	0	0.93713	0	0.873818	0	0.545372	0	0	0	0	0.363919	0.458393	1.17399	0.372462	1.60011	0.350609	0	0	0	0
BnaA01g16600D	34.8735	34.4999	36.0367	34.7028	77.7988	74.2889	55.1323	61.847	2.64754	2.85879	0.940782	0.984732	75.1868	74.4393	126.141	69.2821	80.9403	81.5557	1.61023	1.97637	5.0203	4.80353
BnaA01g16610D	4.99381	8.66356	6.99337	6.7452	26.003	24.0254	8.22432	8.53067	1.35785	0.785882	0.645502	0.461247	12.5515	14.3388	14.9192	8.90237	17.507	16.3058	0.659471	0.516129	1.03425	0.364847
BnaA01g16620D	1.70598	5.45773	0	2.75724	9.34521	7.74496	1.42175	0	0	0	30.2483	0	0.83656	2.36666	1.90382	0	15.6331	0.866778	1.55324	6.49091	6.24823	6.49027
BnaA01g16630D	5.82305	5.12226	2.33898	5.0778	5.78714	4.93238	5.56708	2.79258	1.36963	1.41117	0	0	7.18175	3.31673	10.2453	7.21886	8.28371	6.57775	0	0	0	0
BnaA01g16640D	4.17075	2.20951	5.78162	4.67552	8.8845	12.2565	13.0144	12.4405	0	0.577142	0	0	11.8715	13.7027	12.279	8.1893	5.51551	13.8044	0	0	1.06333	0.508174
BnaA01g16650D	5.70564	3.57415	4.57943	2.21272	4.30014	8.31347	6.77261	7.61829	0.265029	0	0	0	9.47205	6.77832	12.739	6.74233	13.1428	12.4775	0.258069	0.452041	0.151543	0.147471
BnaA01g16660D	2.03564	2.43177	1.8096	1.4024	6.69141	2.87427	4.29213	3.8866	0.197383	0.587718	0.963216	0.350885	3.91767	2.22878	2.88352	1.91252	3.77067	3.97328	2.29323	2.30755	0.365439	0.796726
BnaA01g16670D	0	0	0	0	0.221282	0.219328	0	0	0.351538	0.345891	0	0.133594	0	0	0.517966	0	0.123343	0	3.10969	1.13071	0	0
BnaA01g16680D	0	0	1.07942	0	0.842966	0	1.0645	0	0	0	0	0	0.971596	1.24107	1.13959	0.329226	0	0.968814	0.278917	0	0.332141	0.313156
BnaA01g16690D	0	0	0	0	0	0	0	0	0	0	0	0	0	0	0	0	0	0	0	0	0.0843494	0
BnaA01g16700D	20.8971	17.3304	0.130369	0.439731	0.403464	0.396917	0.102982	0.104581	0	0	0	0	38.3473	1.04499	5.86088	14.0181	0.974264	0.38103	5.52234	1.15825	0	0
BnaA01g16710D	15.2797	10.2546	4.50239	2.63652	4.81964	4.74519	7.6899	4.87587	1.42395	1.61116	0.267313	1.60112	10.7711	5.63988	3.44916	2.95461	2.64006	4.17326	6.06293	3.81468	0.720139	0.521511
BnaA01g16720D	6.32617	5.98323	4.0397	3.1087	5.8279	6.40262	4.9174	2.79265	0	0	0	0	7.34427	5.41418	8.83605	5.19727	12.6278	8.82241	0.701696	0.974685	0.160772	0.629742
BnaA01g16730D	0	0	0	0	0	0	0	0	0	0	0	0	0	0	0	0	0	0	0	0	0	0
BnaA01g16740D	0	0	0.309261	0.34437	0	0	0.445399	0	0.44065	0	0	0	2.00226	0	0.640456	0.829647	1.26604	0	0	0	0.288195	0
BnaA01g16750D	1.30763	1.12474	1.03388	0.230035	0.89582	0.676033	2.6285	3.23784	0.503928	0.646102	6.27338	1.68699	0.416003	0.388788	0.361755	0.215079	0.583184	0	0	0	0.101624	0
BnaA01g16760D	0	0	0	0	0	0	0	0	0	0	0	0	0	0	0	0	0	0	0	0	0	0
BnaA01g16770D	0	0	0	0	0	0	0	0	0	0.165663	0	0	0	0	0	0	0	0	0	0	0	0.0969344
BnaA01g16780D	7.44946	6.75593	6.23664	6.3061	7.93207	5.82487	10.9494	10.1749	4.4756	4.71807	3.62507	1.87269	14.2726	12.6222	10.8607	6.99815	32.2127	12.1295	3.52447	4.25097	0.163624	0.0792056
BnaA01g16790D	0	0	0	0	0	0	0	0	0	0	0	0	0	0	0	0	0	0	0	0	0	0
BnaA01g16800D	1.09307	0	0	0	0	0	1.77012	0	0	0	0	0	1.01931	1.42866	1.17944	0	0	0	0	0	0	0
BnaA01g16810D	14.6582	0	0	0	0	0	7.25334	7.93686	0	0	0	0	8.43522	0	0	4.31469	0	0	0	0	0	0
BnaA01g16820D	0	0	0	0	0	0	0	0	0	0	0	0	0	0	0	0	0	0	0	0	0	0
BnaA01g16830D	16.2238	28.5932	17.9121	15.1038	13.4703	14.9293	17.5481	21.2089	0	0.403553	0	0	23.6752	30.4923	55.7123	26.1762	45.6906	44.4312	0	0	0	0.11511
BnaA01g16840D	1.83085	1.38296	1.67467	1.72624	1.83211	3.66896	1.08502	0.831486	0	0	0	1.21221	3.80201	0.625531	5.61877	1.41429	0.194774	0.335687	0.135376	0.156248	0	0
BnaA01g16850D	22.5685	22.6766	6.33004	9.79117	17.1351	13.4364	19.336	24.6275	4.01596	2.39154	0.886395	0.790432	27.7054	14.4199	26.0381	17.3334	28.735	35.4811	3.05677	2.5985	3.00144	2.99206
BnaA01g16860D	11.0713	16.3453	20.6778	21.9398	72.8187	33.8076	76.8158	88.2126	13.0791	13.9696	0	4.58539	98.9732	67.2572	74.4038	44.6733	0	0	23.1087	37.1962	0	0
BnaA01g16870D	1.26668	0.983729	2.71618	1.736	8.00246	5.76333	7.21878	6.39118	0.18202	1.23357	0.14691	0.697919	6.93808	6.57469	5.40973	3.67688	4.21373	10.1097	1.17254	1.14656	0.410793	0.300887
BnaA01g16880D	0	0	0	0	0	0	0	0	0	0	0	0	0	0	0	0	0	0	0	0	0	0
BnaA01g16890D	0	0	0	0	0	0	0	0	0	0	0	0	0	0	0	0	0	0	0	0	0	0
BnaA01g16900D	0	0	0	0	0	0	0	0	0	0	0	0	0	0	0	0	0	0	0	0	0	0
BnaA01g16910D	0	0	0	0	0	0	0.485596	0	0	0	0.389553	0	0	0.194863	0.170877	0	0	0.146183	0	0	0	0
BnaA01g16920D	0	0	0	0	0	0	0	0	0	0	0	0	0	0	0	0	0	0	0	0	0	0
BnaA01g16930D	0	0	0	0	0	0	0	0	0	0	0	0	0	0	0	0	0	0	0	0	0	0
BnaA01g16940D	0	0	0	0	0	0	0	0	0	0	0	0	0	0.921028	0	0	0	0.716925	0	0	0	0
BnaA01g16950D	0	0	1.02096	0	0	2.18909	1.33127	2.72336	0	0	1.17724	0	0	0	0	0	0	0	0	0	0	0
BnaA01g16960D	7.13086	6.50462	6.31937	3.11273	29.5748	20.5212	10.6656	7.26007	0	0	0	0	9.71993	7.7723	5.91171	6.51719	1.44375	5.3992	0	0	0	0
BnaA01g16970D	11.6277	7.60177	0.691459	1.3237	7.97793	11.623	6.39629	7.76806	3.6008	1.37828	0	2.19672	3.54237	8.4133	6.78537	3.14304	3.00446	2.35456	0.626527	1.08855	0	0
BnaA01g16980D	0	0	0	0	0	0	0	0	0	0	0	0	0	0	0	0	0	0	0	0	0	0
BnaA01g16990D	1.15954	2.26697	10.0563	10.915	18.5859	25.7788	17.8063	24.1302	0	0	0	0	16.4838	22.9599	21.0419	12.5085	5.78491	26.7054	0	0	0	0
BnaA01g17000D	1.54674	0.949453	2.33998	2.4658	9.46402	13.2293	5.52654	6.29419	1.06171	2.10829	0.238908	0.651045	7.22143	8.26908	5.70045	4.31474	0.986959	6.22412	0.639873	0.662229	0.168244	0.823898
BnaA01g17010D	8.68853	21.4334	0	0	6.00679	4.78782	0	2.37873	0	0	0	0	5.21679	13.5777	31.1236	4.05331	9.45267	4.23062	0	0	5.61203	0
BnaA01g17020D	10.0058	13.6439	0.349336	0.376272	2.36781	4.41854	0.459876	0	0.947072	1.4092	2.45809	1.94769	0	0	2.89035	1.7936	7.21037	1.12563	0	0	0	0
BnaA01g17030D	0	0	0	0	0	0	0	0	0	0	0	0	0	0	0	0	0	0	0	0	0	0
BnaA01g17040D	5.64392	10.4355	0	3.5225	8.32939	0	12.1199	9.19553	21.716	2.96889	56.6285	18.1899	4.82709	2.40081	5.91314	1.64084	5.92361	3.48956	0	2.01712	0	0
BnaA01g17050D	2.11837	0.955063	1.09629	0.96634	1.46079	1.6237	2.5864	2.53707	0	0	0	0	3.15013	3.3338	1.79172	1.51855	2.76197	1.65096	0	0	0	0
BnaA01g17060D	4.306	4.09456	6.69227	5.11551	9.43032	7.91254	5.74329	6.4932	2.25031	2.55687	0.66986	4.57603	9.91868	8.24155	9.29196	4.33427	8.89846	13.2805	1.98156	2.10806	0	0
BnaA01g17070D	2.59633	0.510247	1.04453	0.197345	2.21126	1.77299	1.05404	1.07341	0	0	0.197254	0.196137	0.882835	2.30208	0.383953	0.340511	0.18773	0.643256	0	0	0	0
BnaA01g17080D	0	0	0	0	0	0	0	0	0	0	0	0	0	0	0	0	0	0	0	0	0	0
BnaA01g17090D	0.130734	0	0	0	0	0	0	0	0	0	0	0	2.54312	2.02009	0	0	0	0	0.116499	0	0	0
BnaA01g17100D	3.42848	2.44876	1.68206	3.57755	4.6652	3.54342	1.28848	0.439557	0	0	0	0	3.07733	2.00002	1.87546	3.7887	2.39469	1.54583	0	0	0	0
BnaA01g17110D	0	0	0	0	0	0	0	0	0	0	0	0	0	0	0	0	0	0	0	0	0	0
BnaA01g17120D	0.150189	0	0.15595	0	0	0	0	0.253409	0	0	0	0	0.294143	0	0.171156	0.303173	0	0.284466	0	0	0	0
BnaA01g17130D	6.69576	2.57576	3.80434	3.74357	6.62626	6.4243	9.92628	8.78995	0.751738	0.121843	1.31057	0.77786	11.5173	5.89644	6.69875	2.29879	6.99172	4.34023	0.753616	1.03549	0	0
BnaA01g17140D	0.96849	0.897836	1.50312	1.46614	0.740239	1.47987	3.21307	1.82095	1.39785	1.71556	1.33691	1.36314	3.69296	2.93275	4.54415	3.03673	1.7591	2.77103	1.01859	0.344913	0	0
BnaA01g17150D	0.631701	1.08067	0.55286	0.945926	0.312381	0	1.92295	1.11566	0	0	0	0	0.813463	1.31469	1.05438	0.410381	1.31526	0.390436	0	0	0	0
BnaA01g17160D	0	0	0	0	0	0	0	0	0	0	0	0	0	0	0	0	0	0	0	0	0	0
BnaA01g17170D	0	0	0	0	0	0	0	0	0	0	0	0	0	0	0	0	0	0.279418	0	0	0	0
BnaA01g17180D	0	0	0	0	0	0	0	0	0	0	0	0	0	0	0	0	0	0	0	0	0	0
BnaA01g17190D	0	0	0	0	0	0	0	0	0	0	0	0	0	0	0	0	0	0	0	0	0	0
BnaA01g17200D	0	0	0	0	0	0	0	0	0	0	0	0	0	0	0	0	0	0	0	0	0	0
BnaA01g17210D	0	0	0	0	0	0	0	0	0	0	0	0	34.0006	148.66	0	0	0	0	0	0	0	0
BnaA01g17220D	0	0	0	0	0	8.12071	0	0.945697	0	0	8.63208	1.51315	0	0	0	0	0	0	0	0	0	0
BnaA01g17230D	0	0	0	0	0	0	0.745166	0	0	0	0	0	2.4579	0.600566	1.69888	0	0	1.92756	0	0	0	0
BnaA01g17240D	0	0	0	0	0	0	0	0	0	0	0	0	0	0	0	0	0	0	0	0	0	0
BnaA01g17250D	0	0	0	0	0	0	0	0	0	0	0	0	0	0	0	0	0	0	0	0	0	0
BnaA01g17260D	0	0	0	0	0	0	0	0	0	0	0	0	0	0	0	0	0	0	0	0	0	0
BnaA01g17270D	0	0	0	0	0	0	0	0	0	0	0	0	0	0	0	0	0	0	0	0	0	0
BnaA01g17280D	0	0	0	0	2.74597	2.32193	0	0	0	0	0	0	0	0	0	0	0	0	0	0	0	0
BnaA01g17290D	0	0	0	0	0	0	0	1.48865	0	0	0	0	0	0	0	0	0	0	0	0	0	0
BnaA01g17300D	0	0	0	0	0	0	0	0	0	0	0	0	0	0	0	0	0	0	0	0	0	0
BnaA01g17310D	0	0	0	0	0	0	0	0	0	0	0	0	0	0	0	0	0	0	0	0	0	0
BnaA01g17320D	0	0	0	0	0	0	0	0	0	0	0	0	0	0	0	0	0	0	0	0	0	0
BnaA01g17330D	0.677757	0.527546	0.967137	0.697563	0.556082	0.560062	0.887676	0.292531	0	0	0	0	0.285775	1.08808	0.685083	0.200704	0.445093	0.979197	0.078265	0	0	0
BnaA01g17340D	0	0	0	0.0905543	0	0	0	0	0	0	0.286605	0	0.169904	0	0.0923371	0	0.181399	0	0.216788	0	0	0.160193
BnaA01g17350D	30.4276	26.8339	1.26076	1.50639	88.8388	63.5084	32.821	56.7414	24.7052	23.7891	4.51074	4.09594	0.857568	1.20083	2.18016	0	2.06794	18.3632	0	0	0	0
BnaA01g17360D	12.275	3.98645	0.735813	2.44139	10.5696	3.08484	10.8815	12.2869	4.48145	2.7773	4.92615	1.36206	17.2451	16.5108	24.0339	13.2563	11.4099	19.6604	0	0	0	0
BnaA01g17370D	0	0	0	0	0	0	0	0.719154	0	0	0	0	0	0	0	0	0	0	0	0	0	0
BnaA01g17380D	0	0	0	0	0	0	0	0	0	0	0	0	0	0	0	0	0	0	0	0	0	0
BnaA01g17390D	0	0	0	0	0	0	0	0	0	0	0	0	0	0	0	0	0	0	0	0	0	0
BnaA01g17400D	1.84509	0.583478	2.4177	1.68189	2.74539	3.94843	0.868483	4.41402	0.446271	0.432368	0	0	2.43743	4.73012	4.91663	4.18079	2.49627	6.00629	0.23776	0	0.265201	0.269242
BnaA01g17410D	2.68795	2.11299	4.23812	2.17618	6.77563	6.33409	6.53738	3.82054	1.14749	0.790203	0.543818	0.627393	3.08908	3.62053	6.29746	3.42023	0.962158	7.75441	0	0	0	0
BnaA01g17420D	8.14102	7.03419	9.44344	4.43649	14.1674	15.1519	13.3896	11.0121	0.923249	1.03549	0	0	9.92005	12.0487	10.0173	5.43466	7.31915	8.23208	0.0772984	0	0	0
BnaA01g17430D	0	1.6066	1.77996	1.9626	0	1.86633	0	1.08631	0	0	0	0	0	0.917598	1.47369	1.31632	0	0	0	0	0	0
BnaA01g17440D	1.32811	1.64169	1.99101	0.635672	4.48694	8.20163	0	0.899928	0	0	0	0	0	0	0	0	0.31721	0	0	0	0	0
BnaA01g17450D	11.9285	6.86928	24.9538	17.1923	56.6718	59.2733	51.9448	45.9308	13.4739	15.7994	2.76465	12.6326	24.9943	51.4204	41.5254	30.2321	15.0109	40.6606	4.46544	5.63161	10.7439	9.37243
BnaA01g17460D	3.06471	2.02522	4.89182	4.18411	1.56868	2.25054	0.268968	0.285295	0	0	0.307944	0.263623	3.33753	3.07601	4.38453	2.10406	3.36247	2.23212	0	0	0	0
BnaA01g17470D	0	0	0	0	0	0	0	0	0	0	0	0	0	0	0	0	0	0	0	0	0	0
BnaA01g17480D	1.08906	2.56967	0.72238	0	0.556007	0	0	0	2.16325	1.82774	2.05689	1.56984	0	0	0	0	0	0	0.200029	0.461948	0.224805	0.889778
BnaA01g17490D	4.62379	2.63028	6.75824	5.12566	10.6838	9.07951	9.33208	7.17952	4.18333	4.2731	1.95407	5.98237	5.69907	5.27161	6.01353	4.12491	6.68194	5.79303	0.722954	0.724742	0.419922	0.442478
BnaA01g17500D	0.997092	1.64549	3.91097	3.37693	1.25822	2.44904	6.99141	11.2855	0	0	0.251202	0.240918	2.81992	2.46667	5.00603	3.12147	1.39437	1.92027	0	0	0.163755	0.79653
BnaA01g17510D	0.513072	0.165742	1.30213	0.932433	3.04047	1.92518	2.40974	2.77455	0.273284	0.787368	0.250934	0.151587	2.73014	2.3502	3.41535	1.94214	1.92753	1.59108	0.699724	1.39435	0.644458	0.33155
BnaA01g17520D	0	0	0	0	0.594347	0	0	0	0	0	0	0	0	0	0	0	0	0	0	0	0	0
BnaA01g17530D	10.0552	4.03503	1.85187	1.958	26.0707	30.2048	4.28793	11.8354	25.2632	32.7678	0	5.9812	1.96393	15.2639	3.58904	1.93626	12.2458	4.53539	16.0688	29.7166	8.68033	14.202
BnaA01g17540D	0	0	0	0	0.441873	0	0	0.307315	0	0	0	0	0	0	0	0	0	0	0	0	0	0
BnaA01g17550D	7.53024	8.82216	16.7613	15.4178	29.1381	17.5939	29.5555	25.2949	0.125488	0.123744	0	0	17.525	32.3657	24.8369	20.4636	27.7537	21.4662	0	0	0	0
BnaA01g17560D	4.99463	6.12621	5.95512	6.09251	9.69286	5.63396	11.4505	9.39724	2.39653	2.60954	5.19592	1.92878	11.6281	10.9123	12.3717	4.31661	6.69558	9.49659	0.902064	1.77713	1.58422	1.88206
BnaA01g17570D	9.49686	14.6441	93.2234	94.9391	105.447	89.7357	91.5219	82.4653	0.442059	2.14558	2.64567	0.194694	193.695	176.36	204.479	81.4045	566.073	196.288	0.80713	0.541479	0.276146	0.386511
BnaA01g17580D	4.95583	3.92785	5.19398	3.93329	9.33684	9.9659	8.23334	5.93479	0.923443	1.34553	1.13518	1.98101	10.9948	9.74883	7.61843	5.22475	5.03366	7.37995	0.0866574	0	0	0
BnaA01g17590D	0.859105	0.484149	0.623363	0.282074	1.35071	0	0.585265	0	0.196366	0.19317	0.343516	0.158514	0.389383	0.625876	0.29431	0.131755	0.143089	0.626866	0	0.12305	0.369599	1.04552
BnaA01g17600D	0.450225	0.917111	0.248255	0.0942157	0.174061	0.701098	0.279731	0.422678	0.434621	0.553638	0.86853	1.35614	0.279273	0	0.329075	0.194248	0	0.0929271	0.446539	0.513204	0.167632	0.163493
BnaA01g17610D	5.9538	7.88956	0.782095	0	4.27117	7.27845	1.92594	1.17219	0	0	0	0	0.242179	3.3578	0	0	0	2.16666	0	0	0	0
BnaA01g17620D	0	0	0	0	0	0	0	0	0	0	0	0	0	0	2.75134	0	0	0	0	0	0	0
BnaA01g17630D	54.2205	39.0009	58.536	39.4934	129.132	132.284	135.186	124.01	20.3426	18.5092	6.20416	23.8787	129.445	137.669	124.514	82.1969	86.0448	184.311	0.0644726	0	0	0
BnaA01g17640D	0	0	0	0	0	0	0	0	0	0	0	0	0	0	0	0	0	0	0	0	0	0
BnaA01g17650D	0	0.0558228	0	0	0	0	0.091298	0.185258	0	0	0.0615042	0.0620109	0.248656	0.0738794	0.211759	0.0632372	0.137325	0	0	0	0	0
BnaA01g17660D	14.5186	14.5351	10.8036	0	43.8911	32.9911	13.1393	14.9015	0	0	0	0	36.6393	69.2133	62.1972	23.427	49.4617	67.4593	0	0	0	0
BnaA01g17670D	0	0	0	0	0	0	0	0	0	0	0	0	0	0	0.341772	0	0	0	0	0	0	0
BnaA01g17680D	0	0	0	0	0	0	0	0	0	0	0	0	0.173444	0	0.387557	0	0.189638	0	0	0	0	0
BnaA01g17690D	16.3363	10.225	21.6921	14.1241	34.5702	36.3927	26.4013	24.9894	0	0	0	0	32.3715	25.9556	33.4253	18.1313	19.3664	25.5768	8.79485	9.9481	7.46399	8.35884
BnaA01g17700D	28.1125	22.8813	41.5657	19.6287	123.025	132.69	28.3018	26.3993	10.3797	11.5949	4.2365	27.9108	32.5611	26.9696	47.7592	18.1774	6.76476	29.8018	14.1582	27.2185	15.0824	11.3021
BnaA01g17710D	35.3551	31.1909	14.8826	7.01575	26.8466	30.9706	33.157	24.1545	1.78637	0.877964	0	0	40.297	45.6767	13.0059	5.75658	11.7511	20.8538	0	0	0	0
BnaA01g17720D	3.53308	3.41157	4.07734	3.11663	8.3162	9.37333	6.82977	7.32633	0.646369	0.877582	0.997417	0.717014	11.9366	9.58956	15.8909	9.8735	10.2251	9.83871	0.561353	0.779457	0.514811	0.941216
BnaA01g17730D	0	0	0	0	0	0	0	0	0	0	0	0	0	0	0	0	0	0	0	0	0	0
BnaA01g17740D	7.44368	2.50215	5.45535	3.28113	12.6657	15.4975	15.5457	12.2473	1.78218	1.72252	0.473782	1.64717	16.4358	17.9126	16.8878	9.95694	6.32126	16.69	1.20007	0.811553	0.521569	0.48507
BnaA01g17750D	1.96349	2.77374	3.06758	2.4053	6.38307	7.34609	1.96484	2.28057	0.135968	0.266112	0.686244	0.65025	7.23238	5.93423	5.75656	2.52159	7.23556	5.47043	0	0.179258	0	0
BnaA01g17760D	14.4221	12.2649	13.1991	12.6444	30.6456	38.5045	26.7203	29.5518	4.11895	3.05901	3.06609	6.59801	30.1614	34.9674	31.3879	18.9854	17.6417	38.8299	0.0631204	0.220552	1.08843	1.03395
BnaA01g17770D	0.638649	0.922137	0.131641	0	0	0	0	0	0	0	0	0	0.395273	0.159648	0.151107	0.403195	0.292909	0.128923	0	0	0	0.245221
BnaA01g17780D	7.09448	10.7328	0.734875	0.418137	0.829979	3.03524	0.519052	0	0	0	0	0	0	0.415663	0	0	0	0	0	0	0	0.326499
BnaA01g17790D	2.09691	0.71732	0.759617	0	1.83627	0.83723	1.13249	1.14445	0	0	0	0	1.76705	0.878062	0.829341	0.356248	1.98291	2.78549	0	0	0	0
BnaA01g17800D	0	0	0	0	0	0	0.54444	0.281981	0	0	0	0	2.33244	3.07544	0	0	0	0.166113	0	0.153667	0	0
BnaA01g17810D	2.57446	2.62161	2.73956	4.20468	1.74648	1.78218	6.42428	4.4732	0	0	0.153092	0	3.46112	3.92177	5.59964	1.84427	4.11912	3.12385	0	0.112141	0	0
BnaA01g17820D	0	0	0	0	192.302	95.6665	75.0542	90.7557	0	0	0	0	60.9959	83.7579	50.1143	15.2192	0	61.3263	0	0	0	0
BnaA01g17830D	11.5394	12.3416	2.15276	4.77738	34.2394	38.6926	33.9192	33.157	0	0	0	0	22.7608	15.901	28.0768	9.87657	14.6374	16.3136	0	0	0	0
BnaA01g17840D	2.77129	1.26008	3.91758	1.822	8.59911	11.459	6.82813	7.14133	0	0	0	0.518103	5.41104	7.18916	5.06489	2.4786	0.649359	7.15444	0	0.333343	0	0
BnaA01g17850D	0	0	0	0	0.478801	0	0	0	0	0	0	0	0.198408	0	0	0	0	0	0	0	0	0
BnaA01g17860D	2.00132	2.16727	0.951966	1.59402	2.69574	3.22801	2.59849	1.90633	0	0.137116	0	0	3.35059	3.00774	3.52308	1.33254	2.58688	1.37641	0	0	0	0
BnaA01g17870D	0	0	0.0585436	0.0658025	0.232992	0.335459	0	0	0	0	0	0.196974	0.270237	0.157135	0	0.0665744	0.0717269	0.183286	0	0	0	0
BnaA01g17880D	0	0	0	0	0	0	0	0	0	0	0	0	0	0	0	0	0	0.318951	0	0	0	0
BnaA01g17890D	7.88558	4.38163	6.15897	5.46527	10.5148	11.6835	7.95793	11.3296	1.50537	1.91896	3.29505	3.15799	11.9025	11.4756	12.7912	11.5425	9.34272	13.975	1.82877	1.46083	1.43524	0.74722
BnaA01g17900D	0.196177	0.134622	0.183202	0.156262	0.0907306	0.258836	0.0785393	0.154955	0	0	0	0	0	0.128561	0	0	0.0616529	0.31348	0	0	0	0
BnaA01g17910D	0.742156	0.213048	1.68832	0.957561	1.41034	1.17135	1.55659	1.58884	0	0	0	0	1.18745	1.19328	0.882394	0.781558	1.67161	0.956221	1.33512	0.817138	0.100678	1.07909
BnaA01g17920D	0	0	0	0	0	0	0	0	0	0	0	0	0	0	0	0	0	0	0	0	0	0
BnaA01g17930D	8.54136	13.3604	9.80819	10.231	15.6432	9.17509	25.158	20.5231	0	0	1.09185	0	20.3448	25.2831	27.1882	9.20213	50.0546	12.0058	4.58664	2.91111	3.14532	3.58495
BnaA01g17940D	2.44269	5.1408	11.8058	12.1638	16.124	12.5	21.4642	22.3549	2.36812	3.33703	24.657	2.38697	8.7216	9.37201	12.211	10.9311	57.0329	8.9212	0.816288	0.543712	0	0.0622884
BnaA01g17950D	2.97821	1.49497	1.61638	1.02165	1.99159	2.67677	1.67152	2.70123	0	0	0	0	2.34988	3.47699	3.64928	2.33141	1.79015	1.88871	0.239162	0.138954	0	0
BnaA01g17960D	8.46124	5.22686	7.86907	5.61797	26.0941	33.2099	11.1483	13.6154	0	0.5381	0	0	14.61	12.2231	12.8704	9.42689	8.35707	13.5092	0	0	0	0
BnaA01g17970D	0	0	0	0	0	0	0	0	0	0	0	0	0	0	0	0	0	0	0	0	0	0
BnaA01g17980D	9.5813	12.9454	9.75736	5.76979	7.45238	9.37867	9.28083	10.7028	0	0	0	0	6.35768	8.15445	8.2929	5.18851	11.0361	4.50205	0	0	0	0.169069
BnaA01g17990D	45.1891	58.9366	84.0846	86.875	160.709	172.483	180.063	191.879	33.5736	29.4928	60.0653	50.0603	124.046	141.784	218.724	232.595	260.424	158.621	5.2045	4.8313	5.59432	5.79801
BnaA01g18000D	0.213372	0	0	0	0	0	0	0	0	0	0	0	0.209202	0.271529	0	0	0	0.211746	0	0	0	0
BnaA01g18010D	5.22559	3.23742	2.47871	2.79828	5.8505	4.84324	5.00983	6.38724	0.939782	0.616313	4.80908	2.22118	5.66397	8.67697	8.51094	5.12082	8.85973	7.59929	1.16793	1.27269	0.975729	1.21164
BnaA01g18020D	0.0632065	0	0	0	0	0	0	0	0	0	0	0	0	0	0.0762502	0.137937	0.0722912	0	0	0	0	0
BnaA01g18030D	8.28201	10.5842	14.8567	7.99881	51.744	48.6602	23.3688	20.3894	4.65842	4.83497	8.85495	15.982	7.71325	16.098	9.01213	4.36972	11.8895	6.06224	0.96972	2.29688	2.18388	2.17715
BnaA01g18040D	2.0702	1.06457	4.14438	1.94021	3.29323	4.68904	7.58261	6.28326	0.866979	0.259558	0	0.837418	7.90318	8.08059	6.8337	4.15499	2.28744	5.66106	0.836796	1.14024	0.170752	0.160372
BnaA01g18050D	96.7419	94.4178	101.763	88.604	0	0	78.6227	101.427	37.9989	31.5089	0	2.0309	223.892	232.799	340.237	209.685	47.5172	17.0941	1.62114	4.41265	41.9788	37.491
BnaA01g18060D	1.92242	0.494149	1.57117	1.30679	3.25609	3.73388	1.50275	1.88849	0.277898	0.406128	0.0507044	0.689083	2.76172	5.01342	3.34645	2.58386	0.297167	4.37767	0.152763	0.177979	0	0
BnaA01g18070D	1.37922	1.69433	2.44987	1.58934	5.75595	4.12447	4.37428	3.49469	0.9655	0	0.218562	0.59715	5.43989	4.48426	4.04946	2.6526	3.25756	7.42318	0.951198	1.1007	0.270867	0.667176
BnaA01g18080D	0.750419	0.229304	0.288332	0.263227	0.489662	0.732524	0.394268	0.597296	0	0	0	0	1.5557	2.37819	1.66246	0.9355	0.285896	0.564695	0.105043	0.0604045	0	0.0561367
BnaA01g18090D	0	0	0	0	85.6028	84.3448	45.5011	43.0818	16.4572	15.1324	32.143	18.7444	48.2615	48.0276	55.0492	25.1861	24.4574	26.151	6.31068	5.05217	0	0
BnaA01g18100D	0	0	0	0	0	0	0	0	0	0.16013	0	0	0	0	0	0	0	0	0	0	0	0
BnaA01g18110D	0	0	0	0	0	0	0	0	0	0	0	0	0	0	0	0	0	0	0	0	0	0
BnaA01g18120D	0	0	0	0	0	0	0	0	0	0	0	0	0	0	0	0	0	0	0	0	0	0
BnaA01g18130D	0.487594	1.31097	0.312706	0.950694	1.40779	0.886011	0.32021	0.824881	0	0	0	0	0.513716	1.48936	0.458548	0.402	0.883118	0.195669	0	0	0	0
BnaA01g18140D	0	0	0	0	0	0	0	0	0	0	0	0	0	0	0	0	0	0	0	0	0	0
BnaA01g18150D	0	0	0	0	6.52598	4.8629	0	0	0	0	0	0	0	0	0	0	5.27735	0	0	0	0	0
BnaA01g18160D	13.1009	14.7596	12.3775	7.68436	22.7822	20.6146	29.5524	16.8076	6.98341	4.67999	12.5987	5.34134	38.132	38.1495	33.2274	23.2142	21.2509	23.1517	1.78455	1.99329	1.77919	1.57357
BnaA01g18170D	0.951264	1.07578	1.50999	0	1.68602	1.63078	0.530111	2.78977	0	0.532309	1.09831	0	2.23569	2.45675	0.365996	0.967501	4.26706	0.319507	0	0	0	0
BnaA01g18180D	18.2145	3.9131	3.68224	1.2503	29.394	30.2955	6.26801	1.51568	0	0	0	0	43.0941	0.736181	1.52831	9.76852	1.64663	6.56157	0	0	0	0
BnaA01g18190D	0	0	0	0	0	0	0	0	0	0	0	0	0	0	0	0	0	0	0	0	0	0
BnaA01g18200D	0	0	0	0	0	0	0	0	0	0	0	0	0	0	0	0	0	0	0	0	0	0
BnaA01g18210D	0.138729	0.274593	0.275255	0.386333	0.421283	0.285686	0.109471	0.334482	0.114685	0	0.0667666	0.0721639	0.150845	0.36306	0.0854239	0.236294	0.65668	0.287046	0	0	0.0704125	0.0695645
BnaA01g18220D	0	0	0	0	0	0	0	0	0	0	4.48887	0	0	0	0	0	0	0	0	0	0	0
BnaA01g18230D	0	0	0	0	0	0	0	0	0	0	0	0	0	0	0	0	0	0	0	0	0	0
BnaA01g18240D	0	0	0	0	0	0	0	0	0	0	4.67512	0	0	0	0	0	0	0	0	0	0	0
BnaA01g18250D	0	3.73097	0	0	0	0	0	0	0	0	0	2.71211	0	0	0	0	0	0	0	0	0	0
BnaA01g18260D	0	0	0	0	0	0	0	0	0	0	0	0	0	0	0	0	0	0	0	0	0	0
BnaA01g18270D	0.994323	1.31859	0	0	8.07567	6.54394	1.668	6.72899	0	0	4.29583	0	0	0	1.09633	0.932229	2.17701	9.94371	0	0	0	0
BnaA01g18280D	5.30483	0.710958	4.00941	1.48325	3.54533	5.12245	2.76583	3.86676	0	0	0	0	7.4625	9.45889	10.3466	5.59365	3.20874	9.63831	0	0	0	0
BnaA01g18290D	0	0	0	0	0	0	0	0	0	0	0	0	0	0	0	0	0	0	0	0	0	0
BnaA01g18300D	0	0	0	0	0	0	0	0	0	0	0	0	0	0	0	0	0	0	0	0	0	0
BnaA01g18310D	0	0	0	0	0	0	0	0	0	0	0	0	0	0	0	0	0	0	0	0	0	0
BnaA01g18320D	5.93205	4.23476	7.68767	7.5496	3.53182	4.0926	8.93707	5.15791	0	0.534352	0.116259	0.109508	36.6922	7.51641	24.355	9.55163	10.2984	21.5722	0.0742873	0	0	0.0815978
BnaA01g18330D	8.09845	1.63664	4.44258	3.30364	2.72382	5.96213	4.46312	11.4102	0	0	0	0	5.19597	6.81983	14.8322	9.00114	0.978501	7.28224	0	0	0	0
BnaA01g18340D	2.03198	1.72056	2.94944	2.47833	3.17084	2.91832	3.11905	3.31637	0.10776	0.258945	0.0719775	0.463509	2.62028	6.24191	4.7752	2.4349	9.89076	3.36612	0.441762	0.27266	0.274078	0.250332
BnaA01g18350D	5.92516	5.09358	8.43517	6.71887	79.4342	65.2499	42.6359	37.8344	1.91324	1.99265	0.556743	5.90208	26.2578	33.8141	38.1559	14.7957	17.4226	38.7474	0	0	0	0
BnaA01g18360D	5.90021	7.13993	6.83786	6.02467	14.1278	12.481	6.92539	8.34262	0	0.0704618	0	0	8.418	10.6296	7.25819	6.95464	11.0693	10.3972	0.537182	0.488057	0.176532	0.378253
BnaA01g18370D	0	0	0	0	0	0	0	0	0	0	0	0	0	0	0	0	0	0	0	0	0	0
BnaA01g18380D	4.09835	4.08134	10.8752	7.12893	10.344	7.16246	7.28123	6.03761	0	4.3	0.249369	1.01653	6.37082	6.36511	5.97083	1.27382	5.88051	20.9062	0	0.616589	1.42316	0
BnaA01g18390D	36.873	6.95089	34.8639	24.2397	49.667	42.0022	43.2596	57.5815	1.65267	3.81381	0	2.16218	46.4372	34.0586	69.5455	46.1531	9.64378	71.4221	0.284639	0.335104	0	0.65543
BnaA01g18400D	0	0	0.118487	0	0	0	0	0.382586	0	0	0	0	0	0	0	0.119233	2.51549	0	0	0	0	0
BnaA01g18410D	57.168	85.5053	54.1953	59.8914	77.0173	64.0933	65.9857	68.3893	6.43163	7.2997	8.47639	3.34538	81.5484	123.467	168.321	111.592	65.8123	156	0	0	0	0
BnaA01g18420D	0	0	0	0	0	0	0	0	0	0	0	0	0	0	0	0	0	0	0	0	0	0
BnaA01g18430D	6.8627	6.21353	6.68415	3.50593	20.1988	18.1128	18.0963	17.0665	2.43862	1.64506	4.49872	1.57648	12.4644	13.5311	14.4406	8.24145	7.40544	15.4192	0	0	0	0
BnaA01g18440D	0	0.939414	2.18713	0	0	0	0	1.28073	0	0	0	0	0	1.0214	0	0	0	0	0	0	0	0
BnaA01g18450D	0.336866	2.21925	0.542227	0.659019	0.0796439	0.0801207	1.13627	0.608188	0.068827	0.0659238	4.96164	0.107865	0.04464	0.425537	0.304535	0.137581	1.03436	0.434805	0.0367446	0	0	0.0791329
BnaA01g18460D	5.1082	4.21142	3.07149	3.4972	10.1994	12.2583	8.16002	10.4232	5.37072	5.15679	5.265	6.46118	8.26658	13.6454	7.44654	5.34974	6.48136	5.47928	14.9145	17.7506	0.2774	0
BnaA01g18470D	29.0856	26.9314	47.1736	43.55	80.7785	72.9802	46.2711	73.7844	1.29373	2.28375	2.56455	3.41523	71.7318	108.671	124.92	60.5461	52.0021	77.6824	0.688164	2.41633	0	0
BnaA01g18480D	4.90638	1.71516	3.79795	2.10991	6.383	5.79706	5.48454	6.55239	1.64324	1.98046	0.76399	4.74131	5.29557	8.12765	9.49816	6.5791	1.82172	9.33653	0.969831	1.55092	0	0
BnaA01g18490D	0	0	0	0	0	0	0	0	0	0	0	0	0	0	0	0	0	0	0	0	0	0
BnaA01g18500D	0	0	0	0	0	0	0	0	0	0	0	0	0	0	0	0	0	0	0	0	0	0
BnaA01g18510D	0	0	0	0	0	0	0	0	0	0	0.306189	0	0.222527	0	0	0	0	0	0	0	0	0
BnaA01g18520D	0	0	0	0	0	0	0	0	0	0	0	0	0	0	0	0	0	0	0	0	0	0
BnaA01g18530D	0.100802	0.599967	1.92893	1.3853	0.223848	0.218597	0.160446	0	0	0	0.737687	0	0.305813	1.375	0.478953	0.312757	7.95661	0.100286	0	0	0	0
BnaA01g18540D	0	0.203505	0	0	0	0	0.331976	0.170312	0	0	0	0	0.308477	0	0	0	0.230809	0.102283	0	0	0	0
BnaA01g18550D	10.7775	7.01798	10.6976	7.25196	10.2139	14.7598	11.3369	7.7449	5.72662	4.84004	2.19137	5.08392	12.4283	10.7936	11.5862	7.01782	4.07371	9.9998	5.33418	4.43182	2.29195	3.14425
BnaA01g18560D	0	0	0	0	0.533624	0	0.359009	0	0	0	0	0	0	0	0	0	0	0	0	0	0	0
BnaA01g18570D	0.92984	0.573758	1.03689	0.723602	0.748648	0.734263	0.590829	1.31499	0	0	0	0	0.751893	0.68048	2.07167	1.41692	0.891367	1.70829	0.144336	0	0	0
BnaA01g18580D	0.789073	0.350617	2.00228	1.04587	0.977715	1.34498	1.58665	1.34147	1.80828	2.24567	6.19356	6.16961	0.753411	1.32168	1.66064	0.684934	1.07823	0.468886	0.10252	0.716633	0.295826	0.345113
BnaA01g18590D	0.257428	0	0	0	0	0	0	0	0	0	0.50665	0	0	0	0	0	0	0	0.308882	0	0.719627	0.115806
BnaA01g18600D	0	0	0	0	0	0	0	0	0	0	0	0	0	0	0	0	0	0	0	0	0	0
BnaA01g18610D	0	0	0	0	0	0	0	0	0	0	0	0	0	0	0	0	0	0	0	0	0	0
BnaA01g18620D	0	0	0	0	0	0	0	0	0	0	0	0	0	0	0	0	0	0	0	0	0	0
BnaA01g18630D	2.22855	1.50085	4.03065	2.48857	2.05463	2.43706	1.96122	0.770101	0.30619	0.449332	0	0	1.88988	2.59221	1.68053	1.40042	2.71611	1.52298	0.3066	0.445486	0.0891849	0.426604
BnaA01g18640D	0	0	0	0	0	0	0	0	0	0	0	0	0	0	0	0.084995	0	0	0	0	0	0
BnaA01g18650D	0	0	0.113994	0	0	0	0	0	0	0	0	0	0	0	0	0	0	0	0.289086	0.225137	0.112929	0.106171
BnaA01g18660D	0	0	0	0	0	0.234583	0.172297	0	0	0	0	0.141783	0.110911	0.13226	0	0.112421	0.119076	0	0.261552	0	0	0
BnaA01g18670D	4.77043	4.99601	2.74797	1.69379	2.55365	2.48938	3.45259	3.83571	0	0	0	0	6.70357	5.16175	4.63122	2.00125	9.9389	4.32366	0	0.164664	0	0.15706
BnaA01g18680D	0	0	0	0	0	0	0	0	0	0	0	0	0	0	0	0	0	0	0	0	0	0
BnaA01g18690D	0.402952	0.376526	0.996261	1.30608	0.552061	1.15418	1.04762	1.29875	0	0	0	0	1.6459	1.4307	2.34688	1.21931	0.289379	0.650642	0	0	0	0
BnaA01g18700D	0	0	0	0	0	0	0	0	0	0	0	0	0	0	0	0	0	0	0	0	0	0
BnaA01g18710D	0.241847	0	0	0	0	0	0	0	0	0	0	0	0	0	0	0	0.14429	0	0	0	0	0
BnaA01g18720D	0	0	0	0	0	0.120815	0	0	0	0	0	0	0	0	0.0691109	0	0.134592	0	0.051698	0	0	0.0570335
BnaA01g18730D	2.0978	1.99031	3.25771	3.13999	4.64869	4.85074	5.79259	4.73504	2.17413	2.36355	2.62901	4.48358	4.52024	5.63174	5.65814	2.88701	3.66083	3.83378	4.31464	4.25476	2.46883	2.39683
BnaA01g18740D	3.535	0	10.9895	2.53652	3.11453	2.91747	1.64052	0.447669	0.388018	0	0	0.922661	3.50421	29.406	4.52354	4.31446	0	3.78882	1.68665	0.249366	0.250892	1.00804
BnaA01g18750D	3.87537	2.54284	3.49372	5.11308	0	0	0	0.230509	5.08537	4.55581	3.60653	5.56367	8.78371	9.99379	6.01238	1.71474	0	0.14364	3.39963	3.99831	5.06819	4.44936
BnaA01g18760D	0	0	0	0.585725	0	1.1283	0.687953	0	0	0	0	0	0.382454	0	0	0	0.431076	0	0	0	0	0
BnaA01g18770D	3.63812	2.97276	4.05811	3.16541	9.72002	9.38022	7.13276	7.30126	2.20852	2.21571	2.89515	3.11345	10.5975	9.58789	8.79463	4.77245	7.32328	8.60012	1.24942	1.10558	0.872568	1.04577
BnaA01g18780D	0	0	0	0	0	0	0	0	0	0	0	0	0	0	0	0	0	0	0	0	0	0
BnaA01g18790D	0	0	0	0	0	0	0	0	0	0	2.55098	0	0	0	0	0	0	0	0	0	0	0
BnaA01g18800D	1.0126	1.33838	3.16029	1.279	0	0	0	0	0	0.396066	6.47042	2.58399	0.777177	3.96991	0	0	3.21296	3.83368	0	3.81	1.57558	1.82267
BnaA01g18810D	0	0	0	0	0	0	0	0	0	0	0	0	0	0	0	0	0	0	0	0	0	0
BnaA01g18820D	0	0	0	0	0	0	0	0	0	0	0	0	0	0	0	0	0	0	0	0	0	0
BnaA01g18830D	0	0	0	0	0	0	0	0	0	0	0	0	0	0	0	0	0	0	0	0	0	0
BnaA01g18840D	0.337716	0	0	0	0	0	0	0	0	0	0	0	0	0	0	0	0	0	0	0	0	0
BnaA01g18850D	0	0	0	0	0	0.318277	0	0	0	0	0	0	0	0	0	0	0	0	0	0	0	0
BnaA01g18860D	4.02699	6.94565	5.76382	6.10832	16.271	16.1229	13.3067	12.5691	0	0	0	0	11.8011	12.7044	10.3306	6.25716	11.1009	10.3995	0.261942	0.304103	0	0
BnaA01g18870D	114.943	171.031	126.945	79.2889	363.615	317.94	311.878	349.352	0	0	0	0	291.743	283.794	270.225	144.469	109.099	248.133	0	0	0	0
BnaA01g18880D	17.2232	17.5169	19.5283	25.7564	26.2789	26.8073	22.9268	20.1848	2.41673	3.49753	3.24235	2.6371	51.8126	52.0539	57.2131	32.272	80.1432	48.1222	0	0	0	0
BnaA01g18890D	17.3227	34.0997	41.3923	42.1049	134.994	115.278	62.2147	68.0569	8.73912	5.21656	0.430247	1.17371	41.3971	69.5208	61.8032	26.576	44.9887	59.9439	1.33065	1.86505	8.33147	10.4303
BnaA01g18900D	0.337274	0	0	0	0	0	0.558877	0.570637	0	0	0	0	0	0	0	0	0.372742	0	0	0	0	0
BnaA01g18910D	0	0	0	0	0	0	0	0	0	0	0	0	0	0	0	0	0	0	0	0	0	0
BnaA01g18920D	14.286	9.26929	21.5454	14.7785	58.4345	56.5329	44.6786	44.7247	1.03731	2.04114	1.58182	1.87586	67.8011	58.512	57.5687	39.6737	23.1587	64.1023	0.270049	0.62683	1.24069	2.08879
BnaA01g18930D	1.13932	0.531421	2.64507	2.05488	4.14768	4.18139	4.65096	5.73011	0	0.119898	0.0890394	0.0864563	4.82002	4.06315	3.79363	2.90774	2.77463	9.30675	0.197002	0.306274	0.381844	0.291545
BnaA01g18940D	3.63778	1.40674	3.01363	3.7406	8.94559	9.04477	6.98236	8.63277	0	0	0.31039	0.294689	6.42828	6.88121	8.61513	6.92255	18.5179	11.291	0.290877	0.112232	0	0
BnaA01g18950D	0	0.159553	0.16238	0.182057	0	0	0	0	0	0	0	0	0	0	0	0	0	0.816241	0	0	0	0
BnaA01g18960D	2.92374	0.7276	5.46079	3.64882	11.6376	11.5595	10.1679	10.1377	1.53977	0.804335	0.134313	1.29871	10.3338	15.727	10.7371	6.03602	2.72924	16.5866	0.308764	1.07808	0.656701	0.390681
BnaA01g18970D	0.473344	0.699506	0.484629	0.384631	1.25707	1.44193	0.774604	0.848861	0.0282722	0.0282054	0.101643	0.123084	1.33851	1.3007	1.13942	0.412703	2.01764	1.54322	0.0646472	0.0561894	0	0
BnaA01g18980D	0	0	0	0	0	0	0	0	0	0	0	0	0.353589	0	0	0	0	0	0	0	0	0
BnaA01g18990D	0.247475	0.0827243	0.248498	0.0933358	0	0	0	0	0	0	0	0	0	0	0	0	0	0.0840703	0.155493	0	0	0
BnaA01g19000D	0	0	0	0	0.270058	0	0	0	0.204923	0	0	0.147881	0	0	0	0	0	0	0	0.131112	0.259436	0.12429
BnaA01g19010D	12.6039	4.58322	2.76349	3.4494	3.65397	6.59899	3.78255	3.39644	0	0.416734	1.01972	0.320674	8.42642	4.32379	19.3267	7.92552	8.79318	20.2927	0	0.257274	0	0
BnaA01g19020D	2.07996	2.36265	5.82396	5.5253	9.61513	10.4278	7.74559	6.61207	2.62838	1.81795	1.78976	3.50037	11.0412	9.08613	11.8062	6.29571	8.57844	7.54424	4.35365	3.27525	2.36012	1.67436
BnaA01g19030D	0.50984	0	0.142487	0.157935	0	0	0	0	0	0	0	0	0	0	0	0	0.153407	0	0.613938	1.00062	0.422313	0.408581
BnaA01g19040D	0	0	0	0	0	0	0	0	0	0	0	0	0	0	0	0	0.362949	0	0.528682	0	0	0.297683
BnaA01g19050D	0	0	0	0	0	0	0	0	0	0	0	0	0	0.0454903	0	0	0	0	0	0	0	0
BnaA01g19060D	0	0	0	0	0	0	0	0	0	0	0	0	0	0	0	0	0	0	0	0	0	0
BnaA01g19070D	0	0	0	0	0	0	0	0	0	0	0	0	0	0	0	0	0	0	0	0	0	0
BnaA01g19080D	0.860324	0	1.10669	0	0	0	1.42131	0	0	2.66885	0	1.22287	1.54238	1.08259	0	0	0	0.837625	0	0	0	0
BnaA01g19090D	1.18904	1.59025	2.40165	1.44413	2.84663	4.36603	2.78764	3.21838	0.858119	0.275326	0	0	3.05258	1.09727	1.61532	1.48997	1.55061	1.55242	1.73997	1.03057	0.517407	0.493314
BnaA01g19100D	0	0.536107	5.3345	2.23086	0	0	0	0	0	0.392756	0.298667	0	0	0	0	0.271404	0.300008	9.10451	0.444375	0	0	0.250145
BnaA01g19110D	0	0	72.1088	43.1026	0	0	0	0.571851	12.2067	9.38382	2.16458	5.21914	0	60.489	0.788548	0	68.5103	37.8675	2.87703	0	22.9497	19.326
BnaA01g19120D	5.9629	4.77096	3.01851	1.41926	5.41565	6.12222	12.9312	7.31375	0	0	0	0	11.9962	2.8472	0.40098	1.63669	2.16474	1.40048	0	0	0	0
BnaA01g19130D	0.216581	0.311543	0.103055	0.119764	0.4333	0.223753	0	0	0	0	0	0	0	0	0.127529	0.109536	0	0.304833	0	0	0	0
BnaA01g19140D	0	0	0	0	0	0	0	0	0	0	0	0	0	0	0	0	0	0	0	0	0	0
BnaA01g19150D	7.37395	3.53935	5.06981	5.26171	14.7745	10.2227	20.1124	9.55153	0	0.482388	0	0	19.0385	15.3512	20.9702	13.5732	12.3611	12.0529	0	0	0	0
BnaA01g19160D	0.26647	0.904797	2.96659	2.57854	4.91011	8.1717	6.34414	5.00588	0	0.203026	0.199478	0	6.1742	4.86851	8.96216	3.54106	3.92098	4.2672	0	0.124995	0	0.116097
BnaA01g19170D	4.13148	3.31053	5.54317	3.21901	7.83139	6.86302	7.81275	8.18833	0	0	0	0	8.04642	12.8004	13.6397	7.70099	24.4909	20.2032	0	0	0	0
BnaA01g19180D	1.80942	1.64016	0.712109	0.476676	1.65544	0.608265	0.452186	0.233236	0	0	0	0	1.54138	1.94096	2.10641	0.815699	2.31675	1.17725	0	0	0	0
BnaA01g19190D	0.298189	0.305168	0.0757569	0	0.162194	0	0.120783	0	0	0	0	0	0	0.558532	0	0.0790324	0	0.220312	0	0	0	0.0725366
BnaA01g19200D	3.68257	1.90058	0.228469	0.338355	0.649589	0.163991	0.845483	0.125806	0	0	0	0	1.72559	1.11365	4.73876	1.89455	4.4994	0.807913	0	0	0	0
BnaA01g19210D	0.219148	0.216602	2.78696	3.64717	2.60639	2.99802	1.22266	1.41693	0	0.168526	0	0	1.84756	0	3.31195	0.773853	3.88286	1.67787	0	0	0	0
BnaA01g19220D	0	0	0	0	0	0	0	0	0	0	0	0	0	0	0	0	0	0	0	0	0	0
BnaA01g19230D	5.57052	5.5595	2.28274	3.13124	11.3829	11.7566	10.1078	9.69205	0.200805	0	0.0712325	0.0706358	10.0279	8.63338	11.9512	8.23996	11.4771	9.0299	0.105869	0	0.305987	0.117682
BnaA01g19240D	0	0	0	0	0	0	0	0	0	0	0	0	0	0	0	0	0	0	0	0	0	0
BnaA01g19250D	0	0.170779	0	0	0	0	0.280036	0	0	0	0	0	0	0.213285	0	0	0	0	0	0	0	0
BnaA01g19260D	14.8945	11.7708	13.8375	9.7196	57.5114	60.251	40.3729	42.3695	1.71714	2.21073	1.39419	3.16549	30.4547	46.9866	51.6974	34.0977	19.3638	56.5013	0	0.073461	0.0368226	0.100837
BnaA01g19270D	1.87631	1.24861	0.988285	0.797533	0.60242	0.902926	0.652412	0.900766	0	0	0.176566	0.338682	7.11299	11.436	7.00641	6.48254	0.613524	0.272844	1.60114	0.725412	0.434673	0
BnaA01g19280D	46.1012	38.2366	44.3199	39.2162	136.6	154.049	188.414	185.317	8.51718	10.5423	21.7119	12.177	147.746	185.045	190.525	106.217	70.663	158.699	1.10193	1.27065	2.51888	2.17795
BnaA01g19290D	0	0	0	0	0	0	0	0	0	0	0	0	0	0	0	0	0	0	0	0	0	0
BnaA01g19300D	6.77238	2.3888	16.2252	9.28939	22.4009	32.4112	26.1202	32.02	2.00963	1.13956	0.636227	1.23357	32.595	44.0108	43.7813	29.8769	18.7592	39.7225	0.0926261	0.107321	0.106356	0.100919
BnaA01g19310D	0	0	0	0	0	0	0	0	0	0	0	0.350341	0	0	0	0	0	0	0.50978	0.297132	0	0
BnaA01g19320D	0	0	0	0	0	0	0	0	0	0	0	0	0	0	0	0	0	0	0	0	0	0
BnaA01g19330D	6.06439	3.70583	4.7493	3.80572	6.31766	8.18538	7.25907	5.98964	0.756051	0.0909833	0.762108	0.608443	6.98322	9.50073	7.04768	4.63509	9.79504	8.01605	0	0	0.960084	1.38928
BnaA01g19340D	5.75924	5.47392	4.87107	2.67886	8.84966	6.55298	12.4372	8.50215	0	0.698455	0	0	6.97898	0.863499	2.03707	0.924811	9.69129	7.59466	0	0.233936	0	0.218895
BnaA01g19350D	68.263	60.997	49.5851	49.6228	50.8819	41.2245	167.154	143.644	1.6615	0.802498	0	0.764869	44.9188	5.18201	52.2026	23.6263	41.3516	35.787	0.411322	0.478976	4.5112	4.67527
BnaA01g19360D	0	0	0	0	0	0	0	0	0	0	0	0	0	0	0	0	0	0.648483	0	0.65665	0	0
BnaA01g19370D	0	0	0	0	0	0	0	0	0	0	0	0	0	0	0	0	0	0	0	0	0	0
BnaA01g19380D	2.60629	1.9216	2.59983	2.14897	3.58171	3.45287	2.51482	4.03474	0	0.246408	0	0	4.34864	4.514	4.40167	2.80075	5.00476	4.49977	0.0447323	0.309754	0.203201	0.247609
BnaA01g19390D	9.41302	9.90593	12.0634	11.7911	14.5819	14.9338	12.9046	13.3607	0	0	0.607399	0	13.6745	17.5813	15.008	9.88163	23.048	24.4807	0	0	2.50518	1.14327
BnaA01g19400D	35.077	52.3513	75.1151	71.2904	114.611	103.618	138.011	131.499	0	0	0	0	111.419	74.4645	95.6549	49.9091	168.692	137.503	0	0.402281	0	0.391509
BnaA01g19410D	7.07533	10.1264	11.612	7.79469	20.3367	19.3588	19.4228	18.8635	0	0	0	0	19.1074	17.3024	5.38619	7.17928	17.2149	0.808368	0	0	0.799765	2.42812
BnaA01g19420D	0	0	0	0	0	0	0	0	0	0	0	0	0	0	0	0	0	0	0	0	0	0
BnaA01g19430D	0	0	0	0	0	0	0	0	0	0	0	0	0	0	0	0	0	0	0	0	0	0
BnaA01g19440D	0	0	0	0	0	0	0	0	0	0	0	0	0.129915	0	0	0	0	0	0	0	0	0
BnaA01g19450D	3.37396	3.7486	6.926	2.80473	12.2426	10.8036	13.4436	12.2341	0.495155	0.831044	2.30332	0.536931	14.3534	14.1171	8.6331	5.31885	9.63952	7.77762	0	0	0.225814	0.431929
BnaA01g19460D	10.097	9.64118	0.376515	0.286024	2.75583	3.26146	1.80012	3.67173	0	0	0	0	1.56292	4.83726	3.57721	3.13232	11.8251	1.88487	0	0	0	0
BnaA01g19470D	0.393599	0	0.133824	0	1.16776	1.17472	1.07904	2.3984	0.426012	0.208781	0.560817	0.175925	0.408151	0	0	0.134091	0	0.130513	0	0	2.36513	1.51025
BnaA01g19480D	0	0.49768	0.503183	0.284464	0.576053	0.557841	0	0.733647	0	0	0.313733	0	0	0.539905	0.498938	0.435401	4.34931	0.421501	0	0	0	0.201887
BnaA01g19490D	6.16974	5.53533	6.39484	4.1217	9.23129	12.3654	7.92962	11.8886	2.22848	0	3.30376	1.10268	9.14722	10.4877	9.55426	4.61002	13.2376	5.54188	0	0	2.76068	0.98659
BnaA01g19500D	10.2328	8.61015	0.22936	0.259326	20.5931	19.3329	20.4036	20.0141	0	0.360574	0.489653	0.301366	27.3384	24.2854	29.2383	14.819	28.5627	14.4176	0	0	0	0
BnaA01g19510D	0.296571	0	0	0	0	0	0	0	0	0	0	0	0	0	0	0	0	0	0	0	0	0
BnaA01g19520D	0	0	0	0	0	0	0	0	0	0	0	0	0	0	0	0	0	0	0	0	0	0
BnaA01g19530D	0.433766	0.492975	2.2405	1.81236	0	1.12523	0.706565	2.16843	0	0	0	0	0	0	0	0	0	0	0	0	0.997773	1.99414
BnaA01g19540D	7.42358	4.96276	8.21272	6.45821	15.7976	17.0651	7.02676	8.89304	0.263729	0.38991	0.173507	0.3569	6.10276	13.0597	15.3022	9.37342	5.37491	9.19271	0	0	1.4436	1.86238
BnaA01g19550D	3.98683	2.37606	10.3127	5.83991	12.5724	14.1391	9.93668	6.51572	0	0	0	0	10.0601	7.73704	8.49942	6.92798	4.88853	3.20098	0	0	0.946869	2.55497
BnaA01g19560D	0	0	0.102663	0	0	0	0	0	0	0	0	0	0	0	0	0	0	0	0	0	0	0
BnaA01g19570D	0	0	0	0	0	0	0	0	0	0	0	0	0	0	0	0	0	0	0	0	0	0
BnaA01g19580D	0	0	0	0	0	0	0	0	0	0	0	0	0	0	0	0	0	0	0	0	3.30664	0
BnaA01g19590D	0	0	0	0	0	0	0	0	0	0	0	0	0.148494	0.378773	0.534187	0.155731	0	0	0.124455	0.145291	0.146863	0
BnaA01g19600D	0.405441	0.470749	0.5016	0.564368	0	0	0	2.11265	0	0	0	0	0.422539	0	0	0	1.87534	0.827357	0	0	0	0
BnaA01g19610D	0	0	0	0	0	0	0	15.7407	0	0	0	0	0	0	0	0	0	8.20198	0	0	0	0
BnaA01g19620D	0	0	0	0	0	0	0	0	0	0	0	0.0397222	0	0	0	0	0	0	0	0	0	0
BnaA01g19630D	0	0	0	0	0	0	0	0	0	0	0	0	0	0	0	0	0	0	0	0	0	0
BnaA01g19640D	3.39196	3.12631	0.808624	1.84191	3.61458	3.42524	6.69809	5.5931	0	0	0.224131	0.913635	0.956736	4.07495	3.38492	0.944387	4.78109	3.4348	1.18216	1.57985	1.91212	1.12025
BnaA01g19650D	9.37389	4.86878	9.29473	5.18221	8.99591	7.27555	9.29471	9.26938	1.41602	0.827607	0	0	9.73596	32.2077	16.883	18.5366	11.5972	30.6938	5.76969	9.82578	6.00746	5.83438
BnaA01g19660D	0	0	0	0	0	0	0	0	0	0	0	0	0	0	0	0	0	0	0	0	0	0
BnaA01g19670D	0	0	0	0	0	0	0	0	0	0	0	0	0	0	0	0	0	0	0	0	0	0
BnaA01g19680D	0	0.446236	1.15631	0.26092	0.525784	1.49757	0	0.747958	0.362641	0	0	0	0	0	0.253574	0.225878	0.247955	0.224199	0	0.64654	0.216894	0
BnaA01g19690D	0	0	0	0	0	0	0	0	0	0	0	0	0	0	0	0	0	0	0	0	0	0
BnaA01g19700D	2.08672	2.02181	1.05022	1.73973	3.42378	1.64001	3.47438	4.30437	0	0	0	0	8.14448	5.41657	5.29995	3.08842	6.52254	7.93682	0	0.255064	0	0.73182
BnaA01g19710D	5.21288	6.22909	2.96618	2.80395	6.22158	4.98635	1.94816	2.9767	1.98216	2.93751	10.121	4.20475	2.66133	4.86863	0	0	8.67097	0	7.13178	9.70231	1.67643	3.07033
BnaA01g19720D	0	0	0	0	0	0	0	0	0	0	0	0	0	0	0	0	0	0	0	0	0	0
BnaA01g19730D	0	0	0	0	0	0	0	0	0	0	0	0	0	0	0	0	0	0	0	0	0	0
BnaA01g19740D	0	0.292562	0.630707	0.357118	3.79828	2.73012	1.70698	1.78011	0	0	0	0	0.260428	0.634182	0.289556	0.49422	0.275535	0.242669	0	0	0	0
BnaA01g19750D	91.8659	149.907	81.0581	94.627	185.093	175.639	176.204	175.232	8.42159	13.1037	0.393514	1.19256	245.825	267.001	297.786	136.877	274.406	203.905	0	0.221569	0.110663	0.312504
BnaA01g19760D	0	0	0	0	0	0	0	0	0	0	0	0	0	0.217749	0	0	0	0	0	0	0	0
BnaA01g19770D	0	0	0	0	0	0	0	0	0	0	0	0	0	0	0	0	0	0	0	0	0	0
BnaA01g19780D	0	0	0	0	0	0	0	0	0	0	0	0	0	0	0	0	0	0	0	0	0	0
BnaA01g19790D	8.42471	11.5584	7.21176	8.83426	12.3672	14.6766	9.6025	9.55081	0.79773	1.38022	2.6852	2.78483	12.0146	12.1448	17.6961	9.83164	30.8211	17.5938	0	1.19755	0.0336264	0.0619779
BnaA01g19800D	0	0	0	0	0	0	0	0	0	0	0	0	0	0	0	0	0	0	0	0	0	0
BnaA01g19810D	1.29124	1.713	1.37914	1.81607	1.4454	1.57617	2.3328	1.9478	0	0	0	0	5.11376	2.46742	3.57511	1.69738	4.1043	3.69422	0.746039	1.31753	0.756771	1.05127
BnaA01g19820D	0	0	0	0	0	0	0	0	0	0	0	0	0	0	0	0	0	2.82999	0	0	0	0
BnaA01g19830D	0	0	0	0	0	0	0	0	0	0	0	0	0	0	0	0	0	0	0	0	0	0
BnaA01g19840D	0	0	0	0	0	0	0	0	0	0	0	0	0	0	0	0	0	0	0	0	0	0
BnaA01g19850D	0	0.264085	0	0	0.29854	0.289927	0.830302	0.423639	0.853532	0.41487	0	0	0	0.1668	0	0	0.445716	0.665389	0.113319	0	0	0
BnaA01g19860D	8.26356	4.97416	5.01699	5.96554	7.42021	7.49336	7.53584	5.11799	1.78569	2.18269	0	1.20078	3.97534	5.04076	5.89918	4.2011	3.70358	7.71993	0.741458	0	0	0
BnaA01g19870D	7.92251	6.1915	0.911014	1.02409	4.66943	4.04076	6.38917	8.68259	0.106046	0.313655	0.622555	0.330522	6.23476	4.32866	8.71494	4.89005	7.80778	6.76469	1.48689	1.12859	1.06587	0.687337
BnaA01g19880D	5.99274	4.85891	1.74374	2.79767	5.75716	2.41432	6.81673	7.1388	0	0	0	0	10.7128	11.8957	14.1018	7.15912	7.26041	9.72776	0	0	0.199452	0
BnaA01g19890D	0.284961	0.297818	0.101562	0.338269	0	0	0	0	0	0	0	0	0	0	0	0	0.454248	0.09912	0.351408	0.305215	0.49457	0.776123
BnaA01g19900D	0	0	0	0	0	0	0	0	0	0	0	0	0	0	0	0	0	0	0	0	0	0
BnaA01g19910D	0	0	0	0	0	0	0	0	0	0	0	0	0	0	0	0	0	0	0	0	0	0
BnaA01g19920D	0	0	0	0	0	0	0	0	0	0	0	0	0	0	0	0	0	0	0	0	0	0
BnaA01g19930D	0	0	0	0	0	0	0	0	0	0	0	0	0	0	0	0	0	0	0	0	0	0
BnaA01g19940D	0	0.0958477	0	0	0	0	0	0.155878	0	0	0	0	0	0	0	0	0	0	0	0	0.382442	0.0915651
BnaA01g19950D	0	0	0	0	0	0	0	0	0	0	0	0	0	0	0	0	0	0	0	0	0.134742	0.126701
BnaA01g19960D	0.113958	0.108653	0.108516	0.607292	0	0	0	0	0	0	0.35747	0.120993	0	0	0	0	0	0	0	0.236457	0	0
[truncated: 99,044 more rows]
