# Supplementary material for: Comparative Leaves Transcriptome Analysis Emphasizing on Accumulation of Anthocyanins in Brassica: Molecular Regulation and Potential Interaction with Photosynthesis
Source: Front Plant Sci. 2016 Mar 18;7:311. doi: 10.3389/fpls.2016.00311 (PMC4796009; doi:10.3389/fpls.2016.00311)
Supplement: Supplementary Data Sheet S2 — Expression value of each gene in anthocyanin biosynthesis pathway. [file DataSheet2.XLSX]

## Sheet: Sheet1
Datasheet S2: Expression value of genes in biosynthesis pathway of anthocyanin in different Brassica species
								Gene expression value (FPKM)
Gene name and symbol in different genomes								B. napus		B.juncea		B.carinata		B.rapa P1		B.rapa P2		B.oleracea
Sr.No.	At Name	At Gene	Br Name	B.rapa	B. oleracea	An subgenome	Cn subgenome	Purple	Green	Purple	Green	Green	Purple	Purple	Green	Purple	Green	Purple	Green
1	PAL1	AT2G37040	BrPAL1.1	Bra005221	Bol025522	BnaA05g07370D	BnaC04g08190D	26.0926	46.5377	15.0574	71.8362	113.656	26.0062	83.7724	41.6118	42.1558	40.9057	70.6995	27.8483
2	PAL1	AT2G37040	BrPAL1.2	Bra017210	Bol037689	BnaA04g21230D		46.5452	76.4719	296.965	210.571	137.281	24.0731	134.715	72.0942	93.8479	70.8402	47.6425	12.8747
3	PAL2	AT3G53260	BrPAL2.1	Bra006985	Bol025102	BnaA09g33560D	BnaC08g24360D	26.8985	26.1943	43.7148	28.359	39.6904	8.45422	54.7661	25.3977	55.2948	24.9323	36.4039	3.67055
4	PAL2	AT3G53260	BrPAL2.2	Bra039777	Bol041738	BnaA04g04830D	BnaCnng52250D	10.3853	17.2051	43.1034	20.8357	80.251	12.5639	34.0463	10.9421	25.035	10.7486	100.028	12.5452
5	PAL2	AT3G53260	BrPAL2.3	Bra003126	Bol005411	BnaA07g16060D	BnaC06g14510D	3.63008	15.1249	8.40787	2.86633	14.1146	0.218788	9.15236	0.468561	1.21337	0.459227	22.6619	6.41118
6	PAL3	AT5G04230	BrPAL3.1	Bra028793	Bol005493			0	0	0	0	0	0	0	0	0	0	0	0
7	PAL3	AT5G04230	BrPAL3.2	Bra030322	Bol006745	BnaA04g11940D	BnaC04g33780D	0	0	0	0	0	0	0	0	0	0	0	0
8	PAL4	AT3G10340	BrPAL4	Bra029831	Bol011375	BnaA05g28470D	BnaC05g42780D	77.5594	27.8749	38.936	20.4639	34.5457	5.44766	65.1273	5.06023	13.4247	4.96834	33.6053	8.33645
9	C4H	AT2G30490	BrC4H1	Bra018311	Bol006704	BnaA05g11950D	BnaC04g14330D	79.2569	53.6655	112.516	122.476	159.119	113.584	95.9333	38.671	71.1028	37.988	108.401	55.0518
10	C4H	AT2G30490	BrC4H2	Bra021636	Bol033347	BnaA04g17560D	BnaC04g41120D	2.76985	0.100437	0.387964	0.0923668	0	8.76385	0.635538	1.24852	1.31039	1.22417	3.41724	1.01907
11	C4H	AT2G30490	BrC4H3	Bra021637	Bol033349	BnaA04g17570D	BnaC04g41130D	25.799	72.6543	40.0925	30.6427	113.093	41.31	40.139	23.2315	25.0645	22.8453	105.043	38.6835
12	C4H	AT2G30490	BrC4H4	Bra022802	Bol004608	BnaA03g14000D	BnaC03g16950D	9.56816	1.15124	0.940108	4.5232	0.565898	0.879251	9.47074	6.16887	2.20253	6.07391	30.2368	1.71471
13	C4H	AT2G30490	BrC4H5	Bra022803	Bol004610	BnaA03g14010D	BnaC03g16960D	9.06287	18.623	173.556	31.9934	33.3204	8.01601	71.6722	21.4225	36.5095	21.0308	43.4895	8.22185
14	4CL1	AT1G51680	Br4CL1	Bra030429	Bol031583	BnaA05g15310D	BnaC06g08930D	19.1782	41.7619	54.2389	30.4871	66.4246	10.6871	72.7947	31.7686	45.2533	31.2227	45.8468	27.9101
15	4CL2	AT3G21240	Br4CL2.1	Bra031262	Bol038386	BnaA05g19790D	BnaC05g30770D	0.0587627	0.166762	0	0	0	0.068653	0	0	0	0	0.109789	0
16	4CL2	AT3G21240	Br4CL2.2	Bra031263	Bol038387	BnaA05g36600D		2.77292	0.134027	0	4.33783	0.103639	0	11.5296	2.99972	5.38077	2.94053	0	0
17	4CL2	AT3G21240	Br4CL2.3	Bra031265	Bol038389	BnaA05g19780D	BnaC05g30990D	8.79079	1.4381	0.11481	0.968179	1.62696	1.03708	1.77721	0.140674	0.498879	0.137743	71.0223	4.8768
18	4CL2	AT3G21240	Br4CL2.4	Bra031266	Bol038385	BnaA05g19760D	BnaC05g30950D	5.90939	4.52345	5.10863	8.80817	0.231664	0	19.8448	15.5768	14.3031	15.29	7.16452	3.74054
19	4CL3	AT1G65060	Br4CL3	Bra004109	Bol012584	BnaA07g25210D	BnaC06g26980D	39.0201	59.0815	41.4948	68.6785	80.5307	21.5797	62.3104	84.1695	48.3014	82.658	42.6797	26.1403
20	4CL5	AT3G21230	Br4CL5.1	Bra001819	Bol026622	BnaA03g36130D	BnaC03g42000D	1.78565	1.45654	0.679378	0.182677	1.02772	1.24539	2.0694	1.2477	1.24399	1.227	16.0773	3.45962
21	4CL5	AT3G21230	Br4CL5.2	Bra001820	Bol003620	BnaA03g36140D		0	0.773262	6.92688	5.94085	0	0	3.97954	9.59883	6.72708	9.42618	0	0
22	CHS	AT5G13930	BrCHS1	Bra008792	Bol043396	BnaA10g19670D	BnaC09g43250D	150.112	471.397	250.142	529.732	282.457	38.0087	283.048	220.89	238.185	216.815	313.769	95.7653
23	CHS	AT5G13930	BrCHS2	Bra006224	Bol034259	BnaA03g04590D	BnaC03g06120D	72.4701	123.615	196.85	232.693	582.057	44.1852	196.607	92.613	141.183	91.0555	396.617	79.4944
24	CHS	AT5G13930	BrCHS3	Bra023441	Bol004244		BnaC02g05070D	99.0715	208.36	40.6194	96.1741	572.059	63.5957	162.519	254.829	183.198	250.104	291.48	118.112
25	CHS	AT5G13930	BrCHS4	Bra036307			BnaCnng01290D	0.0850098	0.104974	0	0.142303	3.36498	2.00999	0	0.416899	14.4127	0.41079	10.5975	5.00976
26	CHS	AT5G13930	BrCHS5	Bra020688		BnaA02g30320D	BnaC02g38730D	0	0	0	0	0	0	0	0	0	0	0	0
27	CHI	AT3G55120	BrCHI1	Bra007142	Bol044343	BnaA09g34840D	BnaC08g26010D	98.8405	155.694	0.694968	157.27	36.7725	22.4715	176.717	116.463	109.107	114.457	318.63	68.3134
28	CHI	AT3G55120	BrCHI2	Bra003209	Bol008652	BnaA07g37900D	BnaCnng45660D	51.7697	86.5291	124.011	137.654	25.9859	30.9029	174.506	144.638	116.355	142.068	63.8641	27.3257
29	CHI	AT3G55120	BrCHI3	Bra017728	Bol018696	BnaAnng08210D	BnaC07g45760D	0	0	0	0	0	0	0	0	0	0	0	0
30	F3H	AT3G51240	BrF3H1	Bra036828	Bol010585	BnaA09g31780D	BnaC08g22640D	222.242	269.233	275.39	224.101	857.615	183.21	266.621	220.615	235.721	216.704	507.937	109.509
31	F3H	AT3G51240	BrF3H2	Bra029996	Bol030864	BnaA01g21160D	BnaC01g26570D	0	0	0	0	0	0	0	0	0	0	0	0
32	F3H	AT3G51240	BrF3H3	Bra012862	Bol002277	BnaA03g41250D	BnaC07g32140D	0	0.848054	1.60145	5.49592	6.76296	0.412094	3.31133	0.952205	1.87283	0.935484	0.180039	0
33	F3'H	AT5G07990	BrF3'H	Bra009312	Bol043829	BnaA10g23330D	BnaC09g47980D	12.0246	33.6854	155.311	112.084	271.395	19.7746	159.864	90.6498	71.1557	88.9968	138.027	3.82729
34	FLS1	AT5G08640	BrFLS1	Bra009358	Bol043773	BnaA10g22800D	BnaC09g47360D	88.1815	114.073	100.296	452.899	233.343	117.416	127.968	176.063	43.381	173.217	24.1192	25.3939
35	FLS2	AT5G63580	BrFLS2	Bra038647	Bol019127	BnaA06g22730D	BnaCnng61390D	8.569	2.1374	0.268813	0	6.63326	7.99947	0.119254	0	0	0	57.5422	25.5204
36	FLS3	AT5G63590	BrFLS3.1	Bra038648	Bol019361	BnaA06g22750D	BnaC03g50740D	0.296133	0.522838	8.31679	0.358461	0	0	0.441591	0.133867	0.582139	0.131084	1.40088	0.13356
37	FLS4	AT5G63595	BrFLS3.2	Bra029211	Bol020739	BnaA02g33800D	BnaC02g42590D	0	0.200099	0	0.289066	0.400666	0.250619	0.500549	0.457198	0.659588	0.449124	20.4739	0
38	FLS5	AT5G63600	BrFLS3.3	Bra029212	Bol020738	BnaA02g33780D	BnaC02g42580D	21.4945	90.3237	27.9315	17.6587	145.551	116.875	15.4308	35.0862	8.52143	34.3842	323.787	148.665
39	FLS5	AT5G63600	BrFLS4	Bra037747	Bol019125		BnaC09g05990D	0	0.321523	10.7631	5.18074	5.86054	0.969463	0.13132	0	0	0	0.100516	4.38099
40	FLS6	AT5G43935	BrFLS6					0	0	0	0	0	0	0	0	0	0	0	0
41	DFR	AT5G42800	BrDFR	Bra027457	Bol035269	BnaA09g15710D	BnaC09g17150D	61.316	21.2033	1070.92	27.1711	831.199	25.7034	274.177	3.79984	166.095	3.72396	616.222	12.4842
42	ANS (LDOX)	AT4G22880	BrANS1	Bra013652	Bol014986	BnaA01g12530D	BnaC01g14310D	42.2742	13.7197	430.161	21.7479	751.448	37.7635	278.967	4.96407	90.9095	4.87279	473.335	15.4851
43	ANS (LDOX)	AT4G22880	BrANS2	Bra019350	Bol042059	BnaA03g45610D	BnaC07g37670D	6.31505	1.93576	112.435	4.73246	204.351	23.3449	32.1537	5.10636	18.0017	5.00184	206.906	2.33595
44	UGT79B1	AT5G54060	BrUGT79B1.1	Bra003021	Bol038805	BnaA10g07160D	BnaC09g30320D	11.164	3.79878	132.97	4.49076	88.9099	4.46211	177.307	1.24789	23.7232	1.22304	1.13	2.94594
45	UGT79B1	AT5G54060	BrUGT79B1.2	Bra035004				0	0	0	0	0	0	0	0	0	0	0	0
46	UGT75C1	AT4G14090	BrUGT75C1	Bra038445	Bol027055	BnaA08g07620D	BnaC08g08350D	33.9873	19.797	775.127	24.908	438.281	2.81571	279.545	3.78252	88.2954	3.70971	200.059	8.27861
47	UGT78D2	AT5G17050	BrUGT78D2	Bra023594	Bol021317	BnaA02g03370D	BnaC02g06990D	17.5349	67.0912	131.079	35.8932	567.337	107.203	59.8552	25.5526	43.1239	25.1005	181.82	35.8329
48	MYB11	AT3G62610						0	0	0	0	0	0	0	0	0	0	0	0
49	MYB12	AT2G47460	BrMYB12.1	Bra004456	Bol001533	BnaA05g00510D	BnaC04g52010D	19.0842	17.3704	5.90113	16.1482	10.656	2.04917	3.9315	12.3837	3.77704	12.1769	3.43097	4.87452
50	MYB12	AT2G47460	BrMYB12.2	Bra000453	Bol029626	BnaA03g21790D	BnaC03g26060D	2.59514	6.84459	4.41172	2.83556	11.2177	7.40496	3.21195	7.88261	4.39477	7.74917	5.41878	3.05626
51	MYB111	AT5G49330	BrMYB111.1	Bra037419	Bol016599	BnaA06g29540D	BnaC07g27140D	44.2488	21.2492	38.2941	41.2581	60.3539	165.857	20.5277	39.9648	29.3452	39.2377	22.4068	21.479
52	MYB111	AT5G49330	BrMYB111.2	Bra020647	Bol033054	BnaA02g30720D	BnaC02g39010D	0	0.201128	0	0	0.372767	0.584585	0	0	0	0	0	0
53	MYB111	AT5G49330	BrMYB111.3	Bra036145	Bol032351	BnaA09g03290D	BnaC09g02660D	4.68443	23.1615	2.04064	1.2409	8.7124	8.6478	1.08584	3.79804	5.04871	3.72486	0.319185	0.523756
54	PAP1(MYB75)	AT1G56650	-	Bra039763	Bol045347	BnaA02g35530D	BnaCnng28030D	37.5028	66.0801	0.645351	0.211215	40.6791	103.218	0.413343	1.23717	0.133269	1.21228	22.3476	66.541
55	PAP1(MYB75)	AT1G56650	-	Bra001917	Bol042409	BnaC03g74080D		0	0	0	0	0	0	0	0	0	0	0	0
56	PAP1(MYB75)	AT1G56650	-	Bra004162	Bol012528	BnaA07g25800D	BnaCnng17820D	43.104	3.14894	4.5088	8.28451	14.6288	3.69395	4.90583	0.154929	6.0783	0.152658	63.8404	1.23359
57	PAP2(MYB90)	AT1G66390	-	Bra004162	Bol012528	BnaA07g25800D	BnaCnng17820D	43.104	3.14894	4.5088	8.28451	14.6288	3.69395	4.90583	0.154929	6.0783	0.152658	63.8404	1.23359
58	PAP2(MYB90)	AT1G66390	-	Bra001917	Bol042409			0	0	0	0	0	0	0	0	0	0	0	0
59	PAP2(MYB90)	AT1G66390	-	Bra039763	Bol045347	BnaA02g35530D	BnaCnng28030D	37.5028	66.0801	0.645351	0.211215	40.6791	103.218	0.413343	1.23717	0.133269	1.21228	22.3476	66.541
60	MYB113	AT1G66370	-	Bra039763	Bol045347	BnaA02g35530D	BnaCnng28030D	37.5028	66.0801	0.645351	0.211215	40.6791	103.218	0.413343	1.23717	0.133269	1.21228	22.3476	66.541
61	MYB113	AT1G66370	-	Bra004162	Bol012528	BnaA07g25800D	BnaCnng17820D	43.104	3.14894	4.5088	8.28451	14.6288	3.69395	4.90583	0.154929	6.0783	0.152658	63.8404	1.23359
62	MYB114	AT1G66380	-	Bra039763	Bol045347	BnaA02g35530D	BnaCnng28030D	37.5028	66.0801	0.645351	0.211215	40.6791	103.218	0.413343	1.23717	0.133269	1.21228	22.3476	66.541
63	MYB114	AT1G66380	-	Bra004162	Bol012528	BnaA07g25800D	BnaCnng17820D	43.104	3.14894	4.5088	8.28451	14.6288	3.69395	4.90583	0.154929	6.0783	0.152658	63.8404	1.23359
64	TT8	AT4G09820	BrTT8	Bra037887	Bol004077	BnaA09g22810D	BnaC09g24870D	1.25568	0.414451	55.8496	0.920025	32.0449	5.18701	35.811	0.18584	5.46706	0.182364	50.8962	0.814905
65	GL3	AT5G41315	BrGL3	Bra025508	Bol014556	BnaA04g11060D	BnaCnng33960D	1.43111	1.84576	1.8426	2.91588	1.65457	3.73929	4.43287	2.73519	2.84362	2.68692	8.25367	3.87351
66	EGL3	AT1G63650	BrEGL3.1	Bra027796	Bol022614	BnaA09g12420D	BnaC09g12820D	1.96168	9.04154	6.25326	4.28578	33.1769	15.0989	3.23793	3.72255	1.42298	3.65486	19.3813	13.285
67	EGL3	AT1G63650	BrEGL3.2	Bra027653	Bol029662	BnaA09g11090D	BnaC09g11380D	5.37539	3.16558	2.1121	1.85336	0.175856	0.251733	1.4241	1.11997	1.63377	1.10069	4.75635	2.27746
68	TTG1	AT5G24520	BrTTG1.1	Bra009770	Bol022420		BnaC07g29950D	7.60998	9.17997	0.446745	11.9473	22.4262	1.13635	2.81368	0.220192	3.28427	0.215622	46.9685	36.4308
69	TTG1	AT5G24520	BrTTG1.2	Bra029411	Bol022420	BnaA02g32510D	BnaC02g41250D	0	0	0	0	0	0	0	0	0	0	0	0
70	MYBL2	AT1G71030	BrMYBL2.1	Bra016164	Bol016164	BnaA07g29070D	BnaC06g32180D	8.83835	2.73418	52.1734	1.22597	36.5878	0.933701	40.0131	0.672868	24.4287	0.660141	0	50.3723
71	MYBL2	AT1G71030	BrMYBL2.2	Bra007957	Bol034966	BnaA02g15320D		128.902	142.679	4.61762	64.5064	71.8033	130.236	3.28736	2.17993	3.78094	2.13834	41.1235	69.1247
72	CPC	AT2G46410	BrCPC1	Bra004539	Bol000928	BnaA05g01400D	BnaC04g01230D	1.54192	2.32826	12.3083	6.8962	1.73073	1.19797	0	0	2.08661	0	11.7366	0
73	CPC	AT2G46410	BrCPC2	Bra039283	Bol021780	BnaA04g29720D	BnaC04g50810D	0.746694	2.32826	2.92246	0	3.09319	0	4.58442	0	1.32951	0	22.1961	1.03583
74	LBD37	AT5G67420	BrLBD37.1	Bra012164	Bol014304	BnaA07g37360D	BnaCnng56620D	20.8597	7.63667	9.40531	4.79557	7.91727	6.18942	17.7995	10.4051	20.2771	10.2319	12.2572	22.7562
75	LBD37	AT5G67420	BrLBD37.2	Bra031833	Bol008082	BnaAnng05130D	BnaC02g16720D	11.3755	13.7709	1.42039	0.612981	1.31717	0	1.06468	0.809145	3.50775	0.795702	0.490136	3.61785
76	LBD37	AT5G67420	BrLBD37.3	Bra037847	Bol005707		BnaC09g06760D	0	0	0	0	0	0	0	0	0	0	2.77278	0
77	LBD38	AT3G49940	BrLBD38.1	Bra036040	Bol007980		BnaC08g21490D	0.208356	0	0.513507	0	1.3282	0	0.999323	0.545126	0.227936	0.537137	1.97241	2.76421
78	LBD38	AT3G49940	BrLBD38.2	Bra012913	Bol016975	BnaA03g40660D	BnaC07g31610D	1.13642	0.911871	4.86136	0.533082	0.278487	0	1.29319	1.71256	1.12222	1.68479	4.68873	2.30021
79	LBD39	AT4G37540	BrLBD39.1	Bra011772		BnaA01g00400D	BnaC01g01380D	0.41692	0.4248	5.00805	2.99059	0.339854	0	1.45882	0	1.69035	0	2.01196	5.15833
80	LBD39	AT4G37540	BrLBD39.2	Bra017831		BnaA03g54090D	BnaC07g46580D	0.417837	0.232708	0.358229	0.840716	0.874449	0	0.19127	0	0.443824	0	0.478516	4.37699
81	TT19	AT5G17220	BrTT19.1	Bra008570	Bol019821	BnaA10g17440D	BnaC09g40740D	25.4462	2.65335	595.903	14.8454	806.403	14.4035	231.104	2.78021	47.1574	2.72691	570.523	11.3794
82	TT19	AT5G17220	BrTT19.2	Bra023602	Bol021325	BnaA02g03440D	BnaC02g07110D	69.9761	35.2995	456.107	78.2523	38.4299	4.55565	255.178	32.8343	104.746	32.2297	30.3517	0.849982
