# Supplementary material for: Comparative Leaves Transcriptome Analysis Emphasizing on Accumulation of Anthocyanins in Brassica: Molecular Regulation and Potential Interaction with Photosynthesis
Source: Front Plant Sci. 2016 Mar 18;7:311. doi: 10.3389/fpls.2016.00311 (PMC4796009; doi:10.3389/fpls.2016.00311)
Supplement: Supplementary Data Sheet S3 — Total expression value and fold changes between green and purple leaves of genes in biosynthesis pathway of anthocyanin. [file DataSheet3.XLSX]

## Sheet: Sheet2(Yes)
Datasheet S3: Total expression value and fold changes between green and purple leaves of genes in biosynthesis pathway of anthocyanin
Gene Name	BnaP	BnaG	Fold changes(BnaP/G)	Log2(fold change)	BjuP	BjuG	Fold changes (BjuP/G)	Log2(fold change)	BcaP	BcaG	Fold changes (BcaP/G)	Log2(fold change)	BraP1	BraG	Fold changes (BraP1/G1)	Log2(fold change)	BraP2	BraG2	Fold changes (BraP2/G2)	Log2(fold change)	BolP	BolG	Fold changes (BolP/G)	Log2(fold change)
PAL1	72.6378	123.01	0.590505	-0.759978	312.022	282.407	1.10487	0.143873	250.937	50.0793	5.0108	2.32504	218.487	113.706	1.92151	0.942242	136.004	111.746	1.21708	0.283424	118.342	40.723	2.90602	1.53905
PAL2	40.9138	58.5243	0.699092	-0.516446	95.226	52.061	1.82912	0.871153	134.056	21.2369	6.31241	2.65819	97.9648	36.8084	2.66148	1.41223	81.5432	36.1402	2.2563	1.17396	159.094	22.6269	7.03117	2.81377
PAL4	77.5594	27.8749	2.78241	1.47634	38.936	20.4639	1.90267	0.928026	34.5457	5.44766	6.34139	2.6648	65.1273	5.06023	12.8704	3.68599	13.4247	4.96834	2.70204	1.43405	33.6053	8.33645	4.03113	2.01118
C4H	126.457	146.195	0.86499	-0.209245	327.493	189.728	1.72612	0.787531	306.098	172.553	1.77393	0.826953	217.851	90.7423	2.40076	1.26349	136.19	89.1622	1.52744	0.611114	290.587	104.691	2.77566	1.47283
4CL2	36.71	48.0242	0.764407	-0.387588	59.4624	44.6013	1.3332	0.414892	68.3869	11.7929	5.799	2.5358	105.946	50.4858	2.09854	1.06938	65.4361	49.591	1.31951	0.400007	124.143	36.5275	3.39863	1.76495
4CL3	39.0201	59.0815	0.660445	-0.598489	41.4948	68.6785	0.604189	-0.726928	80.5307	21.5797	3.73177	1.89986	62.3104	84.1695	0.740297	-0.433823	48.3014	82.658	0.584352	-0.77509	42.6797	26.1403	1.63272	0.707275
4CL5	1.78565	1.45654	1.22595	0.293903	0.679378	0.182677	3.71901	1.89492	1.02772	1.24539	0.825213	-0.277162	2.0694	1.2477	1.65857	0.729943	1.24399	1.227	1.01385	0.0198373	16.0773	3.45962	4.64713	2.21634
CHS	321.739	803.477	0.400433	-1.32037	487.612	858.742	0.567822	-0.816491	1439.94	147.8	9.7425	3.28429	642.174	568.749	1.1291	0.175171	576.979	558.385	1.0333	0.0472571	1012.46	298.381	3.39318	1.76264
CHI	150.61	242.223	0.621783	-0.685517	124.706	294.924	0.422842	-1.24181	62.7584	53.3744	1.17581	0.233659	351.223	261.101	1.34516	0.427777	225.463	256.525	0.87891	-0.186213	382.494	95.6392	3.99935	1.99976
F3H	222.242	270.081	0.822873	-0.281259	276.991	229.597	1.20642	0.270736	864.378	183.622	4.70738	2.23492	269.932	221.567	1.21829	0.284853	237.593	217.639	1.09168	0.126555	508.117	109.509	4.63997	2.21412
F3'H	12.0246	33.6854	0.356968	-1.48613	155.311	112.084	1.38566	0.470574	271.395	19.7746	13.7244	3.77867	159.864	90.6498	1.76354	0.81847	71.1557	88.9968	0.799531	-0.322774	138.027	3.82729	36.0639	5.17248
FLS1	88.1815	114.073	0.773028	-0.371408	100.296	452.899	0.221454	-2.17492	233.343	117.416	1.98732	0.990824	127.968	176.063	0.726832	-0.460305	43.381	173.217	0.250443	-1.99745	24.1192	25.3939	0.949803	-0.0742994
FLS2	8.569	2.1374	4.00907	2.00327	0.268813	0	IF	#VALUE!	6.63326	7.99947	0.829212	-0.270186	0.119254	0	IF	#VALUE!	0	0	IF	#VALUE!	57.5422	25.5204	2.25476	1.17297
FLS3	0.296133	0.522838	0.566395	-0.820119	8.31679	0.358461	23.2014	4.53614	0	0	IF	#VALUE!	0.441591	0.133867	3.29873	1.72191	0.582139	0.131084	4.44096	2.15087	1.40088	0.13356	10.4888	3.39078
FLS4	0	0.200099	IF	#VALUE!	0	0.289066	IF	#VALUE!	0.400666	0.250619	1.59871	0.676904	0.500549	0.457198	1.09482	0.130692	0.659588	0.449124	1.46861	0.554451	20.4739	0	IF	#VALUE!
FLS5	21.4945	90.6452	0.237128	-2.07626	38.6946	22.8394	1.69421	0.76061	151.411	117.844	1.28484	0.361592	15.5621	35.0862	0.44354	-1.17287	8.52143	34.3842	0.24783	-2.01258	323.888	153.046	2.11628	1.08153
DFR	61.316	21.2033	2.89182	1.53198	1070.92	27.1711	39.4138	5.30063	831.199	25.7034	32.3381	5.01516	274.177	3.79984	72.1549	6.17302	166.095	3.72396	44.6016	5.47903	616.222	12.4842	49.3603	5.62528
ANS (LDOX)	48.5892	15.6555	3.10366	1.63397	542.596	26.4803	20.4905	4.35689	955.799	61.1084	15.641	3.96726	311.121	10.0704	30.8945	4.94928	108.911	9.87463	11.0294	3.46328	680.241	17.821	38.1707	5.25439
UGT79B1	11.164	3.79878	2.93883	1.55524	132.97	4.49076	29.6097	4.888	88.9099	4.46211	19.9255	4.31655	177.307	1.24789	142.085	7.15061	23.7232	1.22304	19.3969	4.27776	1.13	2.94594	0.383579	-1.38241
UGT75C1	33.9873	19.797	1.71679	0.779713	775.127	24.908	31.1195	4.95975	438.281	2.81571	155.656	7.28222	279.545	3.78252	73.9045	6.20759	88.2954	3.70971	23.8012	4.57296	200.059	8.27861	24.1657	4.59489
UGT78D2	17.5349	67.0912	0.261359	-1.93589	131.079	35.8932	3.6519	1.86865	567.337	107.203	5.29217	2.40386	59.8552	25.5526	2.34243	1.22801	43.1239	25.1005	1.71805	0.780773	181.82	35.8329	5.07412	2.34316
TT19	95.4223	37.9528	2.51423	1.33012	1052.01	93.0977	11.3001	3.49826	844.833	18.9592	44.5607	5.4777	486.282	35.6145	13.654	3.77126	151.903	34.9566	4.34548	2.11952	600.875	12.2294	49.1337	5.61864
MYB12	21.6794	24.215	0.895288	-0.159577	10.3128	18.9838	0.543246	-0.880323	21.8737	9.45413	2.31367	1.21018	7.14345	20.2663	0.352479	-1.50439	8.17181	19.9261	0.410106	-1.28593	8.84975	7.93078	1.11587	0.158175
MYB111	48.9332	44.6118	1.09687	0.133387	40.3347	42.499	0.949075	-0.0754053	69.439	175.089	0.396593	-1.33427	21.6135	43.7628	0.493879	-1.01777	34.3939	42.9625	0.800555	-0.320927	22.726	22.0028	1.03287	0.0466554
PAP1*	80.6068	69.2291	1.16435	0.219523	5.15415	8.49572	0.606676	-0.721002	55.3079	106.912	0.517323	-0.950863	5.31917	1.39209	3.82099	1.93395	6.21157	1.36494	4.55079	2.18612	86.188	67.7746	1.27169	0.346743
TT8	1.25568	0.414451	3.02975	1.5992	55.8496	0.920025	60.7044	5.92373	32.0449	5.18701	6.17791	2.62712	35.811	0.18584	192.697	7.59019	5.46706	0.182364	29.9789	4.90587	50.8962	0.814905	62.4566	5.96478
GL3	1.43111	1.84576	0.775352	-0.367077	1.8426	2.91588	0.631919	-0.662188	1.65457	3.73929	0.442482	-1.17631	4.43287	2.73519	1.62068	0.6966	2.84362	2.68692	1.05832	0.0817763	8.25367	3.87351	2.1308	1.0914
EGL3	7.33708	12.2071	0.601049	-0.734446	8.36535	6.13914	1.36263	0.44639	33.3528	15.3507	2.17272	1.1195	4.66203	4.84252	0.962729	-0.0547988	3.05675	4.75555	0.642776	-0.637613	24.1377	15.5625	1.55102	0.633218
TTG1	7.60998	9.17997	0.828977	-0.270597	0.446745	11.9473	0.037393	-4.74109	22.4262	1.13635	19.7353	4.30271	2.81368	0.220192	12.7783	3.67562	3.28427	0.215622	15.2316	3.929	46.9685	36.4308	1.28925	0.366535
MYBL2	137.74	145.413	0.947234	-0.0782068	56.791	65.7324	0.863973	-0.210941	108.391	131.17	0.826342	-0.275188	43.3005	2.8528	15.1783	3.92393	28.2096	2.79848	10.0803	3.33347	41.1235	119.497	0.344138	-1.53894
CPC	2.28861	4.65652	0.491486	-1.02478	15.2308	6.8962	2.20857	1.14311	4.82392	1.19797	4.02675	2.00961	4.58442	0	IF	#VALUE!	3.41612	0	IF	#VALUE!	33.9327	1.03583	32.7589	5.03382
LBD37	32.2352	21.4076	1.50578	0.590516	10.8257	5.40855	2.00159	1.00115	9.23445	6.18942	1.49197	0.577221	18.8642	11.2143	1.68216	0.750317	23.7848	11.0276	2.15685	1.10892	15.5201	26.374	0.588461	-0.764982
LBD38	1.34478	0.911871	1.47474	0.560464	5.37487	0.533082	10.0826	3.3338	1.60669	0	IF	#VALUE!	2.29251	2.25769	1.01543	0.0220851	1.35016	2.22193	0.607651	-0.718685	6.66114	5.06442	1.31528	0.395372
LBD39	0.834757	0.657508	1.26958	0.344348	5.36628	3.83131	1.40064	0.486086	1.2143	0	IF	#VALUE!	1.65009	0	IF	#VALUE!	2.13417	0	IF	#VALUE!	2.49048	9.53532	0.261184	-1.93686
Note: Yellow cells means the gene was silenced in one type of leaves
