# Supplementary material for: Comparative Leaves Transcriptome Analysis Emphasizing on Accumulation of Anthocyanins in Brassica: Molecular Regulation and Potential Interaction with Photosynthesis
Source: Front Plant Sci. 2016 Mar 18;7:311. doi: 10.3389/fpls.2016.00311 (PMC4796009; doi:10.3389/fpls.2016.00311)
Supplement: Supplementary Data Sheet S4 — Analysis of differentially expressed genes between green and purple leaves. [file DataSheet4.XLSX]

## Sheet: B. oleracea(P&G)
Gene_id	Locus	Sample_1	Sample_2	Status	Value_1	Value_2	Log2(fold_change)	Test_stat	P_value	Q_value	Significant
BnaA01g00010D	chrA01:1069-1345	Purple	Green	OK	141.142	0	#NAME?	#NAME?	5e-05	0.000600056	yes
BnaA01g00170D	chrA01:61637-64383	Purple	Green	OK	32.4485	200.703	2.62884	4.57948	5e-05	0.000600056	yes
BnaA01g00460D	chrA01:254251-257623	Purple	Green	OK	0.660189	9.11855	3.78785	3.9112	0.0003	0.00287919	yes
BnaA01g00590D	chrA01:326860-329668	Purple	Green	OK	3.27274	9.17735	1.48758	1.94673	0.0097	0.0480058	yes
BnaA01g00670D	chrA01:360377-361364	Purple	Green	OK	2.15179	0	#NAME?	#NAME?	5e-05	0.000600056	yes
BnaA01g00860D	chrA01:488706-489954	Purple	Green	OK	4.31634	22.5919	2.38792	3.07805	0.00055	0.00481964	yes
BnaA01g01000D	chrA01:554006-556307	Purple	Green	OK	1.25271	5.2671	2.07196	2.28243	0.007	0.0372671	yes
BnaA01g01020D	chrA01:560331-561444	Purple	Green	OK	0	21.0935	inf	#NAME?	5e-05	0.000600056	yes
BnaA01g01310D	chrA01:681637-684864	Purple	Green	OK	4.98526	19.6597	1.9795	3.52598	5e-05	0.000600056	yes
BnaA01g02640D	chrA01:1316342-1318982	Purple	Green	OK	7.18642	0	#NAME?	#NAME?	5e-05	0.000600056	yes
BnaA01g02650D	chrA01:1320296-1323329	Purple	Green	OK	5.50384	0	#NAME?	#NAME?	5e-05	0.000600056	yes
BnaA01g02670D	chrA01:1326894-1331503	Purple	Green	OK	8.81153	0	#NAME?	#NAME?	5e-05	0.000600056	yes
BnaA01g02930D	chrA01:1431693-1434256	Purple	Green	OK	4.60308	1.20196	-1.93721	-2.39026	0.00335	0.0207586	yes
BnaA01g03230D	chrA01:1553955-1557351	Purple	Green	OK	2.183	6.31043	1.53142	2.26878	0.00345	0.0212673	yes
BnaA01g03300D	chrA01:1576843-1577095	Purple	Green	OK	0	6.01731	inf	#NAME?	0.00525	0.0296335	yes
BnaA01g03360D	chrA01:1594949-1597409	Purple	Green	OK	1.71353	0	#NAME?	#NAME?	5e-05	0.000600056	yes
BnaA01g03800D	chrA01:1760625-1764919	Purple	Green	OK	3.34397	12.1289	1.85881	2.65545	0.00395	0.0237155	yes
BnaA01g03840D	chrA01:1779008-1781458	Purple	Green	OK	0	6.41064	inf	#NAME?	5e-05	0.000600056	yes
BnaA01g03860D	chrA01:1786510-1790791	Purple	Green	OK	47.9257	0.328518	-7.18868	-7.27859	0.00065	0.00553406	yes
BnaA01g04010D	chrA01:1838858-1840340	Purple	Green	OK	2.89595	0	#NAME?	#NAME?	5e-05	0.000600056	yes
BnaA01g04400D	chrA01:2037039-2043126	Purple	Green	OK	0	2.90706	inf	#NAME?	5e-05	0.000600056	yes
BnaA01g04420D	chrA01:2062420-2063975	Purple	Green	OK	2.70937	0	#NAME?	#NAME?	5e-05	0.000600056	yes
BnaA01g04510D	chrA01:2105953-2107121	Purple	Green	OK	0	11.4969	inf	#NAME?	5e-05	0.000600056	yes
BnaA01g04520D	chrA01:2108135-2114406	Purple	Green	OK	0.336647	2.137	2.66628	2.72413	0.0053	0.0298737	yes
BnaA01g04620D	chrA01:2156410-2157466	Purple	Green	OK	13.5424	0	#NAME?	#NAME?	5e-05	0.000600056	yes
BnaA01g04740D	chrA01:2212801-2213549	Purple	Green	OK	4.63178	96.2961	4.37784	5.92752	5e-05	0.000600056	yes
BnaA01g04850D	chrA01:2250711-2252949	Purple	Green	OK	5.56365	0	#NAME?	#NAME?	5e-05	0.000600056	yes
BnaA01g04890D	chrA01:2265792-2266383	Purple	Green	OK	2.13377	0	#NAME?	#NAME?	0.00045	0.00408286	yes
BnaA01g04910D	chrA01:2276331-2278750	Purple	Green	OK	2.30397	6.97733	1.59855	2.19171	0.00445	0.0259779	yes
BnaA01g05380D	chrA01:2515239-2517180	Purple	Green	OK	3.44701	13.5447	1.97431	2.52889	0.0011	0.00852321	yes
BnaA01g05390D	chrA01:2517710-2518386	Purple	Green	OK	5.86979	0	#NAME?	#NAME?	0.0001	0.0011169	yes
BnaA01g05410D	chrA01:2522356-2523157	Purple	Green	OK	64.9061	4.86511	-3.73781	-4.02486	0.00035	0.00329203	yes
BnaA01g05670D	chrA01:2638940-2641142	Purple	Green	OK	1.68613	7.77755	2.2056	2.50747	0.00505	0.028768	yes
BnaA01g06020D	chrA01:2788229-2789549	Purple	Green	OK	2.71072	0	#NAME?	#NAME?	5e-05	0.000600056	yes
BnaA01g06220D	chrA01:2888815-2891435	Purple	Green	OK	4.09735	12.698	1.63183	2.72038	0.00045	0.00408286	yes
BnaA01g06540D	chrA01:3029836-3031066	Purple	Green	OK	46.3629	13.7754	-1.75087	-2.92642	0.0002	0.00205349	yes
BnaA01g06610D	chrA01:3072465-3073755	Purple	Green	OK	1.82876	7.99147	2.1276	2.62095	0.0044	0.0257799	yes
BnaA01g07340D	chrA01:3447653-3449590	Purple	Green	OK	3.13649	11.9674	1.93189	2.70683	0.00115	0.00882952	yes
BnaA01g07460D	chrA01:3476415-3477901	Purple	Green	OK	9.13788	20.5691	1.17055	1.98069	0.0091	0.0458576	yes
BnaA01g07720D	chrA01:3672291-3673263	Purple	Green	OK	1.90599	12.4456	2.70702	3.26045	0.0009	0.00726139	yes
BnaA01g07750D	chrA01:3677107-3685312	Purple	Green	OK	20.5413	62.4673	1.60458	3.07071	0.0001	0.0011169	yes
BnaA01g08120D	chrA01:3845829-3848123	Purple	Green	OK	2.00846	16.578	3.04511	3.705	0.0003	0.00287919	yes
BnaA01g08440D	chrA01:4027409-4032642	Purple	Green	OK	0.931976	8.99598	3.27092	4.50127	5e-05	0.000600056	yes
BnaA01g08450D	chrA01:4036974-4038149	Purple	Green	OK	0	8.04732	inf	#NAME?	5e-05	0.000600056	yes
BnaA01g08750D	chrA01:4227706-4229479	Purple	Green	OK	7.55063	2.48048	-1.60598	-2.38477	0.0015	0.0110332	yes
BnaA01g09150D	chrA01:4465909-4466203	Purple	Green	OK	4.22923	0	#NAME?	#NAME?	0.0092	0.0461007	yes
BnaA01g09220D	chrA01:4497149-4499312	Purple	Green	OK	2.86677	0	#NAME?	#NAME?	5e-05	0.000600056	yes
BnaA01g09640D	chrA01:4731662-4735031	Purple	Green	OK	0.472299	4.49771	3.25142	3.32162	0.00095	0.00758084	yes
BnaA01g09710D	chrA01:4775994-4778689	Purple	Green	OK	2.9213	0	#NAME?	#NAME?	5e-05	0.000600056	yes
BnaA01g09800D	chrA01:4820524-4821566	Purple	Green	OK	0	2.75759	inf	#NAME?	5e-05	0.000600056	yes
BnaA01g10230D	chrA01:5078479-5080772	Purple	Green	OK	3.6227	0	#NAME?	#NAME?	5e-05	0.000600056	yes
BnaA01g10360D	chrA01:5178351-5179997	Purple	Green	OK	14.5296	0	#NAME?	#NAME?	5e-05	0.000600056	yes
BnaA01g10370D	chrA01:5180292-5181178	Purple	Green	OK	11.7275	0	#NAME?	#NAME?	5e-05	0.000600056	yes
BnaA01g10550D	chrA01:5279388-5280801	Purple	Green	OK	4.80677	51.6582	3.42586	5.14594	5e-05	0.000600056	yes
BnaA01g11020D	chrA01:5489717-5490561	Purple	Green	OK	35.9968	10.9233	-1.72046	-2.30586	0.0051	0.0290219	yes
BnaA01g11060D	chrA01:5501168-5505873	Purple	Green	OK	8.70134	3.16012	-1.46126	-2.34069	0.00195	0.013518	yes
BnaA01g11190D	chrA01:5568559-5569405	Purple	Green	OK	1.34704	43.4525	5.01157	4.8627	0.00095	0.00758084	yes
BnaA01g11650D	chrA01:5820560-5826444	Purple	Green	OK	1.89152	0.580962	-1.70303	-2.16016	0.00525	0.0296335	yes
BnaA01g11660D	chrA01:5826887-5827735	Purple	Green	OK	0	28.4019	inf	#NAME?	5e-05	0.000600056	yes
BnaA01g11760D	chrA01:5863606-5867151	Purple	Green	OK	18.4696	1.37881	-3.74365	-4.73342	0.0001	0.0011169	yes
BnaA01g11780D	chrA01:5881093-5884053	Purple	Green	OK	0	2.14613	inf	#NAME?	5e-05	0.000600056	yes
BnaA01g11820D	chrA01:5908427-5908889	Purple	Green	OK	2.23642	0	#NAME?	#NAME?	0.00075	0.00624773	yes
BnaA01g11840D	chrA01:5912555-5914143	Purple	Green	OK	9.72319	0	#NAME?	#NAME?	5e-05	0.000600056	yes
BnaA01g12020D	chrA01:6022055-6025691	Purple	Green	OK	5.19899	1.6857	-1.62489	-2.34734	0.00205	0.0140984	yes
BnaA01g12900D	chrA01:6458179-6460967	Purple	Green	OK	5.36879	13.4373	1.32357	2.0418	0.00835	0.0428804	yes
BnaA01g13130D	chrA01:6592570-6595308	Purple	Green	OK	9.08942	18.9253	1.05806	1.90096	0.00925	0.0462644	yes
BnaA01g13280D	chrA01:6719646-6721806	Purple	Green	OK	19.6667	0.540297	-5.18586	-4.55926	0.00375	0.0227491	yes
BnaA01g13530D	chrA01:6878303-6880568	Purple	Green	OK	0	2.39441	inf	#NAME?	5e-05	0.000600056	yes
BnaA01g13690D	chrA01:6972995-6973436	Purple	Green	OK	0	5.58774	inf	#NAME?	5e-05	0.000600056	yes
BnaA01g13780D	chrA01:7016234-7022008	Purple	Green	OK	0	3.23875	inf	#NAME?	5e-05	0.000600056	yes
BnaA01g14040D	chrA01:7131521-7137004	Purple	Green	OK	1.55433	3.98044	1.35663	2.18336	0.0044	0.0257799	yes
BnaA01g14050D	chrA01:7142005-7144967	Purple	Green	OK	0	2.50712	inf	#NAME?	5e-05	0.000600056	yes
BnaA01g14290D	chrA01:7228175-7229148	Purple	Green	OK	5.14047	16.4324	1.67657	2.27439	0.00305	0.0193026	yes
BnaA01g14420D	chrA01:7291130-7292142	Purple	Green	OK	2.76894	14.0864	2.3469	3.04024	0.0002	0.00205349	yes
BnaA01g14470D	chrA01:7303643-7304751	Purple	Green	OK	15.6756	46.3392	1.56371	2.76293	0.00045	0.00408286	yes
BnaA01g14720D	chrA01:7417622-7420278	Purple	Green	OK	1.11391	4.49342	2.01218	2.49628	0.0055	0.0308006	yes
BnaA01g14790D	chrA01:7478864-7481154	Purple	Green	OK	0	9.03354	inf	#NAME?	5e-05	0.000600056	yes
BnaA01g15140D	chrA01:7712685-7717495	Purple	Green	OK	4.37407	15.7109	1.84472	2.90562	0.00055	0.00481964	yes
BnaA01g16040D	chrA01:8218704-8220828	Purple	Green	OK	0	7.0937	inf	#NAME?	5e-05	0.000600056	yes
BnaA01g16130D	chrA01:8251205-8252277	Purple	Green	OK	248.456	131.195	-0.921275	-1.85664	0.0082	0.0422794	yes
BnaA01g16170D	chrA01:8269717-8270440	Purple	Green	OK	55.2879	0	#NAME?	#NAME?	5e-05	0.000600056	yes
BnaA01g16270D	chrA01:8345981-8346581	Purple	Green	OK	13.1471	0	#NAME?	#NAME?	5e-05	0.000600056	yes
BnaA01g16310D	chrA01:8409464-8411476	Purple	Green	OK	2.82158	0	#NAME?	#NAME?	5e-05	0.000600056	yes
BnaA01g16600D	chrA01:8592030-8593961	Purple	Green	OK	2.44155	7.84028	1.6831	2.32138	0.0037	0.0225311	yes
BnaA01g16670D	chrA01:8693054-8694465	Purple	Green	OK	3.107	0	#NAME?	#NAME?	5e-05	0.000600056	yes
BnaA01g16700D	chrA01:8712116-8714403	Purple	Green	OK	4.69822	0	#NAME?	#NAME?	5e-05	0.000600056	yes
BnaA01g16710D	chrA01:8718496-8722214	Purple	Green	OK	6.96906	1.01702	-2.77662	-3.73294	0.00015	0.00159108	yes
BnaA01g16860D	chrA01:8813522-8814409	Purple	Green	OK	41.676	0	#NAME?	#NAME?	5e-05	0.000600056	yes
BnaA01g17060D	chrA01:8929485-8931142	Purple	Green	OK	2.87711	0	#NAME?	#NAME?	5e-05	0.000600056	yes
BnaA01g17450D	chrA01:9202148-9204251	Purple	Green	OK	6.90179	15.9578	1.20922	2.26737	0.00215	0.0146199	yes
BnaA01g18050D	chrA01:9544547-9544979	Purple	Green	OK	3.40508	55.1071	4.01648	3.94392	0.0006	0.00517851	yes
BnaA01g18090D	chrA01:9558840-9565893	Purple	Green	OK	9.01641	0	#NAME?	#NAME?	5e-05	0.000600056	yes
BnaA01g18470D	chrA01:9997418-9998576	Purple	Green	OK	1.99576	0	#NAME?	#NAME?	5e-05	0.000600056	yes
BnaA01g18480D	chrA01:9998966-10003622	Purple	Green	OK	1.78304	0	#NAME?	#NAME?	5e-05	0.000600056	yes
BnaA01g18890D	chrA01:10356664-10357186	Purple	Green	OK	2.60975	18.267	2.80726	3.1025	0.0022	0.014881	yes
BnaA01g19110D	chrA01:10617288-10618256	Purple	Green	OK	2.07121	33.4233	4.01231	4.45461	0.0013	0.00977745	yes
BnaA01g19330D	chrA01:10864938-10868361	Purple	Green	OK	0	1.71902	inf	#NAME?	5e-05	0.000600056	yes
BnaA01g19390D	chrA01:10901556-10903264	Purple	Green	OK	0	2.665	inf	#NAME?	5e-05	0.000600056	yes
BnaA01g19410D	chrA01:10905296-10905611	Purple	Green	OK	0	2.72853	inf	#NAME?	0.0101	0.0493756	yes
BnaA01g19470D	chrA01:10932352-10933977	Purple	Green	OK	0	3.02244	inf	#NAME?	5e-05	0.000600056	yes
BnaA01g19490D	chrA01:10941656-10942410	Purple	Green	OK	0	2.82093	inf	#NAME?	0.0004	0.0036951	yes
BnaA01g19530D	chrA01:10978992-10979480	Purple	Green	OK	0	2.43322	inf	#NAME?	0.0028	0.0180555	yes
BnaA01g19540D	chrA01:10979849-10982565	Purple	Green	OK	0	2.8721	inf	#NAME?	5e-05	0.000600056	yes
BnaA01g19550D	chrA01:10984778-10985621	Purple	Green	OK	0	2.71564	inf	#NAME?	5e-05	0.000600056	yes
BnaA01g19710D	chrA01:11111408-11112645	Purple	Green	OK	11.386	3.69607	-1.62319	-2.20385	0.0045	0.0262268	yes
BnaA01g21410D	chrA01:13290193-13293308	Purple	Green	OK	2.28251	0	#NAME?	#NAME?	5e-05	0.000600056	yes
BnaA01g21860D	chrA01:14146787-14148039	Purple	Green	OK	2.73748	0	#NAME?	#NAME?	5e-05	0.000600056	yes
BnaA01g22040D	chrA01:14374170-14376635	Purple	Green	OK	4.55864	0	#NAME?	#NAME?	5e-05	0.000600056	yes
BnaA01g22360D	chrA01:14713549-14716157	Purple	Green	OK	0	1.78665	inf	#NAME?	5e-05	0.000600056	yes
BnaA01g22920D	chrA01:15255109-15258162	Purple	Green	OK	20.6348	0.501084	-5.36388	-5.01804	0.00435	0.0255711	yes
BnaA01g22930D	chrA01:15302520-15304601	Purple	Green	OK	7.84178	0	#NAME?	#NAME?	5e-05	0.000600056	yes
BnaA01g23040D	chrA01:15409080-15411801	Purple	Green	OK	4.34357	0.884123	-2.29656	-2.8205	0.00205	0.0140984	yes
BnaA01g23130D	chrA01:15534898-15536125	Purple	Green	OK	0	5.67657	inf	#NAME?	5e-05	0.000600056	yes
BnaA01g23340D	chrA01:15684230-15686623	Purple	Green	OK	4.24219	0	#NAME?	#NAME?	5e-05	0.000600056	yes
BnaA01g23610D	chrA01:15937161-15942941	Purple	Green	OK	3.03787	1.01366	-1.58349	-2.37914	0.00275	0.0178263	yes
BnaA01g24990D	chrA01:17466897-17468391	Purple	Green	OK	3.52138	0.62985	-2.48306	-2.37616	0.0059	0.032574	yes
BnaA01g25030D	chrA01:17510380-17511654	Purple	Green	OK	48.3425	98.3382	1.02446	2.03609	0.00425	0.0251261	yes
BnaA01g25090D	chrA01:17519328-17521317	Purple	Green	OK	7.8167	18.434	1.23774	2.23088	0.0025	0.0165232	yes
BnaA01g25110D	chrA01:17541162-17543965	Purple	Green	OK	13.7484	38.9189	1.50121	2.95953	0.0001	0.0011169	yes
BnaA01g25280D	chrA01:17699460-17699888	Purple	Green	OK	140.031	369.014	1.39793	2.37083	0.00255	0.0168017	yes
BnaA01g25300D	chrA01:17709588-17711487	Purple	Green	OK	5.8722	20.4682	1.80141	3.03066	0.0002	0.00205349	yes
BnaA01g25650D	chrA01:17886583-17887790	Purple	Green	OK	0	3.38713	inf	#NAME?	5e-05	0.000600056	yes
BnaA01g25720D	chrA01:17923592-17926227	Purple	Green	OK	2.88438	0	#NAME?	#NAME?	5e-05	0.000600056	yes
BnaA01g25740D	chrA01:17991779-17992420	Purple	Green	OK	1.77847	0	#NAME?	#NAME?	0.0092	0.0461007	yes
BnaA01g25880D	chrA01:18055031-18056976	Purple	Green	OK	4.47278	12.5865	1.49263	2.27951	0.004	0.0239529	yes
BnaA01g27000D	chrA01:18894287-18896949	Purple	Green	OK	16.3716	5.72757	-1.5152	-2.57693	0.00095	0.00758084	yes
BnaA01g27010D	chrA01:18901193-18907286	Purple	Green	OK	1.67289	0	#NAME?	#NAME?	5e-05	0.000600056	yes
BnaA01g27090D	chrA01:18940708-18944093	Purple	Green	OK	4.60542	0	#NAME?	#NAME?	5e-05	0.000600056	yes
BnaA01g27300D	chrA01:19066711-19067528	Purple	Green	OK	0	42.8537	inf	#NAME?	5e-05	0.000600056	yes
BnaA01g27710D	chrA01:19345306-19346381	Purple	Green	OK	57.8557	25.5288	-1.18034	-2.02726	0.00535	0.0301237	yes
BnaA01g28110D	chrA01:19627416-19628780	Purple	Green	OK	4.97781	45.4735	3.19144	4.1765	0.00025	0.0024567	yes
BnaA01g28350D	chrA01:19803939-19804416	Purple	Green	OK	3.86982	0	#NAME?	#NAME?	5e-05	0.000600056	yes
BnaA01g28610D	chrA01:19887737-19888783	Purple	Green	OK	0	4.25008	inf	#NAME?	5e-05	0.000600056	yes
BnaA01g29140D	chrA01:20167282-20173388	Purple	Green	OK	6.05145	0	#NAME?	#NAME?	5e-05	0.000600056	yes
BnaA01g30270D	chrA01:20809140-20809452	Purple	Green	OK	6.8495	0	#NAME?	#NAME?	0.00025	0.0024567	yes
BnaA01g30280D	chrA01:20812937-20813546	Purple	Green	OK	2.74346	0	#NAME?	#NAME?	5e-05	0.000600056	yes
BnaA01g30320D	chrA01:20838900-20841051	Purple	Green	OK	2.60852	24.0544	3.20499	4.62378	5e-05	0.000600056	yes
BnaA01g30370D	chrA01:20856950-20859072	Purple	Green	OK	0	3.99356	inf	#NAME?	5e-05	0.000600056	yes
BnaA01g30470D	chrA01:20908558-20909551	Purple	Green	OK	1.73199	0	#NAME?	#NAME?	0.0019	0.0132805	yes
BnaA01g30780D	chrA01:21021814-21024261	Purple	Green	OK	13.3189	1.7053	-2.96538	-3.75896	0.00015	0.00159108	yes
BnaA01g31440D	chrA01:21379223-21380643	Purple	Green	OK	2.71451	0	#NAME?	#NAME?	5e-05	0.000600056	yes
BnaA01g31480D	chrA01:21403947-21407394	Purple	Green	OK	1.34612	5.68126	2.0774	2.66428	0.0017	0.0121475	yes
BnaA01g31630D	chrA01:21479174-21480131	Purple	Green	OK	6.01902	71.0247	3.56072	3.79568	0.00025	0.0024567	yes
BnaA01g32060D	chrA01:21668595-21669988	Purple	Green	OK	3.62292	0	#NAME?	#NAME?	0.00015	0.00159108	yes
BnaA01g32640D	chrA01:21993534-21994143	Purple	Green	OK	4.87741	0	#NAME?	#NAME?	5e-05	0.000600056	yes
BnaA01g32720D	chrA01:22118531-22119370	Purple	Green	OK	7.29332	0	#NAME?	#NAME?	5e-05	0.000600056	yes
BnaA01g32770D	chrA01:22135340-22138509	Purple	Green	OK	24.6139	8.55898	-1.52396	-2.79297	5e-05	0.000600056	yes
BnaA01g33380D	chrA01:22619022-22624094	Purple	Green	OK	1.7893	0.406645	-2.13755	-2.3838	0.0056	0.0312514	yes
BnaA01g33400D	chrA01:22626784-22628182	Purple	Green	OK	4.71105	44.2353	3.23108	4.76373	5e-05	0.000600056	yes
BnaA01g33420D	chrA01:22639436-22640999	Purple	Green	OK	0	3.09294	inf	#NAME?	5e-05	0.000600056	yes
BnaA01g33500D	chrA01:22699697-22702639	Purple	Green	OK	14.7841	0	#NAME?	#NAME?	5e-05	0.000600056	yes
BnaA01g33600D	chrA01:22747396-22749995	Purple	Green	OK	0	3.16192	inf	#NAME?	5e-05	0.000600056	yes
BnaA01g33620D	chrA01:22757905-22761872	Purple	Green	OK	1.51199	27.5633	4.18823	6.34384	5e-05	0.000600056	yes
BnaA01g33640D	chrA01:22768677-22774131	Purple	Green	OK	0.452117	2.39558	2.40561	2.53663	0.0056	0.0312514	yes
BnaA01g33700D	chrA01:22789852-22794992	Purple	Green	OK	0.568068	3.47114	2.61127	2.88874	0.0025	0.0165232	yes
BnaA01g33850D	chrA01:22925525-22927518	Purple	Green	OK	4.43344	0	#NAME?	#NAME?	5e-05	0.000600056	yes
BnaA01g34410D	chrA01:23224829-23232728	Purple	Green	OK	2.1343	0.188487	-3.50123	-3.14932	0.00565	0.031492	yes
BnaA01g34580D	chrA01_random:48403-52297	Purple	Green	OK	1.51257	4.79949	1.66588	2.0509	0.00825	0.042503	yes
BnaA01g34610D	chrA01_random:55859-57664	Purple	Green	OK	24.3386	1.51961	-4.00147	-4.99858	5e-05	0.000600056	yes
BnaA01g34620D	chrA01_random:62766-64323	Purple	Green	OK	20.7142	0	#NAME?	#NAME?	5e-05	0.000600056	yes
BnaA01g34980D	chrA01_random:304735-306520	Purple	Green	OK	3.73669	0	#NAME?	#NAME?	5e-05	0.000600056	yes
BnaA01g35660D	chrA01_random:876768-879051	Purple	Green	OK	0	3.5529	inf	#NAME?	5e-05	0.000600056	yes
BnaA01g35710D	chrA01_random:939521-941098	Purple	Green	OK	3.04649	0	#NAME?	#NAME?	5e-05	0.000600056	yes
BnaA01g35920D	chrA01_random:1418737-1421314	Purple	Green	OK	4.80985	0.482883	-3.31625	-3.0345	0.00815	0.0420622	yes
BnaA01g36230D	chrA01_random:1635876-1639233	Purple	Green	OK	4.70517	0.98143	-2.26129	-2.48194	0.0041	0.024424	yes
BnaA01g36810D	chrA01_random:2294531-2295629	Purple	Green	OK	12.2534	4.89383	-1.32415	-1.95208	0.0092	0.0461007	yes
BnaA01g36920D	chrA01_random:2380562-2381744	Purple	Green	OK	1.44326	17.1672	3.57225	4.35819	5e-05	0.000600056	yes
BnaA01g37210D	chrA01_random:2544677-2548992	Purple	Green	OK	1.35235	4.20939	1.63815	2.2959	0.00405	0.0242071	yes
BnaA02g00100D	chrA02:30909-32867	Purple	Green	OK	0	27.8251	inf	#NAME?	5e-05	0.000600056	yes
BnaA02g00470D	chrA02:183466-184740	Purple	Green	OK	9.68024	0	#NAME?	#NAME?	5e-05	0.000600056	yes
BnaA02g00490D	chrA02:186684-189010	Purple	Green	OK	9.27196	0	#NAME?	#NAME?	5e-05	0.000600056	yes
BnaA02g00550D	chrA02:200238-201960	Purple	Green	OK	0	2.16857	inf	#NAME?	5e-05	0.000600056	yes
BnaA02g00720D	chrA02:267138-269815	Purple	Green	OK	0.565953	3.07812	2.44329	2.49842	0.00565	0.031492	yes
BnaA02g00880D	chrA02:337816-340833	Purple	Green	OK	1.54006	26.1794	4.08738	5.37409	5e-05	0.000600056	yes
BnaA02g01340D	chrA02:605646-609763	Purple	Green	OK	1.61825	6.04228	1.90066	2.83651	0.0003	0.00287919	yes
BnaA02g01700D	chrA02:783991-787185	Purple	Green	OK	3.91246	0	#NAME?	#NAME?	5e-05	0.000600056	yes
BnaA02g01820D	chrA02:835625-836893	Purple	Green	OK	0	2.41776	inf	#NAME?	5e-05	0.000600056	yes
BnaA02g01970D	chrA02:894880-896015	Purple	Green	OK	10.8047	0	#NAME?	#NAME?	5e-05	0.000600056	yes
BnaA02g02070D	chrA02:924897-925424	Purple	Green	OK	4.46177	0	#NAME?	#NAME?	0.0025	0.0165232	yes
BnaA02g02090D	chrA02:927679-928023	Purple	Green	OK	7.25135	0	#NAME?	#NAME?	0.00155	0.0112947	yes
BnaA02g02220D	chrA02:966608-969766	Purple	Green	OK	10.8396	4.47295	-1.27701	-2.23245	0.003	0.0190614	yes
BnaA02g02540D	chrA02:1134954-1135861	Purple	Green	OK	10.3202	63.0226	2.61041	4.28296	0.0001	0.0011169	yes
BnaA02g02560D	chrA02:1140573-1141539	Purple	Green	OK	93.0208	326.115	1.80975	3.92817	0.0003	0.00287919	yes
BnaA02g02720D	chrA02:1225505-1227346	Purple	Green	OK	2.695	0	#NAME?	#NAME?	5e-05	0.000600056	yes
BnaA02g02800D	chrA02:1253444-1254575	Purple	Green	OK	0	4.03368	inf	#NAME?	5e-05	0.000600056	yes
BnaA02g02880D	chrA02:1289762-1291467	Purple	Green	OK	4.84239	0	#NAME?	#NAME?	5e-05	0.000600056	yes
BnaA02g02910D	chrA02:1297933-1298430	Purple	Green	OK	14535.4	0	#NAME?	#NAME?	5e-05	0.000600056	yes
BnaA02g03150D	chrA02:1389790-1391915	Purple	Green	OK	2.04991	0	#NAME?	#NAME?	5e-05	0.000600056	yes
BnaA02g03360D	chrA02:1493940-1501379	Purple	Green	OK	1.91948	0	#NAME?	#NAME?	5e-05	0.000600056	yes
BnaA02g03370D	chrA02:1501709-1503266	Purple	Green	OK	8.44939	0	#NAME?	#NAME?	5e-05	0.000600056	yes
BnaA02g03400D	chrA02:1521039-1522460	Purple	Green	OK	5.51832	18.9898	1.78293	2.4954	0.00185	0.0130048	yes
BnaA02g03770D	chrA02:1732908-1736279	Purple	Green	OK	6.91294	0.387913	-4.1555	-4.27056	0.00025	0.0024567	yes
BnaA02g04260D	chrA02:1909605-1910920	Purple	Green	OK	0	41.9259	inf	#NAME?	5e-05	0.000600056	yes
BnaA02g04300D	chrA02:1928915-1932048	Purple	Green	OK	6.96588	0	#NAME?	#NAME?	5e-05	0.000600056	yes
BnaA02g04390D	chrA02:1961266-1962844	Purple	Green	OK	6.71795	0.793294	-3.08209	-2.98545	0.0072	0.0381166	yes
BnaA02g04670D	chrA02:2079909-2083715	Purple	Green	OK	4.50092	12.835	1.51179	2.68646	0.00045	0.00408286	yes
BnaA02g04750D	chrA02:2102044-2103061	Purple	Green	OK	30.1679	12.566	-1.26349	-2.2108	0.00355	0.021804	yes
BnaA02g04780D	chrA02:2120004-2122975	Purple	Green	OK	0.80195	7.71432	3.26596	4.19064	5e-05	0.000600056	yes
BnaA02g04900D	chrA02:2172417-2173478	Purple	Green	OK	7.80279	0	#NAME?	#NAME?	5e-05	0.000600056	yes
BnaA02g04910D	chrA02:2178471-2180736	Purple	Green	OK	4.30005	16.1278	1.90712	2.66887	0.0012	0.00912598	yes
BnaA02g05000D	chrA02:2210053-2212643	Purple	Green	OK	31.1081	6.19957	-2.32705	-3.3506	0.0002	0.00205349	yes
BnaA02g05040D	chrA02:2241469-2242324	Purple	Green	OK	104.888	405.107	1.94945	3.58462	5e-05	0.000600056	yes
BnaA02g05060D	chrA02:2257271-2259266	Purple	Green	OK	144.673	442.501	1.61289	2.62694	0.0009	0.00726139	yes
BnaA02g05110D	chrA02:2298179-2301260	Purple	Green	OK	16.8719	5.88586	-1.5193	-2.66048	0.00075	0.00624773	yes
BnaA02g05120D	chrA02:2301701-2303055	Purple	Green	OK	59.8417	17.4539	-1.7776	-3.06374	5e-05	0.000600056	yes
BnaA02g05130D	chrA02:2303730-2305680	Purple	Green	OK	42.9161	90.1314	1.07051	2.17382	0.00245	0.0162834	yes
BnaA02g05200D	chrA02:2338582-2339996	Purple	Green	OK	20.4133	7.43163	-1.45776	-2.05046	0.0096	0.0475991	yes
BnaA02g05230D	chrA02:2376861-2379165	Purple	Green	OK	78.8251	0.436431	-7.49676	-7.30673	0.00165	0.0118456	yes
BnaA02g05300D	chrA02:2409851-2413683	Purple	Green	OK	9.13622	3.18929	-1.51836	-2.52749	0.00115	0.00882952	yes
BnaA02g05310D	chrA02:2417255-2419340	Purple	Green	OK	0	2.76324	inf	#NAME?	5e-05	0.000600056	yes
BnaA02g05320D	chrA02:2420007-2420699	Purple	Green	OK	133.462	309.54	1.21369	2.49341	0.0008	0.00659907	yes
BnaA02g05700D	chrA02:2619113-2622386	Purple	Green	OK	0	2.38721	inf	#NAME?	5e-05	0.000600056	yes
BnaA02g05790D	chrA02:2674726-2675766	Purple	Green	OK	0	2.07635	inf	#NAME?	0.00025	0.0024567	yes
BnaA02g06420D	chrA02:3063663-3065761	Purple	Green	OK	29.9535	11.5362	-1.37656	-2.50592	0.0009	0.00726139	yes
BnaA02g06460D	chrA02:3089661-3091781	Purple	Green	OK	12.4116	5.03644	-1.30121	-2.35974	0.00295	0.0188296	yes
BnaA02g06580D	chrA02:3141492-3143537	Purple	Green	OK	1.55917	5.41055	1.79499	2.30602	0.0036	0.0220225	yes
BnaA02g07740D	chrA02:3675962-3676964	Purple	Green	OK	26.6584	7.55989	-1.81816	-2.7088	0.0004	0.0036951	yes
BnaA02g08230D	chrA02:3906003-3906544	Purple	Green	OK	0	12.4492	inf	#NAME?	5e-05	0.000600056	yes
BnaA02g08670D	chrA02:4282055-4282728	Purple	Green	OK	3.1308	0	#NAME?	#NAME?	5e-05	0.000600056	yes
BnaA02g09170D	chrA02:4534919-4537470	Purple	Green	OK	3.77715	0.690292	-2.45202	-2.59134	0.0048	0.0275396	yes
BnaA02g09210D	chrA02:4563860-4564636	Purple	Green	OK	4.81539	0	#NAME?	#NAME?	0.007	0.0372671	yes
BnaA02g09540D	chrA02:4740257-4741737	Purple	Green	OK	44.1916	87.0321	0.977777	1.91648	0.00695	0.0370809	yes
BnaA02g09600D	chrA02:4821753-4822167	Purple	Green	OK	0	1.6649	inf	#NAME?	0.0101	0.0493756	yes
BnaA02g09620D	chrA02:4833678-4835887	Purple	Green	OK	1.40711	4.71844	1.74557	2.08765	0.00675	0.0362796	yes
BnaA02g09700D	chrA02:4877375-4878353	Purple	Green	OK	6.41278	50.9951	2.99134	4.29398	5e-05	0.000600056	yes
BnaA02g10000D	chrA02:5026486-5028315	Purple	Green	OK	0	2.84749	inf	#NAME?	5e-05	0.000600056	yes
BnaA02g10220D	chrA02:5180404-5181125	Purple	Green	OK	0	46.0503	inf	#NAME?	5e-05	0.000600056	yes
BnaA02g10230D	chrA02:5184250-5186137	Purple	Green	OK	0	3.19832	inf	#NAME?	5e-05	0.000600056	yes
BnaA02g10300D	chrA02:5254982-5257178	Purple	Green	OK	3.48267	0	#NAME?	#NAME?	5e-05	0.000600056	yes
BnaA02g10320D	chrA02:5258285-5259197	Purple	Green	OK	11.2903	0	#NAME?	#NAME?	5e-05	0.000600056	yes
BnaA02g10750D	chrA02:5561842-5562603	Purple	Green	OK	23.4382	2.34082	-3.32378	-3.64259	0.0006	0.00517851	yes
BnaA02g10820D	chrA02:5581466-5584370	Purple	Green	OK	1.80326	7.66428	2.08754	2.88798	0.00065	0.00553406	yes
BnaA02g11430D	chrA02:5995398-5998478	Purple	Green	OK	10.8378	1.2097	-3.16336	-4.49198	5e-05	0.000600056	yes
BnaA02g12020D	chrA02:6294538-6297692	Purple	Green	OK	12.1637	0.745439	-4.02835	-3.75609	0.00175	0.0124272	yes
BnaA02g12080D	chrA02:6321190-6323067	Purple	Green	OK	7.91091	0	#NAME?	#NAME?	5e-05	0.000600056	yes
BnaA02g12270D	chrA02:6487015-6487777	Purple	Green	OK	25.44	0	#NAME?	#NAME?	5e-05	0.000600056	yes
BnaA02g12480D	chrA02:6692867-6695036	Purple	Green	OK	1.90155	0	#NAME?	#NAME?	5e-05	0.000600056	yes
BnaA02g12680D	chrA02:6824752-6828831	Purple	Green	OK	2.86374	0	#NAME?	#NAME?	5e-05	0.000600056	yes
BnaA02g13020D	chrA02:7077798-7080511	Purple	Green	OK	5.4303	1.15384	-2.23459	-2.83041	0.00095	0.00758084	yes
BnaA02g13110D	chrA02:7179223-7180582	Purple	Green	OK	2.34051	0	#NAME?	#NAME?	5e-05	0.000600056	yes
BnaA02g13140D	chrA02:7201300-7202576	Purple	Green	OK	21.8861	0	#NAME?	#NAME?	5e-05	0.000600056	yes
BnaA02g13320D	chrA02:7315257-7315860	Purple	Green	OK	45.6566	235.116	2.36448	4.50472	5e-05	0.000600056	yes
BnaA02g13880D	chrA02:7682413-7685026	Purple	Green	OK	1.69254	0	#NAME?	#NAME?	5e-05	0.000600056	yes
BnaA02g13970D	chrA02:7781153-7784921	Purple	Green	OK	7.71873	0	#NAME?	#NAME?	5e-05	0.000600056	yes
BnaA02g14230D	chrA02:7987863-7989804	Purple	Green	OK	0	6.35052	inf	#NAME?	5e-05	0.000600056	yes
BnaA02g14260D	chrA02:8008754-8009501	Purple	Green	OK	4.42032	0	#NAME?	#NAME?	0.00015	0.00159108	yes
BnaA02g14660D	chrA02:8318513-8320487	Purple	Green	OK	0	4.85274	inf	#NAME?	5e-05	0.000600056	yes
BnaA02g15230D	chrA02:8770278-8771153	Purple	Green	OK	152.731	36.9366	-2.04787	-3.52185	5e-05	0.000600056	yes
BnaA02g15900D	chrA02:9353381-9353786	Purple	Green	OK	40.1126	0	#NAME?	#NAME?	5e-05	0.000600056	yes
BnaA02g15910D	chrA02:9385192-9385825	Purple	Green	OK	7938.46	21.1929	-8.54914	-1.12701	0.00165	0.0118456	yes
BnaA02g16290D	chrA02:9702002-9704063	Purple	Green	OK	2.10868	0	#NAME?	#NAME?	5e-05	0.000600056	yes
BnaA02g16590D	chrA02:9902782-9903696	Purple	Green	OK	2.64353	17.4164	2.71991	2.91656	0.00255	0.0168017	yes
BnaA02g16680D	chrA02:9965247-9966355	Purple	Green	OK	2.49467	11.4779	2.20194	2.90202	0.00135	0.0100731	yes
BnaA02g16970D	chrA02:10215403-10216264	Purple	Green	OK	38.9951	122.401	1.65025	3.17168	5e-05	0.000600056	yes
BnaA02g17890D	chrA02:10822694-10823152	Purple	Green	OK	0	115.832	inf	#NAME?	5e-05	0.000600056	yes
BnaA02g17920D	chrA02:10835414-10835636	Purple	Green	OK	0	7.35421	inf	#NAME?	0.0101	0.0493756	yes
BnaA02g17930D	chrA02:10838926-10841356	Purple	Green	OK	0	3.4764	inf	#NAME?	5e-05	0.000600056	yes
BnaA02g18050D	chrA02:10898340-10898922	Purple	Green	OK	0	24.9567	inf	#NAME?	5e-05	0.000600056	yes
BnaA02g18060D	chrA02:10904207-10904943	Purple	Green	OK	0	6.06253	inf	#NAME?	5e-05	0.000600056	yes
BnaA02g18630D	chrA02:11393872-11394655	Purple	Green	OK	3.79254	0	#NAME?	#NAME?	5e-05	0.000600056	yes
BnaA02g18860D	chrA02:11618589-11619483	Purple	Green	OK	0	7.98359	inf	#NAME?	5e-05	0.000600056	yes
BnaA02g18970D	chrA02:11721731-11722656	Purple	Green	OK	2.89141	41.4739	3.84236	4.83641	5e-05	0.000600056	yes
BnaA02g19370D	chrA02:12031807-12033295	Purple	Green	OK	1.26906	7.93679	2.64479	3.09837	0.0009	0.00726139	yes
BnaA02g19410D	chrA02:12043227-12044052	Purple	Green	OK	0	4.011	inf	#NAME?	5e-05	0.000600056	yes
BnaA02g19640D	chrA02:12196074-12198191	Purple	Green	OK	11.41	28.3587	1.31349	2.41822	0.00105	0.00819322	yes
BnaA02g20170D	chrA02:12472795-12475058	Purple	Green	OK	0	2.35784	inf	#NAME?	5e-05	0.000600056	yes
BnaA02g20530D	chrA02:12870061-12872579	Purple	Green	OK	47.4848	18.9138	-1.32803	-2.63308	0.00035	0.00329203	yes
BnaA02g21070D	chrA02:13408255-13413263	Purple	Green	OK	29.1994	163.447	2.48481	4.63422	5e-05	0.000600056	yes
BnaA02g21580D	chrA02:13951964-13954793	Purple	Green	OK	37.3975	11.1085	-1.75128	-3.32349	5e-05	0.000600056	yes
BnaA02g22240D	chrA02:14724302-14725198	Purple	Green	OK	28.5545	79.2864	1.47336	2.66653	0.00345	0.0212673	yes
BnaA02g22550D	chrA02:15093550-15096599	Purple	Green	OK	0	2.2788	inf	#NAME?	5e-05	0.000600056	yes
BnaA02g23460D	chrA02:16676903-16681099	Purple	Green	OK	1.12524	10.5042	3.22266	4.69	5e-05	0.000600056	yes
BnaA02g23820D	chrA02:17130064-17131161	Purple	Green	OK	59.6481	17.3388	-1.78247	-3.12359	5e-05	0.000600056	yes
BnaA02g24170D	chrA02:17516410-17519592	Purple	Green	OK	9.19198	0	#NAME?	#NAME?	5e-05	0.000600056	yes
BnaA02g24180D	chrA02:17538998-17542126	Purple	Green	OK	5.19156	0	#NAME?	#NAME?	5e-05	0.000600056	yes
BnaA02g24230D	chrA02:17608136-17608783	Purple	Green	OK	4.90526	0	#NAME?	#NAME?	5e-05	0.000600056	yes
BnaA02g24310D	chrA02:17681409-17684053	Purple	Green	OK	15.7613	0	#NAME?	#NAME?	5e-05	0.000600056	yes
BnaA02g24640D	chrA02:17970130-17972862	Purple	Green	OK	4.57012	0.690515	-2.72649	-3.02674	0.0009	0.00726139	yes
BnaA02g25420D	chrA02:18708727-18709843	Purple	Green	OK	6.7042	0	#NAME?	#NAME?	5e-05	0.000600056	yes
BnaA02g25430D	chrA02:18709898-18710444	Purple	Green	OK	3.9549	0	#NAME?	#NAME?	0.00055	0.00481964	yes
BnaA02g26710D	chrA02:19699764-19703257	Purple	Green	OK	3.50332	1.16654	-1.58649	-2.04795	0.00665	0.0359531	yes
BnaA02g27310D	chrA02:20156073-20157699	Purple	Green	OK	5.97638	0	#NAME?	#NAME?	5e-05	0.000600056	yes
BnaA02g27670D	chrA02:20432458-20432809	Purple	Green	OK	0	23.8687	inf	#NAME?	5e-05	0.000600056	yes
BnaA02g27890D	chrA02:20589895-20591472	Purple	Green	OK	0.692304	4.19283	2.59845	2.62229	0.00645	0.0350967	yes
BnaA02g28610D	chrA02:21040785-21041916	Purple	Green	OK	0	1.68112	inf	#NAME?	0.0001	0.0011169	yes
BnaA02g28660D	chrA02:21066932-21067715	Purple	Green	OK	5.29748	140.218	4.72622	6.3579	5e-05	0.000600056	yes
BnaA02g29770D	chrA02:21661328-21662335	Purple	Green	OK	0	2.25501	inf	#NAME?	5e-05	0.000600056	yes
BnaA02g30350D	chrA02:21985467-21986936	Purple	Green	OK	2.37029	0	#NAME?	#NAME?	5e-05	0.000600056	yes
BnaA02g30530D	chrA02:22081927-22085018	Purple	Green	OK	5.32005	0	#NAME?	#NAME?	5e-05	0.000600056	yes
BnaA02g30780D	chrA02:22208968-22213737	Purple	Green	OK	1.83279	9.44338	2.36526	3.44621	0.00045	0.00408286	yes
BnaA02g30910D	chrA02:22301950-22303253	Purple	Green	OK	17.7439	83.8048	2.23971	3.74061	5e-05	0.000600056	yes
BnaA02g31110D	chrA02:22502223-22506466	Purple	Green	OK	7.66179	0	#NAME?	#NAME?	5e-05	0.000600056	yes
BnaA02g31570D	chrA02:22775154-22778880	Purple	Green	OK	28.8826	85.0782	1.55859	2.82233	0.0003	0.00287919	yes
BnaA02g31900D	chrA02:23001727-23003859	Purple	Green	OK	0	4.92617	inf	#NAME?	5e-05	0.000600056	yes
BnaA02g32660D	chrA02:23474535-23476302	Purple	Green	OK	1.91989	0	#NAME?	#NAME?	5e-05	0.000600056	yes
BnaA02g32890D	chrA02:23598566-23600369	Purple	Green	OK	5.96189	0	#NAME?	#NAME?	5e-05	0.000600056	yes
BnaA02g33190D	chrA02:23758377-23759487	Purple	Green	OK	10.4294	26.8267	1.36301	2.16367	0.0047	0.0271408	yes
BnaA02g33230D	chrA02:23787372-23790145	Purple	Green	OK	16.0228	40.6734	1.34395	2.27651	0.00215	0.0146199	yes
BnaA02g33600D	chrA02:24090768-24092176	Purple	Green	OK	5.77508	0	#NAME?	#NAME?	5e-05	0.000600056	yes
BnaA02g33780D	chrA02:24212156-24214147	Purple	Green	OK	2.01543	0	#NAME?	#NAME?	5e-05	0.000600056	yes
BnaA02g33960D	chrA02:24298228-24303756	Purple	Green	OK	2.85492	0	#NAME?	#NAME?	5e-05	0.000600056	yes
BnaA02g34020D	chrA02:24326765-24329738	Purple	Green	OK	0	5.0523	inf	#NAME?	5e-05	0.000600056	yes
BnaA02g34030D	chrA02:24330096-24330785	Purple	Green	OK	0	11.159	inf	#NAME?	5e-05	0.000600056	yes
BnaA02g34830D	chrA02:24764884-24766650	Purple	Green	OK	8.43163	20.2203	1.26192	2.19019	0.0027	0.0175555	yes
BnaA02g35000D	chrA02_random:26967-29998	Purple	Green	OK	5.04256	0	#NAME?	#NAME?	5e-05	0.000600056	yes
BnaA02g35010D	chrA02_random:30866-34465	Purple	Green	OK	5.34882	0.344174	-3.95801	-3.68494	0.00425	0.0251261	yes
BnaA02g35160D	chrA02_random:85557-86775	Purple	Green	OK	2.87679	0	#NAME?	#NAME?	5e-05	0.000600056	yes
BnaA02g36270D	chrA02_random:822008-823461	Purple	Green	OK	36.132	13.2336	-1.44907	-2.52682	0.00095	0.00758084	yes
BnaA02g36380D	chrA02_random:899575-900431	Purple	Green	OK	2.54981	17.9641	2.81666	2.81749	0.00295	0.0188296	yes
BnaA02g36490D	chrA02_random:980586-983735	Purple	Green	OK	2.74522	8.29319	1.595	2.40277	0.00305	0.0193026	yes
BnaA02g36610D	chrA02_random:1132827-1134218	Purple	Green	OK	2.1842	0	#NAME?	#NAME?	0.00015	0.00159108	yes
BnaA03g00100D	chrA03:26031-27518	Purple	Green	OK	0.939824	5.3038	2.49656	2.68377	0.0033	0.0205242	yes
BnaA03g00280D	chrA03:106234-108415	Purple	Green	OK	0.822374	6.61302	3.00744	3.11709	0.0026	0.0170575	yes
BnaA03g00720D	chrA03:309822-310401	Purple	Green	OK	4.42721	156.709	5.14555	5.80574	0.0001	0.0011169	yes
BnaA03g00730D	chrA03:311264-311893	Purple	Green	OK	0	8.73453	inf	#NAME?	5e-05	0.000600056	yes
BnaA03g00780D	chrA03:337557-338289	Purple	Green	OK	0	9.56268	inf	#NAME?	5e-05	0.000600056	yes
BnaA03g00870D	chrA03:378728-380541	Purple	Green	OK	0	4.75885	inf	#NAME?	5e-05	0.000600056	yes
BnaA03g01910D	chrA03:872669-874271	Purple	Green	OK	1.82571	9.21931	2.3362	3.17244	0.0005	0.00447196	yes
BnaA03g02070D	chrA03:950438-951175	Purple	Green	OK	39.8576	0	#NAME?	#NAME?	5e-05	0.000600056	yes
BnaA03g02310D	chrA03:1058767-1059284	Purple	Green	OK	0	772.373	inf	#NAME?	5e-05	0.000600056	yes
BnaA03g02320D	chrA03:1059586-1060127	Purple	Green	OK	0	40.3487	inf	#NAME?	5e-05	0.000600056	yes
BnaA03g02620D	chrA03:1236342-1238821	Purple	Green	OK	1.85873	0	#NAME?	#NAME?	5e-05	0.000600056	yes
BnaA03g02630D	chrA03:1239607-1242049	Purple	Green	OK	0.772751	6.6848	3.11281	3.52609	0.00115	0.00882952	yes
BnaA03g02850D	chrA03:1376253-1377875	Purple	Green	OK	0	1.81361	inf	#NAME?	0.00015	0.00159108	yes
BnaA03g02870D	chrA03:1386982-1388507	Purple	Green	OK	2.92989	15.5592	2.40885	2.87608	0.00195	0.013518	yes
BnaA03g02960D	chrA03:1428995-1429559	Purple	Green	OK	3.19619	0	#NAME?	#NAME?	0.0001	0.0011169	yes
BnaA03g03010D	chrA03:1456054-1459764	Purple	Green	OK	2.16775	0	#NAME?	#NAME?	5e-05	0.000600056	yes
BnaA03g03140D	chrA03:1507824-1510297	Purple	Green	OK	17.202	4.49792	-1.93524	-3.21237	5e-05	0.000600056	yes
BnaA03g03240D	chrA03:1577548-1580649	Purple	Green	OK	19.6291	6.65709	-1.56003	-2.72446	0.00035	0.00329203	yes
BnaA03g04030D	chrA03:1880576-1882934	Purple	Green	OK	6.29827	0.873135	-2.85068	-2.85295	0.00325	0.0202919	yes
BnaA03g04200D	chrA03:1944807-1946438	Purple	Green	OK	8.67023	27.5353	1.66714	2.60888	0.0013	0.00977745	yes
BnaA03g04340D	chrA03:2032179-2033374	Purple	Green	OK	0	2.42975	inf	#NAME?	5e-05	0.000600056	yes
BnaA03g04440D	chrA03:2074922-2080271	Purple	Green	OK	2.88555	14.7434	2.35315	4.35731	5e-05	0.000600056	yes
BnaA03g04470D	chrA03:2094213-2097364	Purple	Green	OK	1.62298	7.14709	2.13871	2.71409	0.00105	0.00819322	yes
BnaA03g04530D	chrA03:2121157-2123366	Purple	Green	OK	13.4973	5.74903	-1.23129	-2.03934	0.0067	0.0361381	yes
BnaA03g04590D	chrA03:2138954-2140406	Purple	Green	OK	15.7186	2.07567	-2.92082	-3.88453	0.0001	0.0011169	yes
BnaA03g04730D	chrA03:2206403-2209147	Purple	Green	OK	2.12493	0	#NAME?	#NAME?	5e-05	0.000600056	yes
BnaA03g05080D	chrA03:2330856-2332401	Purple	Green	OK	6.83023	1.28014	-2.41563	-2.3475	0.0095	0.0472055	yes
BnaA03g05110D	chrA03:2338558-2342489	Purple	Green	OK	33.0357	2.07929	-3.98986	-5.08543	5e-05	0.000600056	yes
BnaA03g05320D	chrA03:2452555-2453575	Purple	Green	OK	3.99331	41.5715	3.37994	4.2303	0.00225	0.0151935	yes
BnaA03g05810D	chrA03:2645417-2647622	Purple	Green	OK	6.36428	24.8374	1.96445	3.22206	5e-05	0.000600056	yes
BnaA03g05820D	chrA03:2648387-2651805	Purple	Green	OK	19.3005	4.35081	-2.14928	-3.64961	5e-05	0.000600056	yes
BnaA03g05840D	chrA03:2658163-2659107	Purple	Green	OK	155.032	0	#NAME?	#NAME?	5e-05	0.000600056	yes
BnaA03g06500D	chrA03:2905016-2909006	Purple	Green	OK	2.03189	0	#NAME?	#NAME?	5e-05	0.000600056	yes
BnaA03g06640D	chrA03:2966295-2968127	Purple	Green	OK	11.1344	4.28811	-1.37662	-2.14401	0.00375	0.0227491	yes
BnaA03g06770D	chrA03:3026106-3027724	Purple	Green	OK	0	2.82984	inf	#NAME?	5e-05	0.000600056	yes
BnaA03g06790D	chrA03:3037821-3041215	Purple	Green	OK	25.2551	61.4958	1.28391	2.10014	0.00445	0.0259779	yes
BnaA03g07350D	chrA03:3263602-3264175	Purple	Green	OK	0	2.09699	inf	#NAME?	0.00525	0.0296335	yes
BnaA03g07860D	chrA03:3508240-3510840	Purple	Green	OK	1.73917	17.7232	3.34917	4.4686	5e-05	0.000600056	yes
BnaA03g08140D	chrA03:3686600-3701261	Purple	Green	OK	10.3623	3.13824	-1.72331	-2.69579	0.00045	0.00408286	yes
BnaA03g08170D	chrA03:3706823-3709682	Purple	Green	OK	0	2.80853	inf	#NAME?	5e-05	0.000600056	yes
BnaA03g08270D	chrA03:3742367-3743506	Purple	Green	OK	2.68711	0	#NAME?	#NAME?	5e-05	0.000600056	yes
BnaA03g08570D	chrA03:3879978-3883835	Purple	Green	OK	4.84392	0	#NAME?	#NAME?	5e-05	0.000600056	yes
BnaA03g08590D	chrA03:3886299-3887566	Purple	Green	OK	7.06581	37.7858	2.41892	3.68371	0.00035	0.00329203	yes
BnaA03g08950D	chrA03:4052446-4053071	Purple	Green	OK	0	2.69908	inf	#NAME?	5e-05	0.000600056	yes
BnaA03g09060D	chrA03:4083921-4085907	Purple	Green	OK	4.35189	1.04646	-2.05613	-2.46422	0.0033	0.0205242	yes
BnaA03g09170D	chrA03:4129419-4129845	Purple	Green	OK	71.2332	0	#NAME?	#NAME?	5e-05	0.000600056	yes
BnaA03g09190D	chrA03:4133714-4134360	Purple	Green	OK	17.6139	0	#NAME?	#NAME?	5e-05	0.000600056	yes
BnaA03g09650D	chrA03:4312710-4313644	Purple	Green	OK	7.94867	0	#NAME?	#NAME?	0.00045	0.00408286	yes
BnaA03g09900D	chrA03:4464876-4469450	Purple	Green	OK	2.3061	5.42728	1.23477	1.99451	0.00555	0.0310264	yes
BnaA03g09950D	chrA03:4483803-4485210	Purple	Green	OK	0	4.26309	inf	#NAME?	5e-05	0.000600056	yes
BnaA03g10030D	chrA03:4503363-4505158	Purple	Green	OK	0	2.06194	inf	#NAME?	5e-05	0.000600056	yes
BnaA03g10510D	chrA03:4738583-4739527	Purple	Green	OK	11.3522	2.56786	-2.14433	-2.34974	0.0053	0.0298737	yes
BnaA03g10650D	chrA03:4804771-4807192	Purple	Green	OK	3.92246	0.932919	-2.07193	-2.38714	0.00545	0.0306008	yes
BnaA03g10700D	chrA03:4821131-4821840	Purple	Green	OK	0	2.1135	inf	#NAME?	0.00675	0.0362796	yes
BnaA03g11080D	chrA03:4983300-4985045	Purple	Green	OK	0	3.95104	inf	#NAME?	5e-05	0.000600056	yes
BnaA03g11100D	chrA03:4991076-4992647	Purple	Green	OK	3.36954	0	#NAME?	#NAME?	5e-05	0.000600056	yes
BnaA03g11170D	chrA03:5020493-5022518	Purple	Green	OK	0	3.442	inf	#NAME?	5e-05	0.000600056	yes
BnaA03g11520D	chrA03:5162462-5164074	Purple	Green	OK	16.4772	3.23013	-2.35081	-3.40142	5e-05	0.000600056	yes
BnaA03g11990D	chrA03:5433883-5436009	Purple	Green	OK	57.4376	8.88709	-2.69221	-4.59468	5e-05	0.000600056	yes
BnaA03g12250D	chrA03:5519670-5528551	Purple	Green	OK	9.95268	2.82234	-1.81819	-3.43145	5e-05	0.000600056	yes
BnaA03g12310D	chrA03:5592008-5592991	Purple	Green	OK	21.4372	105.716	2.30201	3.7496	5e-05	0.000600056	yes
BnaA03g12330D	chrA03:5620142-5624069	Purple	Green	OK	0	2.28854	inf	#NAME?	0.0031	0.019515	yes
BnaA03g12370D	chrA03:5637438-5637705	Purple	Green	OK	0	18.8542	inf	#NAME?	0.0031	0.019515	yes
BnaA03g12530D	chrA03:5724780-5727464	Purple	Green	OK	0	3.43998	inf	#NAME?	5e-05	0.000600056	yes
BnaA03g12800D	chrA03:5812788-5814566	Purple	Green	OK	1.30175	7.01626	2.43025	2.56558	0.00425	0.0251261	yes
BnaA03g13040D	chrA03:5930443-5939596	Purple	Green	OK	2.46489	0.607321	-2.02099	-2.58867	0.00195	0.013518	yes
BnaA03g14140D	chrA03:6496009-6496878	Purple	Green	OK	495.321	0	#NAME?	#NAME?	5e-05	0.000600056	yes
BnaA03g14150D	chrA03:6498453-6499583	Purple	Green	OK	15.6194	0	#NAME?	#NAME?	5e-05	0.000600056	yes
BnaA03g14180D	chrA03:6506114-6508166	Purple	Green	OK	3.00659	0	#NAME?	#NAME?	5e-05	0.000600056	yes
BnaA03g14210D	chrA03:6518590-6521288	Purple	Green	OK	9.35668	0.695965	-3.74891	-4.48098	0.0001	0.0011169	yes
BnaA03g14500D	chrA03:6674919-6675665	Purple	Green	OK	4.98347	0	#NAME?	#NAME?	5e-05	0.000600056	yes
BnaA03g14700D	chrA03:6757171-6759202	Purple	Green	OK	0.687841	6.3793	3.21325	3.20696	0.0019	0.0132805	yes
BnaA03g14770D	chrA03:6786400-6788895	Purple	Green	OK	1.97463	0	#NAME?	#NAME?	5e-05	0.000600056	yes
BnaA03g14790D	chrA03:6799744-6801571	Purple	Green	OK	0	2.3558	inf	#NAME?	5e-05	0.000600056	yes
BnaA03g14860D	chrA03:6855099-6857359	Purple	Green	OK	0	11.3145	inf	#NAME?	5e-05	0.000600056	yes
BnaA03g15030D	chrA03:6929075-6936999	Purple	Green	OK	0.328617	3.28253	3.32033	3.50496	0.0004	0.0036951	yes
BnaA03g15060D	chrA03:6943832-6948632	Purple	Green	OK	0	4.51397	inf	#NAME?	5e-05	0.000600056	yes
BnaA03g15610D	chrA03:7219028-7219562	Purple	Green	OK	42.5261	0	#NAME?	#NAME?	5e-05	0.000600056	yes
BnaA03g15800D	chrA03:7315436-7321449	Purple	Green	OK	0.297634	3.20763	3.4299	3.5333	0.00055	0.00481964	yes
BnaA03g16060D	chrA03:7452749-7457678	Purple	Green	OK	5.78181	2.15746	-1.42219	-2.39205	0.0017	0.0121475	yes
BnaA03g16360D	chrA03:7638561-7640527	Purple	Green	OK	6.22841	1.94019	-1.68267	-2.0744	0.00925	0.0462644	yes
BnaA03g16590D	chrA03:7742136-7743846	Purple	Green	OK	0	2.22723	inf	#NAME?	5e-05	0.000600056	yes
BnaA03g17080D	chrA03:8020339-8021636	Purple	Green	OK	6.1917	25.1614	2.0228	3.07819	0.0005	0.00447196	yes
BnaA03g17100D	chrA03:8025733-8028353	Purple	Green	OK	10.6221	44.3881	2.0631	3.70109	5e-05	0.000600056	yes
BnaA03g17280D	chrA03:8104184-8104496	Purple	Green	OK	72.3639	0	#NAME?	#NAME?	5e-05	0.000600056	yes
BnaA03g17310D	chrA03:8116738-8120050	Purple	Green	OK	47.8649	188.226	1.97543	3.38775	5e-05	0.000600056	yes
BnaA03g17330D	chrA03:8127603-8128647	Purple	Green	OK	2.56809	0	#NAME?	#NAME?	5e-05	0.000600056	yes
BnaA03g17490D	chrA03:8216805-8217549	Purple	Green	OK	9.66334	1.32116	-2.87072	-2.82387	0.00485	0.0277867	yes
BnaA03g17560D	chrA03:8251009-8252413	Purple	Green	OK	20.251	47.2853	1.2234	2.1845	0.003	0.0190614	yes
BnaA03g18080D	chrA03:8500384-8501854	Purple	Green	OK	16.4363	3.05486	-2.42771	-3.28715	0.00015	0.00159108	yes
BnaA03g18090D	chrA03:8502417-8505545	Purple	Green	OK	0.739672	3.41936	2.20877	2.35016	0.0076	0.0398069	yes
BnaA03g18370D	chrA03:8623783-8624488	Purple	Green	OK	8.7874	0	#NAME?	#NAME?	5e-05	0.000600056	yes
BnaA03g18410D	chrA03:8640785-8645874	Purple	Green	OK	6.39526	12.5144	0.968509	1.83522	0.0095	0.0472055	yes
BnaA03g18540D	chrA03:8726069-8728057	Purple	Green	OK	156.712	10.0832	-3.95808	-5.47735	5e-05	0.000600056	yes
BnaA03g18630D	chrA03:8752794-8753761	Purple	Green	OK	11.7022	27.2206	1.21791	1.94843	0.00955	0.0474025	yes
BnaA03g18690D	chrA03:8790609-8791771	Purple	Green	OK	3.03628	0	#NAME?	#NAME?	5e-05	0.000600056	yes
BnaA03g18710D	chrA03:8804396-8806747	Purple	Green	OK	5.31622	105.265	4.30748	7.17397	5e-05	0.000600056	yes
BnaA03g18750D	chrA03:8822847-8825776	Purple	Green	OK	0	3.87557	inf	#NAME?	5e-05	0.000600056	yes
BnaA03g19220D	chrA03:9090522-9091733	Purple	Green	OK	1.80338	0	#NAME?	#NAME?	5e-05	0.000600056	yes
BnaA03g19410D	chrA03:9195032-9196268	Purple	Green	OK	3.20537	0	#NAME?	#NAME?	5e-05	0.000600056	yes
BnaA03g19510D	chrA03:9237832-9239443	Purple	Green	OK	49.4351	0.813767	-5.92478	-5.53184	0.0048	0.0275396	yes
BnaA03g19630D	chrA03:9305275-9308262	Purple	Green	OK	28.3191	0	#NAME?	#NAME?	5e-05	0.000600056	yes
BnaA03g19990D	chrA03:9513383-9514184	Purple	Green	OK	42.2347	189.348	2.16454	4.12804	5e-05	0.000600056	yes
BnaA03g20150D	chrA03:9588690-9593831	Purple	Green	OK	2.87534	0	#NAME?	#NAME?	5e-05	0.000600056	yes
BnaA03g20360D	chrA03:9702574-9706091	Purple	Green	OK	1.13346	3.70577	1.70904	2.07065	0.0074	0.0389694	yes
BnaA03g20590D	chrA03:9777212-9778957	Purple	Green	OK	4.82684	0	#NAME?	#NAME?	5e-05	0.000600056	yes
BnaA03g20740D	chrA03:9832860-9833289	Purple	Green	OK	4.66939	0	#NAME?	#NAME?	5e-05	0.000600056	yes
BnaA03g20830D	chrA03:9867950-9869752	Purple	Green	OK	1.74093	7.51402	2.10973	2.7141	0.00185	0.0130048	yes
BnaA03g21090D	chrA03:9986719-9987555	Purple	Green	OK	3.76661	0	#NAME?	#NAME?	0.0009	0.00726139	yes
BnaA03g21690D	chrA03:10263569-10266471	Purple	Green	OK	4.50119	0	#NAME?	#NAME?	5e-05	0.000600056	yes
BnaA03g21770D	chrA03:10287518-10287899	Purple	Green	OK	10.9858	0	#NAME?	#NAME?	5e-05	0.000600056	yes
BnaA03g21800D	chrA03:10297566-10299849	Purple	Green	OK	28.1026	0	#NAME?	#NAME?	5e-05	0.000600056	yes
BnaA03g22000D	chrA03:10409328-10410482	Purple	Green	OK	32.6572	6.92273	-2.23799	-3.45467	0.0002	0.00205349	yes
BnaA03g22260D	chrA03:10576173-10578506	Purple	Green	OK	5.29565	16.7078	1.65764	2.99266	0.0003	0.00287919	yes
BnaA03g23840D	chrA03:11436410-11438175	Purple	Green	OK	9.4469	35.6239	1.91493	3.34363	0.0001	0.0011169	yes
BnaA03g23870D	chrA03:11444063-11444550	Purple	Green	OK	0	51.3044	inf	#NAME?	5e-05	0.000600056	yes
BnaA03g23880D	chrA03:11450896-11455054	Purple	Green	OK	0	6.7163	inf	#NAME?	5e-05	0.000600056	yes
BnaA03g23950D	chrA03:11485822-11487007	Purple	Green	OK	2.59258	0	#NAME?	#NAME?	5e-05	0.000600056	yes
BnaA03g24090D	chrA03:11586452-11587157	Purple	Green	OK	1.2715	8.67037	2.76957	2.54709	0.00725	0.0383054	yes
BnaA03g24130D	chrA03:11599305-11602184	Purple	Green	OK	6.38601	15.4585	1.27541	2.3382	0.0021	0.0143469	yes
BnaA03g24410D	chrA03:11752617-11758694	Purple	Green	OK	3.94807	13.9621	1.8223	2.44717	0.0022	0.014881	yes
BnaA03g24520D	chrA03:11804147-11809415	Purple	Green	OK	8.42705	3.69418	-1.18977	-1.9087	0.00755	0.0396162	yes
BnaA03g24580D	chrA03:11832396-11833065	Purple	Green	OK	0	179.806	inf	#NAME?	5e-05	0.000600056	yes
BnaA03g24620D	chrA03:11867640-11869129	Purple	Green	OK	2.8663	0	#NAME?	#NAME?	5e-05	0.000600056	yes
BnaA03g25060D	chrA03:12086290-12088269	Purple	Green	OK	0.872291	17.1425	4.29663	5.1413	5e-05	0.000600056	yes
BnaA03g25230D	chrA03:12197612-12198413	Purple	Green	OK	0	3.47206	inf	#NAME?	0.0012	0.00912598	yes
BnaA03g25380D	chrA03:12265799-12270416	Purple	Green	OK	2.19258	9.54218	2.12169	3.56913	5e-05	0.000600056	yes
BnaA03g25540D	chrA03:12398639-12399764	Purple	Green	OK	3.89873	0	#NAME?	#NAME?	5e-05	0.000600056	yes
BnaA03g25580D	chrA03:12426788-12427478	Purple	Green	OK	51.4731	0	#NAME?	#NAME?	5e-05	0.000600056	yes
BnaA03g25710D	chrA03:12541089-12542207	Purple	Green	OK	4.48969	0	#NAME?	#NAME?	5e-05	0.000600056	yes
BnaA03g26360D	chrA03:12905190-12912103	Purple	Green	OK	3.33107	0.797328	-2.06274	-2.87001	0.00055	0.00481964	yes
BnaA03g26540D	chrA03:12993671-12998993	Purple	Green	OK	1.13798	3.52803	1.63239	2.35192	0.00195	0.013518	yes
BnaA03g26810D	chrA03:13189940-13195309	Purple	Green	OK	1.37137	5.63188	2.038	2.42367	0.00495	0.0282838	yes
BnaA03g27530D	chrA03:13550469-13552024	Purple	Green	OK	5.09263	16.226	1.67183	2.32642	0.0079	0.0410296	yes
BnaA03g27620D	chrA03:13574568-13577127	Purple	Green	OK	6.60521	2.16498	-1.60925	-2.20322	0.0046	0.0266738	yes
BnaA03g27670D	chrA03:13601029-13603053	Purple	Green	OK	3.02917	0	#NAME?	#NAME?	0.00025	0.0024567	yes
BnaA03g27710D	chrA03:13610721-13611833	Purple	Green	OK	4.7007	20.5575	2.12871	2.35013	0.0055	0.0308006	yes
BnaA03g27780D	chrA03:13640902-13642397	Purple	Green	OK	0	2.29768	inf	#NAME?	5e-05	0.000600056	yes
BnaA03g28050D	chrA03:13726358-13728064	Purple	Green	OK	2.40544	0	#NAME?	#NAME?	5e-05	0.000600056	yes
BnaA03g28090D	chrA03:13737687-13740525	Purple	Green	OK	0.48449	6.7972	3.8104	4.63174	0.00025	0.0024567	yes
BnaA03g28360D	chrA03:13823214-13828004	Purple	Green	OK	3.93549	1.05106	-1.9047	-2.36701	0.0014	0.0103858	yes
BnaA03g28390D	chrA03:13862280-13865324	Purple	Green	OK	1.12798	4.68401	2.054	2.65613	0.0017	0.0121475	yes
BnaA03g28440D	chrA03:13886614-13889360	Purple	Green	OK	4.06117	0.889545	-2.19075	-2.70861	0.00145	0.0107096	yes
BnaA03g28620D	chrA03:13963092-13965588	Purple	Green	OK	10.1447	28.3038	1.48028	2.59996	0.00075	0.00624773	yes
BnaA03g28700D	chrA03:13989383-13990598	Purple	Green	OK	3.98071	0	#NAME?	#NAME?	5e-05	0.000600056	yes
BnaA03g28810D	chrA03:14028484-14031043	Purple	Green	OK	2.26963	0	#NAME?	#NAME?	5e-05	0.000600056	yes
BnaA03g29070D	chrA03:14134445-14134916	Purple	Green	OK	24.7823	124.82	2.33246	4.20575	0.0006	0.00517851	yes
BnaA03g29090D	chrA03:14138349-14139479	Purple	Green	OK	10.4527	52.9518	2.34081	3.66452	0.00015	0.00159108	yes
BnaA03g29110D	chrA03:14143611-14144992	Purple	Green	OK	1.50182	13.2534	3.14157	3.23545	0.0011	0.00852321	yes
BnaA03g29270D	chrA03:14229926-14232907	Purple	Green	OK	5.13022	1.19072	-2.10719	-2.64996	0.00155	0.0112947	yes
BnaA03g29370D	chrA03:14289284-14291169	Purple	Green	OK	10.72	1.55269	-2.78746	-2.95253	0.0013	0.00977745	yes
BnaA03g30440D	chrA03:14778028-14781520	Purple	Green	OK	0	21.2116	inf	#NAME?	5e-05	0.000600056	yes
BnaA03g30860D	chrA03:14933561-14936393	Purple	Green	OK	0	2.07011	inf	#NAME?	5e-05	0.000600056	yes
BnaA03g31490D	chrA03:15207945-15208260	Purple	Green	OK	14.17	0	#NAME?	#NAME?	5e-05	0.000600056	yes
BnaA03g31870D	chrA03:15395463-15397185	Purple	Green	OK	31.3434	11.2268	-1.48121	-2.16207	0.00265	0.0173394	yes
BnaA03g31900D	chrA03:15403727-15408893	Purple	Green	OK	1.96084	0	#NAME?	#NAME?	5e-05	0.000600056	yes
BnaA03g32040D	chrA03:15469215-15471616	Purple	Green	OK	27.3744	52.0186	0.926199	1.85643	0.0093	0.0464565	yes
BnaA03g32240D	chrA03:15562306-15563389	Purple	Green	OK	6.61124	0	#NAME?	#NAME?	5e-05	0.000600056	yes
BnaA03g32280D	chrA03:15575379-15578923	Purple	Green	OK	31.4565	0.932818	-5.07562	-5.43792	5e-05	0.000600056	yes
BnaA03g32670D	chrA03:15776976-15778073	Purple	Green	OK	8.40049	42.1689	2.32763	3.3295	5e-05	0.000600056	yes
BnaA03g32820D	chrA03:15845984-15848133	Purple	Green	OK	4.09513	0	#NAME?	#NAME?	5e-05	0.000600056	yes
BnaA03g33070D	chrA03:16009409-16012725	Purple	Green	OK	2.04787	5.51597	1.42949	1.99038	0.0094	0.0468393	yes
BnaA03g33300D	chrA03:16102193-16104497	Purple	Green	OK	5.95929	0.352705	-4.07861	-3.83125	0.0012	0.00912598	yes
BnaA03g33370D	chrA03:16141665-16143825	Purple	Green	OK	2.58475	32.8045	3.6658	4.85423	5e-05	0.000600056	yes
BnaA03g34110D	chrA03:16580705-16582024	Purple	Green	OK	64.2311	210.15	1.71007	3.04617	0.0001	0.0011169	yes
BnaA03g34510D	chrA03:16792275-16793457	Purple	Green	OK	43.0796	0	#NAME?	#NAME?	5e-05	0.000600056	yes
BnaA03g34550D	chrA03:16805367-16808762	Purple	Green	OK	4.74557	0	#NAME?	#NAME?	5e-05	0.000600056	yes
BnaA03g34680D	chrA03:16863303-16866366	Purple	Green	OK	2.2197	0	#NAME?	#NAME?	5e-05	0.000600056	yes
BnaA03g34780D	chrA03:16906558-16908478	Purple	Green	OK	8.98398	1.84656	-2.28252	-2.71437	0.00205	0.0140984	yes
BnaA03g34790D	chrA03:16964586-16966086	Purple	Green	OK	4.86061	13.9972	1.52592	2.32683	0.0061	0.0335223	yes
BnaA03g34930D	chrA03:17042409-17043193	Purple	Green	OK	0	18.9426	inf	#NAME?	5e-05	0.000600056	yes
BnaA03g34940D	chrA03:17045166-17045817	Purple	Green	OK	0	2.02104	inf	#NAME?	5e-05	0.000600056	yes
BnaA03g35020D	chrA03:17099629-17101674	Purple	Green	OK	0	2.00008	inf	#NAME?	5e-05	0.000600056	yes
BnaA03g35750D	chrA03:17470467-17472578	Purple	Green	OK	0	2.71015	inf	#NAME?	5e-05	0.000600056	yes
BnaA03g36010D	chrA03:17609214-17609535	Purple	Green	OK	4.86614	0	#NAME?	#NAME?	0.0006	0.00517851	yes
BnaA03g36030D	chrA03:17617000-17619423	Purple	Green	OK	2.65887	0	#NAME?	#NAME?	5e-05	0.000600056	yes
BnaA03g36100D	chrA03:17650600-17651111	Purple	Green	OK	107.156	0	#NAME?	#NAME?	5e-05	0.000600056	yes
BnaA03g36460D	chrA03:17854825-17856226	Purple	Green	OK	3.83298	0	#NAME?	#NAME?	5e-05	0.000600056	yes
BnaA03g36560D	chrA03:17956529-17956937	Purple	Green	OK	7.58	0	#NAME?	#NAME?	0.00015	0.00159108	yes
BnaA03g36650D	chrA03:18017874-18018312	Purple	Green	OK	0	1.80095	inf	#NAME?	0.0047	0.0271408	yes
BnaA03g36950D	chrA03:18202787-18204637	Purple	Green	OK	8.02475	41.6125	2.37449	3.55608	0.00015	0.00159108	yes
BnaA03g37290D	chrA03:18474534-18476775	Purple	Green	OK	2.95614	9.88486	1.74151	2.65709	0.0006	0.00517851	yes
BnaA03g37810D	chrA03:18815585-18816356	Purple	Green	OK	0	6.79456	inf	#NAME?	5e-05	0.000600056	yes
BnaA03g37950D	chrA03:18855417-18856889	Purple	Green	OK	0	2.05206	inf	#NAME?	5e-05	0.000600056	yes
BnaA03g37970D	chrA03:18866896-18869803	Purple	Green	OK	0	2.30533	inf	#NAME?	5e-05	0.000600056	yes
BnaA03g38180D	chrA03:18972238-18973992	Purple	Green	OK	0	12.1022	inf	#NAME?	5e-05	0.000600056	yes
BnaA03g38250D	chrA03:19006856-19008518	Purple	Green	OK	0	12.0844	inf	#NAME?	5e-05	0.000600056	yes
BnaA03g38340D	chrA03:19053340-19054879	Purple	Green	OK	0.684876	5.95661	3.12058	2.92681	0.00405	0.0242071	yes
BnaA03g38740D	chrA03:19245819-19247052	Purple	Green	OK	10.5751	0	#NAME?	#NAME?	5e-05	0.000600056	yes
BnaA03g39170D	chrA03:19521746-19525177	Purple	Green	OK	10.1391	4.06396	-1.31897	-2.08445	0.00525	0.0296335	yes
BnaA03g39320D	chrA03:19601088-19602027	Purple	Green	OK	9.51195	0	#NAME?	#NAME?	5e-05	0.000600056	yes
BnaA03g39340D	chrA03:19602287-19602937	Purple	Green	OK	9.71142	0	#NAME?	#NAME?	5e-05	0.000600056	yes
BnaA03g39590D	chrA03:19738659-19740849	Purple	Green	OK	3.53082	13.7482	1.96117	2.79991	0.0008	0.00659907	yes
BnaA03g39600D	chrA03:19741375-19757827	Purple	Green	OK	4.73933	2.47682	-0.936192	-1.86835	0.00685	0.0366756	yes
BnaA03g39650D	chrA03:19787639-19789531	Purple	Green	OK	0	40.1914	inf	#NAME?	5e-05	0.000600056	yes
BnaA03g39790D	chrA03:19855625-19857016	Purple	Green	OK	15.4499	1.77413	-3.12241	-3.60833	0.0003	0.00287919	yes
BnaA03g39840D	chrA03:19904922-19911257	Purple	Green	OK	3.28153	0.929861	-1.81928	-2.68916	0.0018	0.0127202	yes
BnaA03g39990D	chrA03:19973413-19974223	Purple	Green	OK	101.636	2.49873	-5.34607	-5.57871	0.0023	0.0154433	yes
BnaA03g40000D	chrA03:19987087-19990416	Purple	Green	OK	2.1983	0.655553	-1.74561	-2.02663	0.01025	0.0499185	yes
BnaA03g40170D	chrA03:20057718-20059404	Purple	Green	OK	6.59488	36.9069	2.48447	3.82588	5e-05	0.000600056	yes
BnaA03g41520D	chrA03:20841729-20842838	Purple	Green	OK	7.59582	0	#NAME?	#NAME?	5e-05	0.000600056	yes
BnaA03g41630D	chrA03:20915693-20915906	Purple	Green	OK	0	19.4993	inf	#NAME?	0.00015	0.00159108	yes
BnaA03g41900D	chrA03:21050091-21054272	Purple	Green	OK	111.027	26.5836	-2.06231	-3.95386	5e-05	0.000600056	yes
BnaA03g42540D	chrA03:21328795-21329338	Purple	Green	OK	12.8441	0	#NAME?	#NAME?	5e-05	0.000600056	yes
BnaA03g42750D	chrA03:21437701-21442904	Purple	Green	OK	112.786	6.80088	-4.05172	-6.31896	5e-05	0.000600056	yes
BnaA03g42810D	chrA03:21485363-21489232	Purple	Green	OK	9.11625	4.18367	-1.12367	-1.95735	0.0068	0.0364871	yes
BnaA03g42870D	chrA03:21528380-21528935	Purple	Green	OK	11.8683	97.9661	3.04517	5.43757	5e-05	0.000600056	yes
BnaA03g42950D	chrA03:21566120-21568314	Purple	Green	OK	5.65196	0	#NAME?	#NAME?	5e-05	0.000600056	yes
BnaA03g43300D	chrA03:21737960-21740485	Purple	Green	OK	2.30242	6.52372	1.50255	2.08961	0.00695	0.0370809	yes
BnaA03g43370D	chrA03:21800407-21801028	Purple	Green	OK	0	2.94231	inf	#NAME?	5e-05	0.000600056	yes
BnaA03g44280D	chrA03:22457265-22458839	Purple	Green	OK	1.77936	0	#NAME?	#NAME?	5e-05	0.000600056	yes
BnaA03g44780D	chrA03:22761125-22765183	Purple	Green	OK	3.88197	1.16378	-1.73797	-2.24945	0.005	0.0285136	yes
BnaA03g45240D	chrA03:23008881-23013901	Purple	Green	OK	5.99241	0.466459	-3.68332	-4.09128	0.00025	0.0024567	yes
BnaA03g45280D	chrA03:23033899-23034899	Purple	Green	OK	10.1144	0	#NAME?	#NAME?	5e-05	0.000600056	yes
BnaA03g45300D	chrA03:23039329-23040165	Purple	Green	OK	0	3.97921	inf	#NAME?	5e-05	0.000600056	yes
BnaA03g45610D	chrA03:23215313-23216655	Purple	Green	OK	5.76809	0.625687	-3.20458	-2.64992	0.00505	0.028768	yes
BnaA03g45670D	chrA03:23261351-23265843	Purple	Green	OK	0.205381	1.88296	3.19663	2.84527	0.00885	0.0448517	yes
BnaA03g46170D	chrA03:23636949-23637562	Purple	Green	OK	68.0999	2.5381	-4.74583	-5.05151	0.001	0.00787399	yes
BnaA03g46180D	chrA03:23647028-23647675	Purple	Green	OK	1.96285	0	#NAME?	#NAME?	0.0025	0.0165232	yes
BnaA03g46290D	chrA03:23730030-23732840	Purple	Green	OK	12.9098	0	#NAME?	#NAME?	5e-05	0.000600056	yes
BnaA03g46660D	chrA03:23955243-23957868	Purple	Green	OK	3.07541	9.30136	1.59666	2.58333	0.0015	0.0110332	yes
BnaA03g46780D	chrA03:23990888-23993496	Purple	Green	OK	6.3562	0	#NAME?	#NAME?	5e-05	0.000600056	yes
BnaA03g46790D	chrA03:23995498-23996666	Purple	Green	OK	4.09246	0	#NAME?	#NAME?	5e-05	0.000600056	yes
BnaA03g46820D	chrA03:24011866-24013099	Purple	Green	OK	1.7021	0	#NAME?	#NAME?	0.0004	0.0036951	yes
BnaA03g46910D	chrA03:24051633-24053073	Purple	Green	OK	0	43.8016	inf	#NAME?	5e-05	0.000600056	yes
BnaA03g46970D	chrA03:24088084-24090665	Purple	Green	OK	7.61486	0.473512	-4.00734	-3.72296	0.0023	0.0154433	yes
BnaA03g47020D	chrA03:24116870-24121682	Purple	Green	OK	4.1259	0	#NAME?	#NAME?	5e-05	0.000600056	yes
BnaA03g47070D	chrA03:24137991-24141797	Purple	Green	OK	3.75532	0	#NAME?	#NAME?	5e-05	0.000600056	yes
BnaA03g47450D	chrA03:24341358-24342639	Purple	Green	OK	6.12318	0	#NAME?	#NAME?	5e-05	0.000600056	yes
BnaA03g47500D	chrA03:24373965-24375915	Purple	Green	OK	0	4.40702	inf	#NAME?	5e-05	0.000600056	yes
BnaA03g47580D	chrA03:24416165-24421581	Purple	Green	OK	7.23155	0.494113	-3.87139	-3.87809	0.0011	0.00852321	yes
BnaA03g47600D	chrA03:24428219-24431859	Purple	Green	OK	12.6036	6.05099	-1.05859	-2.04584	0.0053	0.0298737	yes
BnaA03g47820D	chrA03:24560729-24562932	Purple	Green	OK	0	4.03002	inf	#NAME?	5e-05	0.000600056	yes
BnaA03g47990D	chrA03:24680892-24681861	Purple	Green	OK	0	2.51709	inf	#NAME?	5e-05	0.000600056	yes
BnaA03g48100D	chrA03:24711882-24713192	Purple	Green	OK	0	1.89466	inf	#NAME?	0.0005	0.00447196	yes
BnaA03g48430D	chrA03:24864811-24866077	Purple	Green	OK	231.09	868.752	1.91049	3.16124	0.0002	0.00205349	yes
BnaA03g48450D	chrA03:24868819-24870477	Purple	Green	OK	27.0626	83.824	1.63106	2.97418	0.0013	0.00977745	yes
BnaA03g48590D	chrA03:24921409-24921589	Purple	Green	OK	35.0814	0	#NAME?	#NAME?	0.00055	0.00481964	yes
BnaA03g48640D	chrA03:24937545-24939738	Purple	Green	OK	12.3634	3.30612	-1.90286	-2.80248	5e-05	0.000600056	yes
BnaA03g48810D	chrA03:25046515-25047845	Purple	Green	OK	2.31738	0	#NAME?	#NAME?	5e-05	0.000600056	yes
BnaA03g48960D	chrA03:25166544-25167980	Purple	Green	OK	4.14785	0	#NAME?	#NAME?	5e-05	0.000600056	yes
BnaA03g48990D	chrA03:25172062-25179971	Purple	Green	OK	2.85772	0.27382	-3.38357	-4.15419	0.0003	0.00287919	yes
BnaA03g49110D	chrA03:25265812-25267140	Purple	Green	OK	0	1.71012	inf	#NAME?	5e-05	0.000600056	yes
BnaA03g49250D	chrA03:25378961-25382374	Purple	Green	OK	31.973	5.14794	-2.63479	-4.24333	5e-05	0.000600056	yes
BnaA03g50640D	chrA03:26273858-26275149	Purple	Green	OK	0	5.95263	inf	#NAME?	5e-05	0.000600056	yes
BnaA03g51730D	chrA03:26908228-26908828	Purple	Green	OK	33.4666	11.2015	-1.57903	-2.2796	0.0035	0.0215341	yes
BnaA03g52000D	chrA03:27082166-27084124	Purple	Green	OK	0	1.94292	inf	#NAME?	5e-05	0.000600056	yes
BnaA03g52010D	chrA03:27086778-27088628	Purple	Green	OK	32.3485	10.0102	-1.69223	-3.15385	5e-05	0.000600056	yes
BnaA03g52090D	chrA03:27128236-27129671	Purple	Green	OK	5.18727	0.966743	-2.42377	-2.43703	0.0084	0.0430406	yes
BnaA03g52610D	chrA03:27443011-27445325	Purple	Green	OK	5.60653	0.889749	-2.65564	-3.09756	0.001	0.00787399	yes
BnaA03g52920D	chrA03:27631824-27632286	Purple	Green	OK	0	4.17618	inf	#NAME?	5e-05	0.000600056	yes
BnaA03g53000D	chrA03:27696561-27697652	Purple	Green	OK	0	53.9929	inf	#NAME?	5e-05	0.000600056	yes
BnaA03g53020D	chrA03:27720027-27722817	Purple	Green	OK	33.8532	15.2769	-1.14795	-2.15975	0.00345	0.0212673	yes
BnaA03g53290D	chrA03:27965376-27967297	Purple	Green	OK	2.44675	0	#NAME?	#NAME?	5e-05	0.000600056	yes
BnaA03g53350D	chrA03:27996851-27997322	Purple	Green	OK	56.6613	0	#NAME?	#NAME?	5e-05	0.000600056	yes
BnaA03g53440D	chrA03:28039597-28041864	Purple	Green	OK	1.85127	0	#NAME?	#NAME?	5e-05	0.000600056	yes
BnaA03g53930D	chrA03:28473364-28475435	Purple	Green	OK	5.97864	1.27322	-2.23134	-2.63634	0.00145	0.0107096	yes
BnaA03g54150D	chrA03:28662173-28663565	Purple	Green	OK	1.68345	0	#NAME?	#NAME?	5e-05	0.000600056	yes
BnaA03g54530D	chrA03:29281487-29282278	Purple	Green	OK	0	21.9258	inf	#NAME?	5e-05	0.000600056	yes
BnaA03g55200D	chrA03_random:201632-206043	Purple	Green	OK	1.8466	0.361149	-2.3542	-2.50593	0.00475	0.0273163	yes
BnaA03g55550D	chrA03_random:327102-328637	Purple	Green	OK	23.3164	0	#NAME?	#NAME?	5e-05	0.000600056	yes
BnaA03g55560D	chrA03_random:329327-331327	Purple	Green	OK	3.63291	0	#NAME?	#NAME?	5e-05	0.000600056	yes
BnaA03g55640D	chrA03_random:357586-358701	Purple	Green	OK	58.4278	17.2195	-1.76261	-2.8296	0.0003	0.00287919	yes
BnaA03g55910D	chrA03_random:476768-478769	Purple	Green	OK	0	2.17775	inf	#NAME?	5e-05	0.000600056	yes
BnaA03g55930D	chrA03_random:483721-485251	Purple	Green	OK	18.9981	45.6795	1.26569	2.36789	0.0019	0.0132805	yes
BnaA03g56080D	chrA03_random:536017-536653	Purple	Green	OK	4.36205	401.252	6.52336	8.26408	5e-05	0.000600056	yes
BnaA03g56750D	chrA03_random:858994-859666	Purple	Green	OK	3.58116	32.1629	3.1669	3.23159	0.00265	0.0173394	yes
BnaA03g57330D	chrA03_random:1099283-1099724	Purple	Green	OK	5.85817	0	#NAME?	#NAME?	5e-05	0.000600056	yes
BnaA03g57530D	chrA03_random:1210286-1211880	Purple	Green	OK	11.5745	60.6151	2.38873	4.10273	5e-05	0.000600056	yes
BnaA03g57740D	chrA03_random:1296025-1298812	Purple	Green	OK	16.9478	7.05699	-1.26397	-2.08607	0.0025	0.0165232	yes
BnaA03g57860D	chrA03_random:1348975-1350454	Purple	Green	OK	8.67719	28.8593	1.73374	2.93888	0.0001	0.0011169	yes
BnaA03g57920D	chrA03_random:1371748-1373989	Purple	Green	OK	23.3477	10.3929	-1.16768	-2.09417	0.0051	0.0290219	yes
BnaA03g58060D	chrA03_random:1478360-1479005	Purple	Green	OK	0	2.65022	inf	#NAME?	5e-05	0.000600056	yes
BnaA03g58190D	chrA03_random:1565558-1568502	Purple	Green	OK	3.80414	0	#NAME?	#NAME?	5e-05	0.000600056	yes
BnaA03g58350D	chrA03_random:1644785-1645115	Purple	Green	OK	9.58624	0	#NAME?	#NAME?	5e-05	0.000600056	yes
BnaA03g58370D	chrA03_random:1657440-1658224	Purple	Green	OK	54.3576	0	#NAME?	#NAME?	5e-05	0.000600056	yes
BnaA03g59010D	chrA03_random:2077093-2078389	Purple	Green	OK	0	7.21471	inf	#NAME?	5e-05	0.000600056	yes
BnaA03g60230D	chrA03_random:4691329-4692447	Purple	Green	OK	2.13799	12.0515	2.49488	2.69745	0.0038	0.0229828	yes
BnaA04g00060D	chrA04:36861-38524	Purple	Green	OK	2.84672	9.28011	1.70484	2.16847	0.0076	0.0398069	yes
BnaA04g00110D	chrA04:56776-58403	Purple	Green	OK	8.24201	97.6738	3.5669	6.23929	5e-05	0.000600056	yes
BnaA04g00410D	chrA04:241064-243883	Purple	Green	OK	6.53957	15.5397	1.24869	2.20545	0.00275	0.0178263	yes
BnaA04g00660D	chrA04:488056-489279	Purple	Green	OK	36.2456	310.429	3.09839	5.63189	5e-05	0.000600056	yes
BnaA04g01110D	chrA04:724376-725284	Purple	Green	OK	0	2.35981	inf	#NAME?	0.00105	0.00819322	yes
BnaA04g01120D	chrA04:726077-729193	Purple	Green	OK	0	3.7618	inf	#NAME?	5e-05	0.000600056	yes
BnaA04g01570D	chrA04:1029700-1030356	Purple	Green	OK	0	7.89667	inf	#NAME?	5e-05	0.000600056	yes
BnaA04g03560D	chrA04:2430256-2432319	Purple	Green	OK	0	1.6699	inf	#NAME?	0.0001	0.0011169	yes
BnaA04g03590D	chrA04:2451039-2452888	Purple	Green	OK	0	46.0029	inf	#NAME?	5e-05	0.000600056	yes
BnaA04g03880D	chrA04:2744714-2745949	Purple	Green	OK	0	3.61341	inf	#NAME?	5e-05	0.000600056	yes
BnaA04g06290D	chrA04:4860496-4865004	Purple	Green	OK	0	2.4391	inf	#NAME?	5e-05	0.000600056	yes
BnaA04g06300D	chrA04:4873564-4875523	Purple	Green	OK	0	15.1868	inf	#NAME?	5e-05	0.000600056	yes
BnaA04g06420D	chrA04:5053378-5054985	Purple	Green	OK	4.1524	44.7413	3.42959	5.62946	5e-05	0.000600056	yes
BnaA04g06460D	chrA04:5074467-5076473	Purple	Green	OK	0	7.64731	inf	#NAME?	5e-05	0.000600056	yes
BnaA04g06990D	chrA04:5704042-5706396	Purple	Green	OK	5.57333	16.379	1.55524	2.66786	0.00035	0.00329203	yes
BnaA04g07760D	chrA04:6808620-6811323	Purple	Green	OK	4.97086	16.3535	1.71804	2.64411	0.00085	0.00692421	yes
BnaA04g07950D	chrA04:6927570-6931255	Purple	Green	OK	6.24065	2.00972	-1.6347	-2.46547	0.00165	0.0118456	yes
BnaA04g08240D	chrA04:7298966-7300351	Purple	Green	OK	2.09739	0	#NAME?	#NAME?	5e-05	0.000600056	yes
BnaA04g08250D	chrA04:7300445-7300969	Purple	Green	OK	0	9.1618	inf	#NAME?	0.0001	0.0011169	yes
BnaA04g08280D	chrA04:7349301-7350832	Purple	Green	OK	7.57895	35.5923	2.23149	3.03026	0.00035	0.00329203	yes
BnaA04g08310D	chrA04:7408306-7409766	Purple	Green	OK	0	2.4578	inf	#NAME?	5e-05	0.000600056	yes
BnaA04g08360D	chrA04:7444974-7447781	Purple	Green	OK	8.45559	20.0565	1.24609	1.98542	0.0089	0.0450125	yes
BnaA04g08620D	chrA04:7616935-7617683	Purple	Green	OK	1.89646	0	#NAME?	#NAME?	0.001	0.00787399	yes
BnaA04g08710D	chrA04:7739676-7741856	Purple	Green	OK	7.99464	0.944176	-3.0819	-3.28025	0.0006	0.00517851	yes
BnaA04g09120D	chrA04:8195190-8196210	Purple	Green	OK	0	2.2556	inf	#NAME?	5e-05	0.000600056	yes
BnaA04g09170D	chrA04:8231984-8233204	Purple	Green	OK	31.43	0	#NAME?	#NAME?	5e-05	0.000600056	yes
BnaA04g09190D	chrA04:8235943-8236696	Purple	Green	OK	10.2921	0	#NAME?	#NAME?	5e-05	0.000600056	yes
BnaA04g10360D	chrA04:9131570-9134610	Purple	Green	OK	2.57037	0	#NAME?	#NAME?	5e-05	0.000600056	yes
BnaA04g10710D	chrA04:9388755-9389618	Purple	Green	OK	52.5221	235.352	2.16382	4.24774	5e-05	0.000600056	yes
BnaA04g12000D	chrA04:10246267-10247836	Purple	Green	OK	0	1.75046	inf	#NAME?	5e-05	0.000600056	yes
BnaA04g12130D	chrA04:10353158-10354905	Purple	Green	OK	4.63866	14.6133	1.6555	2.4839	0.0019	0.0132805	yes
BnaA04g12790D	chrA04:10803211-10805442	Purple	Green	OK	47.3029	0.829255	-5.83397	-6.23267	5e-05	0.000600056	yes
BnaA04g13070D	chrA04:11012360-11015706	Purple	Green	OK	3.26995	0.421398	-2.95601	-3.26496	0.00105	0.00819322	yes
BnaA04g13090D	chrA04:11019020-11020138	Purple	Green	OK	6.15472	1.01332	-2.6026	-2.43287	0.01015	0.0495444	yes
BnaA04g13140D	chrA04:11053492-11055682	Purple	Green	OK	2.45933	0	#NAME?	#NAME?	5e-05	0.000600056	yes
BnaA04g13230D	chrA04:11151695-11154203	Purple	Green	OK	11.045	0	#NAME?	#NAME?	5e-05	0.000600056	yes
BnaA04g13540D	chrA04:11434573-11435452	Purple	Green	OK	2.00371	0	#NAME?	#NAME?	5e-05	0.000600056	yes
BnaA04g14520D	chrA04:12206675-12207638	Purple	Green	OK	18.1607	0	#NAME?	#NAME?	5e-05	0.000600056	yes
BnaA04g14540D	chrA04:12215268-12218705	Purple	Green	OK	3.12006	0	#NAME?	#NAME?	5e-05	0.000600056	yes
BnaA04g14720D	chrA04:12370379-12371085	Purple	Green	OK	0	4.50129	inf	#NAME?	5e-05	0.000600056	yes
BnaA04g15290D	chrA04:12711733-12712822	Purple	Green	OK	10.6493	0	#NAME?	#NAME?	5e-05	0.000600056	yes
BnaA04g15520D	chrA04:12867286-12873711	Purple	Green	OK	0	3.03082	inf	#NAME?	5e-05	0.000600056	yes
BnaA04g15880D	chrA04:13057409-13057877	Purple	Green	OK	12.4681	0	#NAME?	#NAME?	5e-05	0.000600056	yes
BnaA04g16080D	chrA04:13181833-13183049	Purple	Green	OK	0	5.13238	inf	#NAME?	5e-05	0.000600056	yes
BnaA04g16130D	chrA04:13199636-13203295	Purple	Green	OK	0.984395	4.05744	2.04326	2.22431	0.00745	0.0391877	yes
BnaA04g16190D	chrA04:13246893-13249284	Purple	Green	OK	8.1121	65.7308	3.01842	4.95316	5e-05	0.000600056	yes
BnaA04g16360D	chrA04:13367764-13370066	Purple	Green	OK	0	2.18533	inf	#NAME?	5e-05	0.000600056	yes
BnaA04g16630D	chrA04:13596579-13598352	Purple	Green	OK	2.12982	8.21285	1.94715	2.38863	0.00435	0.0255711	yes
BnaA04g17060D	chrA04:13898796-13900268	Purple	Green	OK	3.04894	0	#NAME?	#NAME?	5e-05	0.000600056	yes
BnaA04g17570D	chrA04:14259873-14261783	Purple	Green	OK	9.4398	3.86331	-1.28892	-1.96413	0.0075	0.0394054	yes
BnaA04g18910D	chrA04:15017287-15017701	Purple	Green	OK	5.54876	0	#NAME?	#NAME?	5e-05	0.000600056	yes
BnaA04g19020D	chrA04:15110458-15115071	Purple	Green	OK	0.934119	4.74393	2.3444	2.92379	0.00285	0.0183337	yes
BnaA04g19410D	chrA04:15302592-15304360	Purple	Green	OK	11.8864	29.1073	1.29206	2.02953	0.00595	0.0327992	yes
BnaA04g19830D	chrA04:15458981-15460126	Purple	Green	OK	7.05454	0	#NAME?	#NAME?	5e-05	0.000600056	yes
BnaA04g20100D	chrA04:15568829-15570909	Purple	Green	OK	0	2.09415	inf	#NAME?	5e-05	0.000600056	yes
BnaA04g20290D	chrA04:15657792-15659389	Purple	Green	OK	5.53194	1.13985	-2.27895	-2.52713	0.0047	0.0271408	yes
BnaA04g20300D	chrA04:15671173-15675279	Purple	Green	OK	14.7165	4.31509	-1.76997	-3.18002	5e-05	0.000600056	yes
BnaA04g20340D	chrA04:15698336-15699530	Purple	Green	OK	20.431	6.74672	-1.5985	-2.15151	0.00375	0.0227491	yes
BnaA04g21150D	chrA04:16144502-16148188	Purple	Green	OK	3.26383	0.55661	-2.55183	-2.97308	0.0014	0.0103858	yes
BnaA04g21230D	chrA04:16185033-16186305	Purple	Green	OK	47.6425	12.8747	-1.88771	-3.35072	5e-05	0.000600056	yes
BnaA04g21240D	chrA04:16186409-16187792	Purple	Green	OK	87.4609	15.6769	-2.48	-4.145	5e-05	0.000600056	yes
BnaA04g21390D	chrA04:16308821-16309802	Purple	Green	OK	3.06066	0	#NAME?	#NAME?	5e-05	0.000600056	yes
BnaA04g21400D	chrA04:16310642-16315995	Purple	Green	OK	5.97809	1.00478	-2.57281	-3.71688	5e-05	0.000600056	yes
BnaA04g21450D	chrA04:16363212-16364898	Purple	Green	OK	87.9677	2.23231	-5.30037	-6.12363	5e-05	0.000600056	yes
BnaA04g21530D	chrA04:16387568-16387880	Purple	Green	OK	0	9.29467	inf	#NAME?	5e-05	0.000600056	yes
BnaA04g22130D	chrA04:16729948-16733413	Purple	Green	OK	2.05367	0	#NAME?	#NAME?	5e-05	0.000600056	yes
BnaA04g22390D	chrA04:16863950-16865891	Purple	Green	OK	0	9.28123	inf	#NAME?	5e-05	0.000600056	yes
BnaA04g22820D	chrA04:17090340-17092059	Purple	Green	OK	0.843468	5.58027	2.72593	2.57956	0.0082	0.0422794	yes
BnaA04g23180D	chrA04:17260565-17262806	Purple	Green	OK	20.194	2.62796	-2.94192	-3.65046	5e-05	0.000600056	yes
BnaA04g23250D	chrA04:17333461-17334324	Purple	Green	OK	25.3923	0	#NAME?	#NAME?	5e-05	0.000600056	yes
BnaA04g23260D	chrA04:17345969-17350393	Purple	Green	OK	6.89239	0	#NAME?	#NAME?	5e-05	0.000600056	yes
BnaA04g23300D	chrA04:17363065-17364731	Purple	Green	OK	1.79391	0	#NAME?	#NAME?	5e-05	0.000600056	yes
BnaA04g23390D	chrA04:17396674-17397814	Purple	Green	OK	3.87862	21.6641	2.48169	2.63315	0.0026	0.0170575	yes
BnaA04g23450D	chrA04:17423851-17425743	Purple	Green	OK	0	2.36611	inf	#NAME?	5e-05	0.000600056	yes
BnaA04g23520D	chrA04:17454552-17455628	Purple	Green	OK	4.61765	0	#NAME?	#NAME?	5e-05	0.000600056	yes
BnaA04g23920D	chrA04:17644877-17645424	Purple	Green	OK	0	16.5157	inf	#NAME?	5e-05	0.000600056	yes
BnaA04g24000D	chrA04:17686719-17691801	Purple	Green	OK	3.31875	7.51891	1.17989	2.12221	0.00295	0.0188296	yes
BnaA04g24050D	chrA04:17722040-17723116	Purple	Green	OK	0	5.75587	inf	#NAME?	5e-05	0.000600056	yes
BnaA04g24160D	chrA04:17769893-17771713	Purple	Green	OK	42.7471	0.601807	-6.15038	-6.17391	0.0007	0.00589401	yes
BnaA04g24360D	chrA04:17849905-17851026	Purple	Green	OK	12.3959	128.346	3.3721	5.94013	5e-05	0.000600056	yes
BnaA04g24420D	chrA04:17873435-17875597	Purple	Green	OK	18.0852	3.05757	-2.56435	-4.22681	5e-05	0.000600056	yes
BnaA04g24630D	chrA04:17970800-17972312	Purple	Green	OK	4.50921	26.8644	2.57475	3.59852	5e-05	0.000600056	yes
BnaA04g24670D	chrA04:17978808-17980298	Purple	Green	OK	6.94559	20.0948	1.53265	2.15632	0.0057	0.0316826	yes
BnaA04g24880D	chrA04:18100216-18104719	Purple	Green	OK	0.405288	1.85608	2.19523	2.28848	0.0089	0.0450125	yes
BnaA04g25170D	chrA04:18215801-18216258	Purple	Green	OK	32.7037	0	#NAME?	#NAME?	5e-05	0.000600056	yes
BnaA04g25180D	chrA04:18216611-18217106	Purple	Green	OK	6.37322	0	#NAME?	#NAME?	5e-05	0.000600056	yes
BnaA04g25190D	chrA04:18218614-18218958	Purple	Green	OK	50.6527	0	#NAME?	#NAME?	5e-05	0.000600056	yes
BnaA04g25260D	chrA04:18244795-18245422	Purple	Green	OK	16.5686	0	#NAME?	#NAME?	5e-05	0.000600056	yes
BnaA04g25360D	chrA04:18272170-18272926	Purple	Green	OK	0	2.69926	inf	#NAME?	0.0004	0.0036951	yes
BnaA04g25470D	chrA04:18305340-18307553	Purple	Green	OK	3.01972	60.4536	4.32334	4.92298	5e-05	0.000600056	yes
BnaA04g25480D	chrA04:18309437-18310736	Purple	Green	OK	0	2.13715	inf	#NAME?	5e-05	0.000600056	yes
BnaA04g25720D	chrA04:18391337-18394702	Purple	Green	OK	11.9556	0.555934	-4.42663	-4.5081	0.0005	0.00447196	yes
BnaA04g25800D	chrA04:18438467-18440376	Purple	Green	OK	3.55458	0	#NAME?	#NAME?	5e-05	0.000600056	yes
BnaA04g26120D	chrA04:18611313-18612236	Purple	Green	OK	2.97182	0	#NAME?	#NAME?	0.00055	0.00481964	yes
BnaA04g26280D	chrA04:18715026-18718686	Purple	Green	OK	1.92644	0	#NAME?	#NAME?	5e-05	0.000600056	yes
BnaA04g26420D	chrA04:18765953-18768004	Purple	Green	OK	0	20.0286	inf	#NAME?	5e-05	0.000600056	yes
BnaA04g26490D	chrA04:18783570-18784026	Purple	Green	OK	31.9722	0	#NAME?	#NAME?	5e-05	0.000600056	yes
BnaA04g26990D	chrA04:19060831-19061206	Purple	Green	OK	5.71846	0	#NAME?	#NAME?	5e-05	0.000600056	yes
BnaA04g27150D	chrA04:19129482-19129884	Purple	Green	OK	36.189	177.693	2.29576	4.38372	5e-05	0.000600056	yes
BnaA04g27820D	chrA04_random:364386-365551	Purple	Green	OK	0	1.72928	inf	#NAME?	0.0007	0.00589401	yes
BnaA04g27920D	chrA04_random:460995-461784	Purple	Green	OK	113.7	47.8716	-1.24799	-2.2843	0.0017	0.0121475	yes
BnaA04g28310D	chrA04_random:753861-755402	Purple	Green	OK	0	2.06282	inf	#NAME?	5e-05	0.000600056	yes
BnaA04g28570D	chrA04_random:870386-870845	Purple	Green	OK	0	2.83646	inf	#NAME?	5e-05	0.000600056	yes
BnaA04g28580D	chrA04_random:871597-872390	Purple	Green	OK	0	2.03992	inf	#NAME?	5e-05	0.000600056	yes
BnaA04g28960D	chrA04_random:1103061-1105394	Purple	Green	OK	10.0484	3.19002	-1.65533	-2.30207	0.0034	0.0210237	yes
BnaA04g29210D	chrA04_random:1268437-1268857	Purple	Green	OK	1025.82	2443.56	1.25221	2.30741	0.0016	0.0115957	yes
BnaA04g29570D	chrA04_random:1422938-1423887	Purple	Green	OK	22.7869	63.7689	1.48465	2.45526	0.001	0.00787399	yes
BnaA04g29680D	chrA04_random:1460004-1461740	Purple	Green	OK	1.96579	0	#NAME?	#NAME?	5e-05	0.000600056	yes
BnaA05g00140D	chrA05:80683-81403	Purple	Green	OK	0	3.60944	inf	#NAME?	5e-05	0.000600056	yes
BnaA05g00490D	chrA05:228839-229190	Purple	Green	OK	0	4.43907	inf	#NAME?	0.00065	0.00553406	yes
BnaA05g00500D	chrA05:230167-232352	Purple	Green	OK	0	2.52529	inf	#NAME?	5e-05	0.000600056	yes
BnaA05g01070D	chrA05:589106-590459	Purple	Green	OK	0	2.918	inf	#NAME?	5e-05	0.000600056	yes
BnaA05g01310D	chrA05:774101-776966	Purple	Green	OK	4.28797	0.395203	-3.43963	-3.34641	0.00325	0.0202919	yes
BnaA05g01580D	chrA05:922336-923925	Purple	Green	OK	3.94636	0	#NAME?	#NAME?	5e-05	0.000600056	yes
BnaA05g02390D	chrA05:1326627-1332006	Purple	Green	OK	2.19082	0	#NAME?	#NAME?	5e-05	0.000600056	yes
BnaA05g02550D	chrA05:1394295-1395048	Purple	Green	OK	0	5.91361	inf	#NAME?	5e-05	0.000600056	yes
BnaA05g02720D	chrA05:1458550-1460020	Purple	Green	OK	0	2.54708	inf	#NAME?	5e-05	0.000600056	yes
BnaA05g02980D	chrA05:1615442-1616864	Purple	Green	OK	3.37573	0	#NAME?	#NAME?	5e-05	0.000600056	yes
BnaA05g03020D	chrA05:1630519-1633286	Purple	Green	OK	0	2.80091	inf	#NAME?	5e-05	0.000600056	yes
BnaA05g03090D	chrA05:1678967-1680200	Purple	Green	OK	0	5.58032	inf	#NAME?	5e-05	0.000600056	yes
BnaA05g03120D	chrA05:1700929-1701737	Purple	Green	OK	0	2.25985	inf	#NAME?	0.0021	0.0143469	yes
BnaA05g03190D	chrA05:1724311-1726271	Purple	Green	OK	4.24578	0	#NAME?	#NAME?	5e-05	0.000600056	yes
BnaA05g03270D	chrA05:1832210-1832842	Purple	Green	OK	0	17.1089	inf	#NAME?	5e-05	0.000600056	yes
BnaA05g03540D	chrA05:1933502-1935605	Purple	Green	OK	3.65312	0	#NAME?	#NAME?	5e-05	0.000600056	yes
BnaA05g03570D	chrA05:1944548-1947335	Purple	Green	OK	4.01671	0.947268	-2.08417	-2.64937	0.0023	0.0154433	yes
BnaA05g03590D	chrA05:1952455-1953941	Purple	Green	OK	2.04108	0	#NAME?	#NAME?	5e-05	0.000600056	yes
BnaA05g03710D	chrA05:1995405-1997188	Purple	Green	OK	4.73361	0	#NAME?	#NAME?	5e-05	0.000600056	yes
BnaA05g03730D	chrA05:2002601-2004582	Purple	Green	OK	6.26603	0.435538	-3.84668	-3.77659	0.0011	0.00852321	yes
BnaA05g03740D	chrA05:2005960-2008663	Purple	Green	OK	25.0143	3.3683	-2.89266	-4.506	5e-05	0.000600056	yes
BnaA05g04220D	chrA05:2281301-2281675	Purple	Green	OK	0	54.7111	inf	#NAME?	5e-05	0.000600056	yes
BnaA05g04310D	chrA05:2307505-2309417	Purple	Green	OK	1.72139	5.35516	1.63736	2.15425	0.0078	0.0406221	yes
BnaA05g04400D	chrA05:2368520-2369946	Purple	Green	OK	0	12.7297	inf	#NAME?	5e-05	0.000600056	yes
BnaA05g04540D	chrA05:2429471-2429723	Purple	Green	OK	194.254	41.4229	-2.22945	-3.19205	0.0004	0.0036951	yes
BnaA05g04650D	chrA05:2471129-2472416	Purple	Green	OK	1.87708	13.8742	2.88585	3.62373	0.00025	0.0024567	yes
BnaA05g04770D	chrA05:2516232-2517386	Purple	Green	OK	40.7688	4.09767	-3.31459	-3.42782	0.0017	0.0121475	yes
BnaA05g04880D	chrA05:2571670-2575830	Purple	Green	OK	2.51949	0.623885	-2.01378	-2.44753	0.0036	0.0220225	yes
BnaA05g04990D	chrA05:2617739-2618965	Purple	Green	OK	9.91831	63.5486	2.67969	3.92409	0.00065	0.00553406	yes
BnaA05g05540D	chrA05:2901119-2902298	Purple	Green	OK	4.60236	19.5412	2.08607	2.90591	0.00085	0.00692421	yes
BnaA05g05600D	chrA05:2930439-2931744	Purple	Green	OK	0	5.99368	inf	#NAME?	5e-05	0.000600056	yes
BnaA05g05840D	chrA05:3055642-3058183	Purple	Green	OK	0.393756	10.7984	4.77737	4.29893	0.00495	0.0282838	yes
BnaA05g06620D	chrA05:3613844-3617415	Purple	Green	OK	0	8.33342	inf	#NAME?	5e-05	0.000600056	yes
BnaA05g06760D	chrA05:3661732-3663376	Purple	Green	OK	0	3.94171	inf	#NAME?	5e-05	0.000600056	yes
BnaA05g07020D	chrA05:3793163-3795817	Purple	Green	OK	2.5043	0	#NAME?	#NAME?	5e-05	0.000600056	yes
BnaA05g07100D	chrA05:3831871-3832471	Purple	Green	OK	5.94071	0	#NAME?	#NAME?	5e-05	0.000600056	yes
BnaA05g07460D	chrA05:4015970-4017646	Purple	Green	OK	6.68692	0.756703	-3.14354	-3.28844	0.002	0.0138257	yes
BnaA05g07550D	chrA05:4094560-4096290	Purple	Green	OK	0	2.24206	inf	#NAME?	5e-05	0.000600056	yes
BnaA05g07690D	chrA05:4184822-4186444	Purple	Green	OK	0	6.37734	inf	#NAME?	5e-05	0.000600056	yes
BnaA05g07800D	chrA05:4240656-4246594	Purple	Green	OK	3.04067	0	#NAME?	#NAME?	5e-05	0.000600056	yes
BnaA05g07820D	chrA05:4260375-4261839	Purple	Green	OK	4.59887	0	#NAME?	#NAME?	0.0001	0.0011169	yes
BnaA05g07860D	chrA05:4297802-4303161	Purple	Green	OK	5.8816	2.35028	-1.32338	-2.08488	0.0065	0.035273	yes
BnaA05g08110D	chrA05:4446990-4448544	Purple	Green	OK	21.4105	72.8358	1.76633	2.70065	0.0009	0.00726139	yes
BnaA05g08690D	chrA05:4815054-4815423	Purple	Green	OK	0	2.63139	inf	#NAME?	0.00525	0.0296335	yes
BnaA05g08710D	chrA05:4822476-4824337	Purple	Green	OK	0	7.55225	inf	#NAME?	5e-05	0.000600056	yes
BnaA05g08830D	chrA05:4870059-4877587	Purple	Green	OK	4.96032	2.0043	-1.30734	-2.23405	0.0026	0.0170575	yes
BnaA05g09410D	chrA05:5205391-5206192	Purple	Green	OK	1.63437	22.3914	3.77614	4.01381	0.00075	0.00624773	yes
BnaA05g09540D	chrA05:5263454-5266198	Purple	Green	OK	0.555936	2.39977	2.10991	2.08915	0.00975	0.0482011	yes
BnaA05g09700D	chrA05:5339198-5341143	Purple	Green	OK	0	1.81062	inf	#NAME?	5e-05	0.000600056	yes
BnaA05g09830D	chrA05:5422965-5423514	Purple	Green	OK	166.746	45.3603	-1.87815	-3.11659	5e-05	0.000600056	yes
BnaA05g10240D	chrA05:5586889-5588874	Purple	Green	OK	5.28669	0	#NAME?	#NAME?	5e-05	0.000600056	yes
BnaA05g10650D	chrA05:5809126-5812196	Purple	Green	OK	4.97859	0.469974	-3.40509	-3.30128	0.00325	0.0202919	yes
BnaA05g10710D	chrA05:5845965-5848146	Purple	Green	OK	11.1367	27.0945	1.28268	2.51609	0.0008	0.00659907	yes
BnaA05g10880D	chrA05:5973023-5975527	Purple	Green	OK	0.409253	4.77523	3.54451	2.98241	0.00955	0.0474025	yes
BnaA05g11170D	chrA05:6242296-6244803	Purple	Green	OK	7.29352	0.981467	-2.8936	-3.28512	0.0012	0.00912598	yes
BnaA05g11320D	chrA05:6341531-6342965	Purple	Green	OK	31.6796	15.0664	-1.07222	-2.04618	0.00315	0.019787	yes
BnaA05g12120D	chrA05:6956442-6958226	Purple	Green	OK	0	1.85818	inf	#NAME?	5e-05	0.000600056	yes
BnaA05g12250D	chrA05:7065792-7070118	Purple	Green	OK	0.849731	4.8359	2.5087	3.48207	0.0002	0.00205349	yes
BnaA05g12410D	chrA05:7202333-7204814	Purple	Green	OK	31.1873	64.8146	1.05536	2.06823	0.00385	0.0232326	yes
BnaA05g12690D	chrA05:7373217-7374313	Purple	Green	OK	0	6.48997	inf	#NAME?	5e-05	0.000600056	yes
BnaA05g12830D	chrA05:7490090-7491450	Purple	Green	OK	4.70952	0	#NAME?	#NAME?	5e-05	0.000600056	yes
BnaA05g12840D	chrA05:7506268-7508718	Purple	Green	OK	8.29908	1.47409	-2.49312	-3.14414	0.00065	0.00553406	yes
BnaA05g12980D	chrA05:7658287-7662788	Purple	Green	OK	17.9158	37.8376	1.07859	2.10116	0.0034	0.0210237	yes
BnaA05g13450D	chrA05:8196673-8198574	Purple	Green	OK	0.674862	9.74379	3.85182	3.66502	0.00275	0.0178263	yes
BnaA05g13480D	chrA05:8203395-8205282	Purple	Green	OK	0	3.66342	inf	#NAME?	5e-05	0.000600056	yes
BnaA05g13530D	chrA05:8225225-8228172	Purple	Green	OK	12.1765	0.963518	-3.65964	-4.80727	5e-05	0.000600056	yes
BnaA05g13640D	chrA05:8282361-8282844	Purple	Green	OK	0	134.32	inf	#NAME?	5e-05	0.000600056	yes
BnaA05g13750D	chrA05:8343018-8344560	Purple	Green	OK	1.04705	16.4475	3.97347	3.8956	0.00045	0.00408286	yes
BnaA05g13790D	chrA05:8365876-8367344	Purple	Green	OK	0	6.78641	inf	#NAME?	5e-05	0.000600056	yes
BnaA05g13900D	chrA05:8472911-8473478	Purple	Green	OK	0	6.57246	inf	#NAME?	5e-05	0.000600056	yes
BnaA05g14880D	chrA05:9338319-9342340	Purple	Green	OK	11.5159	1.44001	-2.99948	-4.44382	5e-05	0.000600056	yes
BnaA05g14890D	chrA05:9348470-9351086	Purple	Green	OK	2249.89	460.886	-2.28737	-1.45798	0.004	0.0239529	yes
BnaA05g15360D	chrA05:9815006-9817383	Purple	Green	OK	0	2.73124	inf	#NAME?	5e-05	0.000600056	yes
BnaA05g16480D	chrA05:11169958-11171666	Purple	Green	OK	16.437	113.932	2.79315	5.1641	5e-05	0.000600056	yes
BnaA05g16680D	chrA05:11341729-11342921	Purple	Green	OK	2.42837	0	#NAME?	#NAME?	0.0003	0.00287919	yes
BnaA05g16830D	chrA05:11532391-11534614	Purple	Green	OK	64.8161	25.9438	-1.32096	-2.47317	0.0009	0.00726139	yes
BnaA05g17350D	chrA05:12138914-12139322	Purple	Green	OK	14.1071	0	#NAME?	#NAME?	5e-05	0.000600056	yes
BnaA05g17440D	chrA05:12187574-12189536	Purple	Green	OK	6.31504	0	#NAME?	#NAME?	5e-05	0.000600056	yes
BnaA05g18550D	chrA05:13890518-13891300	Purple	Green	OK	3.81857	0	#NAME?	#NAME?	5e-05	0.000600056	yes
BnaA05g19350D	chrA05:14595149-14596931	Purple	Green	OK	4.18427	10.49	1.32596	2.01564	0.00905	0.0456631	yes
BnaA05g19970D	chrA05:15421424-15423337	Purple	Green	OK	0	2.52335	inf	#NAME?	5e-05	0.000600056	yes
BnaA05g20110D	chrA05:15568112-15570081	Purple	Green	OK	0	5.6958	inf	#NAME?	5e-05	0.000600056	yes
BnaA05g20700D	chrA05:16048440-16048937	Purple	Green	OK	7.77255	0	#NAME?	#NAME?	5e-05	0.000600056	yes
BnaA05g21400D	chrA05:16519948-16520927	Purple	Green	OK	12.3218	0	#NAME?	#NAME?	5e-05	0.000600056	yes
BnaA05g21980D	chrA05:16895498-16897254	Purple	Green	OK	6.77068	0	#NAME?	#NAME?	5e-05	0.000600056	yes
BnaA05g22060D	chrA05:16927007-16928786	Purple	Green	OK	6.62187	0	#NAME?	#NAME?	5e-05	0.000600056	yes
BnaA05g22070D	chrA05:16929159-16930356	Purple	Green	OK	28.1328	0	#NAME?	#NAME?	5e-05	0.000600056	yes
BnaA05g22120D	chrA05:16935865-16939060	Purple	Green	OK	3.21768	0.903684	-1.83213	-2.29716	0.00455	0.0264653	yes
BnaA05g22140D	chrA05:16940061-16946765	Purple	Green	OK	7.42101	3.70623	-1.00166	-1.86979	0.01025	0.0499185	yes
BnaA05g22420D	chrA05:17097963-17099804	Purple	Green	OK	35.7381	14.3064	-1.3208	-2.45522	0.00065	0.00553406	yes
BnaA05g23070D	chrA05:17492609-17497912	Purple	Green	OK	2.12973	0.425315	-2.32407	-2.67897	0.0022	0.014881	yes
BnaA05g23080D	chrA05:17504063-17507580	Purple	Green	OK	5.04481	1.71058	-1.56032	-2.17401	0.0052	0.0294654	yes
BnaA05g23410D	chrA05:17730292-17734074	Purple	Green	OK	0	6.75553	inf	#NAME?	5e-05	0.000600056	yes
BnaA05g23420D	chrA05:17736128-17736851	Purple	Green	OK	0	1.83514	inf	#NAME?	5e-05	0.000600056	yes
BnaA05g23430D	chrA05:17738639-17741819	Purple	Green	OK	0.821367	2.86008	1.79995	2.0876	0.0091	0.0458576	yes
BnaA05g23440D	chrA05:17743382-17747601	Purple	Green	OK	0.312127	1.87223	2.58455	2.54146	0.0056	0.0312514	yes
BnaA05g23450D	chrA05:17748772-17750008	Purple	Green	OK	2.28507	94.6932	5.37295	6.07265	0.0001	0.0011169	yes
BnaA05g23610D	chrA05:17813991-17817587	Purple	Green	OK	12.653	4.00405	-1.65995	-2.89003	0.0001	0.0011169	yes
BnaA05g23830D	chrA05:17969487-17971318	Purple	Green	OK	0	1.96317	inf	#NAME?	5e-05	0.000600056	yes
BnaA05g23950D	chrA05:18022456-18025179	Purple	Green	OK	4.28494	13.0517	1.60689	2.50417	0.0006	0.00517851	yes
BnaA05g24110D	chrA05:18146302-18148128	Purple	Green	OK	0	1.75597	inf	#NAME?	5e-05	0.000600056	yes
BnaA05g25240D	chrA05:18719355-18721118	Purple	Green	OK	263.139	120.602	-1.12558	-1.9549	0.0077	0.0402189	yes
BnaA05g25410D	chrA05:18804629-18807076	Purple	Green	OK	1.87282	0	#NAME?	#NAME?	5e-05	0.000600056	yes
BnaA05g26110D	chrA05:19199322-19200369	Purple	Green	OK	6.38756	0.849606	-2.9104	-2.39047	0.00765	0.040023	yes
BnaA05g26330D	chrA05:19315023-19315638	Purple	Green	OK	4.1457	0	#NAME?	#NAME?	5e-05	0.000600056	yes
BnaA05g26650D	chrA05:19449817-19450803	Purple	Green	OK	6.37642	0	#NAME?	#NAME?	5e-05	0.000600056	yes
BnaA05g26940D	chrA05:19555737-19559040	Purple	Green	OK	1.206	4.73742	1.97388	2.58776	0.00205	0.0140984	yes
BnaA05g27190D	chrA05:19643159-19644316	Purple	Green	OK	15.9499	43.685	1.45359	2.42683	0.0083	0.0426851	yes
BnaA05g28250D	chrA05:20118795-20119573	Purple	Green	OK	10.015	0	#NAME?	#NAME?	0.00155	0.0112947	yes
BnaA05g28710D	chrA05:20313705-20316803	Purple	Green	OK	7.63388	0	#NAME?	#NAME?	5e-05	0.000600056	yes
BnaA05g28810D	chrA05:20349089-20349960	Purple	Green	OK	492.499	214.074	-1.20201	-2.2017	0.00305	0.0193026	yes
BnaA05g29240D	chrA05:20498204-20503046	Purple	Green	OK	7.00091	0.654774	-3.41847	-3.94877	0.00025	0.0024567	yes
BnaA05g30230D	chrA05:20899936-20902895	Purple	Green	OK	0.937777	10.2412	3.449	3.41436	0.0027	0.0175555	yes
BnaA05g30340D	chrA05:21006136-21008675	Purple	Green	OK	12.9864	26.7182	1.04082	1.91493	0.00925	0.0462644	yes
BnaA05g30500D	chrA05:21072931-21075573	Purple	Green	OK	2.208	0	#NAME?	#NAME?	5e-05	0.000600056	yes
BnaA05g30680D	chrA05:21204797-21206050	Purple	Green	OK	8.26686	0	#NAME?	#NAME?	5e-05	0.000600056	yes
BnaA05g30690D	chrA05:21206454-21206725	Purple	Green	OK	462.425	1761.76	1.92972	5.31597	5e-05	0.000600056	yes
BnaA05g30700D	chrA05:21208051-21214162	Purple	Green	OK	3.35235	0.900983	-1.8956	-2.45172	0.00305	0.0193026	yes
BnaA05g30730D	chrA05:21225057-21228288	Purple	Green	OK	0	2.29716	inf	#NAME?	5e-05	0.000600056	yes
BnaA05g31130D	chrA05:21525856-21526372	Purple	Green	OK	0	2.63317	inf	#NAME?	0.00015	0.00159108	yes
BnaA05g31400D	chrA05:21636469-21637082	Purple	Green	OK	0	7.98618	inf	#NAME?	5e-05	0.000600056	yes
BnaA05g31410D	chrA05:21639257-21641520	Purple	Green	OK	0	3.5669	inf	#NAME?	5e-05	0.000600056	yes
BnaA05g31700D	chrA05:21868346-21870526	Purple	Green	OK	0	4.76907	inf	#NAME?	5e-05	0.000600056	yes
BnaA05g31790D	chrA05:21899058-21900489	Purple	Green	OK	0	9.80112	inf	#NAME?	5e-05	0.000600056	yes
BnaA05g31830D	chrA05:21915893-21919871	Purple	Green	OK	0	5.81371	inf	#NAME?	5e-05	0.000600056	yes
BnaA05g32090D	chrA05:22045981-22047104	Purple	Green	OK	8.44184	27.2389	1.69004	2.15481	0.0062	0.0339844	yes
BnaA05g32450D	chrA05:22176008-22177555	Purple	Green	OK	0	3.02719	inf	#NAME?	5e-05	0.000600056	yes
BnaA05g32850D	chrA05:22434941-22435898	Purple	Green	OK	2.52387	0	#NAME?	#NAME?	0.0031	0.019515	yes
BnaA05g32880D	chrA05:22446940-22449874	Purple	Green	OK	5.86022	0	#NAME?	#NAME?	5e-05	0.000600056	yes
BnaA05g33080D	chrA05:22528269-22534549	Purple	Green	OK	1.80629	7.55795	2.06497	3.55899	5e-05	0.000600056	yes
BnaA05g33110D	chrA05:22539611-22542895	Purple	Green	OK	3.10059	13.4088	2.11257	2.89803	0.00045	0.00408286	yes
BnaA05g33260D	chrA05:22593459-22595300	Purple	Green	OK	0	3.69413	inf	#NAME?	5e-05	0.000600056	yes
BnaA05g33270D	chrA05:22595805-22597669	Purple	Green	OK	0	1.80319	inf	#NAME?	5e-05	0.000600056	yes
BnaA05g33320D	chrA05:22608688-22610192	Purple	Green	OK	0	3.79016	inf	#NAME?	5e-05	0.000600056	yes
BnaA05g33360D	chrA05:22617999-22620001	Purple	Green	OK	17.6869	4.00983	-2.14107	-2.87762	0.0008	0.00659907	yes
BnaA05g33390D	chrA05:22627969-22632877	Purple	Green	OK	0	19.1578	inf	#NAME?	5e-05	0.000600056	yes
BnaA05g33450D	chrA05:22665046-22666029	Purple	Green	OK	0	5.51824	inf	#NAME?	5e-05	0.000600056	yes
BnaA05g33470D	chrA05:22668136-22670178	Purple	Green	OK	1.68806	5.49858	1.70369	2.09331	0.0057	0.0316826	yes
BnaA05g33540D	chrA05:22685873-22687543	Purple	Green	OK	2.62785	9.61382	1.87123	2.6699	0.0015	0.0110332	yes
BnaA05g33810D	chrA05:22817034-22820451	Purple	Green	OK	19.4136	469.658	4.59647	6.70465	5e-05	0.000600056	yes
BnaA05g33860D	chrA05:22847174-22848026	Purple	Green	OK	5.96393	23.3531	1.96928	2.74381	0.00105	0.00819322	yes
BnaA05g34030D	chrA05:22998190-23001322	Purple	Green	OK	0.884369	3.44536	1.96193	2.23753	0.00655	0.0355082	yes
BnaA05g34330D	chrA05_random:74107-76823	Purple	Green	OK	1.1366	7.88437	2.79426	2.78746	0.00835	0.0428804	yes
BnaA05g34690D	chrA05_random:280862-282987	Purple	Green	OK	0	1.83873	inf	#NAME?	5e-05	0.000600056	yes
BnaA05g34770D	chrA05_random:326731-328875	Purple	Green	OK	0	3.617	inf	#NAME?	5e-05	0.000600056	yes
BnaA05g35060D	chrA05_random:549588-553235	Purple	Green	OK	0.741696	4.50516	2.60268	2.6221	0.00405	0.0242071	yes
BnaA05g35560D	chrA05_random:986622-988134	Purple	Green	OK	0	11.2904	inf	#NAME?	5e-05	0.000600056	yes
BnaA05g36150D	chrA05_random:1716491-1717094	Purple	Green	OK	1.79366	0	#NAME?	#NAME?	0.0003	0.00287919	yes
BnaA05g36500D	chrA05_random:2450346-2450956	Purple	Green	OK	4.16553	0	#NAME?	#NAME?	0.00135	0.0100731	yes
BnaA05g36570D	chrA05_random:2509092-2510153	Purple	Green	OK	2.17221	29.9123	3.78351	5.16801	5e-05	0.000600056	yes
BnaA05g37000D	chrA05_random:2839098-2840312	Purple	Green	OK	0	3.54715	inf	#NAME?	5e-05	0.000600056	yes
BnaA05g37190D	chrA05_random:2914877-2915689	Purple	Green	OK	2.74753	0	#NAME?	#NAME?	5e-05	0.000600056	yes
BnaA06g00730D	chrA06:467883-469422	Purple	Green	OK	0	9.44555	inf	#NAME?	5e-05	0.000600056	yes
BnaA06g00990D	chrA06:659619-660978	Purple	Green	OK	3.57479	0.701475	-2.3494	-2.30132	0.0094	0.0468393	yes
BnaA06g01180D	chrA06:759633-760458	Purple	Green	OK	0	4.78146	inf	#NAME?	5e-05	0.000600056	yes
BnaA06g01690D	chrA06:1013513-1014476	Purple	Green	OK	45.8793	116.052	1.33886	2.42484	0.00125	0.00945687	yes
BnaA06g01890D	chrA06:1095210-1096423	Purple	Green	OK	0	18.3438	inf	#NAME?	5e-05	0.000600056	yes
BnaA06g01910D	chrA06:1105973-1106440	Purple	Green	OK	0	3.23227	inf	#NAME?	0.00025	0.0024567	yes
BnaA06g01990D	chrA06:1160715-1164261	Purple	Green	OK	150.917	32.5666	-2.21229	-3.0014	0.0003	0.00287919	yes
BnaA06g02520D	chrA06:1440456-1442527	Purple	Green	OK	0.712252	4.11086	2.52898	2.43518	0.00775	0.0404142	yes
BnaA06g03080D	chrA06:1858239-1861714	Purple	Green	OK	0.853443	3.30893	1.955	2.2083	0.0089	0.0450125	yes
BnaA06g03210D	chrA06:1966845-1967182	Purple	Green	OK	0	5.12118	inf	#NAME?	0.0088	0.0446406	yes
BnaA06g03560D	chrA06:2175029-2177009	Purple	Green	OK	0	1.95123	inf	#NAME?	0.0012	0.00912598	yes
BnaA06g04670D	chrA06:2736007-2738367	Purple	Green	OK	13.2039	3.06979	-2.10475	-2.80708	0.00065	0.00553406	yes
BnaA06g04820D	chrA06:2793605-2794216	Purple	Green	OK	40.9772	218.302	2.41343	4.40081	5e-05	0.000600056	yes
BnaA06g04950D	chrA06:2854170-2855756	Purple	Green	OK	8.66073	1.93724	-2.16048	-2.63257	0.00445	0.0259779	yes
BnaA06g05010D	chrA06:2882837-2884969	Purple	Green	OK	0	3.94404	inf	#NAME?	5e-05	0.000600056	yes
BnaA06g05360D	chrA06:3053859-3054414	Purple	Green	OK	10.5295	60.5748	2.52428	3.44543	0.0002	0.00205349	yes
BnaA06g05560D	chrA06:3129412-3131140	Purple	Green	OK	4.22032	0	#NAME?	#NAME?	5e-05	0.000600056	yes
BnaA06g05590D	chrA06:3138371-3139236	Purple	Green	OK	4.85982	71.8195	3.8854	4.9042	0.0001	0.0011169	yes
BnaA06g05650D	chrA06:3157897-3159559	Purple	Green	OK	0	9.35413	inf	#NAME?	5e-05	0.000600056	yes
BnaA06g07080D	chrA06:3771917-3776153	Purple	Green	OK	3.62961	0.494093	-2.87696	-3.18103	0.00105	0.00819322	yes
BnaA06g07130D	chrA06:3811171-3812057	Purple	Green	OK	18.4059	0	#NAME?	#NAME?	5e-05	0.000600056	yes
BnaA06g07140D	chrA06:3812500-3815929	Purple	Green	OK	1.99741	0	#NAME?	#NAME?	5e-05	0.000600056	yes
BnaA06g07540D	chrA06:4055115-4056003	Purple	Green	OK	1.89665	0	#NAME?	#NAME?	5e-05	0.000600056	yes
BnaA06g07550D	chrA06:4056068-4056851	Purple	Green	OK	0	1.73886	inf	#NAME?	0.00045	0.00408286	yes
BnaA06g07790D	chrA06:4161608-4163171	Purple	Green	OK	3.42287	38.6405	3.49684	5.18933	5e-05	0.000600056	yes
BnaA06g07940D	chrA06:4213948-4217118	Purple	Green	OK	4.46159	0	#NAME?	#NAME?	5e-05	0.000600056	yes
BnaA06g08160D	chrA06:4364501-4366739	Purple	Green	OK	4.32645	0	#NAME?	#NAME?	5e-05	0.000600056	yes
BnaA06g08170D	chrA06:4371468-4373009	Purple	Green	OK	10.6912	0	#NAME?	#NAME?	5e-05	0.000600056	yes
BnaA06g08530D	chrA06:4611361-4612961	Purple	Green	OK	0	1.76359	inf	#NAME?	5e-05	0.000600056	yes
BnaA06g08550D	chrA06:4615387-4618250	Purple	Green	OK	0.835352	15.5052	4.21422	4.2174	0.00085	0.00692421	yes
BnaA06g08720D	chrA06:4718005-4718802	Purple	Green	OK	0	3.40375	inf	#NAME?	5e-05	0.000600056	yes
BnaA06g08980D	chrA06:4875567-4876386	Purple	Green	OK	2.57509	18.0244	2.80726	2.99389	0.0023	0.0154433	yes
BnaA06g09100D	chrA06:4924305-4925765	Purple	Green	OK	1.8474	0	#NAME?	#NAME?	5e-05	0.000600056	yes
BnaA06g09250D	chrA06:4993178-4994418	Purple	Green	OK	2.13109	0	#NAME?	#NAME?	5e-05	0.000600056	yes
BnaA06g09270D	chrA06:4996968-4997904	Purple	Green	OK	9.02532	0	#NAME?	#NAME?	5e-05	0.000600056	yes
BnaA06g10520D	chrA06:5581083-5581969	Purple	Green	OK	1.77535	74.4274	5.38966	6.29496	0.00055	0.00481964	yes
BnaA06g10670D	chrA06:5627821-5629684	Purple	Green	OK	0.848367	21.6682	4.67475	4.98297	0.0005	0.00447196	yes
BnaA06g11040D	chrA06:5760151-5762690	Purple	Green	OK	4.39961	16.3806	1.89654	2.88632	0.00045	0.00408286	yes
BnaA06g11180D	chrA06:5863486-5863729	Purple	Green	OK	6.25867	0	#NAME?	#NAME?	0.00675	0.0362796	yes
BnaA06g11350D	chrA06:5916331-5918109	Purple	Green	OK	2.45779	17.3251	2.81743	3.52118	0.0001	0.0011169	yes
BnaA06g12100D	chrA06:6263139-6263988	Purple	Green	OK	57.6211	0	#NAME?	#NAME?	5e-05	0.000600056	yes
BnaA06g12870D	chrA06:6732391-6735080	Purple	Green	OK	21.1762	1.07521	-4.29976	-4.25333	0.00155	0.0112947	yes
BnaA06g13460D	chrA06:7067609-7068707	Purple	Green	OK	65.2812	34.1028	-0.936776	-1.86114	0.0096	0.0475991	yes
BnaA06g13580D	chrA06:7123738-7128032	Purple	Green	OK	11.49	22.152	0.947064	1.84985	0.0091	0.0458576	yes
BnaA06g13750D	chrA06:7327624-7329251	Purple	Green	OK	29.6729	12.9588	-1.19521	-2.11112	0.0041	0.024424	yes
BnaA06g14490D	chrA06:7832675-7833861	Purple	Green	OK	3.53389	0	#NAME?	#NAME?	0.00065	0.00553406	yes
BnaA06g15140D	chrA06:8296123-8298802	Purple	Green	OK	0	17.7212	inf	#NAME?	5e-05	0.000600056	yes
BnaA06g15340D	chrA06:8407397-8413351	Purple	Green	OK	2.17025	0.196551	-3.46488	-3.34802	0.0028	0.0180555	yes
BnaA06g15440D	chrA06:8453500-8454800	Purple	Green	OK	1.85647	0	#NAME?	#NAME?	5e-05	0.000600056	yes
BnaA06g15650D	chrA06:8601817-8604397	Purple	Green	OK	0	2.97135	inf	#NAME?	5e-05	0.000600056	yes
BnaA06g15800D	chrA06:8679908-8680202	Purple	Green	OK	7.75336	0	#NAME?	#NAME?	0.0007	0.00589401	yes
BnaA06g15810D	chrA06:8681210-8682736	Purple	Green	OK	0	5.96953	inf	#NAME?	5e-05	0.000600056	yes
BnaA06g16050D	chrA06:8857868-8859349	Purple	Green	OK	0	2.06882	inf	#NAME?	5e-05	0.000600056	yes
BnaA06g16140D	chrA06:8956963-8959906	Purple	Green	OK	2.05131	8.66074	2.07795	3.04001	0.0005	0.00447196	yes
BnaA06g16330D	chrA06:9160490-9162522	Purple	Green	OK	1.0934	11.0371	3.33547	3.14564	0.0024	0.0160042	yes
BnaA06g16440D	chrA06:9243564-9244593	Purple	Green	OK	6.351	0	#NAME?	#NAME?	5e-05	0.000600056	yes
BnaA06g16510D	chrA06:9302287-9302795	Purple	Green	OK	13.963	0	#NAME?	#NAME?	5e-05	0.000600056	yes
BnaA06g16600D	chrA06:9358110-9360080	Purple	Green	OK	6.52446	0	#NAME?	#NAME?	5e-05	0.000600056	yes
BnaA06g16610D	chrA06:9363170-9364877	Purple	Green	OK	1.85405	0	#NAME?	#NAME?	0.0001	0.0011169	yes
BnaA06g16930D	chrA06:9549697-9550147	Purple	Green	OK	1.71058	0	#NAME?	#NAME?	0.00475	0.0273163	yes
BnaA06g16950D	chrA06:9556061-9558854	Purple	Green	OK	3.19417	0	#NAME?	#NAME?	5e-05	0.000600056	yes
BnaA06g17140D	chrA06:9699052-9700950	Purple	Green	OK	2.91752	11.642	1.99652	2.73083	0.00085	0.00692421	yes
BnaA06g17240D	chrA06:9792828-9794873	Purple	Green	OK	4.99654	14.4799	1.53505	2.28036	0.0031	0.019515	yes
BnaA06g17350D	chrA06:9888639-9889880	Purple	Green	OK	110.274	1311.99	3.57259	4.50307	5e-05	0.000600056	yes
BnaA06g17380D	chrA06:9901356-9904285	Purple	Green	OK	1.26375	6.0145	2.25073	2.76444	0.00175	0.0124272	yes
BnaA06g17680D	chrA06:10086808-10089233	Purple	Green	OK	2.43234	0	#NAME?	#NAME?	5e-05	0.000600056	yes
BnaA06g17710D	chrA06:10104751-10109083	Purple	Green	OK	3.31712	39.7661	3.58354	6.24663	5e-05	0.000600056	yes
BnaA06g17760D	chrA06:10119835-10120336	Purple	Green	OK	0	12.8014	inf	#NAME?	5e-05	0.000600056	yes
BnaA06g18120D	chrA06:10352727-10354217	Purple	Green	OK	9.2219	2.34006	-1.97851	-2.19544	0.00935	0.0466772	yes
BnaA06g18130D	chrA06:10354552-10356265	Purple	Green	OK	3.39433	0	#NAME?	#NAME?	5e-05	0.000600056	yes
BnaA06g18240D	chrA06:10473648-10474570	Purple	Green	OK	3.0873	0	#NAME?	#NAME?	0.0001	0.0011169	yes
BnaA06g19260D	chrA06:11644102-11644866	Purple	Green	OK	0	29.3591	inf	#NAME?	5e-05	0.000600056	yes
BnaA06g19490D	chrA06:11921101-11922459	Purple	Green	OK	33.4337	137.165	2.03653	3.88446	5e-05	0.000600056	yes
BnaA06g19860D	chrA06:12482533-12491076	Purple	Green	OK	0.98357	4.36994	2.15151	2.97942	0.0004	0.0036951	yes
BnaA06g20770D	chrA06:14313697-14314359	Purple	Green	OK	354.422	166.234	-1.09225	-2.09338	0.00365	0.0222859	yes
BnaA06g22490D	chrA06:15713427-15714269	Purple	Green	OK	0	20.6043	inf	#NAME?	5e-05	0.000600056	yes
BnaA06g22590D	chrA06:15794882-15796852	Purple	Green	OK	0.491384	8.57891	4.12587	3.64168	0.0055	0.0308006	yes
BnaA06g22600D	chrA06:15798868-15802986	Purple	Green	OK	0	1.68235	inf	#NAME?	5e-05	0.000600056	yes
BnaA06g22660D	chrA06:15820276-15821809	Purple	Green	OK	10.319	37.4347	1.85907	2.94419	0.00015	0.00159108	yes
BnaA06g22690D	chrA06:15848358-15855081	Purple	Green	OK	0.583255	2.08809	1.83999	2.28182	0.00415	0.0246714	yes
BnaA06g22720D	chrA06:15936672-15938491	Purple	Green	OK	10.5668	44.9797	2.08974	3.95209	5e-05	0.000600056	yes
BnaA06g22930D	chrA06:16041762-16045522	Purple	Green	OK	33.7222	0.754236	-5.48254	-7.05715	5e-05	0.000600056	yes
BnaA06g22960D	chrA06:16048105-16051140	Purple	Green	OK	6.03947	0.253784	-4.57275	-4.04034	0.0101	0.0493756	yes
BnaA06g23020D	chrA06:16075018-16076368	Purple	Green	OK	3.14303	0	#NAME?	#NAME?	5e-05	0.000600056	yes
BnaA06g23190D	chrA06:16154412-16155112	Purple	Green	OK	0	77.8832	inf	#NAME?	5e-05	0.000600056	yes
BnaA06g23230D	chrA06:16171907-16172995	Purple	Green	OK	14.2561	0	#NAME?	#NAME?	5e-05	0.000600056	yes
BnaA06g24150D	chrA06:16729024-16729769	Purple	Green	OK	38.3896	135.4	1.81844	2.8527	0.00015	0.00159108	yes
BnaA06g24210D	chrA06:16749412-16751360	Purple	Green	OK	7.61897	0.801678	-3.2485	-3.23376	0.00145	0.0107096	yes
BnaA06g24270D	chrA06:16829183-16832131	Purple	Green	OK	5.924	1.19186	-2.31335	-2.79276	0.0017	0.0121475	yes
BnaA06g24340D	chrA06:16905721-16908447	Purple	Green	OK	5.7214	0	#NAME?	#NAME?	5e-05	0.000600056	yes
BnaA06g24650D	chrA06:17138307-17141392	Purple	Green	OK	2.13068	0.489021	-2.12335	-2.36358	0.00605	0.0332646	yes
BnaA06g24820D	chrA06:17244500-17244861	Purple	Green	OK	43.3723	0	#NAME?	#NAME?	5e-05	0.000600056	yes
BnaA06g25430D	chrA06:17585421-17586271	Purple	Green	OK	0	2.63755	inf	#NAME?	5e-05	0.000600056	yes
BnaA06g25440D	chrA06:17587291-17589399	Purple	Green	OK	0	2.65631	inf	#NAME?	5e-05	0.000600056	yes
BnaA06g25900D	chrA06:17920741-17921863	Purple	Green	OK	0	3.26069	inf	#NAME?	5e-05	0.000600056	yes
BnaA06g26380D	chrA06:18152687-18153996	Purple	Green	OK	33.6812	0	#NAME?	#NAME?	5e-05	0.000600056	yes
BnaA06g26460D	chrA06:18192044-18196029	Purple	Green	OK	3.33196	0	#NAME?	#NAME?	5e-05	0.000600056	yes
BnaA06g27160D	chrA06:18648628-18650851	Purple	Green	OK	0	4.99412	inf	#NAME?	5e-05	0.000600056	yes
BnaA06g27270D	chrA06:18724389-18725545	Purple	Green	OK	0	2.02407	inf	#NAME?	5e-05	0.000600056	yes
BnaA06g27920D	chrA06:19204180-19205426	Purple	Green	OK	0	2.22721	inf	#NAME?	5e-05	0.000600056	yes
BnaA06g28120D	chrA06:19310284-19312260	Purple	Green	OK	13.3312	1.61333	-3.0467	-3.25282	0.0014	0.0103858	yes
BnaA06g28520D	chrA06:19605571-19606802	Purple	Green	OK	0	2.30876	inf	#NAME?	5e-05	0.000600056	yes
BnaA06g28960D	chrA06:19809450-19811663	Purple	Green	OK	7.68241	0	#NAME?	#NAME?	5e-05	0.000600056	yes
BnaA06g29010D	chrA06:19823482-19835047	Purple	Green	OK	2.98887	1.16978	-1.35335	-2.14101	0.00445	0.0259779	yes
BnaA06g29060D	chrA06:19852084-19852997	Purple	Green	OK	104.524	441.767	2.07944	4.0855	5e-05	0.000600056	yes
BnaA06g29490D	chrA06:20089329-20091000	Purple	Green	OK	9.52898	0	#NAME?	#NAME?	5e-05	0.000600056	yes
BnaA06g29710D	chrA06:20236877-20238008	Purple	Green	OK	1.20153	8.05865	2.74567	2.85853	0.00355	0.021804	yes
BnaA06g29730D	chrA06:20242767-20250878	Purple	Green	OK	10.1737	5.34416	-0.928811	-1.81874	0.00985	0.0485682	yes
BnaA06g29760D	chrA06:20257218-20258422	Purple	Green	OK	1.75311	0	#NAME?	#NAME?	0.0001	0.0011169	yes
BnaA06g29790D	chrA06:20269272-20272902	Purple	Green	OK	1.14368	9.54474	3.06102	4.02039	5e-05	0.000600056	yes
BnaA06g30060D	chrA06:20388518-20389382	Purple	Green	OK	2.34594	0	#NAME?	#NAME?	5e-05	0.000600056	yes
BnaA06g30080D	chrA06:20394433-20396201	Purple	Green	OK	3.85492	0	#NAME?	#NAME?	5e-05	0.000600056	yes
BnaA06g30540D	chrA06:20599965-20602291	Purple	Green	OK	19.9568	0	#NAME?	#NAME?	5e-05	0.000600056	yes
BnaA06g30620D	chrA06:20631558-20632679	Purple	Green	OK	3.21277	0	#NAME?	#NAME?	5e-05	0.000600056	yes
BnaA06g30640D	chrA06:20670659-20672605	Purple	Green	OK	3.20367	0	#NAME?	#NAME?	5e-05	0.000600056	yes
BnaA06g30890D	chrA06:20850138-20854578	Purple	Green	OK	0.202963	29.5854	7.18753	6.75639	0.0026	0.0170575	yes
BnaA06g31250D	chrA06:21037917-21044102	Purple	Green	OK	0	1.72027	inf	#NAME?	5e-05	0.000600056	yes
BnaA06g31360D	chrA06:21099088-21104770	Purple	Green	OK	2.56567	7.36117	1.5206	2.46067	0.0013	0.00977745	yes
BnaA06g31910D	chrA06:21354357-21355254	Purple	Green	OK	2.11119	0	#NAME?	#NAME?	5e-05	0.000600056	yes
BnaA06g32330D	chrA06:21588008-21588655	Purple	Green	OK	3.52646	0	#NAME?	#NAME?	5e-05	0.000600056	yes
BnaA06g32430D	chrA06:21623764-21625710	Purple	Green	OK	3.91204	0	#NAME?	#NAME?	5e-05	0.000600056	yes
BnaA06g32830D	chrA06:21768255-21772205	Purple	Green	OK	1.98694	0.541426	-1.87571	-2.26982	0.00355	0.021804	yes
BnaA06g33030D	chrA06:21882345-21883950	Purple	Green	OK	4.38153	0	#NAME?	#NAME?	5e-05	0.000600056	yes
BnaA06g33270D	chrA06:22014225-22015179	Purple	Green	OK	0	1.80224	inf	#NAME?	5e-05	0.000600056	yes
BnaA06g33590D	chrA06:22301027-22304806	Purple	Green	OK	9.05638	17.8787	0.981235	1.96233	0.0078	0.0406221	yes
BnaA06g33720D	chrA06:22368023-22369483	Purple	Green	OK	0	13.3014	inf	#NAME?	5e-05	0.000600056	yes
BnaA06g33830D	chrA06:22422030-22424311	Purple	Green	OK	1.47927	10.0381	2.76253	3.07312	0.00195	0.013518	yes
BnaA06g34160D	chrA06:22605321-22607278	Purple	Green	OK	0	13.8404	inf	#NAME?	5e-05	0.000600056	yes
BnaA06g34490D	chrA06:22781818-22783709	Purple	Green	OK	0	2.43232	inf	#NAME?	5e-05	0.000600056	yes
BnaA06g35440D	chrA06:23295477-23296450	Purple	Green	OK	0	4.26927	inf	#NAME?	0.0005	0.00447196	yes
BnaA06g35530D	chrA06:23329878-23331124	Purple	Green	OK	2.0182	10.7215	2.40936	2.63273	0.0039	0.0234725	yes
BnaA06g35920D	chrA06:23583382-23585518	Purple	Green	OK	5.67838	20.193	1.83031	3.47383	5e-05	0.000600056	yes
BnaA06g36070D	chrA06:23658638-23662239	Purple	Green	OK	21.1961	10.4041	-1.02665	-2.05121	0.00475	0.0273163	yes
BnaA06g36080D	chrA06:23662988-23665413	Purple	Green	OK	5.69448	1.82969	-1.63796	-2.03814	0.0088	0.0446406	yes
BnaA06g36180D	chrA06:23739775-23742422	Purple	Green	OK	5.05574	18.4184	1.86515	2.89968	0.00025	0.0024567	yes
BnaA06g36540D	chrA06:23915565-23919914	Purple	Green	OK	2.73018	0.428369	-2.67207	-3.03541	0.00195	0.013518	yes
BnaA06g37070D	chrA06:24180465-24182084	Purple	Green	OK	1.03719	11.2173	3.43497	3.58217	0.0007	0.00589401	yes
BnaA06g37230D	chrA06:24314147-24316076	Purple	Green	OK	22.653	78.1481	1.78651	3.49088	5e-05	0.000600056	yes
BnaA06g37500D	chrA06_random:26709-30589	Purple	Green	OK	9.20007	1.41881	-2.69696	-3.45775	5e-05	0.000600056	yes
BnaA06g38050D	chrA06_random:295984-297013	Purple	Green	OK	15.0497	5.40316	-1.47786	-2.18375	0.0042	0.0248948	yes
BnaA06g38140D	chrA06_random:355031-359190	Purple	Green	OK	0	1.83974	inf	#NAME?	5e-05	0.000600056	yes
BnaA06g38230D	chrA06_random:443199-444660	Purple	Green	OK	26.9912	4.63538	-2.54173	-2.95735	0.0033	0.0205242	yes
BnaA06g39290D	chrA06_random:1474316-1475301	Purple	Green	OK	108.124	3.44607	-4.97159	-6.04694	5e-05	0.000600056	yes
BnaA06g39330D	chrA06_random:1494413-1495745	Purple	Green	OK	0	3.13307	inf	#NAME?	5e-05	0.000600056	yes
BnaA06g39370D	chrA06_random:1523946-1525157	Purple	Green	OK	19.9064	70.0794	1.81576	3.45362	5e-05	0.000600056	yes
BnaA06g39400D	chrA06_random:1549603-1551195	Purple	Green	OK	2.047	0	#NAME?	#NAME?	5e-05	0.000600056	yes
BnaA06g39560D	chrA06_random:1619119-1620439	Purple	Green	OK	9.00447	26.0444	1.53226	2.79223	0.0004	0.0036951	yes
BnaA06g40300D	chrA06_random:1977812-1978907	Purple	Green	OK	4.46741	12.0927	1.43662	2.15414	0.00525	0.0296335	yes
BnaA06g40600D	chrA06_random:2100512-2102045	Purple	Green	OK	20.333	0	#NAME?	#NAME?	5e-05	0.000600056	yes
BnaA06g40620D	chrA06_random:2107264-2108540	Purple	Green	OK	3.53015	0	#NAME?	#NAME?	5e-05	0.000600056	yes
BnaA07g00090D	chrA07:59909-61433	Purple	Green	OK	0	15.7784	inf	#NAME?	5e-05	0.000600056	yes
BnaA07g00210D	chrA07:210026-212472	Purple	Green	OK	0	21.7414	inf	#NAME?	5e-05	0.000600056	yes
BnaA07g00240D	chrA07:236666-239157	Purple	Green	OK	0	9.83265	inf	#NAME?	5e-05	0.000600056	yes
BnaA07g00290D	chrA07:259390-263949	Purple	Green	OK	0	17.8577	inf	#NAME?	5e-05	0.000600056	yes
BnaA07g00360D	chrA07:289901-291366	Purple	Green	OK	0	2.47685	inf	#NAME?	5e-05	0.000600056	yes
BnaA07g00410D	chrA07:314741-317130	Purple	Green	OK	0	2.16893	inf	#NAME?	5e-05	0.000600056	yes
BnaA07g00630D	chrA07:452627-454826	Purple	Green	OK	0	4.72216	inf	#NAME?	5e-05	0.000600056	yes
BnaA07g00650D	chrA07:483126-487472	Purple	Green	OK	0.463063	3.10264	2.74422	3.27841	0.001	0.00787399	yes
BnaA07g00670D	chrA07:498184-500806	Purple	Green	OK	0	3.74589	inf	#NAME?	5e-05	0.000600056	yes
BnaA07g00700D	chrA07:519606-523946	Purple	Green	OK	0	3.45218	inf	#NAME?	5e-05	0.000600056	yes
BnaA07g00910D	chrA07:636070-637702	Purple	Green	OK	0.870041	3.41829	1.97412	2.26135	0.0094	0.0468393	yes
BnaA07g01890D	chrA07:1588948-1589455	Purple	Green	OK	22.3824	57.8973	1.37113	2.28097	0.00185	0.0130048	yes
BnaA07g02630D	chrA07:2307438-2311677	Purple	Green	OK	14.2452	0	#NAME?	#NAME?	5e-05	0.000600056	yes
BnaA07g05040D	chrA07:5464244-5466041	Purple	Green	OK	11.108	4.79393	-1.21231	-2.03351	0.00675	0.0362796	yes
BnaA07g05110D	chrA07:5501642-5505701	Purple	Green	OK	49.9956	15.6452	-1.67608	-3.28589	5e-05	0.000600056	yes
BnaA07g05550D	chrA07:5845553-5848119	Purple	Green	OK	5.25408	0	#NAME?	#NAME?	5e-05	0.000600056	yes
BnaA07g05560D	chrA07:5863793-5865715	Purple	Green	OK	1.91789	0	#NAME?	#NAME?	5e-05	0.000600056	yes
BnaA07g06890D	chrA07:7145068-7145287	Purple	Green	OK	8.08702	0	#NAME?	#NAME?	0.0092	0.0461007	yes
BnaA07g07240D	chrA07:7531595-7532840	Purple	Green	OK	3.18993	0	#NAME?	#NAME?	5e-05	0.000600056	yes
BnaA07g07550D	chrA07:7841338-7848168	Purple	Green	OK	0	2.22726	inf	#NAME?	5e-05	0.000600056	yes
BnaA07g07560D	chrA07:7848571-7849375	Purple	Green	OK	35.6447	194.799	2.45022	4.34505	5e-05	0.000600056	yes
BnaA07g07590D	chrA07:7856002-7859065	Purple	Green	OK	0	3.79899	inf	#NAME?	5e-05	0.000600056	yes
BnaA07g07710D	chrA07:7932676-7937793	Purple	Green	OK	2.19156	13.3896	2.61108	4.29544	5e-05	0.000600056	yes
BnaA07g07790D	chrA07:8068822-8070542	Purple	Green	OK	2.69071	12.1076	2.16986	2.8905	0.00065	0.00553406	yes
BnaA07g08210D	chrA07:8348781-8351227	Purple	Green	OK	11.1175	36.2274	1.70424	2.77721	0.00035	0.00329203	yes
BnaA07g08410D	chrA07:8539845-8540507	Purple	Green	OK	0	7.7431	inf	#NAME?	5e-05	0.000600056	yes
BnaA07g08420D	chrA07:8540777-8541837	Purple	Green	OK	10.579	30.5553	1.53022	2.27199	0.00375	0.0227491	yes
BnaA07g08470D	chrA07:8573186-8577756	Purple	Green	OK	4.83446	12.3903	1.35778	2.47802	0.00115	0.00882952	yes
BnaA07g08730D	chrA07:8751472-8758505	Purple	Green	OK	2.0476	0	#NAME?	#NAME?	5e-05	0.000600056	yes
BnaA07g08810D	chrA07:8891693-8892890	Purple	Green	OK	2.03233	0	#NAME?	#NAME?	5e-05	0.000600056	yes
BnaA07g08920D	chrA07:8927254-8927912	Purple	Green	OK	66.2473	14.324	-2.20943	-2.94466	0.00085	0.00692421	yes
BnaA07g09050D	chrA07:8984769-8988069	Purple	Green	OK	45.978	8.06872	-2.51053	-4.57671	5e-05	0.000600056	yes
BnaA07g09060D	chrA07:8991207-8992356	Purple	Green	OK	0	1.90749	inf	#NAME?	5e-05	0.000600056	yes
BnaA07g09270D	chrA07:9111792-9113474	Purple	Green	OK	8.17853	46.559	2.50915	3.97952	5e-05	0.000600056	yes
BnaA07g10330D	chrA07:9804565-9805845	Purple	Green	OK	2.2299	0	#NAME?	#NAME?	5e-05	0.000600056	yes
BnaA07g11150D	chrA07:10476550-10483288	Purple	Green	OK	3.19526	0.547871	-2.54402	-3.2195	0.00045	0.00408286	yes
BnaA07g12120D	chrA07:11123893-11132441	Purple	Green	OK	3.8504	1.52552	-1.3357	-2.15758	0.0045	0.0262268	yes
BnaA07g12310D	chrA07:11224336-11225639	Purple	Green	OK	5.99132	0	#NAME?	#NAME?	5e-05	0.000600056	yes
BnaA07g12480D	chrA07:11306887-11308289	Purple	Green	OK	24.981	137.951	2.46525	4.51857	5e-05	0.000600056	yes
BnaA07g12790D	chrA07:11439415-11440142	Purple	Green	OK	13.46	0	#NAME?	#NAME?	5e-05	0.000600056	yes
BnaA07g13070D	chrA07:11701281-11703027	Purple	Green	OK	0	2.77536	inf	#NAME?	0.0012	0.00912598	yes
BnaA07g13280D	chrA07:11792774-11793724	Purple	Green	OK	0	2.0071	inf	#NAME?	5e-05	0.000600056	yes
BnaA07g13330D	chrA07:11845480-11847592	Purple	Green	OK	10.169	50.6662	2.31685	4.184	5e-05	0.000600056	yes
BnaA07g13670D	chrA07:12037436-12038198	Purple	Green	OK	0	1.90549	inf	#NAME?	5e-05	0.000600056	yes
BnaA07g13840D	chrA07:12244051-12245192	Purple	Green	OK	1.82641	0	#NAME?	#NAME?	0.001	0.00787399	yes
BnaA07g14380D	chrA07:12730489-12731518	Purple	Green	OK	0	4.13953	inf	#NAME?	5e-05	0.000600056	yes
BnaA07g14420D	chrA07:12744763-12745568	Purple	Green	OK	23.0658	2102.35	6.5101	7.89308	5e-05	0.000600056	yes
BnaA07g14470D	chrA07:12764179-12765836	Purple	Green	OK	0	45.7508	inf	#NAME?	5e-05	0.000600056	yes
BnaA07g14490D	chrA07:12777197-12779409	Purple	Green	OK	0	2.64941	inf	#NAME?	5e-05	0.000600056	yes
BnaA07g14520D	chrA07:12818113-12820501	Purple	Green	OK	0	1.88746	inf	#NAME?	5e-05	0.000600056	yes
BnaA07g15230D	chrA07:13236918-13237537	Purple	Green	OK	0	2.60699	inf	#NAME?	5e-05	0.000600056	yes
BnaA07g15350D	chrA07:13281942-13282838	Purple	Green	OK	2.14817	0	#NAME?	#NAME?	5e-05	0.000600056	yes
BnaA07g15470D	chrA07:13398175-13402328	Purple	Green	OK	0.317738	2.05917	2.69616	2.63128	0.001	0.00787399	yes
BnaA07g15900D	chrA07:13618483-13619930	Purple	Green	OK	5.03749	24.7539	2.29688	3.3788	0.0007	0.00589401	yes
BnaA07g15980D	chrA07:13646496-13649245	Purple	Green	OK	0	3.29984	inf	#NAME?	5e-05	0.000600056	yes
BnaA07g16060D	chrA07:13697452-13700182	Purple	Green	OK	4.23519	0.744452	-2.50818	-2.59285	0.0046	0.0266738	yes
BnaA07g16150D	chrA07:13764533-13764979	Purple	Green	OK	195.821	0	#NAME?	#NAME?	5e-05	0.000600056	yes
BnaA07g16300D	chrA07:13833083-13834689	Purple	Green	OK	0	3.9618	inf	#NAME?	5e-05	0.000600056	yes
BnaA07g16380D	chrA07:13885587-13887792	Purple	Green	OK	0	1.86559	inf	#NAME?	5e-05	0.000600056	yes
BnaA07g16440D	chrA07:13909186-13911954	Purple	Green	OK	15.6817	5.61192	-1.48252	-2.20249	0.00185	0.0130048	yes
BnaA07g16510D	chrA07:13969453-13971592	Purple	Green	OK	5.13881	0	#NAME?	#NAME?	5e-05	0.000600056	yes
BnaA07g17040D	chrA07:14348504-14350760	Purple	Green	OK	16.0528	63.288	1.97911	3.83504	5e-05	0.000600056	yes
BnaA07g17130D	chrA07:14395332-14397256	Purple	Green	OK	85.0256	34.75	-1.29088	-2.34096	0.0011	0.00852321	yes
BnaA07g17200D	chrA07:14427283-14428927	Purple	Green	OK	5.70876	12.2235	1.09841	1.84764	0.0102	0.0497203	yes
BnaA07g17370D	chrA07:14537904-14538264	Purple	Green	OK	0	9.4259	inf	#NAME?	0.00525	0.0296335	yes
BnaA07g18770D	chrA07:15221584-15223450	Purple	Green	OK	13.9336	0	#NAME?	#NAME?	5e-05	0.000600056	yes
BnaA07g19010D	chrA07:15375638-15377521	Purple	Green	OK	6.90712	1.57082	-2.13657	-2.47701	0.00485	0.0277867	yes
BnaA07g19720D	chrA07:15678961-15681022	Purple	Green	OK	0.663531	4.97347	2.90602	2.78241	0.0076	0.0398069	yes
BnaA07g19730D	chrA07:15681710-15684992	Purple	Green	OK	1.77026	14.4943	3.03345	4.52164	5e-05	0.000600056	yes
BnaA07g19930D	chrA07:15801131-15803121	Purple	Green	OK	4.74083	0	#NAME?	#NAME?	5e-05	0.000600056	yes
BnaA07g20370D	chrA07:15985329-15987356	Purple	Green	OK	0.769615	3.97514	2.3688	2.2099	0.00995	0.0489483	yes
BnaA07g20530D	chrA07:16067061-16068018	Purple	Green	OK	10.6303	2.21663	-2.26174	-2.98833	0.00115	0.00882952	yes
BnaA07g20860D	chrA07:16259578-16260386	Purple	Green	OK	12.2927	0	#NAME?	#NAME?	5e-05	0.000600056	yes
BnaA07g20940D	chrA07:16306899-16308329	Purple	Green	OK	19.7789	5.13134	-1.94655	-2.88005	0.0003	0.00287919	yes
BnaA07g21800D	chrA07:16830451-16834890	Purple	Green	OK	2.16958	6.46115	1.57437	2.29204	0.003	0.0190614	yes
BnaA07g21850D	chrA07:16856595-16864463	Purple	Green	OK	10.0695	28.4684	1.49937	3.00222	5e-05	0.000600056	yes
BnaA07g21990D	chrA07:16908402-16911399	Purple	Green	OK	13.2476	5.29289	-1.3236	-2.15752	0.0041	0.024424	yes
BnaA07g22530D	chrA07:17159475-17160873	Purple	Green	OK	5.0775	0	#NAME?	#NAME?	5e-05	0.000600056	yes
BnaA07g23350D	chrA07:17564031-17566202	Purple	Green	OK	2.72764	0	#NAME?	#NAME?	5e-05	0.000600056	yes
BnaA07g23360D	chrA07:17600321-17600624	Purple	Green	OK	6.59499	0	#NAME?	#NAME?	0.00025	0.0024567	yes
BnaA07g24500D	chrA07:18343069-18343885	Purple	Green	OK	0	9.18518	inf	#NAME?	0.0021	0.0143469	yes
BnaA07g24530D	chrA07:18353292-18353850	Purple	Green	OK	0	92.5935	inf	#NAME?	5e-05	0.000600056	yes
BnaA07g24560D	chrA07:18360630-18364509	Purple	Green	OK	0.731103	3.0748	2.07235	2.10541	0.01015	0.0495444	yes
BnaA07g24580D	chrA07:18398575-18398932	Purple	Green	OK	0	55.9709	inf	#NAME?	5e-05	0.000600056	yes
BnaA07g24860D	chrA07:18554803-18559818	Purple	Green	OK	51.4274	0.624212	-6.36436	-6.94032	5e-05	0.000600056	yes
BnaA07g24880D	chrA07:18569889-18571424	Purple	Green	OK	290.6	0.71545	-8.66597	-7.481	0.001	0.00787399	yes
BnaA07g25780D	chrA07:19059297-19060370	Purple	Green	OK	5.60822	0	#NAME?	#NAME?	5e-05	0.000600056	yes
BnaA07g25940D	chrA07:19139127-19140633	Purple	Green	OK	17.5287	45.7751	1.38484	2.58403	0.0003	0.00287919	yes
BnaA07g26280D	chrA07:19353357-19356690	Purple	Green	OK	0	1.83016	inf	#NAME?	5e-05	0.000600056	yes
BnaA07g26770D	chrA07:19587429-19590881	Purple	Green	OK	8.84459	30.1529	1.76943	3.15169	5e-05	0.000600056	yes
BnaA07g27140D	chrA07:19744580-19751865	Purple	Green	OK	6.09269	0	#NAME?	#NAME?	5e-05	0.000600056	yes
BnaA07g27170D	chrA07:19778847-19779111	Purple	Green	OK	6.37192	0	#NAME?	#NAME?	0.0067	0.0361381	yes
BnaA07g27280D	chrA07:19859719-19860312	Purple	Green	OK	53.7289	578.738	3.42914	6.23496	5e-05	0.000600056	yes
BnaA07g27460D	chrA07:19986822-19989413	Purple	Green	OK	0.962388	11.3948	3.56561	4.11354	0.0001	0.0011169	yes
BnaA07g28540D	chrA07:20618725-20622916	Purple	Green	OK	2.54329	5.95733	1.22797	2.1576	0.00345	0.0212673	yes
BnaA07g28690D	chrA07:20681536-20683492	Purple	Green	OK	7.07917	0.861476	-3.0387	-3.42493	0.0006	0.00517851	yes
BnaA07g28750D	chrA07:20725383-20727422	Purple	Green	OK	0	10.9826	inf	#NAME?	5e-05	0.000600056	yes
BnaA07g28760D	chrA07:20730805-20735700	Purple	Green	OK	0.389981	4.81091	3.62483	3.52534	0.0026	0.0170575	yes
BnaA07g28910D	chrA07:20819757-20822546	Purple	Green	OK	0.872905	3.68127	2.07631	2.48196	0.00425	0.0251261	yes
BnaA07g29230D	chrA07:20976869-20978291	Purple	Green	OK	0	5.35155	inf	#NAME?	5e-05	0.000600056	yes
BnaA07g29240D	chrA07:20978630-20984599	Purple	Green	OK	0	4.85223	inf	#NAME?	5e-05	0.000600056	yes
BnaA07g29830D	chrA07:21259369-21261735	Purple	Green	OK	2.8721	0	#NAME?	#NAME?	5e-05	0.000600056	yes
BnaA07g30010D	chrA07:21349836-21350508	Purple	Green	OK	77.8595	0	#NAME?	#NAME?	5e-05	0.000600056	yes
BnaA07g30040D	chrA07:21363402-21364910	Purple	Green	OK	331.403	1.80194	-7.52289	-7.77368	5e-05	0.000600056	yes
BnaA07g30580D	chrA07:21620916-21623052	Purple	Green	OK	7.19671	20.5868	1.51631	2.4754	0.00095	0.00758084	yes
BnaA07g31010D	chrA07:21795553-21796839	Purple	Green	OK	0	9.55741	inf	#NAME?	5e-05	0.000600056	yes
BnaA07g31260D	chrA07:21915494-21916511	Purple	Green	OK	33.3849	1.47209	-4.50326	-4.7739	0.0001	0.0011169	yes
BnaA07g31370D	chrA07:21950908-21952287	Purple	Green	OK	13.4498	0	#NAME?	#NAME?	5e-05	0.000600056	yes
BnaA07g31880D	chrA07:22141901-22143076	Purple	Green	OK	4.51315	0	#NAME?	#NAME?	5e-05	0.000600056	yes
BnaA07g31930D	chrA07:22225999-22229611	Purple	Green	OK	0	8.44561	inf	#NAME?	5e-05	0.000600056	yes
BnaA07g31990D	chrA07:22255613-22256522	Purple	Green	OK	9.39504	3.11575	-1.59232	-1.98965	0.0095	0.0472055	yes
BnaA07g32000D	chrA07:22259376-22259643	Purple	Green	OK	7.54776	0	#NAME?	#NAME?	0.0006	0.00517851	yes
BnaA07g32050D	chrA07:22285987-22287829	Purple	Green	OK	0	2.62546	inf	#NAME?	5e-05	0.000600056	yes
BnaA07g32060D	chrA07:22288551-22289050	Purple	Green	OK	0	25.7459	inf	#NAME?	5e-05	0.000600056	yes
BnaA07g32090D	chrA07:22295033-22297618	Purple	Green	OK	8.25182	1.67121	-2.30382	-2.7351	0.0013	0.00977745	yes
BnaA07g32220D	chrA07:22365022-22367628	Purple	Green	OK	0	28.0261	inf	#NAME?	5e-05	0.000600056	yes
BnaA07g32230D	chrA07:22370567-22371424	Purple	Green	OK	0	4.34532	inf	#NAME?	5e-05	0.000600056	yes
BnaA07g32320D	chrA07:22443248-22443761	Purple	Green	OK	0	85.1772	inf	#NAME?	5e-05	0.000600056	yes
BnaA07g32560D	chrA07:22524407-22525436	Purple	Green	OK	2.7848	0	#NAME?	#NAME?	0.007	0.0372671	yes
BnaA07g32570D	chrA07:22527394-22528526	Purple	Green	OK	58.9312	0	#NAME?	#NAME?	5e-05	0.000600056	yes
BnaA07g33060D	chrA07:22741447-22743167	Purple	Green	OK	126.244	19.8553	-2.66862	-4.22668	5e-05	0.000600056	yes
BnaA07g33080D	chrA07:22754711-22755466	Purple	Green	OK	0	15.4696	inf	#NAME?	5e-05	0.000600056	yes
BnaA07g33090D	chrA07:22766346-22768206	Purple	Green	OK	0	5.93823	inf	#NAME?	5e-05	0.000600056	yes
BnaA07g33260D	chrA07:22864095-22865677	Purple	Green	OK	0	8.41819	inf	#NAME?	5e-05	0.000600056	yes
BnaA07g33590D	chrA07:23003749-23006334	Purple	Green	OK	6.94956	0.386257	-4.16929	-3.90447	0.0049	0.0280381	yes
BnaA07g34180D	chrA07:23301687-23303681	Purple	Green	OK	0	19.0834	inf	#NAME?	5e-05	0.000600056	yes
BnaA07g34280D	chrA07:23365678-23366756	Purple	Green	OK	50.4667	122.898	1.28406	2.58541	0.00035	0.00329203	yes
BnaA07g34290D	chrA07:23367643-23370074	Purple	Green	OK	8.43959	3.00746	-1.48863	-2.20303	0.00345	0.0212673	yes
BnaA07g34490D	chrA07:23426464-23430143	Purple	Green	OK	20.7524	7.92656	-1.38851	-2.60654	0.0004	0.0036951	yes
BnaA07g34710D	chrA07:23540266-23541450	Purple	Green	OK	14.5787	2.40732	-2.59837	-2.64728	0.0043	0.0253329	yes
BnaA07g35790D	chrA07:23955442-23956326	Purple	Green	OK	6.71106	1.32209	-2.34372	-2.21981	0.00685	0.0366756	yes
BnaA07g35970D	chrA07_random:29397-31924	Purple	Green	OK	0	5.9397	inf	#NAME?	5e-05	0.000600056	yes
BnaA07g36110D	chrA07_random:122704-130341	Purple	Green	OK	4.81702	1.80259	-1.41807	-2.08345	0.00395	0.0237155	yes
BnaA07g36780D	chrA07_random:676036-678559	Purple	Green	OK	5.51266	0.535389	-3.36409	-3.42517	0.0012	0.00912598	yes
BnaA07g37340D	chrA07_random:1013079-1014607	Purple	Green	OK	241.908	109.98	-1.13722	-2.17148	0.00395	0.0237155	yes
BnaA07g37490D	chrA07_random:1113661-1114191	Purple	Green	OK	0	6.89623	inf	#NAME?	0.0101	0.0493756	yes
BnaA07g37520D	chrA07_random:1134686-1135136	Purple	Green	OK	131.891	47.2637	-1.48054	-2.72811	0.0002	0.00205349	yes
BnaA07g37630D	chrA07_random:1209519-1211655	Purple	Green	OK	4.53566	1.04792	-2.11379	-2.14831	0.00995	0.0489483	yes
BnaA07g37730D	chrA07_random:1252823-1254287	Purple	Green	OK	19.302	80.348	2.05751	3.75813	5e-05	0.000600056	yes
BnaA07g37920D	chrA07_random:1359724-1362070	Purple	Green	OK	3.36482	0.279026	-3.59206	-3.3631	0.00235	0.0157264	yes
BnaA07g37980D	chrA07_random:1392609-1394725	Purple	Green	OK	3.36029	0	#NAME?	#NAME?	5e-05	0.000600056	yes
BnaA07g38010D	chrA07_random:1409137-1411463	Purple	Green	OK	9.55102	0	#NAME?	#NAME?	5e-05	0.000600056	yes
BnaA07g38160D	chrA07_random:1500833-1502369	Purple	Green	OK	7.99492	2.41766	-1.72547	-2.07513	0.00815	0.0420622	yes
BnaA07g38250D	chrA07_random:1534391-1540570	Purple	Green	OK	2.23488	18.1785	3.02396	5.09823	5e-05	0.000600056	yes
BnaA07g38350D	chrA07_random:1588643-1590691	Purple	Green	OK	0	2.80662	inf	#NAME?	5e-05	0.000600056	yes
BnaA07g38480D	chrA07_random:1652471-1654264	Purple	Green	OK	17.1229	5.79703	-1.56254	-2.06667	0.00645	0.0350967	yes
BnaA07g38540D	chrA07_random:1693426-1695357	Purple	Green	OK	25.9357	0.91724	-4.82149	-5.40696	5e-05	0.000600056	yes
BnaA07g38550D	chrA07_random:1701486-1705439	Purple	Green	OK	14.5438	0	#NAME?	#NAME?	5e-05	0.000600056	yes
BnaA07g38610D	chrA07_random:1748315-1749824	Purple	Green	OK	4.76513	0.972041	-2.29343	-2.3741	0.0057	0.0316826	yes
BnaA07g38720D	chrA07_random:1805659-1805986	Purple	Green	OK	0	3.73665	inf	#NAME?	0.0028	0.0180555	yes
BnaA07g38770D	chrA07_random:1843211-1845271	Purple	Green	OK	6.26527	2.50008	-1.3254	-1.93446	0.0094	0.0468393	yes
BnaA07g38860D	chrA07_random:1887513-1888429	Purple	Green	OK	0	5.81533	inf	#NAME?	5e-05	0.000600056	yes
BnaA07g38870D	chrA07_random:1889069-1889510	Purple	Green	OK	8.75819	69.6023	2.99043	3.80534	0.00015	0.00159108	yes
BnaA07g39020D	chrA07_random:1955821-1959764	Purple	Green	OK	0	1.7716	inf	#NAME?	5e-05	0.000600056	yes
BnaA07g39030D	chrA07_random:1960470-1962480	Purple	Green	OK	0	1.92445	inf	#NAME?	5e-05	0.000600056	yes
BnaA07g39050D	chrA07_random:1969406-1971752	Purple	Green	OK	2.21676	0	#NAME?	#NAME?	5e-05	0.000600056	yes
BnaA07g39080D	chrA07_random:1977717-1977927	Purple	Green	OK	17.3593	0	#NAME?	#NAME?	0.0002	0.00205349	yes
BnaA07g39210D	chrA07_random:2034465-2036018	Purple	Green	OK	2.06148	0	#NAME?	#NAME?	5e-05	0.000600056	yes
BnaA08g00200D	chrA08:158756-160707	Purple	Green	OK	0	22.8418	inf	#NAME?	5e-05	0.000600056	yes
BnaA08g00380D	chrA08:250701-251187	Purple	Green	OK	32.9483	126.717	1.94334	3.26012	5e-05	0.000600056	yes
BnaA08g00450D	chrA08:286775-291310	Purple	Green	OK	59.5686	0.309134	-7.59017	-7.77575	0.00155	0.0112947	yes
BnaA08g00460D	chrA08:292731-293290	Purple	Green	OK	4.39649	0	#NAME?	#NAME?	0.00135	0.0100731	yes
BnaA08g00530D	chrA08:327469-335541	Purple	Green	OK	0	4.33435	inf	#NAME?	5e-05	0.000600056	yes
BnaA08g00670D	chrA08:471256-473529	Purple	Green	OK	0	9.86483	inf	#NAME?	5e-05	0.000600056	yes
BnaA08g00800D	chrA08:549268-554092	Purple	Green	OK	7.55882	0.425484	-4.15098	-4.22841	0.00025	0.0024567	yes
BnaA08g01320D	chrA08:1017728-1020403	Purple	Green	OK	2.61202	0	#NAME?	#NAME?	5e-05	0.000600056	yes
BnaA08g01580D	chrA08:1315770-1316143	Purple	Green	OK	0	6.21359	inf	#NAME?	0.00135	0.0100731	yes
BnaA08g01880D	chrA08:1528957-1529582	Purple	Green	OK	10.5342	0	#NAME?	#NAME?	0.0044	0.0257799	yes
BnaA08g01930D	chrA08:1540035-1543144	Purple	Green	OK	2.83136	8.09345	1.51526	2.15609	0.00595	0.0327992	yes
BnaA08g04440D	chrA08:3917311-3919763	Purple	Green	OK	9.47872	19.8495	1.06634	1.9381	0.00955	0.0474025	yes
BnaA08g04610D	chrA08:4361951-4364449	Purple	Green	OK	14.3419	93.2873	2.70144	5.04157	5e-05	0.000600056	yes
BnaA08g04820D	chrA08:4620627-4621775	Purple	Green	OK	167.291	925.584	2.46801	3.93379	5e-05	0.000600056	yes
BnaA08g05660D	chrA08:5553479-5555924	Purple	Green	OK	39.3747	3.6159	-3.44484	-4.9863	5e-05	0.000600056	yes
BnaA08g06670D	chrA08:6671048-6673278	Purple	Green	OK	20.8605	6.72573	-1.63301	-2.63964	0.00045	0.00408286	yes
BnaA08g07200D	chrA08:7202914-7206664	Purple	Green	OK	0.705014	2.80335	1.99143	2.1689	0.01015	0.0495444	yes
BnaA08g07360D	chrA08:7385045-7387029	Purple	Green	OK	1.64259	8.67896	2.40155	2.82495	0.00115	0.00882952	yes
BnaA08g07620D	chrA08:7564095-7565460	Purple	Green	OK	2.15252	0	#NAME?	#NAME?	5e-05	0.000600056	yes
BnaA08g07690D	chrA08:7603337-7608027	Purple	Green	OK	7.84282	24.2165	1.62655	3.03665	5e-05	0.000600056	yes
BnaA08g08790D	chrA08:8539426-8541628	Purple	Green	OK	3.92067	9.57755	1.28856	2.04393	0.0066	0.0357249	yes
BnaA08g09180D	chrA08:8827457-8830154	Purple	Green	OK	24.2468	0	#NAME?	#NAME?	5e-05	0.000600056	yes
BnaA08g09640D	chrA08:9173391-9173787	Purple	Green	OK	2.9113	0	#NAME?	#NAME?	0.00155	0.0112947	yes
BnaA08g10860D	chrA08:10034549-10035880	Purple	Green	OK	8.49363	47.5406	2.48471	3.99283	5e-05	0.000600056	yes
BnaA08g10930D	chrA08:10081088-10082486	Purple	Green	OK	0	5.35921	inf	#NAME?	5e-05	0.000600056	yes
BnaA08g10940D	chrA08:10087679-10090070	Purple	Green	OK	10.2462	1.24939	-3.03579	-3.70136	0.0006	0.00517851	yes
BnaA08g11040D	chrA08:10144864-10146255	Purple	Green	OK	18.6305	51.5632	1.46867	2.73172	0.00045	0.00408286	yes
BnaA08g11320D	chrA08:10296499-10298525	Purple	Green	OK	9.71097	2.42107	-2.00397	-2.89988	0.00025	0.0024567	yes
BnaA08g11390D	chrA08:10334356-10335888	Purple	Green	OK	9.4283	1.74289	-2.43551	-2.91857	0.00035	0.00329203	yes
BnaA08g11580D	chrA08:10479715-10480798	Purple	Green	OK	9.54107	31.5255	1.72429	2.5638	0.0012	0.00912598	yes
BnaA08g11970D	chrA08:10704104-10705103	Purple	Green	OK	0	2.13177	inf	#NAME?	0.0028	0.0180555	yes
BnaA08g12140D	chrA08:10858903-10860980	Purple	Green	OK	5.9436	0	#NAME?	#NAME?	5e-05	0.000600056	yes
BnaA08g12150D	chrA08:10861872-10866786	Purple	Green	OK	2.59261	0	#NAME?	#NAME?	5e-05	0.000600056	yes
BnaA08g12170D	chrA08:10883635-10885118	Purple	Green	OK	8.42136	0	#NAME?	#NAME?	5e-05	0.000600056	yes
BnaA08g12620D	chrA08:11150656-11151960	Purple	Green	OK	0	1.93285	inf	#NAME?	5e-05	0.000600056	yes
BnaA08g12690D	chrA08:11215930-11220392	Purple	Green	OK	0	1.94275	inf	#NAME?	5e-05	0.000600056	yes
BnaA08g12980D	chrA08:11356038-11357466	Purple	Green	OK	6.63421	21.8763	1.72137	2.30541	0.0034	0.0210237	yes
BnaA08g13340D	chrA08:11599225-11600575	Purple	Green	OK	172.152	4.96603	-5.11545	-6.27209	5e-05	0.000600056	yes
BnaA08g13880D	chrA08:11903007-11911105	Purple	Green	OK	1.19667	6.87372	2.52206	4.22917	5e-05	0.000600056	yes
BnaA08g14160D	chrA08:12091309-12094876	Purple	Green	OK	0	2.31941	inf	#NAME?	5e-05	0.000600056	yes
BnaA08g14210D	chrA08:12135365-12138291	Purple	Green	OK	0	7.52812	inf	#NAME?	5e-05	0.000600056	yes
BnaA08g14580D	chrA08:12298332-12299427	Purple	Green	OK	0	2.58775	inf	#NAME?	0.0047	0.0271408	yes
BnaA08g14930D	chrA08:12520305-12521610	Purple	Green	OK	53.5525	13.8258	-1.95359	-3.67349	5e-05	0.000600056	yes
BnaA08g15090D	chrA08:12620055-12620548	Purple	Green	OK	2.95948	0	#NAME?	#NAME?	0.001	0.00787399	yes
BnaA08g15110D	chrA08:12630119-12630722	Purple	Green	OK	0	3.13589	inf	#NAME?	5e-05	0.000600056	yes
BnaA08g15660D	chrA08:13008479-13010357	Purple	Green	OK	2.1496	0	#NAME?	#NAME?	5e-05	0.000600056	yes
BnaA08g15880D	chrA08:13151311-13152117	Purple	Green	OK	1.68513	21.0023	3.63961	3.84075	0.0008	0.00659907	yes
BnaA08g15920D	chrA08:13196523-13198778	Purple	Green	OK	17.671	6.33411	-1.48017	-2.2885	0.0026	0.0170575	yes
BnaA08g16980D	chrA08:13638513-13640524	Purple	Green	OK	1.95847	9.40932	2.26436	2.66912	0.00225	0.0151935	yes
BnaA08g17070D	chrA08:13674181-13675806	Purple	Green	OK	2.75956	0	#NAME?	#NAME?	5e-05	0.000600056	yes
BnaA08g17080D	chrA08:13676300-13677124	Purple	Green	OK	10.0426	0	#NAME?	#NAME?	5e-05	0.000600056	yes
BnaA08g17140D	chrA08:13723244-13725557	Purple	Green	OK	1.83137	7.51502	2.03686	2.6764	0.001	0.00787399	yes
BnaA08g17430D	chrA08:13897493-13900055	Purple	Green	OK	45.4366	22.5386	-1.01146	-2.03075	0.0046	0.0266738	yes
BnaA08g17700D	chrA08:14039052-14040174	Purple	Green	OK	0	5.16024	inf	#NAME?	5e-05	0.000600056	yes
BnaA08g18090D	chrA08:14229178-14230132	Purple	Green	OK	0	4.51485	inf	#NAME?	5e-05	0.000600056	yes
BnaA08g18500D	chrA08:14460635-14465538	Purple	Green	OK	4.43502	0.821628	-2.43238	-2.5011	0.0057	0.0316826	yes
BnaA08g18670D	chrA08:14539542-14540204	Purple	Green	OK	0	11.1852	inf	#NAME?	5e-05	0.000600056	yes
BnaA08g18750D	chrA08:14573697-14578059	Purple	Green	OK	2.00072	0.624971	-1.67866	-1.95337	0.009	0.0454538	yes
BnaA08g19760D	chrA08:15102008-15102884	Purple	Green	OK	0	12.6511	inf	#NAME?	5e-05	0.000600056	yes
BnaA08g21160D	chrA08:15747618-15748860	Purple	Green	OK	0	11.1299	inf	#NAME?	5e-05	0.000600056	yes
BnaA08g21500D	chrA08:15896587-15897713	Purple	Green	OK	6.65808	0	#NAME?	#NAME?	5e-05	0.000600056	yes
BnaA08g21730D	chrA08:15997879-16000994	Purple	Green	OK	10.5817	0.62348	-4.08509	-4.20596	0.00065	0.00553406	yes
BnaA08g21880D	chrA08:16036733-16039840	Purple	Green	OK	2.92363	10.0515	1.78158	2.35158	0.00575	0.0318666	yes
BnaA08g22200D	chrA08:16221798-16222764	Purple	Green	OK	2.395	0	#NAME?	#NAME?	5e-05	0.000600056	yes
BnaA08g23070D	chrA08:16556774-16558956	Purple	Green	OK	0	3.49335	inf	#NAME?	5e-05	0.000600056	yes
BnaA08g23240D	chrA08:16625256-16630052	Purple	Green	OK	2.91011	0	#NAME?	#NAME?	5e-05	0.000600056	yes
BnaA08g23360D	chrA08:16664150-16665317	Purple	Green	OK	0	5.28477	inf	#NAME?	5e-05	0.000600056	yes
BnaA08g24010D	chrA08:16938715-16939526	Purple	Green	OK	5.11421	0	#NAME?	#NAME?	5e-05	0.000600056	yes
BnaA08g24040D	chrA08:16944117-16945103	Purple	Green	OK	9.32596	34.5893	1.891	2.73949	0.0012	0.00912598	yes
BnaA08g24270D	chrA08:17019971-17023892	Purple	Green	OK	0	6.7301	inf	#NAME?	5e-05	0.000600056	yes
BnaA08g24360D	chrA08:17061636-17063920	Purple	Green	OK	6.711	0	#NAME?	#NAME?	5e-05	0.000600056	yes
BnaA08g24440D	chrA08:17099118-17100936	Purple	Green	OK	5.75247	0	#NAME?	#NAME?	5e-05	0.000600056	yes
BnaA08g24540D	chrA08:17131400-17131733	Purple	Green	OK	18.5704	0	#NAME?	#NAME?	5e-05	0.000600056	yes
BnaA08g24600D	chrA08:17150492-17152346	Purple	Green	OK	1.2308	5.80031	2.23653	2.19383	0.0076	0.0398069	yes
BnaA08g24770D	chrA08:17213918-17216174	Purple	Green	OK	3.82986	1.35265	-1.5015	-2.02491	0.0071	0.0376805	yes
BnaA08g25340D	chrA08:17452029-17455484	Purple	Green	OK	72.9395	234.019	1.68185	2.83897	0.00065	0.00553406	yes
BnaA08g25450D	chrA08:17511519-17511714	Purple	Green	OK	32.8746	0	#NAME?	#NAME?	5e-05	0.000600056	yes
BnaA08g25830D	chrA08:17676124-17679826	Purple	Green	OK	5.01498	0.448969	-3.48156	-3.84731	0.00105	0.00819322	yes
BnaA08g25840D	chrA08:17680051-17682142	Purple	Green	OK	15.1954	3.5069	-2.11537	-2.52223	0.00165	0.0118456	yes
BnaA08g26010D	chrA08:17733782-17735597	Purple	Green	OK	0	7.02185	inf	#NAME?	5e-05	0.000600056	yes
BnaA08g26240D	chrA08:17825576-17827480	Purple	Green	OK	7.21251	0	#NAME?	#NAME?	5e-05	0.000600056	yes
BnaA08g26430D	chrA08:17892870-17895762	Purple	Green	OK	3.00615	0	#NAME?	#NAME?	5e-05	0.000600056	yes
BnaA08g26480D	chrA08:17913750-17915145	Purple	Green	OK	6.3902	0	#NAME?	#NAME?	5e-05	0.000600056	yes
BnaA08g26550D	chrA08:17932766-17933814	Purple	Green	OK	2.95376	0	#NAME?	#NAME?	5e-05	0.000600056	yes
BnaA08g26620D	chrA08:17958377-17960375	Purple	Green	OK	2.42161	13.8946	2.52048	3.19094	0.0003	0.00287919	yes
BnaA08g26940D	chrA08:18108800-18111480	Purple	Green	OK	11.0482	1.76469	-2.64633	-3.58268	0.00015	0.00159108	yes
BnaA08g27140D	chrA08:18179622-18181165	Purple	Green	OK	8.04714	1.98799	-2.01717	-2.31819	0.0063	0.0344442	yes
BnaA08g27590D	chrA08:18340537-18341338	Purple	Green	OK	4.54711	0	#NAME?	#NAME?	5e-05	0.000600056	yes
BnaA08g27620D	chrA08:18351480-18353144	Purple	Green	OK	0	1.95474	inf	#NAME?	5e-05	0.000600056	yes
BnaA08g28620D	chrA08:18764973-18767405	Purple	Green	OK	7.41353	14.432	0.961039	1.82413	0.00925	0.0462644	yes
BnaA08g29450D	chrA08_random:280960-281497	Purple	Green	OK	0	4.5406	inf	#NAME?	5e-05	0.000600056	yes
BnaA08g29950D	chrA08_random:1059049-1061123	Purple	Green	OK	8.54816	40.1558	2.23192	4.0112	5e-05	0.000600056	yes
BnaA08g30050D	chrA08_random:1203253-1204672	Purple	Green	OK	10.9723	28.1181	1.35763	1.96141	0.01	0.049149	yes
BnaA08g30390D	chrA08_random:1468364-1476317	Purple	Green	OK	0.249139	19.2443	6.27133	5.53504	0.00995	0.0489483	yes
BnaA08g30750D	chrA08_random:1687674-1688148	Purple	Green	OK	0	7.55088	inf	#NAME?	5e-05	0.000600056	yes
BnaA08g31180D	chrA08_random:1877914-1879793	Purple	Green	OK	9.91976	112.275	3.50059	6.08954	5e-05	0.000600056	yes
BnaA08g31310D	chrA08_random:1950576-1952368	Purple	Green	OK	16.4008	0	#NAME?	#NAME?	5e-05	0.000600056	yes
BnaA08g31360D	chrA08_random:1972558-1973134	Purple	Green	OK	12.1101	0	#NAME?	#NAME?	5e-05	0.000600056	yes
BnaA08g31400D	chrA08_random:1982313-1984200	Purple	Green	OK	2.64055	0	#NAME?	#NAME?	5e-05	0.000600056	yes
BnaA08g31650D	chrA08_random:2073460-2077661	Purple	Green	OK	5.73829	0	#NAME?	#NAME?	5e-05	0.000600056	yes
BnaA09g00220D	chrA09:104381-105356	Purple	Green	OK	1.83556	0	#NAME?	#NAME?	5e-05	0.000600056	yes
BnaA09g00260D	chrA09:118535-120074	Purple	Green	OK	2.13662	6.75524	1.66068	2.31621	0.00395	0.0237155	yes
BnaA09g00670D	chrA09:375689-378006	Purple	Green	OK	2.30196	0	#NAME?	#NAME?	5e-05	0.000600056	yes
BnaA09g00680D	chrA09:379260-380254	Purple	Green	OK	45.4289	7.53547	-2.59184	-3.58256	5e-05	0.000600056	yes
BnaA09g00880D	chrA09:530729-531954	Purple	Green	OK	7.61153	0	#NAME?	#NAME?	5e-05	0.000600056	yes
BnaA09g00900D	chrA09:537918-540033	Purple	Green	OK	17.3452	0	#NAME?	#NAME?	5e-05	0.000600056	yes
BnaA09g00920D	chrA09:544315-544875	Purple	Green	OK	0	9.42521	inf	#NAME?	0.00015	0.00159108	yes
BnaA09g01040D	chrA09:589784-590743	Purple	Green	OK	5.69057	0	#NAME?	#NAME?	0.00015	0.00159108	yes
BnaA09g01050D	chrA09:591207-591910	Purple	Green	OK	0	35.8138	inf	#NAME?	5e-05	0.000600056	yes
BnaA09g01140D	chrA09:648791-651195	Purple	Green	OK	1.63764	9.05977	2.46785	2.9352	0.0011	0.00852321	yes
BnaA09g01200D	chrA09:674263-675859	Purple	Green	OK	4.60679	0	#NAME?	#NAME?	5e-05	0.000600056	yes
BnaA09g01980D	chrA09:995082-997753	Purple	Green	OK	1.55672	5.65101	1.86	2.26516	0.0041	0.024424	yes
BnaA09g02060D	chrA09:1019551-1021880	Purple	Green	OK	5.13955	1.08705	-2.24123	-2.37457	0.0053	0.0298737	yes
BnaA09g02560D	chrA09:1308036-1309158	Purple	Green	OK	2.21073	0	#NAME?	#NAME?	0.0001	0.0011169	yes
BnaA09g02570D	chrA09:1318791-1320766	Purple	Green	OK	2.66921	0	#NAME?	#NAME?	5e-05	0.000600056	yes
BnaA09g02780D	chrA09:1421277-1426999	Purple	Green	OK	3.23317	0	#NAME?	#NAME?	5e-05	0.000600056	yes
BnaA09g02790D	chrA09:1428189-1430092	Purple	Green	OK	2.05637	0	#NAME?	#NAME?	5e-05	0.000600056	yes
BnaA09g02840D	chrA09:1439819-1440322	Purple	Green	OK	32.4845	358.21	3.46298	5.07924	5e-05	0.000600056	yes
BnaA09g03030D	chrA09:1544686-1545178	Purple	Green	OK	4.05669	0	#NAME?	#NAME?	5e-05	0.000600056	yes
BnaA09g03130D	chrA09:1586464-1587953	Purple	Green	OK	0	18.6351	inf	#NAME?	5e-05	0.000600056	yes
BnaA09g04060D	chrA09:2029994-2034607	Purple	Green	OK	3.01886	9.59256	1.66791	2.88519	0.00015	0.00159108	yes
BnaA09g04070D	chrA09:2035553-2039303	Purple	Green	OK	5.77602	1.38183	-2.0635	-2.64878	0.00115	0.00882952	yes
BnaA09g04190D	chrA09:2080917-2084829	Purple	Green	OK	3.79462	12.0023	1.66128	2.87619	0.0002	0.00205349	yes
BnaA09g04240D	chrA09:2093545-2098947	Purple	Green	OK	1.79949	6.29602	1.80685	2.62166	0.0006	0.00517851	yes
BnaA09g04280D	chrA09:2110719-2112608	Purple	Green	OK	8.00396	0.617936	-3.69518	-3.17313	0.00515	0.0292753	yes
BnaA09g04830D	chrA09:2377938-2379576	Purple	Green	OK	5.12287	31.6567	2.62749	4.05614	5e-05	0.000600056	yes
BnaA09g05200D	chrA09:2556172-2562821	Purple	Green	OK	0.303037	3.02774	3.32068	3.49298	0.00145	0.0107096	yes
BnaA09g05250D	chrA09:2576521-2578231	Purple	Green	OK	3.83309	0	#NAME?	#NAME?	5e-05	0.000600056	yes
BnaA09g05620D	chrA09:2760764-2761821	Purple	Green	OK	0	102.354	inf	#NAME?	5e-05	0.000600056	yes
BnaA09g05660D	chrA09:2771092-2773253	Purple	Green	OK	0	3.34873	inf	#NAME?	5e-05	0.000600056	yes
BnaA09g05930D	chrA09:2891452-2894554	Purple	Green	OK	0	4.90455	inf	#NAME?	5e-05	0.000600056	yes
BnaA09g06240D	chrA09:3079541-3082371	Purple	Green	OK	0.52137	4.19791	3.00929	2.79116	0.0043	0.0253329	yes
BnaA09g06680D	chrA09:3274073-3275892	Purple	Green	OK	11.8813	2.35467	-2.3351	-3.03031	0.0004	0.0036951	yes
BnaA09g06810D	chrA09:3327387-3328667	Purple	Green	OK	64.0381	0	#NAME?	#NAME?	5e-05	0.000600056	yes
BnaA09g06900D	chrA09:3355248-3358442	Purple	Green	OK	0.491886	16.3457	5.05444	5.83659	0.0001	0.0011169	yes
BnaA09g06960D	chrA09:3383286-3383890	Purple	Green	OK	7.19739	0	#NAME?	#NAME?	0.00035	0.00329203	yes
BnaA09g07020D	chrA09:3441495-3442987	Purple	Green	OK	0	3.46586	inf	#NAME?	5e-05	0.000600056	yes
BnaA09g07040D	chrA09:3445737-3449539	Purple	Green	OK	6.484	0	#NAME?	#NAME?	5e-05	0.000600056	yes
BnaA09g07240D	chrA09:3590282-3591783	Purple	Green	OK	0	34.6207	inf	#NAME?	5e-05	0.000600056	yes
BnaA09g07840D	chrA09:3815713-3817166	Purple	Green	OK	4.41189	80.4997	4.18951	5.67939	5e-05	0.000600056	yes
BnaA09g08140D	chrA09:3926810-3935148	Purple	Green	OK	2.21815	0.840124	-1.40068	-1.94692	0.01	0.049149	yes
BnaA09g08190D	chrA09:3976176-3977019	Purple	Green	OK	212.408	772.515	1.86273	2.63101	0.0003	0.00287919	yes
BnaA09g08290D	chrA09:4055193-4056791	Purple	Green	OK	0	78.0073	inf	#NAME?	5e-05	0.000600056	yes
BnaA09g08310D	chrA09:4071146-4071492	Purple	Green	OK	0	7.99235	inf	#NAME?	0.0004	0.0036951	yes
BnaA09g08390D	chrA09:4120082-4121722	Purple	Green	OK	0	1.7927	inf	#NAME?	5e-05	0.000600056	yes
BnaA09g08410D	chrA09:4131494-4132743	Purple	Green	OK	24.5565	6.08751	-2.01218	-2.84706	0.00025	0.0024567	yes
BnaA09g08450D	chrA09:4164319-4165060	Purple	Green	OK	0	4.48157	inf	#NAME?	5e-05	0.000600056	yes
BnaA09g08460D	chrA09:4165778-4169014	Purple	Green	OK	10.6129	4.07553	-1.38076	-2.03057	0.0081	0.0418716	yes
BnaA09g08470D	chrA09:4182340-4184997	Purple	Green	OK	651.249	124.924	-2.38215	-2.21321	0.00405	0.0242071	yes
BnaA09g08530D	chrA09:4262963-4264968	Purple	Green	OK	2.13	5.74968	1.43263	2.05113	0.00645	0.0350967	yes
BnaA09g08790D	chrA09:4390788-4391985	Purple	Green	OK	0	10.4979	inf	#NAME?	5e-05	0.000600056	yes
BnaA09g09800D	chrA09:4958175-4959211	Purple	Green	OK	2.65118	0	#NAME?	#NAME?	0.0025	0.0165232	yes
BnaA09g09840D	chrA09:5004869-5005379	Purple	Green	OK	5.46531	31.796	2.54047	3.06301	0.00135	0.0100731	yes
BnaA09g09870D	chrA09:5021137-5023575	Purple	Green	OK	3.01744	0	#NAME?	#NAME?	5e-05	0.000600056	yes
BnaA09g09910D	chrA09:5043668-5045642	Purple	Green	OK	6.07853	1.04263	-2.5435	-3.19484	0.0007	0.00589401	yes
BnaA09g09950D	chrA09:5057261-5058639	Purple	Green	OK	44.368	10.7593	-2.04394	-3.2597	5e-05	0.000600056	yes
BnaA09g09960D	chrA09:5059288-5059901	Purple	Green	OK	6.19846	0	#NAME?	#NAME?	5e-05	0.000600056	yes
BnaA09g10120D	chrA09:5168877-5169021	Purple	Green	OK	0	57.8595	inf	#NAME?	0.0101	0.0493756	yes
BnaA09g10660D	chrA09:5434374-5437973	Purple	Green	OK	9.66978	27.7717	1.52206	2.74047	0.0002	0.00205349	yes
BnaA09g11110D	chrA09:5744234-5746895	Purple	Green	OK	5.541	15.1359	1.44975	2.72745	5e-05	0.000600056	yes
BnaA09g11470D	chrA09:5895796-5896696	Purple	Green	OK	18.8976	0	#NAME?	#NAME?	5e-05	0.000600056	yes
BnaA09g11600D	chrA09:5955504-5956479	Purple	Green	OK	7.07307	36.4002	2.36354	3.58938	0.0001	0.0011169	yes
BnaA09g12260D	chrA09:6417625-6420451	Purple	Green	OK	1.93797	0	#NAME?	#NAME?	5e-05	0.000600056	yes
BnaA09g12570D	chrA09:6663337-6665809	Purple	Green	OK	1.45778	7.97254	2.45127	2.74046	0.00685	0.0366756	yes
BnaA09g12720D	chrA09:6771852-6773478	Purple	Green	OK	10.1321	66.5898	2.71637	4.26333	5e-05	0.000600056	yes
BnaA09g12770D	chrA09:6802254-6804837	Purple	Green	OK	0.736663	3.47692	2.23873	2.73678	0.00155	0.0112947	yes
BnaA09g13190D	chrA09:7212916-7218433	Purple	Green	OK	43.8172	13.7872	-1.66817	-2.99977	0.0001	0.0011169	yes
BnaA09g13230D	chrA09:7272078-7273005	Purple	Green	OK	55.37	3.11192	-4.15323	-5.37964	5e-05	0.000600056	yes
BnaA09g13710D	chrA09:7796753-7797767	Purple	Green	OK	2.59067	13.6487	2.39737	2.88732	0.00115	0.00882952	yes
BnaA09g14100D	chrA09:8067006-8068948	Purple	Green	OK	6.6388	0	#NAME?	#NAME?	5e-05	0.000600056	yes
BnaA09g14820D	chrA09:8581222-8583299	Purple	Green	OK	3.14188	11.7754	1.90608	2.9809	5e-05	0.000600056	yes
BnaA09g15320D	chrA09:8907011-8907479	Purple	Green	OK	75.3461	0	#NAME?	#NAME?	5e-05	0.000600056	yes
BnaA09g15400D	chrA09:8960289-8962867	Purple	Green	OK	65.798	20.905	-1.6542	-3.01716	0.0001	0.0011169	yes
BnaA09g15410D	chrA09:8966006-8966921	Purple	Green	OK	24.8329	8.43287	-1.55816	-2.20514	0.0032	0.0200305	yes
BnaA09g15430D	chrA09:8977792-8978880	Purple	Green	OK	105.83	315.291	1.57494	2.96259	5e-05	0.000600056	yes
BnaA09g15710D	chrA09:9168554-9170111	Purple	Green	OK	261.95	7.44427	-5.13701	-8.15564	5e-05	0.000600056	yes
BnaA09g16310D	chrA09:9708543-9708840	Purple	Green	OK	0	4.04838	inf	#NAME?	0.0052	0.0294654	yes
BnaA09g16400D	chrA09:9769206-9770709	Purple	Green	OK	0	2.75583	inf	#NAME?	5e-05	0.000600056	yes
BnaA09g16850D	chrA09:10134217-10134657	Purple	Green	OK	0	10.1259	inf	#NAME?	5e-05	0.000600056	yes
BnaA09g17250D	chrA09:10407941-10409116	Purple	Green	OK	2.73121	0	#NAME?	#NAME?	0.0006	0.00517851	yes
BnaA09g18200D	chrA09:11302996-11304520	Purple	Green	OK	8.65483	3.46065	-1.32246	-2.01449	0.0055	0.0308006	yes
BnaA09g18310D	chrA09:11412560-11418504	Purple	Green	OK	2.57822	0.808677	-1.67274	-2.33563	0.0029	0.0186068	yes
BnaA09g18720D	chrA09:11670441-11671125	Purple	Green	OK	3.04087	0	#NAME?	#NAME?	0.0009	0.00726139	yes
BnaA09g18770D	chrA09:11707989-11709410	Purple	Green	OK	2.08535	8.46693	2.02155	2.39413	0.00335	0.0207586	yes
BnaA09g19120D	chrA09:12018178-12019982	Purple	Green	OK	2.55319	0	#NAME?	#NAME?	5e-05	0.000600056	yes
BnaA09g19310D	chrA09:12278879-12280171	Purple	Green	OK	2.00762	0	#NAME?	#NAME?	5e-05	0.000600056	yes
BnaA09g19450D	chrA09:12482026-12485823	Purple	Green	OK	9.11281	19.2965	1.08237	2.0684	0.00395	0.0237155	yes
BnaA09g19510D	chrA09:12597467-12599734	Purple	Green	OK	5.63147	0	#NAME?	#NAME?	5e-05	0.000600056	yes
BnaA09g19570D	chrA09:12631509-12632368	Purple	Green	OK	2.90733	0	#NAME?	#NAME?	5e-05	0.000600056	yes
BnaA09g19810D	chrA09:12798156-12798666	Purple	Green	OK	0	59.6853	inf	#NAME?	5e-05	0.000600056	yes
BnaA09g19870D	chrA09:12817917-12819353	Purple	Green	OK	152.934	742.877	2.28022	3.80071	5e-05	0.000600056	yes
BnaA09g19990D	chrA09:12977990-12978670	Purple	Green	OK	2.31041	0	#NAME?	#NAME?	0.0005	0.00447196	yes
BnaA09g20220D	chrA09:13165389-13169528	Purple	Green	OK	0.323576	2.44415	2.91716	2.6996	0.00535	0.0301237	yes
BnaA09g20270D	chrA09:13194957-13203242	Purple	Green	OK	11.6407	4.30728	-1.43432	-2.2379	0.0031	0.019515	yes
BnaA09g20300D	chrA09:13213427-13215781	Purple	Green	OK	1.72071	5.55833	1.69165	2.16041	0.0065	0.035273	yes
BnaA09g20320D	chrA09:13220383-13221511	Purple	Green	OK	2.28511	24.4898	3.42184	4.55438	5e-05	0.000600056	yes
BnaA09g20790D	chrA09:13555919-13559102	Purple	Green	OK	6.47418	2.25848	-1.51935	-2.25475	0.0033	0.0205242	yes
BnaA09g22340D	chrA09:14895654-14900016	Purple	Green	OK	4.01694	1.39006	-1.53095	-2.02735	0.0099	0.0487697	yes
BnaA09g22540D	chrA09:15065480-15066611	Purple	Green	OK	588.382	3424.73	2.54116	2.39719	0.009	0.0454538	yes
BnaA09g22770D	chrA09:15334969-15336484	Purple	Green	OK	5.14686	0	#NAME?	#NAME?	5e-05	0.000600056	yes
BnaA09g22800D	chrA09:15393540-15394850	Purple	Green	OK	4.40409	0	#NAME?	#NAME?	5e-05	0.000600056	yes
BnaA09g22830D	chrA09:15430430-15432226	Purple	Green	OK	18.1558	0	#NAME?	#NAME?	5e-05	0.000600056	yes
BnaA09g22850D	chrA09:15447737-15448946	Purple	Green	OK	8.52984	0	#NAME?	#NAME?	5e-05	0.000600056	yes
BnaA09g22980D	chrA09:15578767-15580125	Purple	Green	OK	3.21267	0	#NAME?	#NAME?	5e-05	0.000600056	yes
BnaA09g23380D	chrA09:16027883-16028765	Purple	Green	OK	7.71464	24.9531	1.69355	2.20627	0.0068	0.0364871	yes
BnaA09g24540D	chrA09:17243374-17244820	Purple	Green	OK	0	4.07463	inf	#NAME?	5e-05	0.000600056	yes
BnaA09g24750D	chrA09:17541992-17543021	Purple	Green	OK	5.03938	0.597019	-3.0774	-2.77075	0.00925	0.0462644	yes
BnaA09g24940D	chrA09:17673127-17678860	Purple	Green	OK	21.39	10.4113	-1.03879	-2.07678	0.0043	0.0253329	yes
BnaA09g26570D	chrA09:19808471-19809275	Purple	Green	OK	33.6972	235.107	2.80262	5.07508	5e-05	0.000600056	yes
BnaA09g27060D	chrA09:20155187-20155979	Purple	Green	OK	6.62534	0	#NAME?	#NAME?	5e-05	0.000600056	yes
BnaA09g27350D	chrA09:20488446-20489392	Purple	Green	OK	0	81.1593	inf	#NAME?	5e-05	0.000600056	yes
BnaA09g27390D	chrA09:20547079-20549023	Purple	Green	OK	323.254	23.2632	-3.79655	-6.39599	5e-05	0.000600056	yes
BnaA09g28400D	chrA09:21286542-21287173	Purple	Green	OK	8.48421	0	#NAME?	#NAME?	0.00475	0.0273163	yes
BnaA09g28460D	chrA09:21341532-21346489	Purple	Green	OK	3.54943	0.924786	-1.94039	-2.49777	0.00285	0.0183337	yes
BnaA09g28870D	chrA09:21738273-21738979	Purple	Green	OK	11.6137	0	#NAME?	#NAME?	5e-05	0.000600056	yes
BnaA09g29540D	chrA09:22127221-22128032	Purple	Green	OK	10.916	1.09367	-3.3192	-2.9655	0.00815	0.0420622	yes
BnaA09g30040D	chrA09:22378819-22379458	Purple	Green	OK	2.62708	21.6838	3.04509	3.20983	0.0031	0.019515	yes
BnaA09g30650D	chrA09:22813338-22815779	Purple	Green	OK	6.38653	21.5354	1.7536	2.88554	0.0002	0.00205349	yes
BnaA09g31220D	chrA09:23246923-23249387	Purple	Green	OK	4.20976	13.1923	1.64788	2.60963	0.001	0.00787399	yes
BnaA09g31260D	chrA09:23277664-23279034	Purple	Green	OK	0	2.78432	inf	#NAME?	5e-05	0.000600056	yes
BnaA09g31310D	chrA09:23366032-23367759	Purple	Green	OK	0	2.85908	inf	#NAME?	5e-05	0.000600056	yes
BnaA09g32380D	chrA09:24026231-24029039	Purple	Green	OK	0	6.66938	inf	#NAME?	5e-05	0.000600056	yes
BnaA09g32990D	chrA09:24390129-24391341	Purple	Green	OK	0	5.09116	inf	#NAME?	5e-05	0.000600056	yes
BnaA09g33230D	chrA09:24525914-24529533	Purple	Green	OK	35.8089	7.00543	-2.35377	-3.99143	5e-05	0.000600056	yes
BnaA09g33390D	chrA09:24630646-24631456	Purple	Green	OK	19.402	1.71092	-3.50337	-2.98432	0.00345	0.0212673	yes
BnaA09g33760D	chrA09:24824855-24826238	Purple	Green	OK	12.4546	89.3343	2.84253	5.06529	5e-05	0.000600056	yes
BnaA09g33960D	chrA09:24950108-24950913	Purple	Green	OK	8.81839	0	#NAME?	#NAME?	5e-05	0.000600056	yes
BnaA09g33970D	chrA09:24951911-24953302	Purple	Green	OK	13.6202	5.33948	-1.35097	-2.05151	0.0065	0.035273	yes
BnaA09g34110D	chrA09:25059557-25061610	Purple	Green	OK	0	3.56381	inf	#NAME?	5e-05	0.000600056	yes
BnaA09g34200D	chrA09:25102518-25113719	Purple	Green	OK	1.83815	0.472319	-1.96042	-2.6935	0.00105	0.00819322	yes
BnaA09g34260D	chrA09:25141919-25142695	Purple	Green	OK	0	4.39653	inf	#NAME?	0.0088	0.0446406	yes
BnaA09g34700D	chrA09:25400111-25405803	Purple	Green	OK	2.07101	0.316121	-2.71178	-2.98221	0.00235	0.0157264	yes
BnaA09g34730D	chrA09:25411877-25412399	Purple	Green	OK	1.74814	0	#NAME?	#NAME?	0.00155	0.0112947	yes
BnaA09g34830D	chrA09:25453896-25456133	Purple	Green	OK	10.4658	3.33854	-1.64839	-2.54246	0.00095	0.00758084	yes
BnaA09g34900D	chrA09:25506709-25507709	Purple	Green	OK	23.1336	3.09543	-2.90178	-3.0559	0.00305	0.0193026	yes
BnaA09g34940D	chrA09:25521699-25522962	Purple	Green	OK	1.44735	10.662	2.881	3.074	0.0047	0.0271408	yes
BnaA09g35230D	chrA09:25683306-25687536	Purple	Green	OK	6.49232	1.55506	-2.06176	-2.96946	0.00055	0.00481964	yes
BnaA09g35340D	chrA09:25799747-25800608	Purple	Green	OK	5.98774	0	#NAME?	#NAME?	5e-05	0.000600056	yes
BnaA09g35380D	chrA09:25809183-25811005	Purple	Green	OK	17.053	68.688	2.01004	3.84621	5e-05	0.000600056	yes
BnaA09g35540D	chrA09:25960114-25960663	Purple	Green	OK	2.16673	0	#NAME?	#NAME?	0.00065	0.00553406	yes
BnaA09g35650D	chrA09:26004692-26006731	Purple	Green	OK	2.6286	11.1299	2.08207	2.53946	0.006	0.0330407	yes
BnaA09g36140D	chrA09:26223897-26228267	Purple	Green	OK	0	5.77204	inf	#NAME?	5e-05	0.000600056	yes
BnaA09g36210D	chrA09:26267431-26268032	Purple	Green	OK	4.53393	20.6673	2.18852	2.41771	0.00585	0.0323369	yes
BnaA09g36240D	chrA09:26271669-26276695	Purple	Green	OK	3.55017	8.33465	1.23123	2.15973	0.00295	0.0188296	yes
BnaA09g36400D	chrA09:26351115-26356720	Purple	Green	OK	2.31161	0.189568	-3.60811	-3.69978	0.00185	0.0130048	yes
BnaA09g37290D	chrA09:26857080-26859356	Purple	Green	OK	0.694024	11.9098	4.10102	4.1078	0.0009	0.00726139	yes
BnaA09g37730D	chrA09:27137039-27137689	Purple	Green	OK	8.03871	0	#NAME?	#NAME?	5e-05	0.000600056	yes
BnaA09g37890D	chrA09:27197596-27198180	Purple	Green	OK	41.2277	0	#NAME?	#NAME?	5e-05	0.000600056	yes
BnaA09g38120D	chrA09:27302200-27305659	Purple	Green	OK	0	3.84409	inf	#NAME?	5e-05	0.000600056	yes
BnaA09g38150D	chrA09:27320831-27321175	Purple	Green	OK	12.1807	0	#NAME?	#NAME?	0.0001	0.0011169	yes
BnaA09g38220D	chrA09:27348705-27351675	Purple	Green	OK	7.29598	0	#NAME?	#NAME?	5e-05	0.000600056	yes
BnaA09g38240D	chrA09:27353195-27355902	Purple	Green	OK	2.23371	0	#NAME?	#NAME?	5e-05	0.000600056	yes
BnaA09g38270D	chrA09:27389068-27392520	Purple	Green	OK	7.35722	1.66557	-2.14314	-2.99746	0.00045	0.00408286	yes
BnaA09g38330D	chrA09:27412253-27413346	Purple	Green	OK	18.9756	76.4826	2.01099	3.14819	5e-05	0.000600056	yes
BnaA09g38450D	chrA09:27453902-27455290	Purple	Green	OK	9.01466	0	#NAME?	#NAME?	5e-05	0.000600056	yes
BnaA09g38620D	chrA09:27562786-27564734	Purple	Green	OK	1.83267	0	#NAME?	#NAME?	0.0001	0.0011169	yes
BnaA09g38720D	chrA09:27615346-27618047	Purple	Green	OK	3.82573	27.9652	2.86983	4.4686	5e-05	0.000600056	yes
BnaA09g39200D	chrA09:27815787-27816309	Purple	Green	OK	0	1.71555	inf	#NAME?	0.0028	0.0180555	yes
BnaA09g39830D	chrA09:28141174-28147928	Purple	Green	OK	7.73854	21.1035	1.44735	2.5077	0.001	0.00787399	yes
BnaA09g39920D	chrA09:28166059-28167177	Purple	Green	OK	0	1.87541	inf	#NAME?	0.0019	0.0132805	yes
BnaA09g40650D	chrA09:28550708-28552778	Purple	Green	OK	0	20.2437	inf	#NAME?	5e-05	0.000600056	yes
BnaA09g40930D	chrA09:28657150-28658200	Purple	Green	OK	0	2.93823	inf	#NAME?	5e-05	0.000600056	yes
BnaA09g41030D	chrA09:28711477-28714082	Purple	Green	OK	7.52087	2.92184	-1.36402	-1.99441	0.008	0.0414415	yes
BnaA09g41070D	chrA09:28738046-28740585	Purple	Green	OK	7.86574	0	#NAME?	#NAME?	5e-05	0.000600056	yes
BnaA09g41160D	chrA09:28808173-28809030	Purple	Green	OK	0	9.59832	inf	#NAME?	5e-05	0.000600056	yes
BnaA09g41460D	chrA09:28964617-28968296	Purple	Green	OK	25.508	65.2419	1.35485	2.29811	0.0023	0.0154433	yes
BnaA09g41570D	chrA09:29022961-29025312	Purple	Green	OK	22.2787	11.2534	-0.98531	-1.87659	0.0099	0.0487697	yes
BnaA09g42190D	chrA09:29350732-29351601	Purple	Green	OK	6.43373	0	#NAME?	#NAME?	5e-05	0.000600056	yes
BnaA09g42220D	chrA09:29360951-29363509	Purple	Green	OK	12.188	27.1725	1.15669	2.12369	0.00515	0.0292753	yes
BnaA09g42380D	chrA09:29509617-29514412	Purple	Green	OK	2.11289	16.8227	2.99311	4.82867	5e-05	0.000600056	yes
BnaA09g42520D	chrA09:29606018-29607238	Purple	Green	OK	11.5035	0	#NAME?	#NAME?	5e-05	0.000600056	yes
BnaA09g43060D	chrA09:29923410-29924196	Purple	Green	OK	0	8.82904	inf	#NAME?	5e-05	0.000600056	yes
BnaA09g43110D	chrA09:29941572-29942578	Purple	Green	OK	0	3.37901	inf	#NAME?	5e-05	0.000600056	yes
BnaA09g43380D	chrA09:30072251-30074082	Purple	Green	OK	5.15355	0	#NAME?	#NAME?	5e-05	0.000600056	yes
BnaA09g43570D	chrA09:30141795-30143151	Purple	Green	OK	2.43497	8.67057	1.83222	2.37446	0.00375	0.0227491	yes
BnaA09g43650D	chrA09:30165641-30167079	Purple	Green	OK	2.49944	0	#NAME?	#NAME?	5e-05	0.000600056	yes
BnaA09g43820D	chrA09:30224065-30226242	Purple	Green	OK	1.86979	0	#NAME?	#NAME?	5e-05	0.000600056	yes
BnaA09g43840D	chrA09:30233945-30235096	Purple	Green	OK	2.81921	17.9185	2.66809	3.3542	0.00055	0.00481964	yes
BnaA09g44020D	chrA09:30316481-30317059	Purple	Green	OK	23.9086	0	#NAME?	#NAME?	5e-05	0.000600056	yes
BnaA09g44030D	chrA09:30317705-30318375	Purple	Green	OK	11.1751	0	#NAME?	#NAME?	5e-05	0.000600056	yes
BnaA09g44990D	chrA09:30825600-30825939	Purple	Green	OK	2.91022	0	#NAME?	#NAME?	0.00445	0.0259779	yes
BnaA09g45030D	chrA09:30879071-30881945	Purple	Green	OK	0	4.63924	inf	#NAME?	5e-05	0.000600056	yes
BnaA09g45050D	chrA09:30885434-30887274	Purple	Green	OK	0	11.609	inf	#NAME?	5e-05	0.000600056	yes
BnaA09g45580D	chrA09:31176593-31178255	Purple	Green	OK	5.54264	0	#NAME?	#NAME?	5e-05	0.000600056	yes
BnaA09g45770D	chrA09:31230634-31231585	Purple	Green	OK	2.73071	35.0804	3.68332	3.9974	0.0005	0.00447196	yes
BnaA09g45900D	chrA09:31291563-31293441	Purple	Green	OK	1.66027	7.76002	2.22464	2.69846	0.0031	0.019515	yes
BnaA09g45910D	chrA09:31293872-31294738	Purple	Green	OK	0	3.16141	inf	#NAME?	5e-05	0.000600056	yes
BnaA09g46280D	chrA09:31487099-31488492	Purple	Green	OK	2.24308	0	#NAME?	#NAME?	5e-05	0.000600056	yes
BnaA09g46410D	chrA09:31534187-31536153	Purple	Green	OK	10.4753	24.8078	1.24381	2.20398	0.00315	0.019787	yes
BnaA09g46650D	chrA09:31638255-31639865	Purple	Green	OK	0	4.83386	inf	#NAME?	5e-05	0.000600056	yes
BnaA09g46700D	chrA09:31651647-31653159	Purple	Green	OK	0	2.57825	inf	#NAME?	5e-05	0.000600056	yes
BnaA09g46760D	chrA09:31673839-31680143	Purple	Green	OK	0	2.03569	inf	#NAME?	5e-05	0.000600056	yes
BnaA09g46830D	chrA09:31697585-31704467	Purple	Green	OK	3.30302	8.72255	1.40096	2.17372	0.0034	0.0210237	yes
BnaA09g47020D	chrA09:31749035-31750547	Purple	Green	OK	0	5.60201	inf	#NAME?	5e-05	0.000600056	yes
BnaA09g47060D	chrA09:31773359-31775400	Purple	Green	OK	0	4.52343	inf	#NAME?	5e-05	0.000600056	yes
BnaA09g47140D	chrA09:31806289-31814115	Purple	Green	OK	44.5791	16.9622	-1.39404	-2.52892	0.00085	0.00692421	yes
BnaA09g47150D	chrA09:31814486-31815381	Purple	Green	OK	3.3923	0	#NAME?	#NAME?	0.0009	0.00726139	yes
BnaA09g47280D	chrA09:31873030-31874108	Purple	Green	OK	0	2.13747	inf	#NAME?	5e-05	0.000600056	yes
BnaA09g47340D	chrA09:31917000-31919281	Purple	Green	OK	1.90005	0	#NAME?	#NAME?	5e-05	0.000600056	yes
BnaA09g47480D	chrA09:31996359-31998151	Purple	Green	OK	0	3.48104	inf	#NAME?	5e-05	0.000600056	yes
BnaA09g47510D	chrA09:32004345-32006888	Purple	Green	OK	6.34964	75.8443	3.57829	5.75547	5e-05	0.000600056	yes
BnaA09g47520D	chrA09:32010112-32011593	Purple	Green	OK	0	1.77376	inf	#NAME?	5e-05	0.000600056	yes
BnaA09g47750D	chrA09:32136028-32144387	Purple	Green	OK	0.473777	6.97401	3.87971	5.21847	5e-05	0.000600056	yes
BnaA09g48050D	chrA09:32265537-32266066	Purple	Green	OK	0	9.09068	inf	#NAME?	5e-05	0.000600056	yes
BnaA09g48180D	chrA09:32321919-32323882	Purple	Green	OK	1.80189	0	#NAME?	#NAME?	5e-05	0.000600056	yes
BnaA09g48220D	chrA09:32345555-32346543	Purple	Green	OK	13.5238	2.72409	-2.31165	-2.57454	0.0033	0.0205242	yes
BnaA09g48320D	chrA09:32399796-32400494	Purple	Green	OK	23.4534	107.247	2.19306	4.00442	5e-05	0.000600056	yes
BnaA09g48780D	chrA09:32607029-32609834	Purple	Green	OK	6.8259	1.00565	-2.7629	-3.17084	0.00145	0.0107096	yes
BnaA09g48920D	chrA09:32667913-32668531	Purple	Green	OK	176.202	841.716	2.25611	4.01004	5e-05	0.000600056	yes
BnaA09g48990D	chrA09:32704521-32706950	Purple	Green	OK	4.27888	0	#NAME?	#NAME?	5e-05	0.000600056	yes
BnaA09g49140D	chrA09:32765355-32766360	Purple	Green	OK	10.9874	37.0215	1.75252	2.75825	0.0008	0.00659907	yes
BnaA09g49520D	chrA09:32935767-32936909	Purple	Green	OK	38.1001	15.8889	-1.26178	-2.24147	0.00195	0.013518	yes
BnaA09g49800D	chrA09:33060040-33061604	Purple	Green	OK	1.72263	0	#NAME?	#NAME?	5e-05	0.000600056	yes
BnaA09g50100D	chrA09:33214994-33215358	Purple	Green	OK	21.4572	0	#NAME?	#NAME?	0.00015	0.00159108	yes
BnaA09g50130D	chrA09:33219594-33224664	Purple	Green	OK	3.17888	0.430055	-2.88593	-3.12792	0.0014	0.0103858	yes
BnaA09g50230D	chrA09:33265416-33266221	Purple	Green	OK	0	11.0736	inf	#NAME?	5e-05	0.000600056	yes
BnaA09g50530D	chrA09:33396520-33397782	Purple	Green	OK	0	1.81862	inf	#NAME?	5e-05	0.000600056	yes
BnaA09g50640D	chrA09:33454668-33456743	Purple	Green	OK	0	4.18943	inf	#NAME?	5e-05	0.000600056	yes
BnaA09g50890D	chrA09:33572081-33574297	Purple	Green	OK	22.51	0	#NAME?	#NAME?	5e-05	0.000600056	yes
BnaA09g50920D	chrA09:33580844-33582622	Purple	Green	OK	5.47638	40.8421	2.89876	4.78493	5e-05	0.000600056	yes
BnaA09g51060D	chrA09:33650345-33654302	Purple	Green	OK	2.02249	5.8822	1.54022	2.36408	0.00165	0.0118456	yes
BnaA09g51230D	chrA09:33710261-33712534	Purple	Green	OK	0	2.80448	inf	#NAME?	5e-05	0.000600056	yes
BnaA09g51540D	chrA09:33834540-33837716	Purple	Green	OK	2.86799	8.20535	1.51653	2.16217	0.00425	0.0251261	yes
BnaA09g51670D	chrA09_random:46628-49195	Purple	Green	OK	15.2242	77.4735	2.34734	4.40422	5e-05	0.000600056	yes
BnaA09g51690D	chrA09_random:51545-52612	Purple	Green	OK	0	4.67264	inf	#NAME?	5e-05	0.000600056	yes
BnaA09g51700D	chrA09_random:56580-59628	Purple	Green	OK	1.92867	0	#NAME?	#NAME?	5e-05	0.000600056	yes
BnaA09g51970D	chrA09_random:172222-173627	Purple	Green	OK	4.98558	27.1632	2.44582	3.78273	5e-05	0.000600056	yes
BnaA09g52020D	chrA09_random:203608-204290	Purple	Green	OK	3.45874	0	#NAME?	#NAME?	0.00305	0.0193026	yes
BnaA09g52790D	chrA09_random:639156-641839	Purple	Green	OK	33.1121	94.2059	1.50846	2.77323	0.0001	0.0011169	yes
BnaA09g52810D	chrA09_random:653314-655348	Purple	Green	OK	0	1.74776	inf	#NAME?	5e-05	0.000600056	yes
BnaA09g52920D	chrA09_random:745088-746982	Purple	Green	OK	8.28456	3.14822	-1.39589	-1.94412	0.0089	0.0450125	yes
BnaA09g52940D	chrA09_random:758754-761121	Purple	Green	OK	15.0776	4.45364	-1.75935	-2.67266	0.0003	0.00287919	yes
BnaA09g53020D	chrA09_random:819599-821480	Purple	Green	OK	3.93394	0	#NAME?	#NAME?	5e-05	0.000600056	yes
BnaA09g53100D	chrA09_random:888545-890148	Purple	Green	OK	10.5894	4.47395	-1.243	-1.90051	0.00825	0.042503	yes
BnaA09g53540D	chrA09_random:1323345-1328660	Purple	Green	OK	2.39708	0	#NAME?	#NAME?	5e-05	0.000600056	yes
BnaA09g53640D	chrA09_random:1456409-1462761	Purple	Green	OK	2.66119	0.882019	-1.59319	-2.30591	0.003	0.0190614	yes
BnaA09g53660D	chrA09_random:1466432-1468629	Purple	Green	OK	2.26417	0	#NAME?	#NAME?	5e-05	0.000600056	yes
BnaA09g53820D	chrA09_random:1712413-1714573	Purple	Green	OK	2.60224	0	#NAME?	#NAME?	5e-05	0.000600056	yes
BnaA09g54000D	chrA09_random:2310058-2312213	Purple	Green	OK	1.16216	25.7712	4.47088	5.58421	5e-05	0.000600056	yes
BnaA09g54040D	chrA09_random:2337264-2337639	Purple	Green	OK	0	3.04382	inf	#NAME?	0.0021	0.0143469	yes
BnaA09g54380D	chrA09_random:2541876-2543103	Purple	Green	OK	7.1372	0	#NAME?	#NAME?	5e-05	0.000600056	yes
BnaA09g54810D	chrA09_random:2816464-2818760	Purple	Green	OK	11.7351	0	#NAME?	#NAME?	5e-05	0.000600056	yes
BnaA09g54820D	chrA09_random:2819118-2824202	Purple	Green	OK	5.15163	0	#NAME?	#NAME?	5e-05	0.000600056	yes
BnaA09g55080D	chrA09_random:3039659-3042045	Purple	Green	OK	1.16199	10.2622	3.14267	3.44011	0.0002	0.00205349	yes
BnaA09g55150D	chrA09_random:3063468-3064232	Purple	Green	OK	29.7853	75.5601	1.34302	2.46481	0.001	0.00787399	yes
BnaA09g55660D	chrA09_random:3355115-3356694	Purple	Green	OK	11.9558	3.82871	-1.64278	-2.3928	0.00145	0.0107096	yes
BnaA09g55820D	chrA09_random:3433583-3441198	Purple	Green	OK	0.381462	1.96502	2.36494	2.85039	0.00135	0.0100731	yes
BnaA09g56240D	chrA09_random:3650396-3653173	Purple	Green	OK	7.55525	1.47406	-2.35768	-2.69358	0.0026	0.0170575	yes
BnaA09g56780D	chrA09_random:3884727-3885580	Purple	Green	OK	0	7.55539	inf	#NAME?	5e-05	0.000600056	yes
BnaA10g00030D	chrA10:27214-28831	Purple	Green	OK	3.20552	0.740849	-2.11331	-2.21733	0.01015	0.0495444	yes
BnaA10g00040D	chrA10:29148-32538	Purple	Green	OK	3.5201	0	#NAME?	#NAME?	5e-05	0.000600056	yes
BnaA10g00130D	chrA10:67413-72342	Purple	Green	OK	6.83143	2.89669	-1.23778	-1.99815	0.00605	0.0332646	yes
BnaA10g00360D	chrA10:183463-184503	Purple	Green	OK	8.42812	0	#NAME?	#NAME?	5e-05	0.000600056	yes
BnaA10g00370D	chrA10:186506-188939	Purple	Green	OK	5.01833	0	#NAME?	#NAME?	5e-05	0.000600056	yes
BnaA10g00410D	chrA10:213860-214913	Purple	Green	OK	0	6.04396	inf	#NAME?	5e-05	0.000600056	yes
BnaA10g00590D	chrA10:296057-297503	Purple	Green	OK	7.54313	0	#NAME?	#NAME?	5e-05	0.000600056	yes
BnaA10g01200D	chrA10:632622-634340	Purple	Green	OK	9.35112	34.4616	1.88178	3.1224	0.00015	0.00159108	yes
BnaA10g01370D	chrA10:734000-734979	Purple	Green	OK	4.54572	0	#NAME?	#NAME?	5e-05	0.000600056	yes
BnaA10g01470D	chrA10:760638-761975	Purple	Green	OK	2.5914	0	#NAME?	#NAME?	5e-05	0.000600056	yes
BnaA10g01500D	chrA10:776862-777231	Purple	Green	OK	2.47622	0	#NAME?	#NAME?	0.00475	0.0273163	yes
BnaA10g01730D	chrA10:871107-874630	Purple	Green	OK	1.99711	17.6083	3.14027	3.67596	0.0002	0.00205349	yes
BnaA10g01820D	chrA10:905203-906118	Purple	Green	OK	14.6801	75.3307	2.35938	3.07396	0.00065	0.00553406	yes
BnaA10g01960D	chrA10:972428-974171	Purple	Green	OK	0	7.28699	inf	#NAME?	5e-05	0.000600056	yes
BnaA10g02050D	chrA10:1025297-1027102	Purple	Green	OK	14.0286	30.5069	1.12076	2.10206	0.00365	0.0222859	yes
BnaA10g02230D	chrA10:1165019-1165772	Purple	Green	OK	4.81925	33.0952	2.77974	3.82259	5e-05	0.000600056	yes
BnaA10g02780D	chrA10:1453810-1455571	Purple	Green	OK	3.4174	0	#NAME?	#NAME?	5e-05	0.000600056	yes
BnaA10g02830D	chrA10:1465445-1469000	Purple	Green	OK	6.78266	0	#NAME?	#NAME?	5e-05	0.000600056	yes
BnaA10g02850D	chrA10:1477618-1479012	Purple	Green	OK	7.1583	2.21734	-1.69079	-2.03743	0.0074	0.0389694	yes
BnaA10g03140D	chrA10:1602165-1603155	Purple	Green	OK	3.80088	0	#NAME?	#NAME?	0.0001	0.0011169	yes
BnaA10g03290D	chrA10:1659869-1661289	Purple	Green	OK	3.08658	0	#NAME?	#NAME?	5e-05	0.000600056	yes
BnaA10g04360D	chrA10:2297229-2298311	Purple	Green	OK	32.2738	228.594	2.82435	4.57686	5e-05	0.000600056	yes
BnaA10g04510D	chrA10:2413730-2414600	Purple	Green	OK	6.83689	43.1747	2.65877	3.80714	0.0002	0.00205349	yes
BnaA10g04520D	chrA10:2415234-2416864	Purple	Green	OK	2.60761	0	#NAME?	#NAME?	5e-05	0.000600056	yes
BnaA10g04770D	chrA10:2556220-2557182	Purple	Green	OK	1.9958	19.1062	3.259	3.80884	0.0013	0.00977745	yes
BnaA10g05390D	chrA10:3091944-3094189	Purple	Green	OK	10.2324	0.437371	-4.54814	-4.0911	0.0042	0.0248948	yes
BnaA10g05830D	chrA10:4006177-4007673	Purple	Green	OK	1.68529	0	#NAME?	#NAME?	0.00025	0.0024567	yes
BnaA10g05930D	chrA10:4137453-4140493	Purple	Green	OK	5.26649	0	#NAME?	#NAME?	5e-05	0.000600056	yes
BnaA10g06360D	chrA10:4846992-4847854	Purple	Green	OK	14.9726	65.0441	2.11909	3.38702	5e-05	0.000600056	yes
BnaA10g07350D	chrA10:5777349-5778320	Purple	Green	OK	126.961	975.891	2.94233	4.39584	5e-05	0.000600056	yes
BnaA10g08360D	chrA10:7128581-7130328	Purple	Green	OK	20.4499	43.1994	1.07892	2.02879	0.00475	0.0273163	yes
BnaA10g08390D	chrA10:7150523-7151541	Purple	Green	OK	52.7868	216.146	2.03376	3.97919	5e-05	0.000600056	yes
BnaA10g08410D	chrA10:7163789-7164654	Purple	Green	OK	0	3.70104	inf	#NAME?	0.00055	0.00481964	yes
BnaA10g08550D	chrA10:7260836-7262182	Purple	Green	OK	235.928	674.582	1.51565	2.55824	0.0011	0.00852321	yes
BnaA10g09070D	chrA10:8017710-8018285	Purple	Green	OK	27.7071	107.681	1.95844	3.06143	0.0002	0.00205349	yes
BnaA10g09470D	chrA10:8321329-8323974	Purple	Green	OK	2.76644	0.44239	-2.64464	-2.52431	0.0092	0.0461007	yes
BnaA10g10480D	chrA10:8936300-8938841	Purple	Green	OK	5.82175	0	#NAME?	#NAME?	5e-05	0.000600056	yes
BnaA10g10740D	chrA10:9084661-9085002	Purple	Green	OK	12.8697	0	#NAME?	#NAME?	5e-05	0.000600056	yes
BnaA10g11500D	chrA10:9656938-9657664	Purple	Green	OK	13.6634	2.159	-2.66189	-2.71536	0.00505	0.028768	yes
BnaA10g11760D	chrA10:9837332-9839959	Purple	Green	OK	2.48336	0	#NAME?	#NAME?	5e-05	0.000600056	yes
BnaA10g11850D	chrA10:9898976-9900364	Purple	Green	OK	0	2.05725	inf	#NAME?	5e-05	0.000600056	yes
BnaA10g11900D	chrA10:9914192-9919039	Purple	Green	OK	0.414639	2.26518	2.4497	2.73139	0.00285	0.0183337	yes
BnaA10g11910D	chrA10:9919515-9921861	Purple	Green	OK	0	2.40112	inf	#NAME?	5e-05	0.000600056	yes
BnaA10g11920D	chrA10:9922761-9924251	Purple	Green	OK	0.953823	16.1296	4.07985	3.9417	0.0009	0.00726139	yes
BnaA10g12270D	chrA10:10156148-10157587	Purple	Green	OK	0	13.0199	inf	#NAME?	5e-05	0.000600056	yes
BnaA10g12370D	chrA10:10215569-10216391	Purple	Green	OK	2.61769	9.10109	1.79775	2.1707	0.00655	0.0355082	yes
BnaA10g12500D	chrA10:10279853-10281029	Purple	Green	OK	0	12.3557	inf	#NAME?	5e-05	0.000600056	yes
BnaA10g13070D	chrA10:10596400-10598410	Purple	Green	OK	0	1.79058	inf	#NAME?	5e-05	0.000600056	yes
BnaA10g13720D	chrA10:11028677-11032005	Purple	Green	OK	3.14152	0	#NAME?	#NAME?	5e-05	0.000600056	yes
BnaA10g13790D	chrA10:11066440-11073561	Purple	Green	OK	3.19643	7.64147	1.25739	2.14159	0.0042	0.0248948	yes
BnaA10g14400D	chrA10:11457889-11458752	Purple	Green	OK	50.6184	0	#NAME?	#NAME?	5e-05	0.000600056	yes
BnaA10g14660D	chrA10:11621148-11622193	Purple	Green	OK	6.67545	18.6565	1.48274	1.95632	0.00985	0.0485682	yes
BnaA10g15270D	chrA10:11928437-11929942	Purple	Green	OK	0	2.4978	inf	#NAME?	5e-05	0.000600056	yes
BnaA10g15420D	chrA10:11988232-11989802	Purple	Green	OK	22.7492	49.9743	1.13537	2.10827	0.0042	0.0248948	yes
BnaA10g15620D	chrA10:12076062-12077410	Purple	Green	OK	10.2411	0	#NAME?	#NAME?	5e-05	0.000600056	yes
BnaA10g15690D	chrA10:12096455-12098066	Purple	Green	OK	0	20.4149	inf	#NAME?	5e-05	0.000600056	yes
BnaA10g16310D	chrA10:12436585-12437824	Purple	Green	OK	2.78497	12.491	2.16516	3.0641	0.00085	0.00692421	yes
BnaA10g16320D	chrA10:12438136-12440170	Purple	Green	OK	3.44734	0	#NAME?	#NAME?	5e-05	0.000600056	yes
BnaA10g16660D	chrA10:12602226-12604263	Purple	Green	OK	1.70783	0	#NAME?	#NAME?	5e-05	0.000600056	yes
BnaA10g16720D	chrA10:12618337-12619823	Purple	Green	OK	40.9941	12.5561	-1.70703	-2.5267	0.0016	0.0115957	yes
BnaA10g16880D	chrA10:12664693-12668170	Purple	Green	OK	78.9839	0.611135	-7.01392	-8.28874	5e-05	0.000600056	yes
BnaA10g17250D	chrA10:12832673-12833880	Purple	Green	OK	7.47849	0	#NAME?	#NAME?	5e-05	0.000600056	yes
BnaA10g17300D	chrA10:12852117-12853138	Purple	Green	OK	1.43142	15.0073	3.39015	3.52015	0.00315	0.019787	yes
BnaA10g17340D	chrA10:12862748-12864543	Purple	Green	OK	4.99794	1.23206	-2.02027	-2.5086	0.00215	0.0146199	yes
BnaA10g17390D	chrA10:12888698-12889088	Purple	Green	OK	5.31766	0	#NAME?	#NAME?	5e-05	0.000600056	yes
BnaA10g17400D	chrA10:12889305-12894635	Purple	Green	OK	3.83509	0	#NAME?	#NAME?	5e-05	0.000600056	yes
BnaA10g17550D	chrA10:12947791-12949344	Purple	Green	OK	1.83645	0	#NAME?	#NAME?	0.0002	0.00205349	yes
BnaA10g17910D	chrA10:13114044-13116552	Purple	Green	OK	9.6114	42.9537	2.15996	3.6156	5e-05	0.000600056	yes
BnaA10g17990D	chrA10:13156913-13157225	Purple	Green	OK	6.41895	0	#NAME?	#NAME?	0.0007	0.00589401	yes
BnaA10g18270D	chrA10:13278262-13279100	Purple	Green	OK	0	32.6348	inf	#NAME?	5e-05	0.000600056	yes
BnaA10g18320D	chrA10:13301039-13304600	Purple	Green	OK	14.0709	0.908417	-3.95321	-4.58767	0.0001	0.0011169	yes
BnaA10g18470D	chrA10:13378529-13379489	Purple	Green	OK	0	17.4156	inf	#NAME?	5e-05	0.000600056	yes
BnaA10g18500D	chrA10:13389278-13390454	Purple	Green	OK	85.9753	333.411	1.95531	3.43492	5e-05	0.000600056	yes
BnaA10g18700D	chrA10:13480402-13481512	Purple	Green	OK	6.8382	1.32799	-2.36437	-2.62032	0.00375	0.0227491	yes
BnaA10g18760D	chrA10:13505779-13507200	Purple	Green	OK	0	3.92738	inf	#NAME?	5e-05	0.000600056	yes
BnaA10g18900D	chrA10:13570505-13571297	Purple	Green	OK	1.47997	9.95968	2.75054	2.73144	0.00705	0.0374835	yes
BnaA10g19050D	chrA10:13669558-13670983	Purple	Green	OK	2.23448	9.10809	2.02721	2.30952	0.00725	0.0383054	yes
BnaA10g19170D	chrA10:13722110-13723861	Purple	Green	OK	1.08114	16.4457	3.92709	3.75543	0.0064	0.0348898	yes
BnaA10g19390D	chrA10:13798631-13799332	Purple	Green	OK	7.52007	26.3499	1.80898	2.3185	0.0036	0.0220225	yes
BnaA10g19430D	chrA10:13805430-13811086	Purple	Green	OK	3.90333	12.0128	1.6218	2.85256	0.0002	0.00205349	yes
BnaA10g19670D	chrA10:13887776-13889039	Purple	Green	OK	43.1565	6.98088	-2.6281	-4.12412	5e-05	0.000600056	yes
BnaA10g20500D	chrA10:14322709-14327671	Purple	Green	OK	8.73262	2.99163	-1.54548	-2.6193	0.00075	0.00624773	yes
BnaA10g20560D	chrA10:14336532-14337818	Purple	Green	OK	7.94709	0	#NAME?	#NAME?	5e-05	0.000600056	yes
BnaA10g20580D	chrA10:14343267-14346145	Purple	Green	OK	2.94289	0	#NAME?	#NAME?	5e-05	0.000600056	yes
BnaA10g20630D	chrA10:14369830-14370413	Purple	Green	OK	52.464	22.9459	-1.19309	-1.95861	0.0076	0.0398069	yes
BnaA10g20730D	chrA10:14409467-14411417	Purple	Green	OK	3.5391	0	#NAME?	#NAME?	5e-05	0.000600056	yes
BnaA10g20960D	chrA10:14527821-14536072	Purple	Green	OK	3.2202	0.260463	-3.628	-4.06533	0.0002	0.00205349	yes
BnaA10g21010D	chrA10:14572842-14574656	Purple	Green	OK	1.32952	34.6889	4.7055	5.28736	0.0006	0.00517851	yes
BnaA10g21040D	chrA10:14588679-14590599	Purple	Green	OK	1.5147	15.2616	3.3328	3.72903	0.0027	0.0175555	yes
BnaA10g21300D	chrA10:14691674-14692850	Purple	Green	OK	2.97005	0	#NAME?	#NAME?	5e-05	0.000600056	yes
BnaA10g21780D	chrA10:14871727-14873450	Purple	Green	OK	2.78851	0	#NAME?	#NAME?	5e-05	0.000600056	yes
BnaA10g21810D	chrA10:14887246-14888913	Purple	Green	OK	2.03132	0	#NAME?	#NAME?	5e-05	0.000600056	yes
BnaA10g21910D	chrA10:14928588-14929989	Purple	Green	OK	5.12806	0	#NAME?	#NAME?	5e-05	0.000600056	yes
BnaA10g21980D	chrA10:14959242-14961933	Purple	Green	OK	1.71581	0	#NAME?	#NAME?	5e-05	0.000600056	yes
BnaA10g22120D	chrA10:15029754-15031464	Purple	Green	OK	0	2.27982	inf	#NAME?	5e-05	0.000600056	yes
BnaA10g22420D	chrA10:15127219-15130133	Purple	Green	OK	0	11.4139	inf	#NAME?	5e-05	0.000600056	yes
BnaA10g22430D	chrA10:15131776-15133174	Purple	Green	OK	8.53431	0	#NAME?	#NAME?	5e-05	0.000600056	yes
BnaA10g22830D	chrA10:15267094-15267735	Purple	Green	OK	6.31944	0	#NAME?	#NAME?	5e-05	0.000600056	yes
BnaA10g22850D	chrA10:15278916-15281026	Purple	Green	OK	2.09546	0	#NAME?	#NAME?	5e-05	0.000600056	yes
BnaA10g23320D	chrA10:15434037-15435575	Purple	Green	OK	0	58.0121	inf	#NAME?	5e-05	0.000600056	yes
BnaA10g23500D	chrA10:15521730-15523745	Purple	Green	OK	49.5101	11.2717	-2.13502	-3.97657	5e-05	0.000600056	yes
BnaA10g24640D	chrA10:16076159-16077758	Purple	Green	OK	1.43157	5.1026	1.83363	2.1621	0.00775	0.0404142	yes
BnaA10g24820D	chrA10:16136370-16139255	Purple	Green	OK	3.89748	0.330041	-3.56182	-2.98089	0.00745	0.0391877	yes
BnaA10g24860D	chrA10:16153991-16157850	Purple	Green	OK	6.0293	0	#NAME?	#NAME?	5e-05	0.000600056	yes
BnaA10g24880D	chrA10:16162200-16163535	Purple	Green	OK	1.97928	0	#NAME?	#NAME?	5e-05	0.000600056	yes
BnaA10g25120D	chrA10:16236485-16237471	Purple	Green	OK	112.874	0	#NAME?	#NAME?	5e-05	0.000600056	yes
BnaA10g25670D	chrA10:16470841-16473343	Purple	Green	OK	3.08474	0	#NAME?	#NAME?	5e-05	0.000600056	yes
BnaA10g25800D	chrA10:16539913-16543629	Purple	Green	OK	6.48361	15.7796	1.28319	2.07802	0.00455	0.0264653	yes
BnaA10g26060D	chrA10:16668869-16676398	Purple	Green	OK	3.6918	16.3167	2.14396	4.15479	5e-05	0.000600056	yes
BnaA10g26250D	chrA10:16750924-16753763	Purple	Green	OK	5.65613	12.5655	1.15158	1.94735	0.0072	0.0381166	yes
BnaA10g26490D	chrA10:16883140-16886903	Purple	Green	OK	3.04362	16.4945	2.43812	3.66198	5e-05	0.000600056	yes
BnaA10g26570D	chrA10:16917518-16920899	Purple	Green	OK	0.585944	3.51339	2.58403	2.46875	0.0078	0.0406221	yes
BnaA10g26640D	chrA10:16947801-16950087	Purple	Green	OK	7.88335	27.8746	1.82207	2.81357	0.00045	0.00408286	yes
BnaA10g26650D	chrA10:16950736-16952389	Purple	Green	OK	2.19371	11.3789	2.37492	3.10576	0.0005	0.00447196	yes
BnaA10g26760D	chrA10:17009710-17011949	Purple	Green	OK	6.74962	0	#NAME?	#NAME?	5e-05	0.000600056	yes
BnaA10g26850D	chrA10:17041517-17042104	Purple	Green	OK	12.709	56.0605	2.14113	2.99062	0.0004	0.0036951	yes
BnaA10g26910D	chrA10:17055694-17059563	Purple	Green	OK	0.688351	2.18478	1.66627	1.95187	0.00875	0.044535	yes
BnaA10g27170D	chrA10:17170845-17171241	Purple	Green	OK	390.427	0	#NAME?	#NAME?	5e-05	0.000600056	yes
BnaA10g27610D	chrA10:17351437-17354984	Purple	Green	OK	3.12727	8.44592	1.43335	1.99061	0.0094	0.0468393	yes
BnaA10g27910D	chrA10_random:219945-220422	Purple	Green	OK	29.4238	75.2339	1.3544	2.18913	0.0038	0.0229828	yes
BnaA10g27930D	chrA10_random:222223-223604	Purple	Green	OK	4.39684	1.09584	-2.00443	-2.14414	0.0079	0.0410296	yes
BnaA10g28000D	chrA10_random:256406-261168	Purple	Green	OK	0.605079	4.38558	2.85757	3.18935	0.0011	0.00852321	yes
BnaA10g28290D	chrA10_random:573292-577861	Purple	Green	OK	1.8147	0	#NAME?	#NAME?	5e-05	0.000600056	yes
BnaA10g29120D	chrA10_random:1565890-1566196	Purple	Green	OK	0	58.2215	inf	#NAME?	5e-05	0.000600056	yes
BnaA10g29870D	chrA10_random:1970650-1973876	Purple	Green	OK	3.5193	11.5064	1.70908	2.86378	0.00035	0.00329203	yes
BnaA10g30380D	chrA10_random:2185794-2187109	Purple	Green	OK	2.27948	0	#NAME?	#NAME?	5e-05	0.000600056	yes
BnaAnng00160D	chrAnn_random:171888-172924	Purple	Green	OK	92.773	498.377	2.42546	4.03031	5e-05	0.000600056	yes
BnaAnng00250D	chrAnn_random:285362-286887	Purple	Green	OK	7.86801	1.69802	-2.21214	-2.47115	0.0048	0.0275396	yes
BnaAnng00450D	chrAnn_random:430600-431597	Purple	Green	OK	0	2.40816	inf	#NAME?	5e-05	0.000600056	yes
BnaAnng00500D	chrAnn_random:442668-445398	Purple	Green	OK	0.455583	3.98397	3.12842	2.97787	0.0028	0.0180555	yes
BnaAnng00560D	chrAnn_random:474964-475546	Purple	Green	OK	44.6328	248.174	2.47518	4.50992	5e-05	0.000600056	yes
BnaAnng00720D	chrAnn_random:549010-551326	Purple	Green	OK	6.51343	1.84841	-1.81713	-2.07453	0.00945	0.0470299	yes
BnaAnng00840D	chrAnn_random:618830-619874	Purple	Green	OK	6.56922	0.992544	-2.72652	-2.83639	0.0039	0.0234725	yes
BnaAnng01000D	chrAnn_random:705800-707410	Purple	Green	OK	3.8879	12.8831	1.72842	2.11836	0.0077	0.0402189	yes
BnaAnng01240D	chrAnn_random:763124-767634	Purple	Green	OK	1.59682	7.71743	2.27292	3.21321	0.0002	0.00205349	yes
BnaAnng01610D	chrAnn_random:904706-906094	Purple	Green	OK	0	3.77048	inf	#NAME?	5e-05	0.000600056	yes
BnaAnng01680D	chrAnn_random:952662-954579	Purple	Green	OK	7.02703	0	#NAME?	#NAME?	5e-05	0.000600056	yes
BnaAnng02080D	chrAnn_random:1480691-1482132	Purple	Green	OK	2.84943	15.5083	2.4443	3.13533	0.00055	0.00481964	yes
BnaAnng02360D	chrAnn_random:1985376-1986501	Purple	Green	OK	5.21453	14.9	1.5147	2.0512	0.0067	0.0361381	yes
BnaAnng02620D	chrAnn_random:2125413-2129742	Purple	Green	OK	8.55847	22.8878	1.41915	2.76454	0.00025	0.0024567	yes
BnaAnng02790D	chrAnn_random:2263790-2265341	Purple	Green	OK	17.9258	0	#NAME?	#NAME?	5e-05	0.000600056	yes
BnaAnng03000D	chrAnn_random:2437993-2441242	Purple	Green	OK	33.5364	14.7739	-1.18268	-2.38148	0.0009	0.00726139	yes
BnaAnng03060D	chrAnn_random:2459720-2460776	Purple	Green	OK	58.6236	14.0745	-2.0584	-3.34329	5e-05	0.000600056	yes
BnaAnng04450D	chrAnn_random:4848295-4850677	Purple	Green	OK	12.4026	0	#NAME?	#NAME?	5e-05	0.000600056	yes
BnaAnng04520D	chrAnn_random:5214140-5215923	Purple	Green	OK	17.1161	86.6073	2.33914	4.13351	5e-05	0.000600056	yes
BnaAnng04730D	chrAnn_random:5420175-5420963	Purple	Green	OK	0	20.7544	inf	#NAME?	5e-05	0.000600056	yes
BnaAnng04870D	chrAnn_random:5461746-5463138	Purple	Green	OK	1.47302	10.8934	2.88661	3.03593	0.0074	0.0389694	yes
BnaAnng05920D	chrAnn_random:6104059-6104921	Purple	Green	OK	8.35251	0	#NAME?	#NAME?	5e-05	0.000600056	yes
BnaAnng05990D	chrAnn_random:6121438-6123808	Purple	Green	OK	4.36563	0.757009	-2.52781	-2.73496	0.0023	0.0154433	yes
BnaAnng06020D	chrAnn_random:6133748-6138271	Purple	Green	OK	0	6.56297	inf	#NAME?	5e-05	0.000600056	yes
BnaAnng06210D	chrAnn_random:6190176-6192161	Purple	Green	OK	8.32742	22.7564	1.45033	2.45653	0.00135	0.0100731	yes
BnaAnng06240D	chrAnn_random:6198752-6200378	Purple	Green	OK	44.2317	0	#NAME?	#NAME?	5e-05	0.000600056	yes
BnaAnng06270D	chrAnn_random:6215857-6216470	Purple	Green	OK	0	243.798	inf	#NAME?	5e-05	0.000600056	yes
BnaAnng06870D	chrAnn_random:6833529-6833793	Purple	Green	OK	41.3183	0	#NAME?	#NAME?	5e-05	0.000600056	yes
BnaAnng07130D	chrAnn_random:6970681-6972135	Purple	Green	OK	15.4821	5.28628	-1.55027	-2.06019	0.00625	0.0342059	yes
BnaAnng07210D	chrAnn_random:7079069-7080647	Purple	Green	OK	2.12339	0	#NAME?	#NAME?	0.00035	0.00329203	yes
BnaAnng07320D	chrAnn_random:7193532-7195153	Purple	Green	OK	7.6949	18.8706	1.29416	2.27268	0.0027	0.0175555	yes
BnaAnng07430D	chrAnn_random:7278257-7281866	Purple	Green	OK	17.3034	8.73579	-0.986041	-1.88253	0.00845	0.0432484	yes
BnaAnng07540D	chrAnn_random:7327442-7329165	Purple	Green	OK	4.62215	0	#NAME?	#NAME?	5e-05	0.000600056	yes
BnaAnng07610D	chrAnn_random:7366241-7367031	Purple	Green	OK	30.6115	70.0954	1.19524	2.16168	0.0039	0.0234725	yes
BnaAnng08650D	chrAnn_random:9114340-9114876	Purple	Green	OK	7.49533	0	#NAME?	#NAME?	0.00035	0.00329203	yes
BnaAnng08750D	chrAnn_random:9161901-9163998	Purple	Green	OK	0	2.66059	inf	#NAME?	5e-05	0.000600056	yes
BnaAnng09030D	chrAnn_random:9567329-9568169	Purple	Green	OK	14.9399	57.0266	1.93246	2.96258	0.0004	0.0036951	yes
BnaAnng09160D	chrAnn_random:9675643-9677468	Purple	Green	OK	5.32113	0	#NAME?	#NAME?	5e-05	0.000600056	yes
BnaAnng09310D	chrAnn_random:9916246-9916834	Purple	Green	OK	55.6399	23.6211	-1.23604	-2.14385	0.0026	0.0170575	yes
BnaAnng10520D	chrAnn_random:11461480-11462785	Purple	Green	OK	9.83093	0	#NAME?	#NAME?	5e-05	0.000600056	yes
BnaAnng11140D	chrAnn_random:12181922-12182213	Purple	Green	OK	0	7.78801	inf	#NAME?	0.0001	0.0011169	yes
BnaAnng11170D	chrAnn_random:12185092-12188710	Purple	Green	OK	0.809344	4.07988	2.3337	2.98744	0.00195	0.013518	yes
BnaAnng11520D	chrAnn_random:12498977-12499553	Purple	Green	OK	2.95614	0	#NAME?	#NAME?	0.0001	0.0011169	yes
BnaAnng12330D	chrAnn_random:13352470-13355871	Purple	Green	OK	11.076	24.2717	1.13184	2.28289	0.0022	0.014881	yes
BnaAnng12450D	chrAnn_random:13431670-13432974	Purple	Green	OK	0	3.42796	inf	#NAME?	5e-05	0.000600056	yes
BnaAnng12530D	chrAnn_random:13544764-13546515	Purple	Green	OK	21.6174	67.0629	1.63332	3.24128	5e-05	0.000600056	yes
BnaAnng12640D	chrAnn_random:13599804-13601584	Purple	Green	OK	4.38311	11.0149	1.32944	1.98427	0.0092	0.0461007	yes
BnaAnng12820D	chrAnn_random:13703523-13705122	Purple	Green	OK	11.6602	29.4089	1.33466	2.26412	0.0031	0.019515	yes
BnaAnng12860D	chrAnn_random:13726636-13728029	Purple	Green	OK	6.65991	26.5773	1.99662	2.98422	0.00035	0.00329203	yes
BnaAnng12900D	chrAnn_random:13739038-13741821	Purple	Green	OK	2.58669	9.25758	1.83953	2.34944	0.0027	0.0175555	yes
BnaAnng13010D	chrAnn_random:14018545-14020058	Purple	Green	OK	1.93787	0	#NAME?	#NAME?	5e-05	0.000600056	yes
BnaAnng13020D	chrAnn_random:14020401-14020687	Purple	Green	OK	24.4355	0	#NAME?	#NAME?	5e-05	0.000600056	yes
BnaAnng13830D	chrAnn_random:14719461-14720575	Purple	Green	OK	1.3808	11.6663	3.07876	3.05866	0.003	0.0190614	yes
BnaAnng14060D	chrAnn_random:15230535-15232401	Purple	Green	OK	8.60232	19.5377	1.18346	1.96775	0.0085	0.0434419	yes
BnaAnng14750D	chrAnn_random:15787422-15789220	Purple	Green	OK	6.4737	20.6051	1.67034	2.76934	0.0005	0.00447196	yes
BnaAnng15790D	chrAnn_random:16741141-16742582	Purple	Green	OK	2.26633	0	#NAME?	#NAME?	5e-05	0.000600056	yes
BnaAnng15930D	chrAnn_random:16917597-16918377	Purple	Green	OK	5.43794	0	#NAME?	#NAME?	5e-05	0.000600056	yes
BnaAnng15940D	chrAnn_random:16918742-16921064	Purple	Green	OK	27.251	12.333	-1.14379	-2.0412	0.0057	0.0316826	yes
BnaAnng16070D	chrAnn_random:17124393-17126028	Purple	Green	OK	23.0207	2.6609	-3.11294	-4.2396	5e-05	0.000600056	yes
BnaAnng16090D	chrAnn_random:17192629-17195028	Purple	Green	OK	0	4.92956	inf	#NAME?	5e-05	0.000600056	yes
BnaAnng17270D	chrAnn_random:18381673-18384192	Purple	Green	OK	14.7427	4.93354	-1.5793	-2.39254	0.0014	0.0103858	yes
BnaAnng17710D	chrAnn_random:18715017-18715989	Purple	Green	OK	0.570907	6.44031	3.4958	3.01578	0.01	0.049149	yes
BnaAnng17770D	chrAnn_random:18739682-18740283	Purple	Green	OK	3.52224	0	#NAME?	#NAME?	5e-05	0.000600056	yes
BnaAnng17900D	chrAnn_random:18843614-18844208	Purple	Green	OK	0	11.9054	inf	#NAME?	5e-05	0.000600056	yes
BnaAnng17950D	chrAnn_random:18863207-18864503	Purple	Green	OK	18.1511	5.42735	-1.74174	-2.42874	0.00305	0.0193026	yes
BnaAnng17960D	chrAnn_random:18867356-18871014	Purple	Green	OK	0.689258	2.16096	1.64855	2.07789	0.00795	0.0412491	yes
BnaAnng18530D	chrAnn_random:19829375-19833331	Purple	Green	OK	15.2921	5.0042	-1.61158	-2.11535	0.0054	0.0303572	yes
BnaAnng18980D	chrAnn_random:20229178-20230291	Purple	Green	OK	2.02788	0	#NAME?	#NAME?	0.00055	0.00481964	yes
BnaAnng19090D	chrAnn_random:20411483-20413742	Purple	Green	OK	51.871	143.318	1.46621	2.57872	0.0005	0.00447196	yes
BnaAnng19110D	chrAnn_random:20427792-20429092	Purple	Green	OK	513.471	2545.77	2.30975	2.25489	0.0101	0.0493756	yes
BnaAnng19610D	chrAnn_random:21201293-21201752	Purple	Green	OK	24.9603	0	#NAME?	#NAME?	0.0001	0.0011169	yes
BnaAnng19630D	chrAnn_random:21220473-21224396	Purple	Green	OK	0.684332	3.30946	2.27383	2.4563	0.00525	0.0296335	yes
BnaAnng19740D	chrAnn_random:21642498-21645430	Purple	Green	OK	0	2.97031	inf	#NAME?	5e-05	0.000600056	yes
BnaAnng19920D	chrAnn_random:21757299-21758183	Purple	Green	OK	9.08309	0	#NAME?	#NAME?	5e-05	0.000600056	yes
BnaAnng20000D	chrAnn_random:21796193-21798170	Purple	Green	OK	1.18946	8.33721	2.80926	2.78879	0.0031	0.019515	yes
BnaAnng20490D	chrAnn_random:22405809-22408317	Purple	Green	OK	42.4442	19.3727	-1.13154	-2.31603	0.00155	0.0112947	yes
BnaAnng20660D	chrAnn_random:22785886-22787277	Purple	Green	OK	0.971762	6.17471	2.6677	2.48584	0.00945	0.0470299	yes
BnaAnng20880D	chrAnn_random:23043253-23044377	Purple	Green	OK	31.6564	12.0031	-1.39909	-2.3166	0.00235	0.0157264	yes
BnaAnng21270D	chrAnn_random:23589645-23591111	Purple	Green	OK	4.17406	0	#NAME?	#NAME?	5e-05	0.000600056	yes
BnaAnng21400D	chrAnn_random:23801169-23803133	Purple	Green	OK	31.8489	9.11895	-1.8043	-2.68188	0.0006	0.00517851	yes
BnaAnng21710D	chrAnn_random:24172171-24173144	Purple	Green	OK	10.2131	0	#NAME?	#NAME?	5e-05	0.000600056	yes
BnaAnng21760D	chrAnn_random:24185721-24188357	Purple	Green	OK	8.15702	1.66555	-2.29204	-3.02495	0.00025	0.0024567	yes
BnaAnng22160D	chrAnn_random:24715028-24717347	Purple	Green	OK	30.6736	7.87747	-1.96119	-3.35637	0.0001	0.0011169	yes
BnaAnng22720D	chrAnn_random:25525161-25526941	Purple	Green	OK	0	2.46305	inf	#NAME?	5e-05	0.000600056	yes
BnaAnng22920D	chrAnn_random:25733356-25734160	Purple	Green	OK	229.156	1100.17	2.26332	3.06729	0.00015	0.00159108	yes
BnaAnng22990D	chrAnn_random:25793139-25794224	Purple	Green	OK	0	33.2951	inf	#NAME?	5e-05	0.000600056	yes
BnaAnng23070D	chrAnn_random:25983022-25984665	Purple	Green	OK	21.6373	0	#NAME?	#NAME?	5e-05	0.000600056	yes
BnaAnng23080D	chrAnn_random:25984749-25985776	Purple	Green	OK	6.15817	0	#NAME?	#NAME?	0.00035	0.00329203	yes
BnaAnng23090D	chrAnn_random:25988200-25990083	Purple	Green	OK	2.07288	6.24241	1.59046	2.02831	0.00685	0.0366756	yes
BnaAnng23230D	chrAnn_random:26284387-26287881	Purple	Green	OK	5.79815	13.329	1.2009	1.98209	0.0071	0.0376805	yes
BnaAnng23660D	chrAnn_random:27148444-27150301	Purple	Green	OK	1.48256	8.96155	2.59566	2.81117	0.005	0.0285136	yes
BnaAnng23680D	chrAnn_random:27160533-27161022	Purple	Green	OK	38.7138	5.64193	-2.77859	-3.32916	0.0005	0.00447196	yes
BnaAnng23710D	chrAnn_random:27205948-27206904	Purple	Green	OK	0	3.01761	inf	#NAME?	0.00135	0.0100731	yes
BnaAnng24020D	chrAnn_random:27570993-27571887	Purple	Green	OK	7.81271	30.9697	1.98696	2.55791	0.00255	0.0168017	yes
BnaAnng24080D	chrAnn_random:27679552-27679870	Purple	Green	OK	3.42253	0	#NAME?	#NAME?	0.0044	0.0257799	yes
BnaAnng24420D	chrAnn_random:28244478-28248096	Purple	Green	OK	2.37865	0.546601	-2.12158	-2.3629	0.00615	0.0337392	yes
BnaAnng24640D	chrAnn_random:28478424-28479902	Purple	Green	OK	9.98867	0	#NAME?	#NAME?	5e-05	0.000600056	yes
BnaAnng25020D	chrAnn_random:28939676-28942182	Purple	Green	OK	6.12142	0.868023	-2.81806	-2.82873	0.0026	0.0170575	yes
BnaAnng25090D	chrAnn_random:29091328-29092882	Purple	Green	OK	23.9162	92.1993	1.94677	3.73706	5e-05	0.000600056	yes
BnaAnng25180D	chrAnn_random:29215635-29217409	Purple	Green	OK	87.6324	507.351	2.53345	4.59279	5e-05	0.000600056	yes
BnaAnng25460D	chrAnn_random:29466296-29467684	Purple	Green	OK	13.0848	53.8342	2.04064	3.55508	5e-05	0.000600056	yes
BnaAnng25650D	chrAnn_random:29696737-29698051	Purple	Green	OK	0	2.15692	inf	#NAME?	5e-05	0.000600056	yes
BnaAnng25730D	chrAnn_random:29747871-29748604	Purple	Green	OK	3.95572	0	#NAME?	#NAME?	0.00015	0.00159108	yes
BnaAnng26040D	chrAnn_random:30004473-30004904	Purple	Green	OK	87.1366	12.6328	-2.78611	-3.04421	0.00225	0.0151935	yes
BnaAnng26270D	chrAnn_random:30178841-30179309	Purple	Green	OK	104.124	33.9075	-1.61862	-2.87371	0.00025	0.0024567	yes
BnaAnng26680D	chrAnn_random:30628060-30629921	Purple	Green	OK	0	11.1022	inf	#NAME?	5e-05	0.000600056	yes
BnaAnng27100D	chrAnn_random:31034375-31035164	Purple	Green	OK	111.026	538.287	2.27748	4.37158	5e-05	0.000600056	yes
BnaAnng27200D	chrAnn_random:31132801-31133821	Purple	Green	OK	24.4187	6.54969	-1.89849	-2.98525	0.00015	0.00159108	yes
BnaAnng27440D	chrAnn_random:31367197-31369467	Purple	Green	OK	16.4081	5.98105	-1.45594	-2.52723	0.00135	0.0100731	yes
BnaAnng27610D	chrAnn_random:31530824-31531449	Purple	Green	OK	447.475	8.82626	-5.66386	-7.03832	5e-05	0.000600056	yes
BnaAnng28360D	chrAnn_random:32326095-32326510	Purple	Green	OK	0	5.75659	inf	#NAME?	5e-05	0.000600056	yes
BnaAnng28500D	chrAnn_random:32625875-32626461	Purple	Green	OK	5.25715	40.6569	2.95115	3.88193	0.003	0.0190614	yes
BnaAnng28680D	chrAnn_random:32860298-32861474	Purple	Green	OK	13.3448	49.186	1.88197	3.53579	5e-05	0.000600056	yes
BnaAnng29750D	chrAnn_random:33939431-33940193	Purple	Green	OK	0	1.89899	inf	#NAME?	5e-05	0.000600056	yes
BnaAnng29980D	chrAnn_random:34247625-34248801	Purple	Green	OK	76.1892	0	#NAME?	#NAME?	5e-05	0.000600056	yes
BnaAnng30500D	chrAnn_random:34844903-34846177	Purple	Green	OK	3.72212	0	#NAME?	#NAME?	5e-05	0.000600056	yes
BnaAnng30750D	chrAnn_random:35069536-35070406	Purple	Green	OK	8.3479	65.0649	2.9624	3.80572	0.0001	0.0011169	yes
BnaAnng31110D	chrAnn_random:35559288-35560787	Purple	Green	OK	0	3.53054	inf	#NAME?	5e-05	0.000600056	yes
BnaAnng31150D	chrAnn_random:35609412-35610664	Purple	Green	OK	4.99266	15.9683	1.67733	2.19529	0.0047	0.0271408	yes
BnaAnng31300D	chrAnn_random:35803435-35804714	Purple	Green	OK	0	14.4036	inf	#NAME?	5e-05	0.000600056	yes
BnaAnng31690D	chrAnn_random:36238513-36240370	Purple	Green	OK	4.57042	0	#NAME?	#NAME?	5e-05	0.000600056	yes
BnaAnng31720D	chrAnn_random:36252893-36254551	Purple	Green	OK	3.36718	32.4478	3.26851	4.65384	5e-05	0.000600056	yes
BnaAnng31820D	chrAnn_random:36395023-36396252	Purple	Green	OK	3.58105	12.8694	1.84549	2.30319	0.00465	0.0269345	yes
BnaAnng32340D	chrAnn_random:36947718-36949802	Purple	Green	OK	15.862	4.21837	-1.91082	-3.00375	0.0003	0.00287919	yes
BnaAnng32420D	chrAnn_random:37051842-37052247	Purple	Green	OK	0	19.7042	inf	#NAME?	5e-05	0.000600056	yes
BnaAnng32660D	chrAnn_random:37296453-37297373	Purple	Green	OK	3.50365	0	#NAME?	#NAME?	5e-05	0.000600056	yes
BnaAnng33070D	chrAnn_random:37756758-37758942	Purple	Green	OK	19.073	0.418934	-5.50867	-5.96546	0.0005	0.00447196	yes
BnaAnng33220D	chrAnn_random:37892550-37893606	Purple	Green	OK	0	7.09551	inf	#NAME?	5e-05	0.000600056	yes
BnaAnng33580D	chrAnn_random:38275434-38276526	Purple	Green	OK	1.06877	12.7533	3.57684	3.43827	0.004	0.0239529	yes
BnaAnng33770D	chrAnn_random:38520805-38522359	Purple	Green	OK	26.1387	12.951	-1.01312	-1.86355	0.00885	0.0448517	yes
BnaAnng33970D	chrAnn_random:38718179-38719709	Purple	Green	OK	57.4863	25.332	-1.18226	-2.37044	0.0011	0.00852321	yes
BnaAnng34320D	chrAnn_random:39102565-39104270	Purple	Green	OK	8.64894	0.830222	-3.38095	-3.40493	0.0012	0.00912598	yes
BnaAnng34360D	chrAnn_random:39126712-39127957	Purple	Green	OK	66.331	175.983	1.40768	2.79961	0.0001	0.0011169	yes
BnaAnng34390D	chrAnn_random:39152654-39153289	Purple	Green	OK	23.2356	0	#NAME?	#NAME?	5e-05	0.000600056	yes
BnaAnng34450D	chrAnn_random:39213074-39215456	Purple	Green	OK	2.50642	9.26668	1.88642	2.34424	0.00325	0.0202919	yes
BnaAnng34570D	chrAnn_random:39333679-39334207	Purple	Green	OK	172.136	815.839	2.24474	3.95523	5e-05	0.000600056	yes
BnaAnng34910D	chrAnn_random:39730247-39731390	Purple	Green	OK	0	1.99566	inf	#NAME?	0.00015	0.00159108	yes
BnaAnng35370D	chrAnn_random:40119656-40120798	Purple	Green	OK	57.7557	16.1357	-1.8397	-3.19777	0.00015	0.00159108	yes
BnaAnng35880D	chrAnn_random:40763322-40764434	Purple	Green	OK	32.779	12.8002	-1.35661	-2.43677	0.0012	0.00912598	yes
BnaAnng36060D	chrAnn_random:40918309-40918666	Purple	Green	OK	9.89542	0	#NAME?	#NAME?	0.0001	0.0011169	yes
BnaAnng36570D	chrAnn_random:41471660-41473252	Purple	Green	OK	19.0685	5.37493	-1.82687	-2.39346	0.00325	0.0202919	yes
BnaAnng36660D	chrAnn_random:41611704-41612984	Purple	Green	OK	2.69299	0	#NAME?	#NAME?	5e-05	0.000600056	yes
BnaAnng36670D	chrAnn_random:41613666-41613864	Purple	Green	OK	0	21.7577	inf	#NAME?	0.00025	0.0024567	yes
BnaAnng36760D	chrAnn_random:41717961-41718996	Purple	Green	OK	5.47001	0	#NAME?	#NAME?	5e-05	0.000600056	yes
BnaAnng36930D	chrAnn_random:41890217-41890615	Purple	Green	OK	18.4025	68.3644	1.89335	2.495	0.0028	0.0180555	yes
BnaAnng37060D	chrAnn_random:42020210-42021371	Purple	Green	OK	3.27231	0	#NAME?	#NAME?	0.0031	0.019515	yes
BnaAnng37080D	chrAnn_random:42025858-42027006	Purple	Green	OK	35.0003	7.65646	-2.19262	-3.18399	5e-05	0.000600056	yes
BnaAnng37550D	chrAnn_random:42548938-42551155	Purple	Green	OK	6.75385	20.5232	1.60347	2.18647	0.0046	0.0266738	yes
BnaAnng37640D	chrAnn_random:42632967-42633562	Purple	Green	OK	90.4984	293.532	1.69755	3.36795	5e-05	0.000600056	yes
BnaAnng37980D	chrAnn_random:43016538-43016993	Purple	Green	OK	216.844	3691.62	4.08952	6.35188	5e-05	0.000600056	yes
BnaAnng38150D	chrAnn_random:43203854-43204732	Purple	Green	OK	2.97403	0	#NAME?	#NAME?	0.0012	0.00912598	yes
BnaAnng38170D	chrAnn_random:43245346-43245742	Purple	Green	OK	0	39.1311	inf	#NAME?	5e-05	0.000600056	yes
BnaAnng38340D	chrAnn_random:43391789-43392347	Purple	Green	OK	273.825	59.3869	-2.20503	-4.23401	5e-05	0.000600056	yes
BnaAnng38620D	chrAnn_random:43800098-43801456	Purple	Green	OK	2.48023	0	#NAME?	#NAME?	0.0044	0.0257799	yes
BnaAnng38760D	chrAnn_random:43969853-43970897	Purple	Green	OK	2.25319	0	#NAME?	#NAME?	5e-05	0.000600056	yes
BnaAnng38960D	chrAnn_random:44321480-44322031	Purple	Green	OK	0	8.90147	inf	#NAME?	0.00025	0.0024567	yes
BnaAnng38970D	chrAnn_random:44339747-44340227	Purple	Green	OK	36.1567	1033.19	4.8367	7.02478	5e-05	0.000600056	yes
BnaAnng39060D	chrAnn_random:44401608-44403681	Purple	Green	OK	2.96326	48.8777	4.04392	6.01309	5e-05	0.000600056	yes
BnaAnng39120D	chrAnn_random:44494201-44495886	Purple	Green	OK	10.6935	0	#NAME?	#NAME?	5e-05	0.000600056	yes
BnaAnng39590D	chrAnn_random:45115652-45116893	Purple	Green	OK	44.3638	99.3163	1.16265	2.28103	0.0016	0.0115957	yes
BnaAnng40070D	chrAnn_random:45762353-45764160	Purple	Green	OK	2.9605	0	#NAME?	#NAME?	5e-05	0.000600056	yes
BnaAnng40320D	chrAnn_random:46023068-46024392	Purple	Green	OK	15.6185	67.8618	2.11934	3.31323	5e-05	0.000600056	yes
BnaAnng40350D	chrAnn_random:46069873-46070803	Purple	Green	OK	4.37982	25.2364	2.52657	3.14072	0.00025	0.0024567	yes
BnaAnng40550D	chrAnn_random:46385410-46386095	Purple	Green	OK	38.6976	147.224	1.9277	3.20446	5e-05	0.000600056	yes
BnaAnng40570D	chrAnn_random:46409971-46410563	Purple	Green	OK	14.3037	73.8211	2.36764	3.59782	5e-05	0.000600056	yes
BnaAnng40580D	chrAnn_random:46431706-46432729	Purple	Green	OK	3.8037	0	#NAME?	#NAME?	5e-05	0.000600056	yes
BnaAnng40590D	chrAnn_random:46439596-46440109	Purple	Green	OK	13.9744	0	#NAME?	#NAME?	5e-05	0.000600056	yes
BnaAnng40800D	chrAnn_random:46790128-46790545	Purple	Green	OK	0	5.66395	inf	#NAME?	5e-05	0.000600056	yes
BnaAnng40850D	chrAnn_random:46872916-46874555	Purple	Green	OK	1.71006	6.90509	2.01362	2.21414	0.0075	0.0394054	yes
BnaAnng41140D	chrAnn_random:47233285-47234321	Purple	Green	OK	0	1.78554	inf	#NAME?	5e-05	0.000600056	yes
BnaAnng41460D	chrAnn_random:47828406-47830077	Purple	Green	OK	29.4875	12.7819	-1.206	-2.07425	0.00485	0.0277867	yes
BnaAnng41520D	chrAnn_random:47955645-47957422	Purple	Green	OK	0	4.10911	inf	#NAME?	5e-05	0.000600056	yes
BnaAnng41640D	chrAnn_random:48242875-48243220	Purple	Green	OK	3.94112	0	#NAME?	#NAME?	0.0043	0.0253329	yes
BnaAnng41830D	chrAnn_random:48410803-48411975	Purple	Green	OK	2.64029	0	#NAME?	#NAME?	0.0001	0.0011169	yes
BnaAnng41970D	chrAnn_random:48574933-48575518	Purple	Green	OK	0	5.01337	inf	#NAME?	5e-05	0.000600056	yes
BnaAnng41980D	chrAnn_random:48582086-48582522	Purple	Green	OK	35.3039	112.419	1.67098	2.56519	0.0007	0.00589401	yes
BnaAnng42000D	chrAnn_random:48630572-48631922	Purple	Green	OK	807.799	34.9147	-4.53209	-3.00963	0.0039	0.0234725	yes
BnaC01g00010D	chrC01:1352-1670	Purple	Green	OK	28.4558	83.5499	1.55391	2.11259	0.00835	0.0428804	yes
BnaC01g00070D	chrC01:20705-22753	Purple	Green	OK	130.514	558.235	2.09667	3.06766	0.0002	0.00205349	yes
BnaC01g00230D	chrC01:67440-68995	Purple	Green	OK	5.50703	1.35299	-2.02512	-2.30125	0.00665	0.0359531	yes
BnaC01g00360D	chrC01:106355-106622	Purple	Green	OK	0	20.1269	inf	#NAME?	5e-05	0.000600056	yes
BnaC01g00510D	chrC01:187921-189934	Purple	Green	OK	8.84961	24.7833	1.48569	2.73349	0.00055	0.00481964	yes
BnaC01g00540D	chrC01:194585-197190	Purple	Green	OK	8.82197	37.3064	2.08025	3.82635	5e-05	0.000600056	yes
BnaC01g00580D	chrC01:210138-210667	Purple	Green	OK	4.95009	0	#NAME?	#NAME?	0.0002	0.00205349	yes
BnaC01g00600D	chrC01:218174-221195	Purple	Green	OK	15.3856	54.9518	1.83658	2.99335	0.0002	0.00205349	yes
BnaC01g00720D	chrC01:300718-302047	Purple	Green	OK	14.9278	33.8908	1.18289	2.25529	0.0028	0.0180555	yes
BnaC01g00730D	chrC01:303177-304707	Purple	Green	OK	139.065	68.9675	-1.01177	-2.05098	0.0047	0.0271408	yes
BnaC01g00790D	chrC01:317768-319574	Purple	Green	OK	161.18	2.56673	-5.97259	-7.29803	5e-05	0.000600056	yes
BnaC01g00800D	chrC01:326263-328099	Purple	Green	OK	180.726	6.88119	-4.715	-5.95329	5e-05	0.000600056	yes
BnaC01g00830D	chrC01:348938-350831	Purple	Green	OK	216.271	85.605	-1.33708	-2.26175	0.0035	0.0215341	yes
BnaC01g01090D	chrC01:476267-479152	Purple	Green	OK	29.6213	189.221	2.67537	4.74081	5e-05	0.000600056	yes
BnaC01g01100D	chrC01:479706-481569	Purple	Green	OK	13.4442	29.7577	1.14628	2.21526	0.0023	0.0154433	yes
BnaC01g01140D	chrC01:493850-496985	Purple	Green	OK	161.523	72.8484	-1.14877	-1.92463	0.0091	0.0458576	yes
BnaC01g01270D	chrC01:583554-585322	Purple	Green	OK	0.817876	3.98887	2.28603	2.29762	0.00855	0.0436626	yes
BnaC01g01290D	chrC01:597908-600339	Purple	Green	OK	10.5293	3.54962	-1.56868	-2.53376	0.0013	0.00977745	yes
BnaC01g01310D	chrC01:619375-621164	Purple	Green	OK	42.5349	14.566	-1.54605	-3.00403	5e-05	0.000600056	yes
BnaC01g01410D	chrC01:683119-685796	Purple	Green	OK	53.3397	144.22	1.43499	2.64925	0.00025	0.0024567	yes
BnaC01g01420D	chrC01:685983-687816	Purple	Green	OK	30.8637	12.9316	-1.25501	-2.38744	0.00135	0.0100731	yes
BnaC01g01580D	chrC01:777688-780592	Purple	Green	OK	1.63904	6.1097	1.89825	2.40513	0.0038	0.0229828	yes
BnaC01g01660D	chrC01:808886-809864	Purple	Green	OK	36.808	11.3881	-1.6925	-2.95648	0.00015	0.00159108	yes
BnaC01g01800D	chrC01:923864-926550	Purple	Green	OK	13.9718	28.646	1.03582	2.04021	0.0038	0.0229828	yes
BnaC01g01810D	chrC01:936283-937987	Purple	Green	OK	12.7453	37.5484	1.55879	2.8423	0.0003	0.00287919	yes
BnaC01g01890D	chrC01:968360-970199	Purple	Green	OK	13.252	33.5217	1.33888	2.43685	0.001	0.00787399	yes
BnaC01g01900D	chrC01:972517-974407	Purple	Green	OK	5.44207	20.0575	1.88192	3.19033	0.0001	0.0011169	yes
BnaC01g01960D	chrC01:990651-992083	Purple	Green	OK	30.7758	103.979	1.75643	3.38449	5e-05	0.000600056	yes
BnaC01g01970D	chrC01:993960-995666	Purple	Green	OK	23.2878	10.69	-1.12331	-2.06141	0.00615	0.0337392	yes
BnaC01g02060D	chrC01:1045724-1047781	Purple	Green	OK	2.6831	12.8244	2.25693	3.25462	0.00015	0.00159108	yes
BnaC01g02090D	chrC01:1061786-1065207	Purple	Green	OK	1.89273	0	#NAME?	#NAME?	5e-05	0.000600056	yes
BnaC01g02210D	chrC01:1148176-1150720	Purple	Green	OK	1.59537	5.60138	1.81189	2.52947	0.00155	0.0112947	yes
BnaC01g02220D	chrC01:1153163-1154663	Purple	Green	OK	36.8138	76.1834	1.04923	2.10434	0.0031	0.019515	yes
BnaC01g02250D	chrC01:1167227-1167599	Purple	Green	OK	2.86144	0	#NAME?	#NAME?	0.00575	0.0318666	yes
BnaC01g02320D	chrC01:1192300-1195581	Purple	Green	OK	18.485	42.3184	1.19493	2.41375	0.0009	0.00726139	yes
BnaC01g02400D	chrC01:1262141-1264566	Purple	Green	OK	117.452	50.7354	-1.21101	-2.17159	0.0022	0.014881	yes
BnaC01g02430D	chrC01:1277254-1281037	Purple	Green	OK	23.9154	3.50915	-2.76874	-5.01393	5e-05	0.000600056	yes
BnaC01g02480D	chrC01:1310175-1311656	Purple	Green	OK	12.222	39.4364	1.69005	3.05268	5e-05	0.000600056	yes
BnaC01g02610D	chrC01:1378284-1379750	Purple	Green	OK	66.7199	20.079	-1.73243	-3.2401	5e-05	0.000600056	yes
BnaC01g02870D	chrC01:1511473-1523983	Purple	Green	OK	7.94633	2.93591	-1.43648	-2.84218	0.00025	0.0024567	yes
BnaC01g03120D	chrC01:1615506-1617180	Purple	Green	OK	83.2672	173.977	1.06307	2.06088	0.005	0.0285136	yes
BnaC01g03220D	chrC01:1652842-1655271	Purple	Green	OK	9.03779	1.38228	-2.70892	-2.93426	0.00295	0.0188296	yes
BnaC01g03280D	chrC01:1695570-1699564	Purple	Green	OK	2.64328	7.64367	1.53194	2.61195	0.0005	0.00447196	yes
BnaC01g03340D	chrC01:1726044-1727296	Purple	Green	OK	103.444	17.0826	-2.59824	-4.71846	5e-05	0.000600056	yes
BnaC01g03430D	chrC01:1772941-1774459	Purple	Green	OK	73.4391	0	#NAME?	#NAME?	5e-05	0.000600056	yes
BnaC01g03440D	chrC01:1779252-1779942	Purple	Green	OK	1.72914	0	#NAME?	#NAME?	0.00015	0.00159108	yes
BnaC01g03470D	chrC01:1804524-1806356	Purple	Green	OK	0	5.90646	inf	#NAME?	5e-05	0.000600056	yes
BnaC01g03630D	chrC01:1874313-1880079	Purple	Green	OK	24.6657	92.1241	1.90108	3.35936	5e-05	0.000600056	yes
BnaC01g03690D	chrC01:1907625-1910705	Purple	Green	OK	17.9068	33.9602	0.923334	1.86652	0.0083	0.0426851	yes
BnaC01g03720D	chrC01:1941527-1944085	Purple	Green	OK	5.47274	16.5902	1.59999	2.83916	0.0003	0.00287919	yes
BnaC01g03770D	chrC01:1957233-1959993	Purple	Green	OK	87.2957	31.9232	-1.45131	-2.42127	0.00155	0.0112947	yes
BnaC01g03800D	chrC01:1966896-1967723	Purple	Green	OK	265.934	664.317	1.3208	2.6318	0.00015	0.00159108	yes
BnaC01g03810D	chrC01:1977631-1978096	Purple	Green	OK	84.27	19.0262	-2.14703	-3.51836	5e-05	0.000600056	yes
BnaC01g03860D	chrC01:2012671-2014125	Purple	Green	OK	1.6292	12.4163	2.92999	3.54335	0.00145	0.0107096	yes
BnaC01g04050D	chrC01:2111692-2113506	Purple	Green	OK	35.6863	17.5093	-1.02725	-1.85006	0.01005	0.0493494	yes
BnaC01g04060D	chrC01:2114661-2116947	Purple	Green	OK	19.1942	2.2594	-3.08666	-4.45528	5e-05	0.000600056	yes
BnaC01g04080D	chrC01:2122226-2123327	Purple	Green	OK	74.709	33.4273	-1.16025	-2.21463	0.00165	0.0118456	yes
BnaC01g04130D	chrC01:2149811-2151206	Purple	Green	OK	19.9088	3.07839	-2.69316	-3.95008	5e-05	0.000600056	yes
BnaC01g04190D	chrC01:2187275-2191407	Purple	Green	OK	98.8205	16.5001	-2.58234	-4.52583	5e-05	0.000600056	yes
BnaC01g04200D	chrC01:2191500-2192264	Purple	Green	OK	129.542	340.855	1.39574	2.78275	0.0001	0.0011169	yes
BnaC01g04310D	chrC01:2260693-2262688	Purple	Green	OK	15.6339	39.2433	1.32777	2.58728	0.00075	0.00624773	yes
BnaC01g04330D	chrC01:2267406-2269297	Purple	Green	OK	10.308	3.50299	-1.5571	-2.17362	0.0061	0.0335223	yes
BnaC01g04410D	chrC01:2301338-2301944	Purple	Green	OK	1057.65	2512.96	1.24852	2.43199	0.0009	0.00726139	yes
BnaC01g04490D	chrC01:2381704-2385101	Purple	Green	OK	6.73649	15.39	1.19192	2.20939	0.00185	0.0130048	yes
BnaC01g04550D	chrC01:2407908-2409171	Purple	Green	OK	10.2771	3.03892	-1.7578	-2.17229	0.0059	0.032574	yes
BnaC01g04560D	chrC01:2410053-2413118	Purple	Green	OK	5.36443	1.52475	-1.81485	-2.07239	0.00645	0.0350967	yes
BnaC01g04570D	chrC01:2413609-2413861	Purple	Green	OK	0	25.7264	inf	#NAME?	5e-05	0.000600056	yes
BnaC01g04590D	chrC01:2416543-2421559	Purple	Green	OK	28.1506	11.7779	-1.25708	-2.52351	0.00045	0.00408286	yes
BnaC01g04640D	chrC01:2439414-2441132	Purple	Green	OK	14.6539	35.6803	1.28385	2.31182	0.00185	0.0130048	yes
BnaC01g04650D	chrC01:2443689-2446391	Purple	Green	OK	25.4835	57.1362	1.16484	2.23352	0.0026	0.0170575	yes
BnaC01g04720D	chrC01:2471779-2474108	Purple	Green	OK	34.9957	106.193	1.60144	3.19821	5e-05	0.000600056	yes
BnaC01g04810D	chrC01:2500691-2503056	Purple	Green	OK	35.1565	10.7174	-1.71384	-3.38201	5e-05	0.000600056	yes
BnaC01g04930D	chrC01:2534603-2537865	Purple	Green	OK	43.0057	19.3515	-1.15208	-2.27118	0.00165	0.0118456	yes
BnaC01g05240D	chrC01:2675588-2677198	Purple	Green	OK	4.58101	12.903	1.49397	1.95909	0.0092	0.0461007	yes
BnaC01g05260D	chrC01:2691345-2692991	Purple	Green	OK	8.59062	1.3719	-2.64659	-3.17628	0.00095	0.00758084	yes
BnaC01g05300D	chrC01:2730784-2733149	Purple	Green	OK	6.49342	21.2967	1.71358	2.99249	0.0001	0.0011169	yes
BnaC01g05340D	chrC01:2750934-2752726	Purple	Green	OK	24.8957	52.8416	1.08577	1.92251	0.0076	0.0398069	yes
BnaC01g05610D	chrC01:2987533-2988287	Purple	Green	OK	0	88.127	inf	#NAME?	0.0031	0.019515	yes
BnaC01g05750D	chrC01:3067622-3067958	Purple	Green	OK	6.2008	0	#NAME?	#NAME?	0.00025	0.0024567	yes
BnaC01g05890D	chrC01:3122624-3124236	Purple	Green	OK	19.1499	90.0308	2.23308	3.72983	5e-05	0.000600056	yes
BnaC01g06160D	chrC01:3240356-3241757	Purple	Green	OK	22.7162	113.981	2.327	4.34538	5e-05	0.000600056	yes
BnaC01g06240D	chrC01:3291485-3292524	Purple	Green	OK	19.2523	46.0711	1.25883	2.01071	0.0092	0.0461007	yes
BnaC01g06270D	chrC01:3308822-3309544	Purple	Green	OK	134.094	789.618	2.55791	4.3742	5e-05	0.000600056	yes
BnaC01g06380D	chrC01:3339273-3341528	Purple	Green	OK	2.83224	13.6994	2.27409	3.7268	0.00015	0.00159108	yes
BnaC01g06460D	chrC01:3370230-3373527	Purple	Green	OK	64.8144	158.217	1.28752	2.38623	0.00145	0.0107096	yes
BnaC01g06470D	chrC01:3374001-3378748	Purple	Green	OK	20.9446	69.3709	1.72775	3.23166	5e-05	0.000600056	yes
BnaC01g06540D	chrC01:3424196-3426115	Purple	Green	OK	28.2775	5.70963	-2.30818	-3.88477	5e-05	0.000600056	yes
BnaC01g06570D	chrC01:3444257-3445825	Purple	Green	OK	4.77904	0	#NAME?	#NAME?	5e-05	0.000600056	yes
BnaC01g06580D	chrC01:3446086-3449236	Purple	Green	OK	4.30443	18.3907	2.09508	3.71127	5e-05	0.000600056	yes
BnaC01g06600D	chrC01:3450083-3450785	Purple	Green	OK	139.598	57.3616	-1.28313	-2.54649	0.00055	0.00481964	yes
BnaC01g06630D	chrC01:3475202-3478544	Purple	Green	OK	8.34219	3.50124	-1.25256	-1.99638	0.008	0.0414415	yes
BnaC01g06890D	chrC01:3614044-3614644	Purple	Green	OK	30.8225	100.341	1.70286	2.83241	0.00025	0.0024567	yes
BnaC01g07110D	chrC01:3688992-3692398	Purple	Green	OK	3.52379	9.68908	1.45923	2.39443	0.00185	0.0130048	yes
BnaC01g07140D	chrC01:3712002-3713357	Purple	Green	OK	79.6935	38.1305	-1.06352	-2.08725	0.0044	0.0257799	yes
BnaC01g07280D	chrC01:3776660-3777979	Purple	Green	OK	4.77307	18.6711	1.96782	3.17451	5e-05	0.000600056	yes
BnaC01g07350D	chrC01:3838288-3840197	Purple	Green	OK	15.1158	30.5256	1.01396	1.99626	0.0055	0.0308006	yes
BnaC01g07470D	chrC01:3927537-3929638	Purple	Green	OK	23.4356	55.4403	1.24223	2.49007	0.00065	0.00553406	yes
BnaC01g07500D	chrC01:3934228-3936751	Purple	Green	OK	47.7283	110.401	1.20984	2.29734	0.00195	0.013518	yes
BnaC01g07540D	chrC01:3948791-3950523	Purple	Green	OK	10.4916	2.18042	-2.26656	-2.71126	0.00205	0.0140984	yes
BnaC01g07710D	chrC01:4012243-4012547	Purple	Green	OK	1893.94	3957.52	1.06321	1.87307	0.0102	0.0497203	yes
BnaC01g07800D	chrC01:4037802-4040220	Purple	Green	OK	40.7784	20.5842	-0.986268	-1.97198	0.005	0.0285136	yes
BnaC01g07810D	chrC01:4042651-4043824	Purple	Green	OK	123.516	31.503	-1.97114	-3.66894	5e-05	0.000600056	yes
BnaC01g08110D	chrC01:4292693-4293740	Purple	Green	OK	1.34769	8.33783	2.62919	2.61995	0.0035	0.0215341	yes
BnaC01g08330D	chrC01:4543419-4545822	Purple	Green	OK	8.43368	2.57024	-1.71426	-2.54522	0.0011	0.00852321	yes
BnaC01g08820D	chrC01:5006933-5008283	Purple	Green	OK	1675.61	209.392	-3.00041	-1.94566	0.01015	0.0495444	yes
BnaC01g08830D	chrC01:5011637-5013017	Purple	Green	OK	3.32132	0	#NAME?	#NAME?	5e-05	0.000600056	yes
BnaC01g09090D	chrC01:5165493-5166997	Purple	Green	OK	25.6606	58.1137	1.17932	2.38633	0.00115	0.00882952	yes
BnaC01g09340D	chrC01:5465520-5468027	Purple	Green	OK	3.08204	0	#NAME?	#NAME?	5e-05	0.000600056	yes
BnaC01g09530D	chrC01:5570907-5572302	Purple	Green	OK	26.3957	10.5667	-1.32078	-2.02668	0.0072	0.0381166	yes
BnaC01g09540D	chrC01:5573391-5579124	Purple	Green	OK	97.1148	27.4097	-1.825	-2.93278	0.0002	0.00205349	yes
BnaC01g09570D	chrC01:5602706-5604023	Purple	Green	OK	46.5595	22.9302	-1.02183	-2.05359	0.0039	0.0234725	yes
BnaC01g09700D	chrC01:5683915-5686252	Purple	Green	OK	9.19753	92.3138	3.32723	5.56296	5e-05	0.000600056	yes
BnaC01g09730D	chrC01:5715073-5715905	Purple	Green	OK	210.599	1176.81	2.48231	4.36738	5e-05	0.000600056	yes
BnaC01g09740D	chrC01:5716300-5717582	Purple	Green	OK	88.4109	213.373	1.27108	2.5724	0.00075	0.00624773	yes
BnaC01g09790D	chrC01:5772395-5776574	Purple	Green	OK	134.175	50.8403	-1.40007	-2.63892	0.0004	0.0036951	yes
BnaC01g09810D	chrC01:5790930-5791803	Purple	Green	OK	113.322	386.759	1.77101	3.43673	5e-05	0.000600056	yes
BnaC01g10070D	chrC01:5917896-5919366	Purple	Green	OK	22.679	9.00727	-1.33219	-2.19885	0.00375	0.0227491	yes
BnaC01g10110D	chrC01:5948807-5950250	Purple	Green	OK	15.8694	44.0884	1.47415	2.50678	0.0009	0.00726139	yes
BnaC01g10190D	chrC01:5976334-5979328	Purple	Green	OK	17.2099	6.89151	-1.32034	-2.52389	0.0006	0.00517851	yes
BnaC01g10330D	chrC01:6113572-6115792	Purple	Green	OK	0	5.06651	inf	#NAME?	5e-05	0.000600056	yes
BnaC01g10370D	chrC01:6127970-6129585	Purple	Green	OK	8.66462	20.3737	1.2335	2.14975	0.0028	0.0180555	yes
BnaC01g10420D	chrC01:6191852-6193613	Purple	Green	OK	24.6776	10.6397	-1.21375	-2.2142	0.0022	0.014881	yes
BnaC01g10720D	chrC01:6478356-6479699	Purple	Green	OK	6.86381	0	#NAME?	#NAME?	5e-05	0.000600056	yes
BnaC01g10790D	chrC01:6606650-6608123	Purple	Green	OK	8.86353	73.0587	3.0431	5.27344	5e-05	0.000600056	yes
BnaC01g10870D	chrC01:6729118-6730583	Purple	Green	OK	134.88	533.751	1.98449	2.91253	0.00065	0.00553406	yes
BnaC01g10970D	chrC01:6781853-6784627	Purple	Green	OK	40.1291	20.5339	-0.966639	-1.9499	0.00665	0.0359531	yes
BnaC01g11030D	chrC01:6877408-6878946	Purple	Green	OK	6.60223	2.14752	-1.62028	-2.19558	0.0041	0.024424	yes
BnaC01g11140D	chrC01:6928622-6930098	Purple	Green	OK	21.9573	7.71721	-1.50855	-2.64316	0.00055	0.00481964	yes
BnaC01g11150D	chrC01:6943989-6946318	Purple	Green	OK	77.8306	35.0326	-1.15164	-2.29986	0.0016	0.0115957	yes
BnaC01g11170D	chrC01:6948775-6949696	Purple	Green	OK	2.16697	23.565	3.44289	4.03138	0.00015	0.00159108	yes
BnaC01g11430D	chrC01:7079580-7079941	Purple	Green	OK	0	8.63773	inf	#NAME?	0.00025	0.0024567	yes
BnaC01g12060D	chrC01:7615274-7618999	Purple	Green	OK	19.5577	42.718	1.12711	2.28394	0.00175	0.0124272	yes
BnaC01g12080D	chrC01:7624625-7626041	Purple	Green	OK	188.482	498.231	1.40239	2.33431	0.0023	0.0154433	yes
BnaC01g12090D	chrC01:7626893-7628878	Purple	Green	OK	0	9.97118	inf	#NAME?	5e-05	0.000600056	yes
BnaC01g12140D	chrC01:7644036-7644432	Purple	Green	OK	0	2.24927	inf	#NAME?	0.0052	0.0294654	yes
BnaC01g12180D	chrC01:7660953-7662843	Purple	Green	OK	8.63933	3.13643	-1.46179	-2.01493	0.0084	0.0430406	yes
BnaC01g12260D	chrC01:7703978-7705583	Purple	Green	OK	20.5172	1.87293	-3.45347	-4.61937	5e-05	0.000600056	yes
BnaC01g12340D	chrC01:7802573-7811589	Purple	Green	OK	16.1323	35.3907	1.13341	2.20097	0.00285	0.0183337	yes
BnaC01g12570D	chrC01:8033024-8034731	Purple	Green	OK	13.0206	31.4117	1.2705	2.29463	0.00135	0.0100731	yes
BnaC01g12600D	chrC01:8040262-8041542	Purple	Green	OK	18.0964	49.3411	1.44709	2.82446	0.00015	0.00159108	yes
BnaC01g12620D	chrC01:8068110-8069687	Purple	Green	OK	7.27374	18.5465	1.35038	2.27201	0.0028	0.0180555	yes
BnaC01g12690D	chrC01:8102244-8103113	Purple	Green	OK	137.837	533.722	1.95312	3.35078	5e-05	0.000600056	yes
BnaC01g12740D	chrC01:8164913-8165750	Purple	Green	OK	20.6036	101.035	2.29389	3.85582	5e-05	0.000600056	yes
BnaC01g12760D	chrC01:8169459-8171312	Purple	Green	OK	25.557	54.3116	1.08755	2.16111	0.00295	0.0188296	yes
BnaC01g12860D	chrC01:8220094-8221233	Purple	Green	OK	404.706	132.238	-1.61374	-2.75344	0.00085	0.00692421	yes
BnaC01g12960D	chrC01:8296778-8297734	Purple	Green	OK	0	26.0574	inf	#NAME?	5e-05	0.000600056	yes
BnaC01g13110D	chrC01:8444189-8446490	Purple	Green	OK	22.8599	48.1483	1.07467	2.16597	0.0021	0.0143469	yes
BnaC01g13180D	chrC01:8569419-8573894	Purple	Green	OK	8.68339	4.16228	-1.06088	-1.9096	0.0094	0.0468393	yes
BnaC01g13420D	chrC01:8728522-8730111	Purple	Green	OK	167.16	9.51031	-4.13559	-5.90435	5e-05	0.000600056	yes
BnaC01g13540D	chrC01:8827371-8831600	Purple	Green	OK	8.77928	0.824702	-3.41216	-3.44321	0.0009	0.00726139	yes
BnaC01g13580D	chrC01:8887429-8891199	Purple	Green	OK	19.6696	6.94857	-1.50118	-2.78044	0.0001	0.0011169	yes
BnaC01g13710D	chrC01:8944779-8950137	Purple	Green	OK	30.84	13.9285	-1.14676	-2.25796	0.00125	0.00945687	yes
BnaC01g13740D	chrC01:8973905-8974707	Purple	Green	OK	185.452	374.771	1.01496	2.03148	0.00455	0.0264653	yes
BnaC01g13770D	chrC01:8982466-8984410	Purple	Green	OK	17.3637	80.3209	2.2097	4.08828	5e-05	0.000600056	yes
BnaC01g14090D	chrC01:9284681-9286256	Purple	Green	OK	4.82191	23.7973	2.30312	3.87957	5e-05	0.000600056	yes
BnaC01g14310D	chrC01:9585793-9587161	Purple	Green	OK	473.335	15.4851	-4.93391	-6.56972	5e-05	0.000600056	yes
BnaC01g14340D	chrC01:9602701-9604332	Purple	Green	OK	109.407	347.515	1.66737	2.98102	5e-05	0.000600056	yes
BnaC01g14470D	chrC01:9700822-9711010	Purple	Green	OK	3.59929	1.61835	-1.15319	-2.0546	0.0046	0.0266738	yes
BnaC01g14610D	chrC01:9887364-9890129	Purple	Green	OK	23.3336	10.9749	-1.08819	-2.13571	0.0026	0.0170575	yes
BnaC01g14630D	chrC01:9914498-9917918	Purple	Green	OK	0.499634	2.661	2.41302	2.4211	0.01015	0.0495444	yes
BnaC01g14940D	chrC01:10114730-10116669	Purple	Green	OK	0	2.06335	inf	#NAME?	5e-05	0.000600056	yes
BnaC01g14990D	chrC01:10155221-10157471	Purple	Green	OK	57.7225	127.552	1.14388	2.28426	0.0014	0.0103858	yes
BnaC01g15000D	chrC01:10164716-10167536	Purple	Green	OK	5.92415	2.22217	-1.41464	-2.28955	0.0033	0.0205242	yes
BnaC01g15250D	chrC01:10415850-10416456	Purple	Green	OK	0	6.39025	inf	#NAME?	5e-05	0.000600056	yes
BnaC01g15480D	chrC01:10579598-10580766	Purple	Green	OK	19.9664	128.63	2.68758	4.53631	5e-05	0.000600056	yes
BnaC01g15490D	chrC01:10597373-10598427	Purple	Green	OK	51.2415	6.66741	-2.94211	-2.91506	0.0027	0.0175555	yes
BnaC01g15660D	chrC01:10748780-10751697	Purple	Green	OK	6.56045	37.4121	2.51164	4.33166	5e-05	0.000600056	yes
BnaC01g15680D	chrC01:10767102-10768879	Purple	Green	OK	51.081	24.0857	-1.08461	-2.17383	0.00215	0.0146199	yes
BnaC01g15700D	chrC01:10783356-10783881	Purple	Green	OK	5.40451	17.2305	1.67273	2.09456	0.0078	0.0406221	yes
BnaC01g15720D	chrC01:10787535-10788264	Purple	Green	OK	42.2776	190.354	2.17072	4.22607	5e-05	0.000600056	yes
BnaC01g15760D	chrC01:10800974-10803406	Purple	Green	OK	2.03404	10.8155	2.41068	2.97255	0.0009	0.00726139	yes
BnaC01g15910D	chrC01:10974677-10976295	Purple	Green	OK	18.9439	64.5322	1.76828	3.3573	5e-05	0.000600056	yes
BnaC01g15930D	chrC01:10982023-10982779	Purple	Green	OK	2.90481	0	#NAME?	#NAME?	5e-05	0.000600056	yes
BnaC01g15960D	chrC01:11020167-11020726	Purple	Green	OK	9.93284	45.0475	2.18117	3.02169	0.00015	0.00159108	yes
BnaC01g16030D	chrC01:11071482-11073023	Purple	Green	OK	15.39	39.1585	1.34733	2.47415	0.00105	0.00819322	yes
BnaC01g16150D	chrC01:11124043-11126693	Purple	Green	OK	10.709	3.00942	-1.83126	-2.85532	0.00015	0.00159108	yes
BnaC01g16200D	chrC01:11153983-11156895	Purple	Green	OK	53.9742	117.466	1.1219	2.0251	0.00575	0.0318666	yes
BnaC01g16290D	chrC01:11204185-11207235	Purple	Green	OK	7.07708	32.8808	2.21602	3.65342	5e-05	0.000600056	yes
BnaC01g16510D	chrC01:11328476-11329148	Purple	Green	OK	14.482	3.97028	-1.86695	-2.25851	0.00675	0.0362796	yes
BnaC01g16540D	chrC01:11341141-11346633	Purple	Green	OK	19.8866	7.83283	-1.34419	-2.71524	0.0001	0.0011169	yes
BnaC01g16600D	chrC01:11365836-11371709	Purple	Green	OK	48.6512	107.25	1.14043	2.10151	0.0034	0.0210237	yes
BnaC01g16640D	chrC01:11407391-11411705	Purple	Green	OK	5.62617	0.768242	-2.87252	-4.00966	5e-05	0.000600056	yes
BnaC01g16770D	chrC01:11464900-11465876	Purple	Green	OK	11.0415	38.072	1.78579	2.94325	0.0002	0.00205349	yes
BnaC01g16790D	chrC01:11475736-11478306	Purple	Green	OK	30.7718	0	#NAME?	#NAME?	5e-05	0.000600056	yes
BnaC01g16810D	chrC01:11479062-11479890	Purple	Green	OK	242.364	77.5016	-1.64488	-3.19634	5e-05	0.000600056	yes
BnaC01g16890D	chrC01:11560036-11562073	Purple	Green	OK	33.6166	14.9458	-1.16944	-2.26337	0.00205	0.0140984	yes
BnaC01g16980D	chrC01:11639706-11640425	Purple	Green	OK	158.23	777.856	2.29748	4.31453	5e-05	0.000600056	yes
BnaC01g17000D	chrC01:11645296-11646325	Purple	Green	OK	34.2767	177.855	2.3754	4.56968	5e-05	0.000600056	yes
BnaC01g17030D	chrC01:11670415-11673994	Purple	Green	OK	1.3168	9.86142	2.90476	3.40904	0.00075	0.00624773	yes
BnaC01g17040D	chrC01:11674669-11675807	Purple	Green	OK	62.7351	204.223	1.7028	3.33153	5e-05	0.000600056	yes
[truncated: 4,583 more rows]

## Sheet: B. napus(P&G)
Gene_id	Locus	Sample_1	Sample_2	Status	Value_1	Value_2	Log2(fold_change)	Test_stat	P_value	Q_value	Significant
BnaA01g00120D	chrA01:38067-39457	Purple	Green	OK	3.68889	17.5814	2.2528	3.08065	0.0002	0.00316579	yes
BnaA01g00190D	chrA01:66871-69292	Purple	Green	OK	12.776	31.6155	1.30719	2.16225	0.00255	0.0239183	yes
BnaA01g00280D	chrA01:142201-144479	Purple	Green	OK	13.1413	38.9195	1.56638	2.64605	0.0004	0.0055115	yes
BnaA01g00320D	chrA01:172928-174582	Purple	Green	OK	3.07307	25.1108	3.03056	4.25071	5e-05	0.000959923	yes
BnaA01g00420D	chrA01:233458-236551	Purple	Green	OK	23.6353	84.1868	1.83265	3.01163	0.00015	0.00250346	yes
BnaA01g00450D	chrA01:251309-251987	Purple	Green	OK	22.466	67.2332	1.58143	2.57282	0.002	0.0198091	yes
BnaA01g00460D	chrA01:254251-257623	Purple	Green	OK	37.4834	4.28576	-3.12863	-4.86388	5e-05	0.000959923	yes
BnaA01g00650D	chrA01:353139-355627	Purple	Green	OK	12.213	32.0754	1.39305	2.3572	0.00185	0.0186879	yes
BnaA01g00680D	chrA01:376992-379368	Purple	Green	OK	0.672128	4.63389	2.78542	3.18899	0.0014	0.0150511	yes
BnaA01g01040D	chrA01:568415-569731	Purple	Green	OK	44.6005	15.396	-1.5345	-2.43807	0.00065	0.00821581	yes
BnaA01g01070D	chrA01:575072-578111	Purple	Green	OK	0.473181	3.75788	2.98945	2.76796	0.00665	0.0480329	yes
BnaA01g01400D	chrA01:744115-746085	Purple	Green	OK	12.4472	49.4857	1.99119	3.35123	5e-05	0.000959923	yes
BnaA01g01420D	chrA01:754770-757115	Purple	Green	OK	3.93281	13.6967	1.80019	2.69186	0.00075	0.00921228	yes
BnaA01g01430D	chrA01:757468-761343	Purple	Green	OK	1.56396	4.59417	1.5546	2.29139	0.00355	0.0305691	yes
BnaA01g01570D	chrA01:843648-845132	Purple	Green	OK	1.21577	21.7803	4.16308	4.00061	0.00275	0.0252719	yes
BnaA01g02050D	chrA01:1025876-1028069	Purple	Green	OK	18.6056	42.5625	1.19384	1.99869	0.0059	0.0442101	yes
BnaA01g02080D	chrA01:1033365-1033791	Purple	Green	OK	12.9444	53.624	2.05055	2.78816	0.0008	0.0096705	yes
BnaA01g02170D	chrA01:1069804-1072294	Purple	Green	OK	4.07122	15.3024	1.91023	2.75724	0.00035	0.00494884	yes
BnaA01g02240D	chrA01:1150656-1151733	Purple	Green	OK	9.71174	2.80098	-1.7938	-2.23285	0.00535	0.0412406	yes
BnaA01g02270D	chrA01:1164245-1166547	Purple	Green	OK	12.6002	29.9157	1.24746	2.05922	0.0045	0.0367539	yes
BnaA01g02440D	chrA01:1234297-1237478	Purple	Green	OK	12.1631	45.2365	1.89498	3.22828	5e-05	0.000959923	yes
BnaA01g02540D	chrA01:1272190-1273160	Purple	Green	OK	58.0327	195.773	1.75424	2.94515	0.0002	0.00316579	yes
BnaA01g02620D	chrA01:1307295-1308748	Purple	Green	OK	22.2114	1.68525	-3.72027	-4.59092	5e-05	0.000959923	yes
BnaA01g02650D	chrA01:1320296-1323329	Purple	Green	OK	22.6075	6.59227	-1.77795	-2.90303	0.00025	0.00378451	yes
BnaA01g02830D	chrA01:1391621-1392684	Purple	Green	OK	8.7646	26.3889	1.59017	2.30286	0.0025	0.0235998	yes
BnaA01g02860D	chrA01:1399208-1403213	Purple	Green	OK	2.80254	8.00473	1.51412	2.39039	0.0016	0.016684	yes
BnaA01g02880D	chrA01:1410865-1413738	Purple	Green	OK	5.5641	26.565	2.2553	3.70685	5e-05	0.000959923	yes
BnaA01g02910D	chrA01:1425013-1427397	Purple	Green	OK	4.90219	17.3936	1.82706	3.03957	0.0001	0.00178191	yes
BnaA01g02930D	chrA01:1431693-1434256	Purple	Green	OK	2.83602	9.09863	1.68178	2.3689	0.0015	0.0159334	yes
BnaA01g03040D	chrA01:1467744-1469323	Purple	Green	OK	4.04377	16.4312	2.02266	2.43156	0.0034	0.0295699	yes
BnaA01g03060D	chrA01:1474801-1478945	Purple	Green	OK	3.95223	18.1129	2.19628	3.68469	5e-05	0.000959923	yes
BnaA01g03200D	chrA01:1539845-1547275	Purple	Green	OK	57.2758	172.299	1.58892	2.40035	0.00155	0.0163505	yes
BnaA01g03440D	chrA01:1626976-1628147	Purple	Green	OK	17.9552	55.6018	1.63073	2.68005	0.00045	0.00606143	yes
BnaA01g03540D	chrA01:1658183-1660424	Purple	Green	OK	1.64386	6.35454	1.9507	2.60253	0.0009	0.0105621	yes
BnaA01g03590D	chrA01:1680365-1682304	Purple	Green	OK	2.92858	17.7645	2.60073	3.44513	0.0001	0.00178191	yes
BnaA01g03790D	chrA01:1755667-1759939	Purple	Green	OK	15.2647	35.5506	1.21968	2.04339	0.00475	0.0379955	yes
BnaA01g03800D	chrA01:1760625-1764919	Purple	Green	OK	10.8187	23.7996	1.13741	1.99777	0.00555	0.0422857	yes
BnaA01g03890D	chrA01:1798244-1799923	Purple	Green	OK	1.24535	8.00377	2.68413	3.1896	0.001	0.0115482	yes
BnaA01g04100D	chrA01:1880930-1884976	Purple	Green	OK	3.96353	11.626	1.55249	2.49993	0.00095	0.0110606	yes
BnaA01g04210D	chrA01:1952524-1953253	Purple	Green	OK	0	2.26812	inf	#NAME?	0.0048	0.0382235	yes
BnaA01g04360D	chrA01:2014765-2022317	Purple	Green	OK	4.11436	15.8492	1.94567	3.17801	5e-05	0.000959923	yes
BnaA01g04730D	chrA01:2209216-2211271	Purple	Green	OK	8.63266	3.23004	-1.41825	-2.15598	0.00415	0.0346516	yes
BnaA01g05070D	chrA01:2377338-2378576	Purple	Green	OK	6.13414	24.2759	1.98459	2.9171	0.00025	0.00378451	yes
BnaA01g05130D	chrA01:2403067-2404482	Purple	Green	OK	31.1481	98.1357	1.65563	2.72562	0.00055	0.00713795	yes
BnaA01g05240D	chrA01:2447817-2451424	Purple	Green	OK	5.22812	20.0999	1.94282	3.31945	5e-05	0.000959923	yes
BnaA01g05290D	chrA01:2489819-2491268	Purple	Green	OK	2.16071	0	#NAME?	#NAME?	0.0001	0.00178191	yes
BnaA01g05410D	chrA01:2522356-2523157	Purple	Green	OK	96.3166	474.894	2.30175	3.87748	5e-05	0.000959923	yes
BnaA01g05690D	chrA01:2645435-2647465	Purple	Green	OK	8.89814	22.976	1.36855	2.24633	0.0018	0.0182563	yes
BnaA01g05820D	chrA01:2711259-2712862	Purple	Green	OK	13.0001	4.43642	-1.55106	-2.4147	0.0025	0.0235998	yes
BnaA01g05840D	chrA01:2715649-2718988	Purple	Green	OK	4.71302	27.7784	2.55924	3.99951	5e-05	0.000959923	yes
BnaA01g05900D	chrA01:2738237-2740228	Purple	Green	OK	0.61824	11.5646	4.2254	3.54819	0.0066	0.047785	yes
BnaA01g05980D	chrA01:2773299-2774764	Purple	Green	OK	7.93164	1.58022	-2.3275	-2.74074	0.0021	0.0205893	yes
BnaA01g05990D	chrA01:2774987-2781442	Purple	Green	OK	4.3478	13.521	1.63685	2.67424	0.0003	0.0043708	yes
BnaA01g06030D	chrA01:2791001-2792983	Purple	Green	OK	3.0904	11.436	1.88773	2.74714	0.00055	0.00713795	yes
BnaA01g06190D	chrA01:2881982-2884072	Purple	Green	OK	35.6381	140.261	1.97663	3.27187	5e-05	0.000959923	yes
BnaA01g06210D	chrA01:2886811-2888156	Purple	Green	OK	9.0793	27.0439	1.57465	2.35294	0.0016	0.016684	yes
BnaA01g06220D	chrA01:2888815-2891435	Purple	Green	OK	22.0352	83.1905	1.91661	3.16665	5e-05	0.000959923	yes
BnaA01g06330D	chrA01:2916788-2919379	Purple	Green	OK	26.651	60.4727	1.18209	2.02745	0.00535	0.0412406	yes
BnaA01g06350D	chrA01:2927650-2929819	Purple	Green	OK	8.896	2.42287	-1.87644	-2.71779	0.00085	0.0101314	yes
BnaA01g06440D	chrA01:2981044-2982370	Purple	Green	OK	0	102.317	inf	#NAME?	5e-05	0.000959923	yes
BnaA01g06700D	chrA01:3112539-3115183	Purple	Green	OK	6.95884	27.3412	1.97416	3.24478	5e-05	0.000959923	yes
BnaA01g06800D	chrA01:3149188-3152797	Purple	Green	OK	0.745315	15.2504	4.35486	5.18798	5e-05	0.000959923	yes
BnaA01g07050D	chrA01:3326351-3327724	Purple	Green	OK	2.95755	19.5757	2.72659	3.53466	0.0002	0.00316579	yes
BnaA01g07140D	chrA01:3358294-3359872	Purple	Green	OK	7.83618	18.5654	1.24439	2.06054	0.0058	0.0436448	yes
BnaA01g07240D	chrA01:3422567-3423917	Purple	Green	OK	31.5015	0.877942	-5.16515	-5.62099	0.0007	0.00871608	yes
BnaA01g07460D	chrA01:3476415-3477901	Purple	Green	OK	26.1058	61.4244	1.23444	2.17248	0.0033	0.0289006	yes
BnaA01g07470D	chrA01:3478167-3479074	Purple	Green	OK	0	252.56	inf	#NAME?	5e-05	0.000959923	yes
BnaA01g07800D	chrA01:3700911-3703552	Purple	Green	OK	0	4.87133	inf	#NAME?	5e-05	0.000959923	yes
BnaA01g07860D	chrA01:3720432-3722668	Purple	Green	OK	21.5716	79.3749	1.87955	3.13734	5e-05	0.000959923	yes
BnaA01g07960D	chrA01:3752952-3758595	Purple	Green	OK	7.83637	18.5172	1.24061	1.87099	0.0048	0.0382235	yes
BnaA01g08020D	chrA01:3793922-3796384	Purple	Green	OK	6.72794	0.916599	-2.8758	-3.04897	0.0033	0.0289006	yes
BnaA01g08240D	chrA01:3925510-3929918	Purple	Green	OK	1.40943	30.9965	4.45892	5.88099	5e-05	0.000959923	yes
BnaA01g08290D	chrA01:3945371-3948016	Purple	Green	OK	0.625128	4.59812	2.87882	3.17372	0.0018	0.0182563	yes
BnaA01g08360D	chrA01:4012479-4013826	Purple	Green	OK	6.29917	21.1196	1.74535	2.46911	0.00125	0.0138073	yes
BnaA01g08550D	chrA01:4085542-4086183	Purple	Green	OK	17.9939	68.2384	1.92307	2.89655	0.0002	0.00316579	yes
BnaA01g08630D	chrA01:4142356-4143686	Purple	Green	OK	45.9329	14.0463	-1.70934	-2.90608	0.00035	0.00494884	yes
BnaA01g08910D	chrA01:4332572-4333767	Purple	Green	OK	0	28.8436	inf	#NAME?	5e-05	0.000959923	yes
BnaA01g08940D	chrA01:4339718-4343137	Purple	Green	OK	2.28754	8.57228	1.90588	3.02263	5e-05	0.000959923	yes
BnaA01g09040D	chrA01:4389637-4396723	Purple	Green	OK	1.47193	4.15408	1.49682	2.20213	0.00285	0.0259893	yes
BnaA01g09250D	chrA01:4515662-4516740	Purple	Green	OK	5.76983	28.4811	2.3034	3.01154	0.0008	0.0096705	yes
BnaA01g09270D	chrA01:4521816-4523297	Purple	Green	OK	105.191	371.265	1.81943	2.66401	0.00055	0.00713795	yes
BnaA01g09370D	chrA01:4599633-4602454	Purple	Green	OK	3.8654	10.4291	1.43193	2.23813	0.00235	0.022422	yes
BnaA01g09390D	chrA01:4604513-4604933	Purple	Green	OK	14.6404	51.4801	1.81406	2.17234	0.006	0.0447159	yes
BnaA01g09540D	chrA01:4682508-4683346	Purple	Green	OK	136.941	12.0512	-3.5063	-5.01898	5e-05	0.000959923	yes
BnaA01g09550D	chrA01:4683570-4684466	Purple	Green	OK	21.5827	0	#NAME?	#NAME?	5e-05	0.000959923	yes
BnaA01g09640D	chrA01:4731662-4735031	Purple	Green	OK	23.0251	78.8432	1.77578	2.89402	0.0002	0.00316579	yes
BnaA01g09990D	chrA01:4961788-4964686	Purple	Green	OK	10.0668	25.3612	1.33302	2.18191	0.0033	0.0289006	yes
BnaA01g10020D	chrA01:4995217-4998864	Purple	Green	OK	0	2.9055	inf	#NAME?	5e-05	0.000959923	yes
BnaA01g10110D	chrA01:5038226-5038804	Purple	Green	OK	10.4888	86.5089	3.04399	4.50285	5e-05	0.000959923	yes
BnaA01g10330D	chrA01:5159136-5159517	Purple	Green	OK	5.81872	0	#NAME?	#NAME?	0.0001	0.00178191	yes
BnaA01g10360D	chrA01:5178351-5179997	Purple	Green	OK	6.65199	25.4609	1.93642	2.9799	5e-05	0.000959923	yes
BnaA01g10370D	chrA01:5180292-5181178	Purple	Green	OK	3.84612	89.5047	4.54049	4.79006	0.00025	0.00378451	yes
BnaA01g10410D	chrA01:5195681-5197619	Purple	Green	OK	1.21348	6.41043	2.40127	3.11506	0.00055	0.00713795	yes
BnaA01g10460D	chrA01:5220488-5222564	Purple	Green	OK	3.36451	10.813	1.6843	2.44378	0.00195	0.0194267	yes
BnaA01g10520D	chrA01:5263280-5263544	Purple	Green	OK	0	17.6587	inf	#NAME?	5e-05	0.000959923	yes
BnaA01g10550D	chrA01:5279388-5280801	Purple	Green	OK	67.1471	688.371	3.35779	4.65437	5e-05	0.000959923	yes
BnaA01g10620D	chrA01:5299628-5303058	Purple	Green	OK	1.0652	4.4795	2.07221	2.69541	0.00105	0.0120086	yes
BnaA01g10670D	chrA01:5323121-5324556	Purple	Green	OK	5.226	21.0429	2.00955	3.0379	0.00055	0.00713795	yes
BnaA01g10960D	chrA01:5468151-5471349	Purple	Green	OK	0.495823	2.88601	2.54118	2.623	0.0058	0.0436448	yes
BnaA01g11040D	chrA01:5495074-5495981	Purple	Green	OK	6.66241	0	#NAME?	#NAME?	5e-05	0.000959923	yes
BnaA01g11070D	chrA01:5506700-5521052	Purple	Green	OK	8.61401	3.16849	-1.44289	-2.30783	0.0026	0.0242646	yes
BnaA01g11090D	chrA01:5523680-5526372	Purple	Green	OK	3.94937	14.9781	1.92316	3.09978	0.00015	0.00250346	yes
BnaA01g11100D	chrA01:5526659-5527901	Purple	Green	OK	18.1211	47.0423	1.37629	2.42134	0.00235	0.022422	yes
BnaA01g11320D	chrA01:5637102-5638944	Purple	Green	OK	14.9745	34.2867	1.19515	1.96828	0.00655	0.0475764	yes
BnaA01g11600D	chrA01:5794559-5796730	Purple	Green	OK	14.9063	41.2595	1.4688	2.52079	0.00045	0.00606143	yes
BnaA01g11660D	chrA01:5826887-5827735	Purple	Green	OK	7.50736	90.8415	3.59697	5.14936	5e-05	0.000959923	yes
BnaA01g11760D	chrA01:5863606-5867151	Purple	Green	OK	15.0119	1.45845	-3.36359	-4.16275	0.00025	0.00378451	yes
BnaA01g11780D	chrA01:5881093-5884053	Purple	Green	OK	2.7716	0	#NAME?	#NAME?	5e-05	0.000959923	yes
BnaA01g11930D	chrA01:5991358-5995044	Purple	Green	OK	1.00109	3.97241	1.98845	2.46921	0.0037	0.0316626	yes
BnaA01g12040D	chrA01:6038996-6039802	Purple	Green	OK	34.3031	214.116	2.64198	4.2709	5e-05	0.000959923	yes
BnaA01g12530D	chrA01:6294404-6295826	Purple	Green	OK	24.0579	4.005	-2.58664	-3.60888	0.0001	0.00178191	yes
BnaA01g12890D	chrA01:6454913-6455912	Purple	Green	OK	19.0244	0	#NAME?	#NAME?	5e-05	0.000959923	yes
BnaA01g12920D	chrA01:6470984-6473566	Purple	Green	OK	7.17893	2.02361	-1.82684	-2.63412	0.00085	0.0101314	yes
BnaA01g12940D	chrA01:6477870-6481225	Purple	Green	OK	6.59984	0	#NAME?	#NAME?	5e-05	0.000959923	yes
BnaA01g13130D	chrA01:6592570-6595308	Purple	Green	OK	26.5113	63.6958	1.26459	2.16214	0.00335	0.0292424	yes
BnaA01g13190D	chrA01:6628749-6630170	Purple	Green	OK	2.77211	0	#NAME?	#NAME?	0.00495	0.0388809	yes
BnaA01g13280D	chrA01:6719646-6721806	Purple	Green	OK	209.459	15.6641	-3.74113	-5.83458	5e-05	0.000959923	yes
BnaA01g13310D	chrA01:6729722-6730955	Purple	Green	OK	53.9688	139.179	1.36674	2.25391	0.0019	0.0190531	yes
BnaA01g13620D	chrA01:6926887-6930360	Purple	Green	OK	27.5356	1.65002	-4.06074	-5.12883	5e-05	0.000959923	yes
BnaA01g13630D	chrA01:6945299-6947372	Purple	Green	OK	3.25369	12.4702	1.93833	2.67697	0.00095	0.0110606	yes
BnaA01g13690D	chrA01:6972995-6973436	Purple	Green	OK	44.5291	14.779	-1.5912	-2.29903	0.00315	0.0280359	yes
BnaA01g13760D	chrA01:6996078-7001009	Purple	Green	OK	4.45395	15.2687	1.77742	3.00144	0.0001	0.00178191	yes
BnaA01g13770D	chrA01:7013639-7013969	Purple	Green	OK	100.497	27.443	-1.87265	-2.58752	0.00155	0.0163505	yes
BnaA01g13860D	chrA01:7044637-7046806	Purple	Green	OK	39.6805	11.2869	-1.81378	-3.05616	0.00015	0.00250346	yes
BnaA01g13990D	chrA01:7104485-7107682	Purple	Green	OK	9.89648	27.0402	1.45012	2.45968	0.00055	0.00713795	yes
BnaA01g14020D	chrA01:7120684-7121362	Purple	Green	OK	6.74611	30.8146	2.19149	3.08205	0.00025	0.00378451	yes
BnaA01g14030D	chrA01:7126385-7129500	Purple	Green	OK	6.65098	23.3636	1.81262	2.89824	0.0001	0.00178191	yes
BnaA01g14040D	chrA01:7131521-7137004	Purple	Green	OK	2.85875	6.88323	1.2677	2.12784	0.0041	0.0343079	yes
BnaA01g14240D	chrA01:7213531-7216317	Purple	Green	OK	2.67381	9.97615	1.89959	2.83091	0.0008	0.0096705	yes
BnaA01g14450D	chrA01:7296964-7299641	Purple	Green	OK	21.398	84.5657	1.98259	2.54405	0.0012	0.0133692	yes
BnaA01g14880D	chrA01:7510053-7512207	Purple	Green	OK	18.7174	46.2183	1.30408	2.2184	0.0022	0.0212956	yes
BnaA01g14920D	chrA01:7518365-7518947	Purple	Green	OK	18.2099	4.24919	-2.09946	-2.67607	0.00245	0.0231894	yes
BnaA01g14940D	chrA01:7524614-7526525	Purple	Green	OK	8.03223	22.5475	1.4891	2.29599	0.00265	0.0246127	yes
BnaA01g14950D	chrA01:7528930-7531095	Purple	Green	OK	9.84867	2.89953	-1.76411	-2.23583	0.00385	0.0327296	yes
BnaA01g15080D	chrA01:7689791-7691591	Purple	Green	OK	46.3863	9.29867	-2.3186	-3.69773	5e-05	0.000959923	yes
BnaA01g15590D	chrA01:7984178-7986414	Purple	Green	OK	3.63126	11.2006	1.62504	2.61629	0.0006	0.00768631	yes
BnaA01g15620D	chrA01:8011608-8012658	Purple	Green	OK	10.0871	45.108	2.16087	3.38063	5e-05	0.000959923	yes
BnaA01g15810D	chrA01:8110093-8113001	Purple	Green	OK	14.3765	4.14512	-1.79422	-2.92022	0.00015	0.00250346	yes
BnaA01g15960D	chrA01:8187107-8188661	Purple	Green	OK	4.56957	16.0874	1.8158	2.38632	0.00285	0.0259893	yes
BnaA01g16090D	chrA01:8240468-8241365	Purple	Green	OK	1.20948	13.1681	3.44459	3.4769	0.0017	0.0174453	yes
BnaA01g16330D	chrA01:8418470-8420602	Purple	Green	OK	9.26311	1.73013	-2.42062	-3.31877	0.0006	0.00768631	yes
BnaA01g16340D	chrA01:8420816-8421667	Purple	Green	OK	3.14622	0	#NAME?	#NAME?	0.0003	0.0043708	yes
BnaA01g16530D	chrA01:8561351-8562424	Purple	Green	OK	28.2992	73.8331	1.38351	2.34463	0.00135	0.0146315	yes
BnaA01g16700D	chrA01:8712116-8714403	Purple	Green	OK	31.7751	0.593656	-5.74213	-6.30684	0.0003	0.0043708	yes
BnaA01g16710D	chrA01:8718496-8722214	Purple	Green	OK	20.7096	6.35259	-1.70489	-2.83989	5e-05	0.000959923	yes
BnaA01g16850D	chrA01:8812036-8813093	Purple	Green	OK	30.1822	11.7424	-1.36197	-2.07189	0.00515	0.0400755	yes
BnaA01g16970D	chrA01:8853676-8855090	Purple	Green	OK	16.9907	2.32036	-2.87232	-3.50195	0.0018	0.0182563	yes
BnaA01g16990D	chrA01:8856959-8858168	Purple	Green	OK	2.54172	17.2409	2.76196	3.41654	0.0003	0.0043708	yes
BnaA01g17010D	chrA01:8862317-8862578	Purple	Green	OK	23.0097	0	#NAME?	#NAME?	5e-05	0.000959923	yes
BnaA01g17450D	chrA01:9202148-9204251	Purple	Green	OK	14.3346	36.2921	1.34016	2.28081	0.00145	0.0154949	yes
BnaA01g17570D	chrA01:9295009-9296950	Purple	Green	OK	18.3497	158.577	3.11136	5.00931	5e-05	0.000959923	yes
BnaA01g17940D	chrA01:9483861-9485751	Purple	Green	OK	7.52254	24.5069	1.7039	2.92113	0.0003	0.0043708	yes
BnaA01g18180D	chrA01:9700048-9701488	Purple	Green	OK	14.8548	3.70283	-2.00423	-2.86459	0.0008	0.0096705	yes
BnaA01g18960D	chrA01:10416246-10419574	Purple	Green	OK	2.77259	8.40345	1.59975	2.29873	0.0022	0.0212956	yes
BnaA01g19020D	chrA01:10503924-10507344	Purple	Green	OK	3.70468	10.4113	1.49072	2.19896	0.00435	0.0358652	yes
BnaA01g19110D	chrA01:10617288-10618256	Purple	Green	OK	0	93.1263	inf	#NAME?	5e-05	0.000959923	yes
BnaA01g19200D	chrA01:10738856-10741436	Purple	Green	OK	3.91923	0.456766	-3.10104	-2.9854	0.00355	0.0305691	yes
BnaA01g19300D	chrA01:10832890-10835005	Purple	Green	OK	7.15387	23.4195	1.71092	2.64576	0.0003	0.0043708	yes
BnaA01g19870D	chrA01:11512563-11514369	Purple	Green	OK	11.6008	1.83436	-2.66088	-3.84662	5e-05	0.000959923	yes
BnaA01g20340D	chrA01:12184978-12187035	Purple	Green	OK	10.8297	3.36295	-1.68719	-2.55441	0.00075	0.00921228	yes
BnaA01g20350D	chrA01:12192034-12194004	Purple	Green	OK	2.70572	0	#NAME?	#NAME?	5e-05	0.000959923	yes
BnaA01g20660D	chrA01:12506390-12514190	Purple	Green	OK	30.3432	10.4128	-1.54302	-2.45966	0.00065	0.00821581	yes
BnaA01g21560D	chrA01:13859973-13862571	Purple	Green	OK	3.6315	25.6796	2.82198	3.55349	5e-05	0.000959923	yes
BnaA01g21580D	chrA01:13876248-13877667	Purple	Green	OK	0	3.68033	inf	#NAME?	5e-05	0.000959923	yes
BnaA01g21720D	chrA01:14051794-14053359	Purple	Green	OK	20.298	93.697	2.20666	3.42639	5e-05	0.000959923	yes
BnaA01g21750D	chrA01:14078882-14082341	Purple	Green	OK	0.596925	6.77457	3.50451	3.2371	0.0042	0.0350142	yes
BnaA01g22130D	chrA01:14483863-14484250	Purple	Green	OK	0	31.2697	inf	#NAME?	5e-05	0.000959923	yes
BnaA01g22260D	chrA01:14612885-14616315	Purple	Green	OK	22.3465	9.92804	-1.17047	-2.01675	0.00665	0.0480329	yes
BnaA01g22340D	chrA01:14680202-14685780	Purple	Green	OK	0.977311	3.97912	2.02556	2.42957	0.00315	0.0280359	yes
BnaA01g23180D	chrA01:15572380-15575295	Purple	Green	OK	14.2832	4.34898	-1.71557	-2.66434	0.00035	0.00494884	yes
BnaA01g23290D	chrA01:15664780-15665548	Purple	Green	OK	0	2.06858	inf	#NAME?	5e-05	0.000959923	yes
BnaA01g23550D	chrA01:15912392-15913208	Purple	Green	OK	33.4759	95.8961	1.51835	2.70566	0.00055	0.00713795	yes
BnaA01g23690D	chrA01:16102133-16102565	Purple	Green	OK	3.15642	0	#NAME?	#NAME?	0.00175	0.0178682	yes
BnaA01g23850D	chrA01:16274854-16279656	Purple	Green	OK	85.6042	258.507	1.59445	2.66448	0.0002	0.00316579	yes
BnaA01g24190D	chrA01:16610184-16610784	Purple	Green	OK	37.6496	9.86715	-1.93193	-2.76846	0.0007	0.00871608	yes
BnaA01g24300D	chrA01:16691438-16692319	Purple	Green	OK	4.80441	0	#NAME?	#NAME?	0.00495	0.0388809	yes
BnaA01g24310D	chrA01:16695103-16696813	Purple	Green	OK	0.889433	7.10131	2.99713	3.34593	0.0014	0.0150511	yes
BnaA01g24440D	chrA01:16799650-16800534	Purple	Green	OK	10.1795	143.137	3.81367	5.58006	5e-05	0.000959923	yes
BnaA01g24750D	chrA01:17131512-17134202	Purple	Green	OK	27.001	3.719	-2.86003	-4.11443	5e-05	0.000959923	yes
BnaA01g24810D	chrA01:17175094-17181120	Purple	Green	OK	28.7717	0.837623	-5.10221	-6.15763	5e-05	0.000959923	yes
BnaA01g24820D	chrA01:17183576-17187020	Purple	Green	OK	28.2311	11.6888	-1.27216	-2.11302	0.0031	0.0276948	yes
BnaA01g24950D	chrA01:17387695-17394996	Purple	Green	OK	0	4.51344	inf	#NAME?	5e-05	0.000959923	yes
BnaA01g25000D	chrA01:17493143-17493701	Purple	Green	OK	31.3359	10.3257	-1.60158	-2.19497	0.00455	0.0370417	yes
BnaA01g25090D	chrA01:17519328-17521317	Purple	Green	OK	2.50449	0	#NAME?	#NAME?	5e-05	0.000959923	yes
BnaA01g25290D	chrA01:17700597-17701961	Purple	Green	OK	28.4314	91.2688	1.68264	2.83358	0.0001	0.00178191	yes
BnaA01g25860D	chrA01:18040759-18043435	Purple	Green	OK	35.9255	15.039	-1.2563	-2.18924	0.00405	0.0340029	yes
BnaA01g25880D	chrA01:18055031-18056976	Purple	Green	OK	18.4898	95.8617	2.37422	3.89448	5e-05	0.000959923	yes
BnaA01g25910D	chrA01:18062671-18069055	Purple	Green	OK	4.29601	11.6253	1.4362	2.41622	0.00105	0.0120086	yes
BnaA01g26060D	chrA01:18163955-18164267	Purple	Green	OK	12.5608	0	#NAME?	#NAME?	0.00085	0.0101314	yes
BnaA01g26100D	chrA01:18195050-18195371	Purple	Green	OK	0	40.0828	inf	#NAME?	5e-05	0.000959923	yes
BnaA01g26500D	chrA01:18563055-18564438	Purple	Green	OK	116.686	43.8851	-1.41082	-2.36754	0.0007	0.00871608	yes
BnaA01g26560D	chrA01:18595344-18595784	Purple	Green	OK	173.084	526.071	1.60378	2.7098	0.00025	0.00378451	yes
BnaA01g27160D	chrA01:18966876-18970369	Purple	Green	OK	0.594457	3.80136	2.67687	3.04252	0.0013	0.0142051	yes
BnaA01g27280D	chrA01:19057016-19057729	Purple	Green	OK	0	5.08321	inf	#NAME?	0.0009	0.0105621	yes
BnaA01g27420D	chrA01:19166358-19168154	Purple	Green	OK	9.27668	25.43	1.45485	2.38467	0.00155	0.0163505	yes
BnaA01g27460D	chrA01:19200186-19201163	Purple	Green	OK	101.512	30.0777	-1.75489	-2.86895	0.00015	0.00250346	yes
BnaA01g27810D	chrA01:19399932-19401181	Purple	Green	OK	11.8454	52.9135	2.15932	3.12489	5e-05	0.000959923	yes
BnaA01g27900D	chrA01:19440185-19442887	Purple	Green	OK	9.33098	22.6431	1.27897	2.17321	0.00185	0.0186879	yes
BnaA01g27940D	chrA01:19481198-19481898	Purple	Green	OK	0	2.2628	inf	#NAME?	0.0019	0.0190531	yes
BnaA01g28190D	chrA01:19684663-19685940	Purple	Green	OK	0.863402	9.59861	3.47472	3.25344	0.00535	0.0412406	yes
BnaA01g28200D	chrA01:19689166-19689857	Purple	Green	OK	68.4079	176.593	1.36819	2.18454	0.0025	0.0235998	yes
BnaA01g28250D	chrA01:19720109-19723202	Purple	Green	OK	4.33246	17.3811	2.00426	3.31878	0.0001	0.00178191	yes
BnaA01g28380D	chrA01:19810099-19810780	Purple	Green	OK	2.29959	0	#NAME?	#NAME?	0.0002	0.00316579	yes
BnaA01g28440D	chrA01:19833352-19834804	Purple	Green	OK	0	2.5162	inf	#NAME?	5e-05	0.000959923	yes
BnaA01g29080D	chrA01:20144859-20146653	Purple	Green	OK	2.5814	25.7332	3.31741	4.94281	5e-05	0.000959923	yes
BnaA01g29140D	chrA01:20167282-20173388	Purple	Green	OK	23.2653	4.35566	-2.41722	-3.83333	5e-05	0.000959923	yes
BnaA01g29260D	chrA01:20222275-20224309	Purple	Green	OK	10.064	28.3084	1.49203	2.5823	0.0008	0.0096705	yes
BnaA01g29420D	chrA01:20347105-20349169	Purple	Green	OK	166.641	49.1071	-1.76274	-2.76081	0.00045	0.00606143	yes
BnaA01g29470D	chrA01:20397297-20400248	Purple	Green	OK	100.352	10.2013	-3.29825	-5.1641	5e-05	0.000959923	yes
BnaA01g29520D	chrA01:20452596-20453932	Purple	Green	OK	8.94722	36.3472	2.02234	2.96478	0.0005	0.0066097	yes
BnaA01g29910D	chrA01:20651884-20653575	Purple	Green	OK	7.24273	20.3453	1.49009	2.32089	0.0016	0.016684	yes
BnaA01g30080D	chrA01:20700954-20703177	Purple	Green	OK	0	2.49821	inf	#NAME?	5e-05	0.000959923	yes
BnaA01g30100D	chrA01:20707594-20709688	Purple	Green	OK	0	2.37765	inf	#NAME?	5e-05	0.000959923	yes
BnaA01g30110D	chrA01:20713218-20715067	Purple	Green	OK	1.50462	18.1767	3.59462	4.5742	5e-05	0.000959923	yes
BnaA01g30150D	chrA01:20729396-20736591	Purple	Green	OK	0.232044	3.78784	4.0289	4.41173	0.0005	0.0066097	yes
BnaA01g30180D	chrA01:20742745-20745396	Purple	Green	OK	0.464849	5.82457	3.64732	3.34261	0.00295	0.0266619	yes
BnaA01g30200D	chrA01:20761175-20762182	Purple	Green	OK	0	26.571	inf	#NAME?	5e-05	0.000959923	yes
BnaA01g30210D	chrA01:20767200-20768351	Purple	Green	OK	0	11.3771	inf	#NAME?	5e-05	0.000959923	yes
BnaA01g30270D	chrA01:20809140-20809452	Purple	Green	OK	75.1941	0	#NAME?	#NAME?	5e-05	0.000959923	yes
BnaA01g30280D	chrA01:20812937-20813546	Purple	Green	OK	0	15.1193	inf	#NAME?	5e-05	0.000959923	yes
BnaA01g30320D	chrA01:20838900-20841051	Purple	Green	OK	0.680411	90.3732	7.05334	6.89933	0.0009	0.0105621	yes
BnaA01g30370D	chrA01:20856950-20859072	Purple	Green	OK	0	14.391	inf	#NAME?	5e-05	0.000959923	yes
BnaA01g30410D	chrA01:20875985-20879818	Purple	Green	OK	0	5.57496	inf	#NAME?	5e-05	0.000959923	yes
BnaA01g30430D	chrA01:20890820-20893665	Purple	Green	OK	0	2.31763	inf	#NAME?	5e-05	0.000959923	yes
BnaA01g30440D	chrA01:20895228-20895699	Purple	Green	OK	0	8.1875	inf	#NAME?	5e-05	0.000959923	yes
BnaA01g30450D	chrA01:20903650-20905259	Purple	Green	OK	0.912958	6.05202	2.7288	2.84038	0.0042	0.0350142	yes
BnaA01g30580D	chrA01:20947664-20949392	Purple	Green	OK	0	7.32711	inf	#NAME?	5e-05	0.000959923	yes
BnaA01g30630D	chrA01:20974638-20975709	Purple	Green	OK	11.2703	173.733	3.94627	5.84761	5e-05	0.000959923	yes
BnaA01g30730D	chrA01:21006004-21010545	Purple	Green	OK	0	5.73006	inf	#NAME?	5e-05	0.000959923	yes
BnaA01g30750D	chrA01:21011754-21012287	Purple	Green	OK	0	52.8024	inf	#NAME?	5e-05	0.000959923	yes
BnaA01g30810D	chrA01:21036971-21038607	Purple	Green	OK	0	9.55729	inf	#NAME?	5e-05	0.000959923	yes
BnaA01g30830D	chrA01:21042541-21043677	Purple	Green	OK	5.06771	15.48	1.611	2.32331	0.0038	0.0323626	yes
BnaA01g30930D	chrA01:21082147-21086035	Purple	Green	OK	2.87481	8.64448	1.58831	2.6198	0.00045	0.00606143	yes
BnaA01g30950D	chrA01:21090012-21091927	Purple	Green	OK	0	14.7746	inf	#NAME?	5e-05	0.000959923	yes
BnaA01g31120D	chrA01:21171302-21173192	Purple	Green	OK	0	4.86988	inf	#NAME?	5e-05	0.000959923	yes
BnaA01g31170D	chrA01:21188811-21197074	Purple	Green	OK	2.77033	9.23664	1.73731	2.94142	5e-05	0.000959923	yes
BnaA01g31320D	chrA01:21292918-21293293	Purple	Green	OK	4.05246	0	#NAME?	#NAME?	0.0024	0.0227971	yes
BnaA01g31350D	chrA01:21346997-21348077	Purple	Green	OK	11.1588	137.586	3.62409	5.37851	5e-05	0.000959923	yes
BnaA01g31420D	chrA01:21373133-21375119	Purple	Green	OK	0.985406	7.32735	2.8945	3.57627	0.00025	0.00378451	yes
BnaA01g31440D	chrA01:21379223-21380643	Purple	Green	OK	2.01709	9.59453	2.24994	2.60346	0.00315	0.0280359	yes
BnaA01g31520D	chrA01:21419960-21424052	Purple	Green	OK	0.396421	3.09469	2.96469	3.16959	0.002	0.0198091	yes
BnaA01g31620D	chrA01:21473611-21473992	Purple	Green	OK	42.7863	11.2793	-1.92347	-2.28207	0.005	0.0391798	yes
BnaA01g31810D	chrA01:21542567-21550464	Purple	Green	OK	2.32774	5.66411	1.28292	2.03876	0.0053	0.0409662	yes
BnaA01g32000D	chrA01:21644698-21648059	Purple	Green	OK	31.4767	102.56	1.70412	2.78562	0.0002	0.00316579	yes
BnaA01g32030D	chrA01:21657361-21660293	Purple	Green	OK	20.8611	46.7739	1.16489	1.94346	0.0048	0.0382235	yes
BnaA01g32180D	chrA01:21703585-21705633	Purple	Green	OK	17.6302	76.4259	2.11601	3.58927	5e-05	0.000959923	yes
BnaA01g32200D	chrA01:21708407-21710273	Purple	Green	OK	0	2.15958	inf	#NAME?	5e-05	0.000959923	yes
BnaA01g32210D	chrA01:21717265-21720735	Purple	Green	OK	4.79347	13.8886	1.53476	2.60875	0.0007	0.00871608	yes
BnaA01g32290D	chrA01:21755870-21757584	Purple	Green	OK	2.55393	49.5115	4.27697	5.96979	5e-05	0.000959923	yes
BnaA01g32340D	chrA01:21779680-21780376	Purple	Green	OK	30.0487	3.31579	-3.17988	-3.7388	0.00065	0.00821581	yes
BnaA01g32460D	chrA01:21871502-21872528	Purple	Green	OK	0	3.35602	inf	#NAME?	5e-05	0.000959923	yes
BnaA01g32490D	chrA01:21878396-21881534	Purple	Green	OK	0.551006	4.10241	2.89633	2.87378	0.003	0.0270165	yes
BnaA01g32860D	chrA01:22186177-22188255	Purple	Green	OK	17.5588	42.1717	1.26408	2.11321	0.0037	0.0316626	yes
BnaA01g33010D	chrA01:22353368-22355357	Purple	Green	OK	15.2388	59.391	1.9625	3.30248	5e-05	0.000959923	yes
BnaA01g33250D	chrA01:22557334-22559157	Purple	Green	OK	9.77411	28.2359	1.53049	2.49146	0.00095	0.0110606	yes
BnaA01g33500D	chrA01:22699697-22702639	Purple	Green	OK	32.6627	98.308	1.58967	2.61703	0.0004	0.0055115	yes
BnaA01g33530D	chrA01:22709121-22711083	Purple	Green	OK	2.50777	8.84731	1.81883	2.37377	0.003	0.0270165	yes
BnaA01g33560D	chrA01:22725016-22726429	Purple	Green	OK	31.0448	212.397	2.77434	4.30468	5e-05	0.000959923	yes
BnaA01g33590D	chrA01:22744190-22746764	Purple	Green	OK	3.46673	17.6597	2.34882	3.56903	5e-05	0.000959923	yes
BnaA01g33600D	chrA01:22747396-22749995	Purple	Green	OK	5.3899	16.9072	1.64931	2.64855	0.0004	0.0055115	yes
BnaA01g33620D	chrA01:22757905-22761872	Purple	Green	OK	15.4198	68.3667	2.1485	3.54518	5e-05	0.000959923	yes
BnaA01g33650D	chrA01:22776019-22776460	Purple	Green	OK	60.4176	290.127	2.26364	3.7945	5e-05	0.000959923	yes
BnaA01g33660D	chrA01:22777814-22780291	Purple	Green	OK	36.6184	199.882	2.44851	3.98139	5e-05	0.000959923	yes
BnaA01g33700D	chrA01:22789852-22794992	Purple	Green	OK	7.52189	20.3548	1.4362	2.47074	0.0006	0.00768631	yes
BnaA01g33790D	chrA01:22900645-22900999	Purple	Green	OK	0	16.8662	inf	#NAME?	5e-05	0.000959923	yes
BnaA01g33840D	chrA01:22921825-22924707	Purple	Green	OK	15.3227	70.3294	2.19846	3.51898	5e-05	0.000959923	yes
BnaA01g33870D	chrA01:22936339-22937269	Purple	Green	OK	13.969	39.6228	1.5041	2.20113	0.0027	0.0249252	yes
BnaA01g34020D	chrA01:23007990-23011074	Purple	Green	OK	0.893579	3.45771	1.95215	2.61056	0.0018	0.0182563	yes
BnaA01g34070D	chrA01:23040181-23042076	Purple	Green	OK	26.1048	93.214	1.83623	3.03395	5e-05	0.000959923	yes
BnaA01g34190D	chrA01:23076226-23076520	Purple	Green	OK	88.3794	266.793	1.59394	2.08056	0.007	0.0498936	yes
BnaA01g34230D	chrA01:23084824-23086483	Purple	Green	OK	1.4088	5.71879	2.02125	2.32626	0.0028	0.0256155	yes
BnaA01g34410D	chrA01:23224829-23232728	Purple	Green	OK	2.21455	14.4131	2.7023	4.28391	5e-05	0.000959923	yes
BnaA01g34490D	chrA01_random:3590-5044	Purple	Green	OK	12.5324	39.9508	1.67256	2.75488	0.00035	0.00494884	yes
BnaA01g34610D	chrA01_random:55859-57664	Purple	Green	OK	52.9098	12.5926	-2.07095	-3.1243	0.0001	0.00178191	yes
BnaA01g34650D	chrA01_random:71017-71557	Purple	Green	OK	17.8673	47.7758	1.41896	2.20977	0.0027	0.0249252	yes
BnaA01g34670D	chrA01_random:74578-76171	Purple	Green	OK	6.62983	36.7152	2.46933	3.83228	5e-05	0.000959923	yes
BnaA01g34810D	chrA01_random:146984-154264	Purple	Green	OK	7.0782	16.1391	1.18911	2.01902	0.00555	0.0422857	yes
BnaA01g34970D	chrA01_random:293111-294737	Purple	Green	OK	62.7791	10.908	-2.5249	-3.72636	5e-05	0.000959923	yes
BnaA01g35060D	chrA01_random:363873-365580	Purple	Green	OK	77.8365	24.2608	-1.68182	-2.86458	0.0003	0.0043708	yes
BnaA01g35370D	chrA01_random:575709-578415	Purple	Green	OK	1.14991	4.54912	1.98407	2.80711	0.00105	0.0120086	yes
BnaA01g35820D	chrA01_random:1297652-1302373	Purple	Green	OK	1.59946	4.19606	1.39146	2.02503	0.0053	0.0409662	yes
BnaA01g35850D	chrA01_random:1338648-1340394	Purple	Green	OK	16.3428	62.1952	1.92815	3.23107	5e-05	0.000959923	yes
BnaA01g36280D	chrA01_random:1696606-1698169	Purple	Green	OK	0.743752	78.5402	6.72247	6.12719	0.00405	0.0340029	yes
BnaA01g36290D	chrA01_random:1725612-1726605	Purple	Green	OK	0	3.38109	inf	#NAME?	0.0004	0.0055115	yes
BnaA01g36380D	chrA01_random:1943825-1946403	Purple	Green	OK	6.684	0	#NAME?	#NAME?	5e-05	0.000959923	yes
BnaA01g36450D	chrA01_random:2003966-2004187	Purple	Green	OK	0	310.61	inf	#NAME?	0.00295	0.0266619	yes
BnaA01g36480D	chrA01_random:2022606-2023647	Purple	Green	OK	10.322	1.4116	-2.87032	-3.01931	0.002	0.0198091	yes
BnaA01g36620D	chrA01_random:2128664-2134375	Purple	Green	OK	3.27107	7.55247	1.20718	2.05993	0.00445	0.0364222	yes
BnaA01g36840D	chrA01_random:2307993-2309808	Purple	Green	OK	8.0946	2.977	-1.4431	-2.10123	0.007	0.0498936	yes
BnaA01g36920D	chrA01_random:2380562-2381744	Purple	Green	OK	7.28878	38.9531	2.41799	3.8496	5e-05	0.000959923	yes
BnaA01g36980D	chrA01_random:2411191-2414223	Purple	Green	OK	1.90712	5.11149	1.42235	2.12459	0.00475	0.0379955	yes
BnaA01g37010D	chrA01_random:2426965-2428701	Purple	Green	OK	13.3223	1.02405	-3.70148	-3.56396	0.0011	0.0124635	yes
BnaA01g37130D	chrA01_random:2501041-2505026	Purple	Green	OK	7.48793	17.0341	1.18578	2.03292	0.00565	0.0428562	yes
BnaA01g37280D	chrA01_random:2589984-2590775	Purple	Green	OK	0	12.4818	inf	#NAME?	5e-05	0.000959923	yes
BnaA02g00180D	chrA02:66621-68671	Purple	Green	OK	3.35172	0	#NAME?	#NAME?	5e-05	0.000959923	yes
BnaA02g00210D	chrA02:81743-85292	Purple	Green	OK	15.1735	4.05455	-1.90394	-3.05317	0.00015	0.00250346	yes
BnaA02g00230D	chrA02:89946-93037	Purple	Green	OK	48.0344	21.6758	-1.14798	-1.95311	0.0062	0.0457984	yes
BnaA02g00300D	chrA02:107871-111100	Purple	Green	OK	8.84306	0.508408	-4.12049	-3.57913	0.0054	0.0415285	yes
BnaA02g00400D	chrA02:145911-148822	Purple	Green	OK	4.89255	1.43928	-1.76524	-2.14539	0.00485	0.0385497	yes
BnaA02g00410D	chrA02:153423-157061	Purple	Green	OK	6.03899	1.09143	-2.46809	-3.00007	0.0012	0.0133692	yes
BnaA02g00430D	chrA02:162956-165191	Purple	Green	OK	7.53772	1.52386	-2.3064	-2.59739	0.0026	0.0242646	yes
BnaA02g00460D	chrA02:181475-181918	Purple	Green	OK	37.7635	0	#NAME?	#NAME?	5e-05	0.000959923	yes
BnaA02g00470D	chrA02:183466-184740	Purple	Green	OK	11.114	122.445	3.46168	5.27187	5e-05	0.000959923	yes
BnaA02g00490D	chrA02:186684-189010	Purple	Green	OK	34.7232	7.14967	-2.27995	-3.67743	5e-05	0.000959923	yes
BnaA02g00620D	chrA02:235229-239116	Purple	Green	OK	11.3879	4.63382	-1.29723	-2.11374	0.00465	0.037626	yes
BnaA02g00650D	chrA02:244735-247643	Purple	Green	OK	30.8592	7.95257	-1.95621	-3.31387	5e-05	0.000959923	yes
BnaA02g00670D	chrA02:252647-254616	Purple	Green	OK	10.9902	3.18743	-1.78575	-2.15431	0.0041	0.0343079	yes
BnaA02g00680D	chrA02:258141-259680	Purple	Green	OK	76.4632	27.7569	-1.46192	-2.34718	0.00205	0.0202245	yes
BnaA02g00700D	chrA02:262524-265608	Purple	Green	OK	12.8295	1.89051	-2.76262	-3.49322	0.00015	0.00250346	yes
BnaA02g00740D	chrA02:272033-272959	Purple	Green	OK	75.0345	4.45991	-4.07247	-5.12964	0.0002	0.00316579	yes
BnaA02g00750D	chrA02:273927-275437	Purple	Green	OK	15.0513	1.461	-3.36486	-3.3524	0.00215	0.0209639	yes
BnaA02g00770D	chrA02:278245-281393	Purple	Green	OK	4.94583	1.56979	-1.65564	-2.19807	0.00545	0.0418	yes
BnaA02g00970D	chrA02:370975-371809	Purple	Green	OK	8.0514	0	#NAME?	#NAME?	5e-05	0.000959923	yes
BnaA02g01000D	chrA02:385420-387570	Purple	Green	OK	59.0102	222.633	1.91563	3.00954	0.0001	0.00178191	yes
BnaA02g01070D	chrA02:428985-431199	Purple	Green	OK	32.7501	15.0314	-1.12352	-1.92411	0.0067	0.0483123	yes
BnaA02g01220D	chrA02:539790-540465	Purple	Green	OK	2.16028	0	#NAME?	#NAME?	0.00015	0.00250346	yes
BnaA02g01300D	chrA02:587967-589968	Purple	Green	OK	8.04117	1.7546	-2.19627	-2.95575	0.0012	0.0133692	yes
BnaA02g01340D	chrA02:605646-609763	Purple	Green	OK	37.681	3.16984	-3.57136	-5.53404	5e-05	0.000959923	yes
BnaA02g01430D	chrA02:645813-646970	Purple	Green	OK	99.6963	39.6664	-1.32962	-2.3022	0.00175	0.0178682	yes
BnaA02g01540D	chrA02:723527-726664	Purple	Green	OK	18.0352	4.93628	-1.86932	-3.01416	5e-05	0.000959923	yes
BnaA02g01630D	chrA02:757738-759415	Purple	Green	OK	54.7754	19.2916	-1.50555	-2.52071	0.0008	0.0096705	yes
BnaA02g01710D	chrA02:788544-792543	Purple	Green	OK	13.6586	5.2002	-1.39317	-2.34065	0.00195	0.0194267	yes
BnaA02g01720D	chrA02:793640-795889	Purple	Green	OK	33.3024	12.6801	-1.39306	-2.31622	0.0021	0.0205893	yes
BnaA02g01820D	chrA02:835625-836893	Purple	Green	OK	127.854	53.7804	-1.24934	-2.11305	0.00245	0.0231894	yes
BnaA02g01880D	chrA02:856943-859819	Purple	Green	OK	5.83917	1.60366	-1.86439	-2.33528	0.0044	0.03611	yes
BnaA02g01970D	chrA02:894880-896015	Purple	Green	OK	101.745	37.609	-1.43581	-2.40823	0.0006	0.00768631	yes
BnaA02g02020D	chrA02:913642-915544	Purple	Green	OK	50.146	20.868	-1.26484	-2.12441	0.00265	0.0246127	yes
BnaA02g02190D	chrA02:958644-960703	Purple	Green	OK	19.8319	4.96379	-1.99831	-3.12431	5e-05	0.000959923	yes
BnaA02g02390D	chrA02:1057490-1061620	Purple	Green	OK	4.9301	1.21732	-2.01791	-2.93946	0.0003	0.0043708	yes
BnaA02g02460D	chrA02:1084432-1086187	Purple	Green	OK	24.5413	9.86355	-1.31503	-2.20556	0.00245	0.0231894	yes
BnaA02g02560D	chrA02:1140573-1141539	Purple	Green	OK	446.632	60.3926	-2.88664	-4.27954	5e-05	0.000959923	yes
BnaA02g02580D	chrA02:1154219-1156068	Purple	Green	OK	20.5825	7.211	-1.51315	-2.42919	0.00145	0.0154949	yes
BnaA02g02680D	chrA02:1205446-1208556	Purple	Green	OK	4.87021	1.40108	-1.79745	-2.55786	0.00165	0.0170553	yes
BnaA02g02940D	chrA02:1307513-1310479	Purple	Green	OK	206.106	30.9956	-2.73325	-4.17082	5e-05	0.000959923	yes
BnaA02g03140D	chrA02:1381666-1384015	Purple	Green	OK	391.395	107.492	-1.8644	-2.64208	0.00085	0.0101314	yes
BnaA02g03150D	chrA02:1389790-1391915	Purple	Green	OK	26.0306	8.26974	-1.6543	-2.79796	0.0002	0.00316579	yes
BnaA02g03360D	chrA02:1493940-1501379	Purple	Green	OK	18.2402	8.13924	-1.16416	-1.97349	0.00525	0.0406461	yes
BnaA02g03410D	chrA02:1523444-1525248	Purple	Green	OK	22.3014	7.00365	-1.67096	-2.43972	0.0019	0.0190531	yes
BnaA02g03790D	chrA02:1744671-1747560	Purple	Green	OK	8.08589	2.30933	-1.80793	-2.7069	0.00035	0.00494884	yes
BnaA02g03850D	chrA02:1769092-1771518	Purple	Green	OK	55.1172	17.2387	-1.67685	-2.85606	0.00015	0.00250346	yes
BnaA02g04200D	chrA02:1878295-1883883	Purple	Green	OK	16.1048	7.3164	-1.13829	-1.99272	0.0057	0.0431664	yes
BnaA02g04230D	chrA02:1894443-1896814	Purple	Green	OK	19.8461	7.5647	-1.3915	-2.32161	0.00205	0.0202245	yes
BnaA02g04340D	chrA02:1943703-1944153	Purple	Green	OK	259.643	88.4856	-1.55301	-2.66173	0.0004	0.0055115	yes
BnaA02g04470D	chrA02:2005578-2007253	Purple	Green	OK	107.183	38.1697	-1.48958	-2.49553	0.0004	0.0055115	yes
BnaA02g04600D	chrA02:2058620-2060720	Purple	Green	OK	34.209	10.7131	-1.675	-2.86601	0.0003	0.0043708	yes
BnaA02g04730D	chrA02:2097075-2098048	Purple	Green	OK	1.01461	56.6458	5.80297	5.09074	0.0033	0.0289006	yes
BnaA02g04750D	chrA02:2102044-2103061	Purple	Green	OK	186.622	73.5252	-1.34381	-2.1276	0.0029	0.0263271	yes
BnaA02g04870D	chrA02:2155059-2159558	Purple	Green	OK	1.98441	6.55804	1.72455	2.24254	0.0049	0.0388097	yes
BnaA02g05020D	chrA02:2220824-2226597	Purple	Green	OK	9.82322	3.14464	-1.6433	-2.06166	0.0065	0.0472938	yes
BnaA02g05080D	chrA02:2278430-2278991	Purple	Green	OK	2.44545	55.97	4.51648	4.33397	0.0009	0.0105621	yes
BnaA02g05120D	chrA02:2301701-2303055	Purple	Green	OK	54.742	21.7856	-1.32927	-2.16017	0.0041	0.0343079	yes
BnaA02g05360D	chrA02:2443986-2444822	Purple	Green	OK	20.0767	0	#NAME?	#NAME?	5e-05	0.000959923	yes
BnaA02g05440D	chrA02:2495326-2497819	Purple	Green	OK	39.8866	8.73458	-2.19109	-3.6124	0.00015	0.00250346	yes
BnaA02g05570D	chrA02:2562988-2565667	Purple	Green	OK	2.11768	8.52498	2.00921	2.63841	0.00155	0.0163505	yes
BnaA02g05610D	chrA02:2581863-2582481	Purple	Green	OK	1.79766	19.5597	3.44369	3.65855	0.0034	0.0295699	yes
BnaA02g05770D	chrA02:2651911-2654206	Purple	Green	OK	11.8963	4.13047	-1.52613	-2.32138	0.0023	0.0220633	yes
BnaA02g05840D	chrA02:2690163-2692782	Purple	Green	OK	45.8337	115.939	1.33888	2.02433	0.005	0.0391798	yes
BnaA02g06000D	chrA02:2773480-2776314	Purple	Green	OK	16.4154	5.43088	-1.59579	-2.53303	0.0004	0.0055115	yes
BnaA02g06210D	chrA02:2982729-2984804	Purple	Green	OK	2.04763	16.1464	2.97919	3.8408	0.0001	0.00178191	yes
BnaA02g06420D	chrA02:3063663-3065761	Purple	Green	OK	16.2561	4.18755	-1.95681	-2.83561	0.0004	0.0055115	yes
BnaA02g07060D	chrA02:3347627-3348851	Purple	Green	OK	15.4578	0	#NAME?	#NAME?	5e-05	0.000959923	yes
BnaA02g07120D	chrA02:3392616-3393094	Purple	Green	OK	11.2719	111.966	3.31226	4.01965	0.00025	0.00378451	yes
BnaA02g07320D	chrA02:3480457-3482714	Purple	Green	OK	12.2998	4.65233	-1.40261	-2.16114	0.00305	0.0273685	yes
BnaA02g07550D	chrA02:3584903-3590382	Purple	Green	OK	0	9.40492	inf	#NAME?	0.0001	0.00178191	yes
BnaA02g07640D	chrA02:3644901-3647865	Purple	Green	OK	5.94163	0	#NAME?	#NAME?	5e-05	0.000959923	yes
BnaA02g07650D	chrA02:3656486-3657599	Purple	Green	OK	35.1887	0	#NAME?	#NAME?	5e-05	0.000959923	yes
BnaA02g07700D	chrA02:3667931-3668393	Purple	Green	OK	0	14.9437	inf	#NAME?	0.0048	0.0382235	yes
BnaA02g07730D	chrA02:3669551-3671761	Purple	Green	OK	2.93556	13.7659	2.22939	3.15602	0.0001	0.00178191	yes
BnaA02g07740D	chrA02:3675962-3676964	Purple	Green	OK	99.5337	23.3885	-2.08939	-3.5224	5e-05	0.000959923	yes
BnaA02g07840D	chrA02:3718454-3723030	Purple	Green	OK	5.7327	1.40261	-2.0311	-3.00391	0.00035	0.00494884	yes
BnaA02g08050D	chrA02:3803443-3804237	Purple	Green	OK	0	9.57442	inf	#NAME?	0.00195	0.0194267	yes
BnaA02g08090D	chrA02:3811729-3815150	Purple	Green	OK	12.1936	72.8779	2.57935	4.21331	5e-05	0.000959923	yes
BnaA02g08330D	chrA02:3989196-3995826	Purple	Green	OK	17.8673	52.7974	1.56314	2.55365	0.00035	0.00494884	yes
BnaA02g08470D	chrA02:4127875-4132446	Purple	Green	OK	0.776574	3.87827	2.32022	2.85483	0.00125	0.0138073	yes
BnaA02g08530D	chrA02:4188585-4189285	Purple	Green	OK	127.038	309.05	1.28258	2.29618	0.0022	0.0212956	yes
BnaA02g09170D	chrA02:4534919-4537470	Purple	Green	OK	3.86603	12.5371	1.69728	2.78484	0.00035	0.00494884	yes
BnaA02g09180D	chrA02:4539638-4542193	Purple	Green	OK	50.4222	205.954	2.03019	3.11247	0.0001	0.00178191	yes
BnaA02g09260D	chrA02:4575241-4575475	Purple	Green	OK	12.6956	0	#NAME?	#NAME?	0.0024	0.0227971	yes
BnaA02g09400D	chrA02:4630178-4633255	Purple	Green	OK	3.22345	10.5017	1.70394	2.60179	0.0005	0.0066097	yes
BnaA02g09420D	chrA02:4664251-4666394	Purple	Green	OK	1.87875	6.50606	1.79201	2.18078	0.007	0.0498936	yes
BnaA02g10230D	chrA02:5184250-5186137	Purple	Green	OK	2.05371	9.34444	2.18587	2.60428	0.0022	0.0212956	yes
BnaA02g10330D	chrA02:5261375-5262375	Purple	Green	OK	277.831	74.8719	-1.89171	-3.19309	5e-05	0.000959923	yes
BnaA02g10410D	chrA02:5344288-5348536	Purple	Green	OK	12.3742	33.3809	1.43168	2.4406	0.0006	0.00768631	yes
BnaA02g10720D	chrA02:5544659-5545149	Purple	Green	OK	7.01427	0	#NAME?	#NAME?	5e-05	0.000959923	yes
BnaA02g10970D	chrA02:5700688-5702820	Purple	Green	OK	37.282	195.658	2.39178	3.7658	5e-05	0.000959923	yes
BnaA02g11080D	chrA02:5784216-5785908	Purple	Green	OK	1.56214	27.803	4.15365	4.76298	0.0001	0.00178191	yes
BnaA02g11420D	chrA02:5988177-5989655	Purple	Green	OK	11.9489	32.0224	1.4222	2.23404	0.00235	0.022422	yes
BnaA02g11430D	chrA02:5995398-5998478	Purple	Green	OK	636.145	152.681	-2.05883	-2.35678	0.0012	0.0133692	yes
BnaA02g12000D	chrA02:6283693-6286288	Purple	Green	OK	8.73115	29.7006	1.76625	2.94647	0.0001	0.00178191	yes
BnaA02g12040D	chrA02:6300925-6302673	Purple	Green	OK	5.87464	18.3559	1.64367	2.31591	0.0028	0.0256155	yes
BnaA02g12150D	chrA02:6401818-6403651	Purple	Green	OK	3.11814	13.5436	2.11885	2.87332	0.00075	0.00921228	yes
BnaA02g12330D	chrA02:6525310-6526075	Purple	Green	OK	6.4507	416.623	6.01314	7.48583	5e-05	0.000959923	yes
BnaA02g12430D	chrA02:6638470-6640472	Purple	Green	OK	39.9556	87.3508	1.12842	1.94496	0.0061	0.0452085	yes
BnaA02g12440D	chrA02:6670447-6672823	Purple	Green	OK	5.17092	15.1531	1.55113	2.42467	0.00215	0.0209639	yes
BnaA02g12540D	chrA02:6726558-6727984	Purple	Green	OK	33.4965	1.94926	-4.10301	-5.06139	0.0001	0.00178191	yes
BnaA02g12620D	chrA02:6781322-6787042	Purple	Green	OK	10.6646	2.19463	-2.28077	-3.5971	5e-05	0.000959923	yes
BnaA02g12660D	chrA02:6814937-6821273	Purple	Green	OK	4.91355	0.206412	-4.57316	-4.29287	0.0023	0.0220633	yes
BnaA02g12670D	chrA02:6821341-6824479	Purple	Green	OK	6.12914	0.590588	-3.37546	-2.89934	0.00685	0.0491199	yes
BnaA02g12880D	chrA02:6980981-7003223	Purple	Green	OK	2.62716	5.78193	1.13805	1.93638	0.0061	0.0452085	yes
BnaA02g13090D	chrA02:7170558-7170834	Purple	Green	OK	30.2692	173.58	2.51967	3.60829	0.00045	0.00606143	yes
BnaA02g13270D	chrA02:7290026-7291436	Purple	Green	OK	2.19083	0	#NAME?	#NAME?	0.00035	0.00494884	yes
BnaA02g13310D	chrA02:7312571-7314170	Purple	Green	OK	25.9693	59.5514	1.19733	2.06985	0.004	0.0336826	yes
BnaA02g13390D	chrA02:7371961-7377305	Purple	Green	OK	123.818	53.2503	-1.21736	-2.01495	0.0055	0.0420248	yes
BnaA02g13610D	chrA02:7466829-7477284	Purple	Green	OK	5.3748	1.11122	-2.27407	-3.23106	0.00015	0.00250346	yes
BnaA02g13920D	chrA02:7744039-7745458	Purple	Green	OK	18.849	2.61725	-2.84837	-4.09223	5e-05	0.000959923	yes
BnaA02g14020D	chrA02:7844811-7847251	Purple	Green	OK	8.71454	1.49982	-2.53864	-2.94825	0.0018	0.0182563	yes
BnaA02g14060D	chrA02:7902089-7902515	Purple	Green	OK	4.97098	0	#NAME?	#NAME?	5e-05	0.000959923	yes
BnaA02g14150D	chrA02:7954110-7956577	Purple	Green	OK	0.46136	2.90756	2.65584	2.89904	0.00485	0.0385497	yes
BnaA02g14490D	chrA02:8200894-8202227	Purple	Green	OK	23.603	6.78021	-1.79957	-2.30549	0.00345	0.0299194	yes
BnaA02g14680D	chrA02:8328323-8329871	Purple	Green	OK	11.854	2.84194	-2.06042	-2.9721	0.0002	0.00316579	yes
BnaA02g14780D	chrA02:8452392-8454450	Purple	Green	OK	2.21281	9.92141	2.16467	2.66247	0.0021	0.0205893	yes
BnaA02g14790D	chrA02:8465308-8468045	Purple	Green	OK	21.3747	0.702044	-4.9282	-5.98203	5e-05	0.000959923	yes
BnaA02g14850D	chrA02:8511479-8515384	Purple	Green	OK	19.5656	4.8023	-2.02652	-2.77509	0.00045	0.00606143	yes
BnaA02g15010D	chrA02:8629901-8633319	Purple	Green	OK	8.82511	20.2348	1.19715	2.03561	0.00455	0.0370417	yes
BnaA02g15230D	chrA02:8770278-8771153	Purple	Green	OK	7.26096	54.5201	2.90856	3.91583	5e-05	0.000959923	yes
BnaA02g15250D	chrA02:8775304-8775838	Purple	Green	OK	0	4.6545	inf	#NAME?	0.00015	0.00250346	yes
BnaA02g15280D	chrA02:8795212-8796107	Purple	Green	OK	0	3.88236	inf	#NAME?	0.00015	0.00250346	yes
BnaA02g15290D	chrA02:8822232-8827622	Purple	Green	OK	0	2.10435	inf	#NAME?	5e-05	0.000959923	yes
BnaA02g15330D	chrA02:8839927-8841448	Purple	Green	OK	0	3.70751	inf	#NAME?	5e-05	0.000959923	yes
BnaA02g15340D	chrA02:8842253-8843727	Purple	Green	OK	0	3.75816	inf	#NAME?	5e-05	0.000959923	yes
BnaA02g15380D	chrA02:8884282-8887445	Purple	Green	OK	1.07222	4.98805	2.21787	2.53236	0.00325	0.0286154	yes
BnaA02g15440D	chrA02:8945805-8946300	Purple	Green	OK	0	3.90318	inf	#NAME?	5e-05	0.000959923	yes
BnaA02g15460D	chrA02:8954458-8956894	Purple	Green	OK	0	7.24246	inf	#NAME?	5e-05	0.000959923	yes
BnaA02g15550D	chrA02:9003187-9003808	Purple	Green	OK	0	4.12475	inf	#NAME?	5e-05	0.000959923	yes
BnaA02g15640D	chrA02:9107458-9109262	Purple	Green	OK	0	16.7039	inf	#NAME?	5e-05	0.000959923	yes
BnaA02g15650D	chrA02:9110226-9114680	Purple	Green	OK	0	12.5112	inf	#NAME?	5e-05	0.000959923	yes
BnaA02g15680D	chrA02:9142569-9143397	Purple	Green	OK	0	169.605	inf	#NAME?	5e-05	0.000959923	yes
BnaA02g15700D	chrA02:9159884-9160520	Purple	Green	OK	0	2.12502	inf	#NAME?	0.00075	0.00921228	yes
BnaA02g15710D	chrA02:9180847-9181972	Purple	Green	OK	0	2.25821	inf	#NAME?	5e-05	0.000959923	yes
BnaA02g15720D	chrA02:9182533-9183119	Purple	Green	OK	0	140.16	inf	#NAME?	5e-05	0.000959923	yes
BnaA02g15740D	chrA02:9186282-9188197	Purple	Green	OK	0	2.3058	inf	#NAME?	5e-05	0.000959923	yes
BnaA02g15760D	chrA02:9191050-9191374	Purple	Green	OK	0	15.9752	inf	#NAME?	5e-05	0.000959923	yes
BnaA02g15820D	chrA02:9256521-9258451	Purple	Green	OK	0	8.93072	inf	#NAME?	5e-05	0.000959923	yes
BnaA02g15910D	chrA02:9385192-9385825	Purple	Green	OK	5508.52	5.97629	-9.8482	-8.78963	5e-05	0.000959923	yes
BnaA02g15990D	chrA02:9445426-9446792	Purple	Green	OK	0	4.10781	inf	#NAME?	5e-05	0.000959923	yes
BnaA02g16070D	chrA02:9563297-9567536	Purple	Green	OK	0.224037	2.4363	3.44288	3.30053	0.00325	0.0286154	yes
BnaA02g16080D	chrA02:9569754-9573683	Purple	Green	OK	1.32592	21.8908	4.04526	4.98175	5e-05	0.000959923	yes
BnaA02g16100D	chrA02:9575562-9577499	Purple	Green	OK	1.25219	13.5277	3.4334	3.76523	0.0005	0.0066097	yes
BnaA02g16120D	chrA02:9585512-9586079	Purple	Green	OK	0	14.3863	inf	#NAME?	5e-05	0.000959923	yes
BnaA02g16240D	chrA02:9696554-9698004	Purple	Green	OK	0	16.6089	inf	#NAME?	5e-05	0.000959923	yes
BnaA02g16360D	chrA02:9727524-9730595	Purple	Green	OK	0	4.62203	inf	#NAME?	5e-05	0.000959923	yes
BnaA02g16390D	chrA02:9733915-9737007	Purple	Green	OK	0.50418	3.73083	2.88748	3.18918	0.00285	0.0259893	yes
BnaA02g16450D	chrA02:9781648-9783873	Purple	Green	OK	0	8.84085	inf	#NAME?	5e-05	0.000959923	yes
BnaA02g16520D	chrA02:9855331-9858309	Purple	Green	OK	0.319542	3.735	3.54703	3.02399	0.0065	0.0472938	yes
BnaA02g16560D	chrA02:9882731-9883547	Purple	Green	OK	0	3.7487	inf	#NAME?	5e-05	0.000959923	yes
BnaA02g16590D	chrA02:9902782-9903696	Purple	Green	OK	9.56489	107.992	3.49703	5.08254	5e-05	0.000959923	yes
BnaA02g16600D	chrA02:9905448-9907500	Purple	Green	OK	1.61902	7.88575	2.28413	3.02864	0.00075	0.00921228	yes
BnaA02g16610D	chrA02:9908147-9911212	Purple	Green	OK	0	6.51125	inf	#NAME?	5e-05	0.000959923	yes
BnaA02g16680D	chrA02:9965247-9966355	Purple	Green	OK	15.715	47.2493	1.58815	2.65886	0.00075	0.00921228	yes
BnaA02g16740D	chrA02:10000266-10004009	Purple	Green	OK	1.63172	6.0265	1.88492	2.88685	0.0004	0.0055115	yes
BnaA02g16830D	chrA02:10039677-10041168	Purple	Green	OK	0	8.53753	inf	#NAME?	5e-05	0.000959923	yes
BnaA02g17160D	chrA02:10287167-10287428	Purple	Green	OK	0	10.5032	inf	#NAME?	0.00475	0.0379955	yes
BnaA02g17240D	chrA02:10348709-10350239	Purple	Green	OK	0	2.28817	inf	#NAME?	5e-05	0.000959923	yes
BnaA02g17480D	chrA02:10560482-10562205	Purple	Green	OK	25.4294	7.06181	-1.84839	-2.82135	0.0004	0.0055115	yes
BnaA02g17550D	chrA02:10588053-10589263	Purple	Green	OK	37.6194	13.2224	-1.50849	-2.27659	0.00275	0.0252719	yes
BnaA02g17670D	chrA02:10628341-10629969	Purple	Green	OK	48.9372	9.62935	-2.34542	-3.8253	5e-05	0.000959923	yes
BnaA02g17770D	chrA02:10690617-10691333	Purple	Green	OK	0	2.06211	inf	#NAME?	0.00575	0.0433603	yes
BnaA02g17780D	chrA02:10691620-10692400	Purple	Green	OK	92.3424	22.6159	-2.02965	-2.50778	0.0028	0.0256155	yes
BnaA02g18010D	chrA02:10879253-10882233	Purple	Green	OK	7.94857	2.1725	-1.87134	-2.46864	0.0026	0.0242646	yes
BnaA02g18050D	chrA02:10898340-10898922	Purple	Green	OK	36.2986	0	#NAME?	#NAME?	5e-05	0.000959923	yes
BnaA02g18240D	chrA02:11058412-11059960	Purple	Green	OK	5.89693	1.35919	-2.11722	-2.53505	0.00495	0.0388809	yes
BnaA02g18340D	chrA02:11127490-11128290	Purple	Green	OK	47.6895	0	#NAME?	#NAME?	5e-05	0.000959923	yes
BnaA02g18610D	chrA02:11369276-11377374	Purple	Green	OK	0	2.92105	inf	#NAME?	5e-05	0.000959923	yes
BnaA02g18720D	chrA02:11484434-11485370	Purple	Green	OK	22.2902	5.47481	-2.02553	-2.96044	0.0001	0.00178191	yes
BnaA02g18830D	chrA02:11581325-11587106	Purple	Green	OK	8.0345	2.77542	-1.5335	-2.28665	0.0024	0.0227971	yes
BnaA02g18970D	chrA02:11721731-11722656	Purple	Green	OK	210.801	64.1917	-1.71542	-2.87014	0.00025	0.00378451	yes
BnaA02g19000D	chrA02:11745518-11747625	Purple	Green	OK	13.3533	3.81641	-1.80691	-2.52461	0.00155	0.0163505	yes
BnaA02g19070D	chrA02:11768285-11769558	Purple	Green	OK	39.6701	13.9912	-1.50354	-2.05555	0.0059	0.0442101	yes
BnaA02g19190D	chrA02:11910237-11911990	Purple	Green	OK	41.5451	14.5509	-1.51357	-2.34931	0.0026	0.0242646	yes
BnaA02g19210D	chrA02:11928198-11928969	Purple	Green	OK	54.4434	0	#NAME?	#NAME?	5e-05	0.000959923	yes
BnaA02g19510D	chrA02:12108119-12110160	Purple	Green	OK	31.5135	8.76699	-1.84582	-3.0559	5e-05	0.000959923	yes
BnaA02g19550D	chrA02:12122480-12124617	Purple	Green	OK	11.2011	0.910521	-3.6208	-3.89846	0.00035	0.00494884	yes
BnaA02g19650D	chrA02:12199371-12201529	Purple	Green	OK	11.2861	4.22019	-1.41917	-2.03333	0.0062	0.0457984	yes
BnaA02g19770D	chrA02:12253089-12255540	Purple	Green	OK	24.7943	56.4231	1.18627	1.93314	0.0052	0.0403615	yes
BnaA02g20120D	chrA02:12422202-12438897	Purple	Green	OK	6.60634	17.1131	1.37318	2.25562	0.00235	0.022422	yes
BnaA02g20140D	chrA02:12448175-12450489	Purple	Green	OK	13.6783	33.2442	1.28122	2.12738	0.0026	0.0242646	yes
BnaA02g20560D	chrA02:12933402-12939816	Purple	Green	OK	10.9053	24.9593	1.19455	2.02989	0.00505	0.0394701	yes
BnaA02g20570D	chrA02:12940833-12946900	Purple	Green	OK	1.33532	6.28766	2.23534	3.25187	0.00015	0.00250346	yes
BnaA02g20630D	chrA02:12997112-12997484	Purple	Green	OK	94.0748	24.1872	-1.95957	-2.83143	0.0008	0.0096705	yes
BnaA02g20640D	chrA02:13010179-13011001	Purple	Green	OK	21.3422	2.34035	-3.18891	-3.15313	0.0017	0.0174453	yes
BnaA02g20750D	chrA02:13086350-13087297	Purple	Green	OK	3.45424	0	#NAME?	#NAME?	0.0016	0.016684	yes
BnaA02g20810D	chrA02:13120189-13121551	Purple	Green	OK	59.0217	19.4988	-1.59786	-2.64871	0.0003	0.0043708	yes
BnaA02g20820D	chrA02:13124199-13126358	Purple	Green	OK	9.14886	3.24571	-1.49506	-2.29214	0.00395	0.0334531	yes
BnaA02g20870D	chrA02:13196948-13201838	Purple	Green	OK	7.47074	2.29547	-1.70246	-2.64333	0.00085	0.0101314	yes
BnaA02g20890D	chrA02:13225267-13227832	Purple	Green	OK	34.7776	9.79136	-1.82858	-3.06478	0.0001	0.00178191	yes
BnaA02g20950D	chrA02:13273970-13275896	Purple	Green	OK	17.977	2.09538	-3.10087	-3.88884	5e-05	0.000959923	yes
BnaA02g21080D	chrA02:13413841-13414774	Purple	Green	OK	0	2.64445	inf	#NAME?	0.0002	0.00316579	yes
BnaA02g21180D	chrA02:13491856-13495403	Purple	Green	OK	20.4426	3.59729	-2.5066	-3.96651	5e-05	0.000959923	yes
BnaA02g21230D	chrA02:13581672-13582477	Purple	Green	OK	48.8887	10.7223	-2.18889	-2.52195	0.0019	0.0190531	yes
BnaA02g21620D	chrA02:14005686-14008686	Purple	Green	OK	11.1005	3.53716	-1.64996	-2.34546	0.0035	0.0302485	yes
BnaA02g21790D	chrA02:14196904-14197468	Purple	Green	OK	36.8226	88.9822	1.27292	1.94824	0.0047	0.0378012	yes
BnaA02g21810D	chrA02:14223633-14224760	Purple	Green	OK	0	34.2591	inf	#NAME?	0.0008	0.0096705	yes
BnaA02g21830D	chrA02:14231313-14232296	Purple	Green	OK	40.8636	15.6944	-1.38057	-2.28638	0.0018	0.0182563	yes
BnaA02g22480D	chrA02:15022133-15024675	Purple	Green	OK	6.20074	0.723727	-3.09892	-3.21886	0.00215	0.0209639	yes
BnaA02g22550D	chrA02:15093550-15096599	Purple	Green	OK	5.96971	14.9413	1.32357	2.04684	0.0056	0.042583	yes
BnaA02g22810D	chrA02:15331432-15333129	Purple	Green	OK	47.7576	19.284	-1.30833	-2.28162	0.00195	0.0194267	yes
BnaA02g23660D	chrA02:16929844-16930868	Purple	Green	OK	13.5368	42.3696	1.64615	2.44244	0.0013	0.0142051	yes
BnaA02g23810D	chrA02:17104203-17107792	Purple	Green	OK	11.9719	4.48829	-1.41541	-2.39938	0.0012	0.0133692	yes
BnaA02g23870D	chrA02:17164180-17166974	Purple	Green	OK	59.8485	19.2859	-1.63377	-2.78976	0.0002	0.00316579	yes
BnaA02g24030D	chrA02:17350677-17351494	Purple	Green	OK	4.83213	0	#NAME?	#NAME?	0.0003	0.0043708	yes
BnaA02g24640D	chrA02:17970130-17972862	Purple	Green	OK	2.60416	8.79195	1.75537	2.39858	0.0026	0.0242646	yes
BnaA02g24690D	chrA02:17995554-17996533	Purple	Green	OK	13.4613	56.655	2.07338	3.41768	5e-05	0.000959923	yes
BnaA02g24730D	chrA02:18021943-18023143	Purple	Green	OK	0	8.7009	inf	#NAME?	5e-05	0.000959923	yes
BnaA02g24830D	chrA02:18149693-18150421	Purple	Green	OK	0	2.16611	inf	#NAME?	0.0009	0.0105621	yes
BnaA02g24990D	chrA02:18357349-18358927	Purple	Green	OK	14.2278	1.84956	-2.94346	-2.89832	0.005	0.0391798	yes
BnaA02g25010D	chrA02:18386372-18388290	Purple	Green	OK	50.9535	18.2305	-1.48283	-2.53235	0.00045	0.00606143	yes
BnaA02g25030D	chrA02:18390962-18392266	Purple	Green	OK	3.84703	14.7694	1.94079	2.27594	0.0053	0.0409662	yes
BnaA02g25110D	chrA02:18432581-18433274	Purple	Green	OK	13.9662	0	#NAME?	#NAME?	5e-05	0.000959923	yes
BnaA02g25930D	chrA02:18988785-18989095	Purple	Green	OK	53.1321	0	#NAME?	#NAME?	5e-05	0.000959923	yes
BnaA02g26010D	chrA02:19080100-19080723	Purple	Green	OK	3.78917	0	#NAME?	#NAME?	0.00495	0.0388809	yes
BnaA02g26590D	chrA02:19634084-19635187	Purple	Green	OK	9.31884	34.3935	1.88392	2.20426	0.00645	0.0470906	yes
BnaA02g26670D	chrA02:19680292-19681271	Purple	Green	OK	14.8161	54.1368	1.86944	2.9904	5e-05	0.000959923	yes
BnaA02g26910D	chrA02:19843827-19846330	Purple	Green	OK	23.2734	6.49194	-1.84196	-3.00579	0.0001	0.00178191	yes
BnaA02g26940D	chrA02:19881325-19883982	Purple	Green	OK	20.5267	3.59053	-2.51524	-3.88357	5e-05	0.000959923	yes
BnaA02g26980D	chrA02:19919867-19920977	Purple	Green	OK	17.2969	3.15437	-2.45509	-3.0246	0.0023	0.0220633	yes
BnaA02g27170D	chrA02:20054391-20055090	Purple	Green	OK	15.9802	0	#NAME?	#NAME?	5e-05	0.000959923	yes
BnaA02g27550D	chrA02:20295608-20300705	Purple	Green	OK	3.88335	0.329263	-3.55999	-4.06176	0.0005	0.0066097	yes
BnaA02g27670D	chrA02:20432458-20432809	Purple	Green	OK	71.8755	13.5021	-2.41231	-3.03173	0.0011	0.0124635	yes
BnaA02g27860D	chrA02:20574911-20576638	Purple	Green	OK	12.1781	3.88274	-1.64915	-2.50385	0.00085	0.0101314	yes
BnaA02g27890D	chrA02:20589895-20591472	Purple	Green	OK	5.31126	35.2088	2.72881	4.41608	5e-05	0.000959923	yes
BnaA02g28180D	chrA02:20779184-20780911	Purple	Green	OK	15.1959	2.50659	-2.59988	-3.46339	0.00015	0.00250346	yes
BnaA02g28200D	chrA02:20787820-20788409	Purple	Green	OK	192.481	66.1437	-1.54104	-2.18237	0.00385	0.0327296	yes
BnaA02g29380D	chrA02:21478745-21480637	Purple	Green	OK	8.72447	2.37321	-1.87823	-2.56341	0.0007	0.00871608	yes
BnaA02g29490D	chrA02:21541366-21542756	Purple	Green	OK	7.2295	1.26511	-2.51464	-2.58467	0.0046	0.0373418	yes
BnaA02g29670D	chrA02:21616153-21617399	Purple	Green	OK	11.5957	4.11721	-1.49386	-2.33513	0.0056	0.042583	yes
BnaA02g29770D	chrA02:21661328-21662335	Purple	Green	OK	18.8504	3.97893	-2.24414	-3.17862	0.00015	0.00250346	yes
BnaA02g30100D	chrA02:21851358-21853577	Purple	Green	OK	9.0647	3.17192	-1.5149	-2.33986	0.00205	0.0202245	yes
BnaA02g30190D	chrA02:21887551-21888174	Purple	Green	OK	31.9981	7.55126	-2.0832	-2.6871	0.002	0.0198091	yes
BnaA02g30290D	chrA02:21939147-21940313	Purple	Green	OK	0	59.3323	inf	#NAME?	5e-05	0.000959923	yes
BnaA02g30380D	chrA02:21995797-21996668	Purple	Green	OK	12.8373	3.62475	-1.82439	-2.17032	0.0064	0.0468458	yes
BnaA02g30450D	chrA02:22021188-22023112	Purple	Green	OK	7.43411	0	#NAME?	#NAME?	5e-05	0.000959923	yes
BnaA02g30470D	chrA02:22042615-22044836	Purple	Green	OK	35.3143	92.3099	1.38623	2.30821	0.00135	0.0146315	yes
BnaA02g30540D	chrA02:22085460-22092588	Purple	Green	OK	7.88466	17.9908	1.19014	2.02537	0.004	0.0336826	yes
BnaA02g30590D	chrA02:22105325-22111298	Purple	Green	OK	0.351315	2.06871	2.5579	2.83361	0.0021	0.0205893	yes
BnaA02g30910D	chrA02:22301950-22303253	Purple	Green	OK	128.906	47.2729	-1.44724	-2.46196	0.0008	0.0096705	yes
BnaA02g31000D	chrA02:22397982-22399732	Purple	Green	OK	4.0027	0	#NAME?	#NAME?	5e-05	0.000959923	yes
BnaA02g31260D	chrA02:22579563-22580032	Purple	Green	OK	31.9337	0	#NAME?	#NAME?	5e-05	0.000959923	yes
BnaA02g31370D	chrA02:22624115-22626220	Purple	Green	OK	3.13983	11.1696	1.83083	2.47545	0.0031	0.0276948	yes
BnaA02g31600D	chrA02:22789624-22791544	Purple	Green	OK	2.69894	0	#NAME?	#NAME?	5e-05	0.000959923	yes
BnaA02g31620D	chrA02:22801820-22809201	Purple	Green	OK	15.8347	5.16315	-1.61677	-2.71761	0.0002	0.00316579	yes
BnaA02g31630D	chrA02:22810888-22812679	Purple	Green	OK	19.4884	2.82055	-2.78857	-3.19382	0.00335	0.0292424	yes
BnaA02g31980D	chrA02:23032462-23034656	Purple	Green	OK	7.78191	23.997	1.62465	2.57823	0.0009	0.0105621	yes
BnaA02g32040D	chrA02:23076764-23077148	Purple	Green	OK	11.5046	0	#NAME?	#NAME?	5e-05	0.000959923	yes
BnaA02g32060D	chrA02:23094252-23096223	Purple	Green	OK	22.6082	5.70552	-1.98642	-3.03239	0.0001	0.00178191	yes
BnaA02g32100D	chrA02:23107503-23107881	Purple	Green	OK	96.4398	18.3733	-2.39202	-3.32738	0.00025	0.00378451	yes
BnaA02g32110D	chrA02:23108949-23110959	Purple	Green	OK	9.13254	2.7852	-1.71324	-2.30967	0.00325	0.0286154	yes
BnaA02g32260D	chrA02:23199063-23199771	Purple	Green	OK	5.56075	0	#NAME?	#NAME?	0.0004	0.0055115	yes
BnaA02g32290D	chrA02:23226570-23227290	Purple	Green	OK	60.4602	21.373	-1.50019	-2.508	0.0008	0.0096705	yes
BnaA02g32350D	chrA02:23271793-23273053	Purple	Green	OK	0	11.0425	inf	#NAME?	5e-05	0.000959923	yes
BnaA02g32460D	chrA02:23336771-23344590	Purple	Green	OK	90.9369	12.0926	-2.91074	-4.65628	5e-05	0.000959923	yes
BnaA02g32530D	chrA02:23401738-23403070	Purple	Green	OK	14.4353	5.34266	-1.43397	-2.12116	0.0064	0.0468458	yes
BnaA02g32610D	chrA02:23449881-23450420	Purple	Green	OK	10.8604	0	#NAME?	#NAME?	5e-05	0.000959923	yes
BnaA02g32650D	chrA02:23473816-23474250	Purple	Green	OK	0	3.1699	inf	#NAME?	0.00575	0.0433603	yes
BnaA02g32700D	chrA02:23485883-23488724	Purple	Green	OK	0	7.01022	inf	#NAME?	5e-05	0.000959923	yes
BnaA02g33090D	chrA02:23689994-23693745	Purple	Green	OK	3.01982	10.0261	1.73122	2.72111	0.00045	0.00606143	yes
BnaA02g33370D	chrA02:23915475-23916081	Purple	Green	OK	148.226	341.645	1.2047	1.97123	0.00645	0.0470906	yes
BnaA02g33520D	chrA02:24041126-24044684	Purple	Green	OK	33.1995	7.82126	-2.08569	-3.5469	5e-05	0.000959923	yes
BnaA02g33610D	chrA02:24106193-24108719	Purple	Green	OK	20.2033	8.12724	-1.31375	-2.19351	0.00225	0.0216665	yes
BnaA02g33940D	chrA02:24285685-24288987	Purple	Green	OK	1.52119	16.581	3.44625	4.3814	5e-05	0.000959923	yes
BnaA02g34200D	chrA02:24432238-24436331	Purple	Green	OK	11.7949	2.33041	-2.33951	-3.474	5e-05	0.000959923	yes
BnaA02g34420D	chrA02:24547545-24550520	Purple	Green	OK	29.472	117.542	1.99576	3.13055	5e-05	0.000959923	yes
BnaA02g34610D	chrA02:24657668-24658881	Purple	Green	OK	0	2.3206	inf	#NAME?	0.00025	0.00378451	yes
BnaA02g34700D	chrA02:24719496-24720135	Purple	Green	OK	0	23.8461	inf	#NAME?	5e-05	0.000959923	yes
BnaA02g34760D	chrA02:24745375-24746758	Purple	Green	OK	1.3709	1023.06	9.54356	9.29288	0.00025	0.00378451	yes
BnaA02g34780D	chrA02:24752052-24752922	Purple	Green	OK	0	10.1769	inf	#NAME?	5e-05	0.000959923	yes
BnaA02g34790D	chrA02:24753673-24755427	Purple	Green	OK	0	7.47493	inf	#NAME?	5e-05	0.000959923	yes
BnaA02g34810D	chrA02:24759839-24761735	Purple	Green	OK	0	17.1988	inf	#NAME?	5e-05	0.000959923	yes
BnaA02g34820D	chrA02:24762609-24764526	Purple	Green	OK	0	5.34183	inf	#NAME?	5e-05	0.000959923	yes
BnaA02g34840D	chrA02:24766984-24768819	Purple	Green	OK	0	10.7634	inf	#NAME?	5e-05	0.000959923	yes
BnaA02g34910D	chrA02:24791399-24792133	Purple	Green	OK	0	20.7024	inf	#NAME?	5e-05	0.000959923	yes
BnaA02g34960D	chrA02_random:15523-16678	Purple	Green	OK	29.7484	3.6621	-3.02207	-3.33948	0.00035	0.00494884	yes
BnaA02g34970D	chrA02_random:17178-18352	Purple	Green	OK	11.9676	1.57329	-2.92728	-2.71404	0.0063	0.0463525	yes
BnaA02g35010D	chrA02_random:30866-34465	Purple	Green	OK	14.8998	3.6858	-2.01524	-3.10427	5e-05	0.000959923	yes
BnaA02g35020D	chrA02_random:36112-38063	Purple	Green	OK	19.6331	4.04922	-2.27757	-2.904	0.00045	0.00606143	yes
BnaA02g35040D	chrA02_random:41878-42920	Purple	Green	OK	27.8209	4.20571	-2.72575	-3.07738	0.00125	0.0138073	yes
BnaA02g35050D	chrA02_random:44701-45976	Purple	Green	OK	0	16.1568	inf	#NAME?	5e-05	0.000959923	yes
BnaA02g35270D	chrA02_random:165511-168214	Purple	Green	OK	43.6704	19.7442	-1.14523	-1.95257	0.0069	0.0493788	yes
BnaA02g35550D	chrA02_random:356376-356880	Purple	Green	OK	0	12.4701	inf	#NAME?	5e-05	0.000959923	yes
BnaA02g35610D	chrA02_random:382692-383840	Purple	Green	OK	0	10.6522	inf	#NAME?	5e-05	0.000959923	yes
BnaA02g35670D	chrA02_random:443339-444516	Purple	Green	OK	25.5957	86.5293	1.75729	2.96472	0.00035	0.00494884	yes
BnaA02g35750D	chrA02_random:512899-514481	Purple	Green	OK	3.08669	0	#NAME?	#NAME?	5e-05	0.000959923	yes
BnaA02g35780D	chrA02_random:527962-529678	Purple	Green	OK	8.36857	1.81416	-2.20568	-2.90617	0.00045	0.00606143	yes
BnaA02g35890D	chrA02_random:601605-601977	Purple	Green	OK	0	9.11782	inf	#NAME?	5e-05	0.000959923	yes
BnaA02g36020D	chrA02_random:659863-661497	Purple	Green	OK	2.00773	9.54428	2.24907	2.70446	0.0028	0.0256155	yes
BnaA02g36400D	chrA02_random:923164-927000	Purple	Green	OK	14.9458	2.51938	-2.5686	-3.47561	0.00025	0.00378451	yes
BnaA02g36560D	chrA02_random:1042154-1042562	Purple	Green	OK	5.5914	0	#NAME?	#NAME?	0.0001	0.00178191	yes
BnaA02g36610D	chrA02_random:1132827-1134218	Purple	Green	OK	20.1679	5.58049	-1.8536	-2.5515	0.0009	0.0105621	yes
BnaA02g36710D	chrA02_random:1311960-1312630	Purple	Green	OK	4.16414	0	#NAME?	#NAME?	5e-05	0.000959923	yes
BnaA02g36740D	chrA02_random:1353451-1358999	Purple	Green	OK	4.63831	0.516479	-3.16682	-3.66	0.0004	0.0055115	yes
BnaA02g36790D	chrA02_random:1406804-1415110	Purple	Green	OK	46.9337	17.5931	-1.41561	-2.4007	0.0003	0.0043708	yes
BnaA02g37010D	chrA02_random:1536205-1537938	Purple	Green	OK	7.15107	17.4653	1.28826	2.06249	0.00645	0.0470906	yes
BnaA03g00260D	chrA03:103186-104588	Purple	Green	OK	218.872	59.1843	-1.8868	-2.39533	0.0012	0.0133692	yes
BnaA03g00380D	chrA03:134513-135443	Purple	Green	OK	46.5366	18.7041	-1.31501	-2.19313	0.00275	0.0252719	yes
BnaA03g00720D	chrA03:309822-310401	Purple	Green	OK	127.046	446.458	1.81317	3.02305	0.0001	0.00178191	yes
BnaA03g00820D	chrA03:352521-354209	Purple	Green	OK	19.5913	4.26464	-2.19971	-3.27046	5e-05	0.000959923	yes
BnaA03g00850D	chrA03:367400-370156	Purple	Green	OK	7.87367	3.19833	-1.29972	-2.05876	0.0051	0.0397662	yes
BnaA03g00860D	chrA03:370286-371906	Purple	Green	OK	5.44936	19.8677	1.86627	2.46122	0.0017	0.0174453	yes
BnaA03g00920D	chrA03:395362-396920	Purple	Green	OK	73.2013	32.167	-1.18629	-2.02773	0.00675	0.0485661	yes
BnaA03g00990D	chrA03:417273-419736	Purple	Green	OK	4.09027	13.8795	1.76269	2.63392	0.00095	0.0110606	yes
BnaA03g01080D	chrA03:521409-521604	Purple	Green	OK	380.378	0	#NAME?	#NAME?	5e-05	0.000959923	yes
BnaA03g01120D	chrA03:541656-543954	Purple	Green	OK	24.9963	1.39102	-4.1675	-4.34406	0.0006	0.00768631	yes
BnaA03g01410D	chrA03:648641-649454	Purple	Green	OK	334.491	141.485	-1.24132	-1.99902	0.00685	0.0491199	yes
BnaA03g01470D	chrA03:667101-668409	Purple	Green	OK	10.5913	0	#NAME?	#NAME?	5e-05	0.000959923	yes
BnaA03g01480D	chrA03:669845-671017	Purple	Green	OK	9.59042	25.2169	1.39473	2.24965	0.0052	0.0403615	yes
BnaA03g01510D	chrA03:679427-680575	Purple	Green	OK	9.54605	2.12052	-2.17048	-3.12737	0.0007	0.00871608	yes
BnaA03g01650D	chrA03:802240-804662	Purple	Green	OK	14.8052	0.90502	-4.03201	-3.97479	0.00065	0.00821581	yes
BnaA03g01740D	chrA03:821349-824200	Purple	Green	OK	25.7113	59.4233	1.20863	2.0545	0.00455	0.0370417	yes
BnaA03g01900D	chrA03:870521-872277	Purple	Green	OK	4.9581	15.1249	1.60906	2.39595	0.00155	0.0163505	yes
BnaA03g01910D	chrA03:872669-874271	Purple	Green	OK	15.8348	36.2585	1.19522	2.06399	0.0041	0.0343079	yes
BnaA03g01940D	chrA03:882510-889841	Purple	Green	OK	9.20824	22.2449	1.27248	2.18674	0.0028	0.0256155	yes
BnaA03g02300D	chrA03:1055345-1058063	Purple	Green	OK	2.32489	12.5644	2.4341	3.42107	0.00015	0.00250346	yes
BnaA03g02320D	chrA03:1059586-1060127	Purple	Green	OK	90.6543	210.883	1.21799	2.08541	0.004	0.0336826	yes
BnaA03g02470D	chrA03:1123270-1123975	Purple	Green	OK	3.25181	25.6913	2.98196	3.1972	0.0016	0.016684	yes
BnaA03g02570D	chrA03:1218137-1220528	Purple	Green	OK	2.68245	10.8611	2.01755	2.68113	0.00165	0.0170553	yes
BnaA03g02610D	chrA03:1233599-1235851	Purple	Green	OK	0	5.18713	inf	#NAME?	5e-05	0.000959923	yes
BnaA03g02730D	chrA03:1315399-1318612	Purple	Green	OK	0.649966	9.47587	3.86582	3.38842	0.00125	0.0138073	yes
BnaA03g02740D	chrA03:1323577-1326978	Purple	Green	OK	4.11976	10.8182	1.39284	2.32423	0.00125	0.0138073	yes
BnaA03g02760D	chrA03:1334660-1336500	Purple	Green	OK	10.0708	24.4928	1.28217	1.96094	0.0067	0.0483123	yes
BnaA03g02770D	chrA03:1336820-1338793	Purple	Green	OK	3.66996	12.848	1.80771	2.82897	0.0004	0.0055115	yes
BnaA03g02800D	chrA03:1356344-1357470	Purple	Green	OK	7.22297	28.8178	1.9963	3.08014	0.00025	0.00378451	yes
BnaA03g02820D	chrA03:1361324-1364246	Purple	Green	OK	9.69123	64.6125	2.73706	4.03154	5e-05	0.000959923	yes
BnaA03g02840D	chrA03:1370557-1373496	Purple	Green	OK	9.25966	79.4188	3.10045	4.94348	5e-05	0.000959923	yes
BnaA03g02850D	chrA03:1376253-1377875	Purple	Green	OK	2.00274	12.9888	2.69722	2.68717	0.007	0.0498936	yes
BnaA03g02880D	chrA03:1388878-1394401	Purple	Green	OK	0.711937	3.5819	2.3309	3.40581	5e-05	0.000959923	yes
BnaA03g02890D	chrA03:1395082-1395493	Purple	Green	OK	19.2913	108.726	2.49467	2.91698	0.00125	0.0138073	yes
BnaA03g02930D	chrA03:1413467-1414931	Purple	Green	OK	19.7043	60.7838	1.62518	2.7254	0.0006	0.00768631	yes
BnaA03g02940D	chrA03:1415994-1422184	Purple	Green	OK	6.38966	50.3433	2.97799	4.85087	5e-05	0.000959923	yes
BnaA03g02950D	chrA03:1422802-1424548	Purple	Green	OK	6.6164	123.406	4.22122	6.04284	5e-05	0.000959923	yes
BnaA03g02960D	chrA03:1428995-1429559	Purple	Green	OK	0	3.55859	inf	#NAME?	0.0009	0.0105621	yes
BnaA03g02970D	chrA03:1430483-1433698	Purple	Green	OK	3.73566	12.9563	1.79421	2.86596	0.0001	0.00178191	yes
BnaA03g03010D	chrA03:1456054-1459764	Purple	Green	OK	0.655099	11.0509	4.07631	4.61716	0.00025	0.00378451	yes
BnaA03g03190D	chrA03:1539934-1542354	Purple	Green	OK	17.5159	7.10461	-1.30184	-2.00302	0.00645	0.0470906	yes
BnaA03g03200D	chrA03:1551480-1551930	Purple	Green	OK	74.2849	6.53306	-3.50724	-4.21816	5e-05	0.000959923	yes
BnaA03g03360D	chrA03:1619955-1622144	Purple	Green	OK	3.96945	16.6417	2.06779	2.86091	0.00045	0.00606143	yes
BnaA03g03440D	chrA03:1664597-1668070	Purple	Green	OK	93.8879	22.9339	-2.03346	-3.34213	5e-05	0.000959923	yes
BnaA03g03900D	chrA03:1820148-1823563	Purple	Green	OK	0.914968	8.32928	3.1864	3.74388	0.0005	0.0066097	yes
BnaA03g04090D	chrA03:1910143-1913990	Purple	Green	OK	5.07581	12.6675	1.31942	2.11038	0.00305	0.0273685	yes
BnaA03g04200D	chrA03:1944807-1946438	Purple	Green	OK	56.1493	153.574	1.45159	2.36313	0.00115	0.0129406	yes
BnaA03g04370D	chrA03:2043522-2044828	Purple	Green	OK	27.9533	73.8933	1.40243	2.43387	0.0006	0.00768631	yes
BnaA03g04380D	chrA03:2046292-2048446	Purple	Green	OK	1.82527	7.6994	2.07663	2.33094	0.0055	0.0420248	yes
BnaA03g04440D	chrA03:2074922-2080271	Purple	Green	OK	39.0189	197.618	2.34047	3.01942	0.00015	0.00250346	yes
BnaA03g04670D	chrA03:2176355-2177814	Purple	Green	OK	44.358	8.75638	-2.34079	-3.29638	0.0001	0.00178191	yes
BnaA03g04730D	chrA03:2206403-2209147	Purple	Green	OK	4.31469	0.855227	-2.33488	-2.51849	0.0047	0.0378012	yes
BnaA03g04770D	chrA03:2216494-2219377	Purple	Green	OK	5.2365	1.26354	-2.05113	-2.70885	0.00135	0.0146315	yes
BnaA03g05130D	chrA03:2349270-2351301	Purple	Green	OK	26.1593	11.1088	-1.23562	-2.0959	0.00375	0.0320327	yes
BnaA03g05790D	chrA03:2633892-2637372	Purple	Green	OK	13.839	5.92916	-1.22284	-2.02697	0.0055	0.0420248	yes
BnaA03g05810D	chrA03:2645417-2647622	Purple	Green	OK	73.9469	16.9307	-2.12685	-3.44355	5e-05	0.000959923	yes
BnaA03g05870D	chrA03:2675292-2678322	Purple	Green	OK	5.46892	1.34999	-2.01831	-2.41894	0.00325	0.0286154	yes
BnaA03g05890D	chrA03:2685412-2685958	Purple	Green	OK	43.7299	138.404	1.66219	2.92787	0.00065	0.00821581	yes
BnaA03g05920D	chrA03:2700904-2704841	Purple	Green	OK	2.84506	7.35793	1.37084	2.24531	0.0018	0.0182563	yes
BnaA03g05930D	chrA03:2705070-2706405	Purple	Green	OK	11.0903	47.5249	2.09938	3.44523	5e-05	0.000959923	yes
BnaA03g05950D	chrA03:2709083-2710168	Purple	Green	OK	19.8149	52.5157	1.40616	2.36404	0.0017	0.0174453	yes
BnaA03g06050D	chrA03:2734816-2735137	Purple	Green	OK	0	10.5119	inf	#NAME?	5e-05	0.000959923	yes
BnaA03g06360D	chrA03:2845005-2845854	Purple	Green	OK	0	7.33487	inf	#NAME?	5e-05	0.000959923	yes
BnaA03g06830D	chrA03:3045235-3045529	Purple	Green	OK	9.50873	0	#NAME?	#NAME?	0.00045	0.00606143	yes
BnaA03g06890D	chrA03:3053927-3055293	Purple	Green	OK	30.1613	2.06171	-3.87079	-3.94223	0.0011	0.0124635	yes
BnaA03g07140D	chrA03:3160460-3162808	Purple	Green	OK	6.20224	1.17199	-2.40383	-2.78534	0.00205	0.0202245	yes
BnaA03g07150D	chrA03:3164763-3166637	Purple	Green	OK	19.1724	4.76662	-2.00799	-3.17573	0.0001	0.00178191	yes
BnaA03g07240D	chrA03:3214062-3216446	Purple	Green	OK	9.74226	0.775546	-3.65097	-3.89368	0.00095	0.0110606	yes
BnaA03g07890D	chrA03:3526323-3527047	Purple	Green	OK	0	18.9952	inf	#NAME?	5e-05	0.000959923	yes
BnaA03g07930D	chrA03:3535896-3536766	Purple	Green	OK	5.66203	72.8816	3.68616	4.58297	5e-05	0.000959923	yes
BnaA03g07970D	chrA03:3545592-3548455	Purple	Green	OK	2.28796	7.28371	1.67061	2.42033	0.0012	0.0133692	yes
BnaA03g07980D	chrA03:3548987-3549414	Purple	Green	OK	0	21.2728	inf	#NAME?	5e-05	0.000959923	yes
BnaA03g08080D	chrA03:3643616-3644192	Purple	Green	OK	4.06581	27.3741	2.7512	3.16545	0.0007	0.00871608	yes
BnaA03g08200D	chrA03:3717035-3721262	Purple	Green	OK	6.22106	1.1609	-2.42192	-3.12991	0.00025	0.00378451	yes
BnaA03g08360D	chrA03:3776119-3778099	Purple	Green	OK	27.7896	8.04052	-1.78918	-2.85568	0.00025	0.00378451	yes
BnaA03g08540D	chrA03:3865967-3867296	Purple	Green	OK	23.2189	174.995	2.91394	4.7346	5e-05	0.000959923	yes
BnaA03g08650D	chrA03:3920160-3924999	Purple	Green	OK	1.13344	5.96957	2.39692	3.35554	0.0001	0.00178191	yes
BnaA03g08660D	chrA03:3927051-3932642	Purple	Green	OK	2.0658	5.12375	1.3105	2.17747	0.0034	0.0295699	yes
BnaA03g08750D	chrA03:3971204-3972506	Purple	Green	OK	6.89487	27.9733	2.02045	2.9791	0.001	0.0115482	yes
BnaA03g09130D	chrA03:4113088-4113607	Purple	Green	OK	0	11.8704	inf	#NAME?	5e-05	0.000959923	yes
BnaA03g09170D	chrA03:4129419-4129845	Purple	Green	OK	114.366	312.108	1.44839	2.3504	0.0013	0.0142051	yes
BnaA03g09180D	chrA03:4131113-4132271	Purple	Green	OK	47.5146	16.6225	-1.51524	-2.396	0.0016	0.016684	yes
BnaA03g09190D	chrA03:4133714-4134360	Purple	Green	OK	93.255	9.54718	-3.28803	-4.41482	5e-05	0.000959923	yes
BnaA03g09330D	chrA03:4189836-4191083	Purple	Green	OK	9.40458	2.27141	-2.04978	-2.34553	0.00495	0.0388809	yes
BnaA03g09340D	chrA03:4192499-4195946	Purple	Green	OK	6.0456	1.12491	-2.42607	-2.92314	0.00105	0.0120086	yes
BnaA03g09480D	chrA03:4254275-4255717	Purple	Green	OK	2.79067	18.8262	2.75406	3.4886	0.0003	0.0043708	yes
BnaA03g09550D	chrA03:4277058-4277464	Purple	Green	OK	5.72116	0	#NAME?	#NAME?	0.0022	0.0212956	yes
BnaA03g09830D	chrA03:4440955-4442968	Purple	Green	OK	15.3351	35.3508	1.20491	2.03461	0.0055	0.0420248	yes
BnaA03g09840D	chrA03:4444203-4448058	Purple	Green	OK	5.31135	14.5193	1.45082	2.39185	0.0013	0.0142051	yes
BnaA03g09890D	chrA03:4462250-4464572	Purple	Green	OK	2.22831	6.7285	1.59433	2.32502	0.00295	0.0266619	yes
BnaA03g10070D	chrA03:4512765-4517344	Purple	Green	OK	11.1365	0.472458	-4.55897	-4.27212	0.00225	0.0216665	yes
BnaA03g10140D	chrA03:4543916-4545705	Purple	Green	OK	6.81373	1.65682	-2.04003	-2.35559	0.00695	0.049645	yes
BnaA03g10190D	chrA03:4578057-4579805	Purple	Green	OK	3.44465	9.57653	1.47515	2.09036	0.0064	0.0468458	yes
BnaA03g10530D	chrA03:4743394-4744362	Purple	Green	OK	4.58283	0	#NAME?	#NAME?	5e-05	0.000959923	yes
BnaA03g10670D	chrA03:4812748-4813441	Purple	Green	OK	325.049	726.287	1.15988	2.03122	0.00495	0.0388809	yes
BnaA03g11100D	chrA03:4991076-4992647	Purple	Green	OK	11.8084	97.1145	3.03988	5.01442	5e-05	0.000959923	yes
BnaA03g11110D	chrA03:4992784-4993411	Purple	Green	OK	40.8184	119.196	1.54605	2.64628	0.00065	0.00821581	yes
BnaA03g11140D	chrA03:5008459-5010047	Purple	Green	OK	18.9749	84.6952	2.15819	3.63985	5e-05	0.000959923	yes
BnaA03g11150D	chrA03:5010184-5010811	Purple	Green	OK	21.3025	61.7319	1.53499	2.32983	0.00175	0.0178682	yes
BnaA03g11180D	chrA03:5022904-5024924	Purple	Green	OK	4.12956	1.40092	-1.55961	-2.34789	0.0055	0.0420248	yes
BnaA03g11520D	chrA03:5162462-5164074	Purple	Green	OK	8.05625	21.0645	1.38663	2.20517	0.0033	0.0289006	yes
BnaA03g12490D	chrA03:5701112-5705345	Purple	Green	OK	12.257	4.18766	-1.54939	-2.63466	0.00085	0.0101314	yes
BnaA03g12890D	chrA03:5870715-5871075	Purple	Green	OK	0	3.63198	inf	#NAME?	0.006	0.0447159	yes
BnaA03g13040D	chrA03:5930443-5939596	Purple	Green	OK	0.787926	4.21139	2.41817	3.22804	0.00055	0.00713795	yes
BnaA03g13060D	chrA03:5946061-5946703	Purple	Green	OK	16.7281	3.13917	-2.41382	-2.6939	0.0063	0.0463525	yes
BnaA03g13140D	chrA03:5966874-5967207	Purple	Green	OK	5.56453	0	#NAME?	#NAME?	0.00085	0.0101314	yes
BnaA03g13590D	chrA03:6207123-6210871	Purple	Green	OK	4.46681	19.9692	2.16046	3.04135	0.0001	0.00178191	yes
BnaA03g14000D	chrA03:6409580-6411877	Purple	Green	OK	4.73496	0.426229	-3.47365	-2.95879	0.00615	0.0455158	yes
BnaA03g14010D	chrA03:6412404-6414269	Purple	Green	OK	4.01549	10.3953	1.37228	2.13978	0.00455	0.0370417	yes
BnaA03g14150D	chrA03:6498453-6499583	Purple	Green	OK	180.729	71.9789	-1.32818	-2.3127	0.00225	0.0216665	yes
BnaA03g14300D	chrA03:6563885-6567981	Purple	Green	OK	13.3925	3.21612	-2.05803	-2.8012	0.0005	0.0066097	yes
BnaA03g14370D	chrA03:6606340-6608493	Purple	Green	OK	2.98488	8.35507	1.48498	2.11103	0.0043	0.035563	yes
BnaA03g14720D	chrA03:6763319-6767247	Purple	Green	OK	7.33986	1.61403	-2.18509	-2.74093	0.00145	0.0154949	yes
BnaA03g14760D	chrA03:6784194-6786132	Purple	Green	OK	10.679	1.92564	-2.47137	-3.55292	5e-05	0.000959923	yes
BnaA03g14980D	chrA03:6910115-6913570	Purple	Green	OK	10.0569	23.2894	1.21148	2.09699	0.00395	0.0334531	yes
BnaA03g15610D	chrA03:7219028-7219562	Purple	Green	OK	599.708	47.8485	-3.64771	-5.62591	5e-05	0.000959923	yes
BnaA03g15740D	chrA03:7285163-7285957	Purple	Green	OK	5.18416	0	#NAME?	#NAME?	5e-05	0.000959923	yes
BnaA03g15830D	chrA03:7333238-7334039	Purple	Green	OK	82.2904	290.259	1.81854	2.75945	0.00015	0.00250346	yes
BnaA03g16370D	chrA03:7643131-7645097	Purple	Green	OK	20.978	9.18535	-1.19147	-1.99309	0.0058	0.0436448	yes
BnaA03g17380D	chrA03:8157090-8159121	Purple	Green	OK	8.42627	2.84306	-1.56745	-2.26837	0.0034	0.0295699	yes
BnaA03g18070D	chrA03:8495907-8497930	Purple	Green	OK	8.52483	0.980354	-3.1203	-2.94535	0.00525	0.0406461	yes
BnaA03g18330D	chrA03:8595471-8610924	Purple	Green	OK	1.37505	3.50924	1.35167	2.31301	0.00185	0.0186879	yes
BnaA03g18540D	chrA03:8726069-8728057	Purple	Green	OK	539.131	1.00471	-9.06772	-9.11339	5e-05	0.000959923	yes
BnaA03g18570D	chrA03:8732437-8734897	Purple	Green	OK	5.06424	0.63118	-3.00422	-3.56304	0.00045	0.00606143	yes
BnaA03g19060D	chrA03:9016394-9022498	Purple	Green	OK	6.28277	0.973347	-2.69038	-3.11287	0.0014	0.0150511	yes
BnaA03g19190D	chrA03:9071015-9072579	Purple	Green	OK	11.2628	1.20026	-3.23015	-3.45276	0.0012	0.0133692	yes
BnaA03g19720D	chrA03:9348014-9349624	Purple	Green	OK	19.1922	4.84984	-1.98451	-2.86418	0.0008	0.0096705	yes
BnaA03g19790D	chrA03:9400275-9400476	Purple	Green	OK	20.5013	0	#NAME?	#NAME?	0.0022	0.0212956	yes
BnaA03g19880D	chrA03:9456737-9458855	Purple	Green	OK	17.9723	3.89345	-2.20665	-3.34771	0.00015	0.00250346	yes
BnaA03g20290D	chrA03:9648198-9649318	Purple	Green	OK	28.5441	6.92039	-2.04427	-2.9635	5e-05	0.000959923	yes
BnaA03g20310D	chrA03:9663563-9664876	Purple	Green	OK	26.744	6.43426	-2.05537	-2.71579	0.0017	0.0174453	yes
BnaA03g20360D	chrA03:9702574-9706091	Purple	Green	OK	8.5265	20.8176	1.28778	2.29101	0.0029	0.0263271	yes
BnaA03g20600D	chrA03:9779212-9780578	Purple	Green	OK	20.75	49.3707	1.25054	2.05939	0.00505	0.0394701	yes
BnaA03g20620D	chrA03:9781841-9782384	Purple	Green	OK	3.80537	24.045	2.65963	2.95384	0.00355	0.0305691	yes
BnaA03g20840D	chrA03:9872876-9873265	Purple	Green	OK	79.8411	17.4829	-2.19119	-2.38161	0.00565	0.0428562	yes
BnaA03g20870D	chrA03:9880500-9881355	Purple	Green	OK	18.8376	1.84763	-3.34987	-2.94992	0.00685	0.0491199	yes
BnaA03g21240D	chrA03:10097149-10098261	Purple	Green	OK	39.2926	10.608	-1.88911	-2.70316	0.0008	0.0096705	yes
BnaA03g21490D	chrA03:10189592-10191433	Purple	Green	OK	3.01686	12.0897	2.00266	2.76364	0.0003	0.0043708	yes
BnaA03g21570D	chrA03:10223730-10225727	Purple	Green	OK	0	3.12724	inf	#NAME?	5e-05	0.000959923	yes
BnaA03g21720D	chrA03:10273466-10273682	Purple	Green	OK	205.511	0	#NAME?	#NAME?	0.00495	0.0388809	yes
BnaA03g21850D	chrA03:10337429-10341339	Purple	Green	OK	8.81179	46.7663	2.40796	4.00042	5e-05	0.000959923	yes
BnaA03g21970D	chrA03:10398675-10399434	Purple	Green	OK	9.69874	63.0413	2.70043	4.15863	5e-05	0.000959923	yes
BnaA03g21990D	chrA03:10406182-10407345	Purple	Green	OK	42.1699	8.59645	-2.2944	-3.48666	5e-05	0.000959923	yes
BnaA03g22000D	chrA03:10409328-10410482	Purple	Green	OK	33.4763	10.9986	-1.60582	-2.49813	0.00105	0.0120086	yes
BnaA03g22250D	chrA03:10560538-10561344	Purple	Green	OK	4.60186	0	#NAME?	#NAME?	0.00015	0.00250346	yes
BnaA03g22850D	chrA03:10873215-10875536	Purple	Green	OK	2.62299	7.97648	1.60454	2.21139	0.00375	0.0320327	yes
BnaA03g23070D	chrA03:10995776-10996880	Purple	Green	OK	17.9943	1.78062	-3.33709	-3.31447	0.00215	0.0209639	yes
BnaA03g23160D	chrA03:11046695-11048630	Purple	Green	OK	3.67853	13.1462	1.83744	2.53148	0.0012	0.0133692	yes
BnaA03g23220D	chrA03:11072088-11076452	Purple	Green	OK	29.2529	10.6246	-1.46117	-2.44769	0.0013	0.0142051	yes
BnaA03g23230D	chrA03:11077942-11083925	Purple	Green	OK	41.7716	11.7376	-1.83138	-3.05783	5e-05	0.000959923	yes
BnaA03g23800D	chrA03:11411549-11413066	Purple	Green	OK	13.9019	5.08701	-1.45039	-2.07315	0.00505	0.0394701	yes
BnaA03g23810D	chrA03:11419592-11420528	Purple	Green	OK	212.532	8.88923	-4.57948	-6.86249	5e-05	0.000959923	yes
BnaA03g23870D	chrA03:11444063-11444550	Purple	Green	OK	15.4163	101.698	2.72177	2.9731	0.0016	0.016684	yes
BnaA03g23880D	chrA03:11450896-11455054	Purple	Green	OK	56.0406	19.7518	-1.50449	-2.45662	0.00045	0.00606143	yes
BnaA03g24030D	chrA03:11533627-11535979	Purple	Green	OK	27.0391	8.14284	-1.73144	-2.86509	5e-05	0.000959923	yes
BnaA03g24310D	chrA03:11678582-11680816	Purple	Green	OK	41.0849	116.609	1.505	2.45446	0.00145	0.0154949	yes
BnaA03g24350D	chrA03:11703183-11704457	Purple	Green	OK	126.387	315.091	1.31793	2.04625	0.00495	0.0388809	yes
BnaA03g24520D	chrA03:11804147-11809415	Purple	Green	OK	58.5704	23.2219	-1.33468	-1.99414	0.0044	0.03611	yes
BnaA03g24580D	chrA03:11832396-11833065	Purple	Green	OK	1383.29	28.336	-5.60932	-5.94491	5e-05	0.000959923	yes
BnaA03g24720D	chrA03:11929679-11930923	Purple	Green	OK	12.7731	36.0528	1.497	2.39277	0.00155	0.0163505	yes
BnaA03g25050D	chrA03:12083222-12085218	Purple	Green	OK	0.854873	11.2018	3.71188	4.18144	0.0004	0.0055115	yes
BnaA03g25150D	chrA03:12162333-12162735	Purple	Green	OK	12.5728	0	#NAME?	#NAME?	5e-05	0.000959923	yes
BnaA03g25300D	chrA03:12226369-12228011	Purple	Green	OK	3.96051	15.3283	1.95244	2.51629	0.0016	0.016684	yes
BnaA03g25760D	chrA03:12555451-12556608	Purple	Green	OK	425.216	141.706	-1.58529	-2.41364	0.0006	0.00768631	yes
BnaA03g25790D	chrA03:12562073-12564613	Purple	Green	OK	13.462	4.33514	-1.63475	-2.58503	0.00025	0.00378451	yes
BnaA03g25820D	chrA03:12573650-12575699	Purple	Green	OK	2.52355	8.38336	1.73208	2.41151	0.0032	0.028339	yes
BnaA03g25870D	chrA03:12597967-12599565	Purple	Green	OK	3.49495	0	#NAME?	#NAME?	5e-05	0.000959923	yes
BnaA03g25880D	chrA03:12631111-12633485	Purple	Green	OK	5.6069	1.33547	-2.06986	-2.46118	0.00415	0.0346516	yes
BnaA03g26410D	chrA03:12926853-12930489	Purple	Green	OK	4.99673	17.4977	1.80811	2.38296	0.00305	0.0273685	yes
BnaA03g26470D	chrA03:12964791-12966315	Purple	Green	OK	42.3249	109.211	1.36754	2.35383	0.00125	0.0138073	yes
BnaA03g26700D	chrA03:13117103-13117836	Purple	Green	OK	209.037	67.468	-1.63149	-2.50505	0.00065	0.00821581	yes
BnaA03g26770D	chrA03:13167897-13169655	Purple	Green	OK	12.3689	2.48968	-2.31269	-3.17139	0.0003	0.0043708	yes
BnaA03g26780D	chrA03:13180556-13184496	Purple	Green	OK	5.65504	0.769308	-2.8779	-3.39331	0.0004	0.0055115	yes
BnaA03g27090D	chrA03:13366387-13369775	Purple	Green	OK	8.57107	1.30146	-2.71935	-3.07431	0.00195	0.0194267	yes
BnaA03g27380D	chrA03:13498436-13500136	Purple	Green	OK	22.8693	7.43813	-1.6204	-2.50013	0.001	0.0115482	yes
BnaA03g27450D	chrA03:13525861-13528454	Purple	Green	OK	3.34093	9.77014	1.54813	2.32966	0.00275	0.0252719	yes
BnaA03g27520D	chrA03:13548720-13549809	Purple	Green	OK	11.3897	0	#NAME?	#NAME?	5e-05	0.000959923	yes
BnaA03g27770D	chrA03:13633435-13636441	Purple	Green	OK	19.9106	6.65252	-1.58157	-2.77816	0.0001	0.00178191	yes
BnaA03g27780D	chrA03:13640902-13642397	Purple	Green	OK	33.9446	0	#NAME?	#NAME?	5e-05	0.000959923	yes
BnaA03g27920D	chrA03:13683527-13685486	Purple	Green	OK	0.837509	3.90078	2.21958	2.5973	0.00255	0.0239183	yes
BnaA03g27990D	chrA03:13706209-13707162	Purple	Green	OK	3.64492	0	#NAME?	#NAME?	5e-05	0.000959923	yes
BnaA03g28050D	chrA03:13726358-13728064	Purple	Green	OK	2.20508	7.31192	1.72942	2.20114	0.0044	0.03611	yes
BnaA03g28230D	chrA03:13785648-13786041	Purple	Green	OK	3.13133	0	#NAME?	#NAME?	0.00495	0.0388809	yes
BnaA03g28310D	chrA03:13806774-13810399	Purple	Green	OK	6.27973	1.68713	-1.89613	-2.55999	0.00135	0.0146315	yes
BnaA03g28320D	chrA03:13811048-13811711	Purple	Green	OK	21.8805	1.52866	-3.8393	-3.38466	0.0055	0.0420248	yes
BnaA03g28400D	chrA03:13873589-13877533	Purple	Green	OK	4.07717	13.566	1.73435	2.84133	0.0001	0.00178191	yes
BnaA03g28440D	chrA03:13886614-13889360	Purple	Green	OK	15.6674	2.0158	-2.95834	-4.38085	5e-05	0.000959923	yes
BnaA03g28480D	chrA03:13905711-13907569	Purple	Green	OK	10.1763	2.2649	-2.16769	-2.72942	0.0015	0.0159334	yes
BnaA03g28710D	chrA03:13991427-13993851	Purple	Green	OK	25.1289	10.0053	-1.32859	-2.21627	0.00245	0.0231894	yes
BnaA03g28730D	chrA03:13997000-13999360	Purple	Green	OK	2.97177	10.0345	1.75557	2.48043	0.0022	0.0212956	yes
BnaA03g28820D	chrA03:14031865-14033165	Purple	Green	OK	99.4133	240.322	1.27346	1.92125	0.0065	0.0472938	yes
BnaA03g29050D	chrA03:14127859-14130052	Purple	Green	OK	17.1117	40.5566	1.24495	2.18534	0.0032	0.028339	yes
BnaA03g29180D	chrA03:14201508-14203925	Purple	Green	OK	14.546	2.84939	-2.3519	-3.26427	0.00025	0.00378451	yes
BnaA03g29290D	chrA03:14236219-14237393	Purple	Green	OK	2.70183	0	#NAME?	#NAME?	5e-05	0.000959923	yes
BnaA03g29460D	chrA03:14324183-14327504	Purple	Green	OK	3.32476	8.64858	1.37921	2.21164	0.0033	0.0289006	yes
BnaA03g29760D	chrA03:14474155-14475915	Purple	Green	OK	19.4829	4.79806	-2.02169	-2.88556	0.00035	0.00494884	yes
BnaA03g29800D	chrA03:14490225-14491101	Purple	Green	OK	16.0028	3.95363	-2.01708	-2.59498	0.00235	0.022422	yes
BnaA03g29810D	chrA03:14491474-14494135	Purple	Green	OK	30.6626	11.0423	-1.47343	-2.44992	0.00045	0.00606143	yes
BnaA03g29970D	chrA03:14569253-14571008	Purple	Green	OK	5.77929	1.00166	-2.5285	-2.78391	0.0033	0.0289006	yes
BnaA03g30090D	chrA03:14607692-14614138	Purple	Green	OK	0	8.07268	inf	#NAME?	0.00025	0.00378451	yes
BnaA03g30120D	chrA03:14624362-14626179	Purple	Green	OK	21.3124	6.64238	-1.68192	-2.3444	0.0023	0.0220633	yes
BnaA03g30130D	chrA03:14628635-14630077	Purple	Green	OK	14.9396	4.90351	-1.60725	-2.4501	0.00235	0.022422	yes
BnaA03g30240D	chrA03:14673353-14673967	Purple	Green	OK	47.4444	0	#NAME?	#NAME?	5e-05	0.000959923	yes
BnaA03g30400D	chrA03:14770800-14774223	Purple	Green	OK	1.58926	13.1556	3.04924	4.17776	5e-05	0.000959923	yes
BnaA03g30440D	chrA03:14778028-14781520	Purple	Green	OK	52.5294	10.0064	-2.3922	-3.10453	0.0008	0.0096705	yes
BnaA03g30450D	chrA03:14782528-14783688	Purple	Green	OK	38.3247	13.3495	-1.52149	-2.35859	0.0029	0.0263271	yes
BnaA03g30580D	chrA03:14828138-14829966	Purple	Green	OK	27.3981	91.023	1.73216	2.92909	0.0001	0.00178191	yes
BnaA03g30740D	chrA03:14889483-14890977	Purple	Green	OK	0	38.0345	inf	#NAME?	5e-05	0.000959923	yes
BnaA03g30970D	chrA03:14979743-14986028	Purple	Green	OK	1.74073	4.46419	1.3587	2.03836	0.00495	0.0388809	yes
BnaA03g31120D	chrA03:15044183-15044489	Purple	Green	OK	531.824	47.656	-3.48022	-3.78185	0.001	0.0115482	yes
BnaA03g31180D	chrA03:15077800-15080937	Purple	Green	OK	1.51005	5.14321	1.76807	2.56089	0.00145	0.0154949	yes
BnaA03g31290D	chrA03:15113750-15117273	Purple	Green	OK	25.8146	4.29747	-2.58663	-4.1997	5e-05	0.000959923	yes
BnaA03g31300D	chrA03:15119603-15121514	Purple	Green	OK	6.69179	1.0336	-2.69471	-2.5797	0.0069	0.0493788	yes
BnaA03g31350D	chrA03:15136897-15142703	Purple	Green	OK	8.84223	21.8875	1.30762	2.18615	0.0019	0.0190531	yes
BnaA03g31380D	chrA03:15154614-15158434	Purple	Green	OK	17.4094	7.65146	-1.18606	-1.99522	0.00495	0.0388809	yes
BnaA03g31600D	chrA03:15252875-15255103	Purple	Green	OK	15.2294	94.5367	2.63401	4.36575	5e-05	0.000959923	yes
BnaA03g31960D	chrA03:15426753-15428303	Purple	Green	OK	13.6022	3.46129	-1.97446	-2.70906	0.0005	0.0066097	yes
BnaA03g31990D	chrA03:15440852-15442991	Purple	Green	OK	13.7878	3.26074	-2.08012	-2.82473	0.0003	0.0043708	yes
BnaA03g32280D	chrA03:15575379-15578923	Purple	Green	OK	129.717	15.8229	-3.03528	-4.69042	5e-05	0.000959923	yes
BnaA03g32840D	chrA03:15872922-15875688	Purple	Green	OK	4.76851	12.0338	1.33548	1.93426	0.0067	0.0483123	yes
BnaA03g33060D	chrA03:16001566-16003970	Purple	Green	OK	7.57736	2.52841	-1.58347	-2.21128	0.00465	0.037626	yes
BnaA03g33370D	chrA03:16141665-16143825	Purple	Green	OK	57.2921	24.902	-1.20207	-2.0496	0.0044	0.03611	yes
BnaA03g33660D	chrA03:16305953-16308137	Purple	Green	OK	9.0853	0.696374	-3.7056	-3.59061	0.0027	0.0249252	yes
BnaA03g33700D	chrA03:16327692-16328656	Purple	Green	OK	0	2.2582	inf	#NAME?	0.00025	0.00378451	yes
BnaA03g33750D	chrA03:16343814-16345869	Purple	Green	OK	1.17403	4.78077	2.02577	2.63155	0.00125	0.0138073	yes
BnaA03g34110D	chrA03:16580705-16582024	Purple	Green	OK	226.513	64.7285	-1.80712	-3.10771	5e-05	0.000959923	yes
BnaA03g34220D	chrA03:16679802-16681100	Purple	Green	OK	19.6488	6.24289	-1.65416	-2.40141	0.0017	0.0174453	yes
BnaA03g34300D	chrA03:16715337-16716105	Purple	Green	OK	3.2111	0	#NAME?	#NAME?	0.0005	0.0066097	yes
BnaA03g34520D	chrA03:16796566-16798452	Purple	Green	OK	17.8499	3.33008	-2.42229	-3.37777	0.0001	0.00178191	yes
BnaA03g34610D	chrA03:16834256-16835158	Purple	Green	OK	17.11	54.385	1.66837	2.51927	0.0008	0.0096705	yes
BnaA03g34680D	chrA03:16863303-16866366	Purple	Green	OK	8.11171	0.699147	-3.53634	-4.00587	0.00035	0.00494884	yes
BnaA03g34790D	chrA03:16964586-16966086	Purple	Green	OK	39.9631	17.7274	-1.17268	-2.05256	0.0045	0.0367539	yes
BnaA03g35510D	chrA03:17336719-17343664	Purple	Green	OK	3.68514	8.37337	1.18409	2.04742	0.00635	0.0465918	yes
BnaA03g35580D	chrA03:17375026-17376862	Purple	Green	OK	1.03833	9.83615	3.24382	3.94148	0.00035	0.00494884	yes
BnaA03g35690D	chrA03:17424582-17426312	Purple	Green	OK	0	2.17318	inf	#NAME?	5e-05	0.000959923	yes
BnaA03g35870D	chrA03:17520406-17521947	Purple	Green	OK	0	10.8486	inf	#NAME?	5e-05	0.000959923	yes
BnaA03g36210D	chrA03:17700380-17702284	Purple	Green	OK	1.61425	17.6407	3.44996	4.49404	5e-05	0.000959923	yes
BnaA03g36560D	chrA03:17956529-17956937	Purple	Green	OK	42.7023	139.175	1.70452	2.62292	0.0007	0.00871608	yes
BnaA03g36910D	chrA03:18136807-18141374	Purple	Green	OK	18.6546	1.36882	-3.76853	-5.01893	5e-05	0.000959923	yes
BnaA03g36950D	chrA03:18202787-18204637	Purple	Green	OK	20.431	7.33909	-1.47709	-2.13276	0.00615	0.0455158	yes
BnaA03g37120D	chrA03:18348908-18350279	Purple	Green	OK	11.9814	37.14	1.63218	2.71715	0.0004	0.0055115	yes
BnaA03g37360D	chrA03:18518040-18519411	Purple	Green	OK	25.8862	57.0553	1.14018	1.98838	0.00675	0.0485661	yes
BnaA03g37540D	chrA03:18617355-18619516	Purple	Green	OK	1.44859	5.1745	1.83677	2.42026	0.00255	0.0239183	yes
BnaA03g37550D	chrA03:18623010-18623744	Purple	Green	OK	454.74	38.8191	-3.5502	-4.79372	5e-05	0.000959923	yes
BnaA03g37650D	chrA03:18673477-18676795	Purple	Green	OK	2.17076	0	#NAME?	#NAME?	5e-05	0.000959923	yes
BnaA03g37660D	chrA03:18679264-18680636	Purple	Green	OK	75.5051	31.6532	-1.25422	-2.1802	0.003	0.0270165	yes
BnaA03g37780D	chrA03:18792098-18793680	Purple	Green	OK	45.4014	16.3976	-1.46926	-2.44875	0.001	0.0115482	yes
BnaA03g37820D	chrA03:18817505-18818306	Purple	Green	OK	36.6417	4.39836	-3.05845	-3.41565	0.00145	0.0154949	yes
BnaA03g37990D	chrA03:18874743-18875627	Purple	Green	OK	121.293	456.346	1.91163	2.76631	0.0002	0.00316579	yes
BnaA03g38130D	chrA03:18945352-18949017	Purple	Green	OK	8.74655	26.2733	1.58681	2.39715	0.00155	0.0163505	yes
BnaA03g38180D	chrA03:18972238-18973992	Purple	Green	OK	101.652	32.587	-1.64127	-2.68368	5e-05	0.000959923	yes
BnaA03g38200D	chrA03:18986758-18993048	Purple	Green	OK	3.99273	13.3195	1.73809	3.00624	5e-05	0.000959923	yes
BnaA03g38360D	chrA03:19057914-19062698	Purple	Green	OK	13.3523	3.14044	-2.08805	-3.30207	5e-05	0.000959923	yes
BnaA03g38410D	chrA03:19086873-19088772	Purple	Green	OK	17.8029	5.40006	-1.72107	-2.77771	0.00025	0.00378451	yes
BnaA03g38480D	chrA03:19128198-19131077	Purple	Green	OK	4.52885	1.28019	-1.82279	-2.29211	0.0032	0.028339	yes
BnaA03g38630D	chrA03:19203132-19203618	Purple	Green	OK	610.397	89.2919	-2.77315	-3.6519	5e-05	0.000959923	yes
BnaA03g38920D	chrA03:19349858-19353150	Purple	Green	OK	187.953	42.6326	-2.14034	-3.62656	5e-05	0.000959923	yes
BnaA03g39020D	chrA03:19413012-19414337	Purple	Green	OK	6.25499	14.8253	1.24499	2.09677	0.00555	0.0422857	yes
BnaA03g39040D	chrA03:19419013-19421562	Purple	Green	OK	15.4576	0	#NAME?	#NAME?	5e-05	0.000959923	yes
BnaA03g39110D	chrA03:19488084-19492085	Purple	Green	OK	5.01214	13.9008	1.47167	2.18337	0.002	0.0198091	yes
BnaA03g39350D	chrA03:19603013-19603304	Purple	Green	OK	50.5877	223.263	2.14188	2.70405	0.00035	0.00494884	yes
BnaA03g39390D	chrA03:19622859-19624299	Purple	Green	OK	3.46872	0	#NAME?	#NAME?	5e-05	0.000959923	yes
BnaA03g39700D	chrA03:19802207-19802608	Purple	Green	OK	84.6858	0	#NAME?	#NAME?	5e-05	0.000959923	yes
BnaA03g39710D	chrA03:19802711-19807484	Purple	Green	OK	280.046	78.864	-1.82823	-2.87096	0.0002	0.00316579	yes
BnaA03g39860D	chrA03:19914377-19915265	Purple	Green	OK	5.68712	0	#NAME?	#NAME?	5e-05	0.000959923	yes
BnaA03g40090D	chrA03:20032259-20035412	Purple	Green	OK	3.69862	14.4023	1.96124	2.82725	0.0007	0.00871608	yes
BnaA03g40190D	chrA03:20068683-20070033	Purple	Green	OK	2.24662	13.2607	2.56133	3.13203	0.0009	0.0105621	yes
BnaA03g40200D	chrA03:20093960-20095008	Purple	Green	OK	8.82181	0	#NAME?	#NAME?	5e-05	0.000959923	yes
BnaA03g40270D	chrA03:20140009-20141065	Purple	Green	OK	0	2.04294	inf	#NAME?	5e-05	0.000959923	yes
BnaA03g40310D	chrA03:20150594-20152466	Purple	Green	OK	10.3711	2.778	-1.90044	-2.48718	0.0021	0.0205893	yes
BnaA03g40370D	chrA03:20181913-20182510	Purple	Green	OK	55.1782	1.79876	-4.93902	-4.77685	0.0039	0.0330953	yes
BnaA03g41090D	chrA03:20612970-20615477	Purple	Green	OK	3.35413	9.70739	1.53315	2.28408	0.0024	0.0227971	yes
BnaA03g41150D	chrA03:20629958-20631374	Purple	Green	OK	12.4946	36.6612	1.55295	2.36643	0.00165	0.0170553	yes
BnaA03g41280D	chrA03:20676688-20678138	Purple	Green	OK	11.1909	38.3725	1.77774	2.89948	5e-05	0.000959923	yes
BnaA03g41940D	chrA03:21069648-21071121	Purple	Green	OK	5.75424	23.2129	2.01223	3.20045	5e-05	0.000959923	yes
BnaA03g42030D	chrA03:21115816-21117555	Purple	Green	OK	10.8764	67.18	2.62682	3.68247	5e-05	0.000959923	yes
BnaA03g42310D	chrA03:21243554-21244973	Purple	Green	OK	62.4568	24.2749	-1.36339	-2.34914	0.0012	0.0133692	yes
BnaA03g42520D	chrA03:21325548-21326869	Purple	Green	OK	47.2069	16.9951	-1.47388	-2.48813	0.00125	0.0138073	yes
BnaA03g42630D	chrA03:21364955-21366407	Purple	Green	OK	3.67647	11.081	1.5917	2.24199	0.00355	0.0305691	yes
BnaA03g42750D	chrA03:21437701-21442904	Purple	Green	OK	163.138	34.5269	-2.2403	-3.18912	0.00025	0.00378451	yes
BnaA03g42880D	chrA03:21530241-21530987	Purple	Green	OK	14.1817	0	#NAME?	#NAME?	5e-05	0.000959923	yes
BnaA03g42940D	chrA03:21561949-21563838	Purple	Green	OK	37.9988	194.954	2.35911	3.67769	5e-05	0.000959923	yes
BnaA03g42950D	chrA03:21566120-21568314	Purple	Green	OK	13.8223	35.8862	1.37643	2.37857	0.00145	0.0154949	yes
BnaA03g42960D	chrA03:21570696-21572360	Purple	Green	OK	1.20536	5.29743	2.13583	3.06573	0.00435	0.0358652	yes
BnaA03g44010D	chrA03:22239755-22240262	Purple	Green	OK	2.18164	0	#NAME?	#NAME?	0.0005	0.0066097	yes
BnaA03g44530D	chrA03:22618441-22619854	Purple	Green	OK	142.253	394.281	1.47077	2.21516	0.0033	0.0289006	yes
BnaA03g44570D	chrA03:22625613-22626643	Purple	Green	OK	18.8467	4.52705	-2.05767	-2.73365	0.00105	0.0120086	yes
BnaA03g44930D	chrA03:22829324-22830634	Purple	Green	OK	25.9311	127.358	2.29613	3.77595	5e-05	0.000959923	yes
BnaA03g45030D	chrA03:22882368-22883229	Purple	Green	OK	8.66319	0	#NAME?	#NAME?	0.00315	0.0280359	yes
BnaA03g45310D	chrA03:23040806-23042950	Purple	Green	OK	7.55627	2.43819	-1.63186	-2.15693	0.00505	0.0394701	yes
BnaA03g45330D	chrA03:23058621-23058993	Purple	Green	OK	19.3954	0	#NAME?	#NAME?	5e-05	0.000959923	yes
BnaA03g45820D	chrA03:23387327-23390959	Purple	Green	OK	11.2313	2.7984	-2.00485	-3.04824	5e-05	0.000959923	yes
BnaA03g45880D	chrA03:23422373-23423297	Purple	Green	OK	0	3.69783	inf	#NAME?	0.00075	0.00921228	yes
BnaA03g46250D	chrA03:23702057-23702879	Purple	Green	OK	5.85371	0	#NAME?	#NAME?	5e-05	0.000959923	yes
BnaA03g46470D	chrA03:23869321-23869886	Purple	Green	OK	75.1277	244.922	1.7049	2.97783	5e-05	0.000959923	yes
BnaA03g47590D	chrA03:24424860-24426790	Purple	Green	OK	9.69577	24.0333	1.30961	2.05002	0.00575	0.0433603	yes
BnaA03g47820D	chrA03:24560729-24562932	Purple	Green	OK	15.4369	6.01566	-1.35959	-2.04925	0.00605	0.0449786	yes
BnaA03g47930D	chrA03:24659503-24663144	Purple	Green	OK	9.0987	25.6436	1.49487	2.56861	0.00055	0.00713795	yes
BnaA03g48010D	chrA03:24684422-24685378	Purple	Green	OK	2.43041	0	#NAME?	#NAME?	5e-05	0.000959923	yes
BnaA03g48080D	chrA03:24706474-24708909	Purple	Green	OK	43.1102	18.4735	-1.22257	-2.05627	0.005	0.0391798	yes
BnaA03g48400D	chrA03:24846883-24848869	Purple	Green	OK	3.08547	16.153	2.38824	3.48525	0.00015	0.00250346	yes
BnaA03g48540D	chrA03:24895814-24896168	Purple	Green	OK	4.79033	0	#NAME?	#NAME?	0.0003	0.0043708	yes
BnaA03g48590D	chrA03:24921409-24921589	Purple	Green	OK	42.4763	0	#NAME?	#NAME?	0.00035	0.00494884	yes
BnaA03g49240D	chrA03:25336126-25337671	Purple	Green	OK	20.0603	4.7596	-2.07543	-3.01261	0.0004	0.0055115	yes
BnaA03g49250D	chrA03:25378961-25382374	Purple	Green	OK	134.959	17.7338	-2.92795	-4.67256	5e-05	0.000959923	yes
BnaA03g49570D	chrA03:25584172-25585982	Purple	Green	OK	7.0375	26.2399	1.89863	2.7845	0.0004	0.0055115	yes
BnaA03g49580D	chrA03:25586401-25588257	Purple	Green	OK	29.4098	69.9743	1.25053	2.12238	0.00315	0.0280359	yes
BnaA03g49910D	chrA03:25832960-25836339	Purple	Green	OK	13.8301	42.1094	1.60633	2.71619	0.0002	0.00316579	yes
BnaA03g50110D	chrA03:25980356-25980923	Purple	Green	OK	13.9293	0	#NAME?	#NAME?	5e-05	0.000959923	yes
BnaA03g50240D	chrA03:26085497-26086947	Purple	Green	OK	10.7307	2.39092	-2.1661	-2.31398	0.0053	0.0409662	yes
BnaA03g50270D	chrA03:26092204-26095012	Purple	Green	OK	4.05105	0	#NAME?	#NAME?	5e-05	0.000959923	yes
BnaA03g50820D	chrA03:26390874-26392764	Purple	Green	OK	2.24951	0	#NAME?	#NAME?	0.0002	0.00316579	yes
BnaA03g51180D	chrA03:26561750-26563043	Purple	Green	OK	29.2794	13.0414	-1.16679	-1.96047	0.00635	0.0465918	yes
BnaA03g51850D	chrA03:26991866-26994543	Purple	Green	OK	14.8055	2.9259	-2.33918	-3.43848	0.0002	0.00316579	yes
BnaA03g52310D	chrA03:27267290-27268611	Purple	Green	OK	4.0576	0	#NAME?	#NAME?	5e-05	0.000959923	yes
BnaA03g52320D	chrA03:27271637-27273399	Purple	Green	OK	31.1927	132.952	2.09162	3.24738	5e-05	0.000959923	yes
BnaA03g52440D	chrA03:27381373-27385468	Purple	Green	OK	2.43822	7.38988	1.59972	2.26724	0.00435	0.0358652	yes
BnaA03g52920D	chrA03:27631824-27632286	Purple	Green	OK	3.87951	24.1278	2.63675	2.73579	0.00255	0.0239183	yes
BnaA03g52940D	chrA03:27658342-27665800	Purple	Green	OK	3.89215	12.2396	1.65292	2.66843	0.0004	0.0055115	yes
BnaA03g53180D	chrA03:27829209-27831558	Purple	Green	OK	42.0203	104.327	1.31196	2.02752	0.0043	0.035563	yes
BnaA03g53980D	chrA03:28491805-28493152	Purple	Green	OK	51.1098	22.3222	-1.19512	-2.03449	0.0047	0.0378012	yes
BnaA03g54210D	chrA03:28698129-28700877	Purple	Green	OK	2.78434	32.2831	3.53537	4.62308	5e-05	0.000959923	yes
BnaA03g54270D	chrA03:28729999-28732418	Purple	Green	OK	0	2.57348	inf	#NAME?	5e-05	0.000959923	yes
BnaA03g54340D	chrA03:28881444-28881916	Purple	Green	OK	6.03906	0	#NAME?	#NAME?	0.0061	0.0452085	yes
BnaA03g54490D	chrA03:29111444-29113771	Purple	Green	OK	17.5138	38.3551	1.13093	1.8999	0.0066	0.047785	yes
BnaA03g55070D	chrA03_random:135113-139444	Purple	Green	OK	4.73946	0.35921	-3.72182	-3.46538	0.0044	0.03611	yes
BnaA03g55200D	chrA03_random:201632-206043	Purple	Green	OK	6.87926	37.0584	2.42948	4.06413	5e-05	0.000959923	yes
BnaA03g55510D	chrA03_random:317633-318381	Purple	Green	OK	2.21015	0	#NAME?	#NAME?	0.0022	0.0212956	yes
BnaA03g55560D	chrA03_random:329327-331327	Purple	Green	OK	13.6308	51.5733	1.91976	2.9956	0.00025	0.00378451	yes
BnaA03g55610D	chrA03_random:350366-351449	Purple	Green	OK	128.062	21.3431	-2.58501	-4.25814	5e-05	0.000959923	yes
BnaA03g55720D	chrA03_random:392334-392850	Purple	Green	OK	43.7562	108.953	1.31614	2.13329	0.0044	0.03611	yes
BnaA03g55750D	chrA03_random:397782-402062	Purple	Green	OK	10.4081	23.4729	1.17329	2.07613	0.00595	0.0444832	yes
BnaA03g55790D	chrA03_random:412921-414145	Purple	Green	OK	0	24.8617	inf	#NAME?	5e-05	0.000959923	yes
BnaA03g55860D	chrA03_random:446191-451356	Purple	Green	OK	11.3232	35.1741	1.63523	2.75474	0.00015	0.00250346	yes
BnaA03g55880D	chrA03_random:459273-460462	Purple	Green	OK	12.9054	29.6493	1.20002	1.97106	0.0065	0.0472938	yes
BnaA03g55890D	chrA03_random:461919-463298	Purple	Green	OK	30.1657	91.768	1.60508	2.70305	0.00025	0.00378451	yes
BnaA03g55910D	chrA03_random:476768-478769	Purple	Green	OK	4.39107	82.1967	4.22644	6.47898	5e-05	0.000959923	yes
BnaA03g55930D	chrA03_random:483721-485251	Purple	Green	OK	50.1297	18.464	-1.44095	-2.42606	0.00125	0.0138073	yes
BnaA03g56490D	chrA03_random:737986-740513	Purple	Green	OK	9.1753	3.54157	-1.37337	-2.03311	0.00685	0.0491199	yes
BnaA03g56600D	chrA03_random:781114-786287	Purple	Green	OK	4.44365	1.57281	-1.4984	-2.00094	0.0057	0.0431664	yes
BnaA03g56720D	chrA03_random:834890-837368	Purple	Green	OK	18.249	3.11769	-2.54927	-3.82279	5e-05	0.000959923	yes
BnaA03g56760D	chrA03_random:861612-863429	Purple	Green	OK	9.91435	3.20426	-1.62953	-2.20221	0.005	0.0391798	yes
BnaA03g56840D	chrA03_random:887029-888931	Purple	Green	OK	31.7676	2.30357	-3.78561	-5.5533	5e-05	0.000959923	yes
BnaA03g56880D	chrA03_random:902106-904488	Purple	Green	OK	30.3141	10.3045	-1.55671	-2.44742	0.00295	0.0266619	yes
BnaA03g57140D	chrA03_random:1017459-1019167	Purple	Green	OK	8.55553	2.29951	-1.89553	-2.39291	0.00305	0.0273685	yes
BnaA03g57250D	chrA03_random:1066732-1069636	Purple	Green	OK	9.38748	3.33505	-1.49303	-2.15542	0.0038	0.0323626	yes
BnaA03g57280D	chrA03_random:1075774-1076635	Purple	Green	OK	19.7812	0	#NAME?	#NAME?	5e-05	0.000959923	yes
BnaA03g57310D	chrA03_random:1087002-1088375	Purple	Green	OK	2.73152	0	#NAME?	#NAME?	5e-05	0.000959923	yes
BnaA03g57380D	chrA03_random:1124261-1124787	Purple	Green	OK	37.8194	0	#NAME?	#NAME?	5e-05	0.000959923	yes
BnaA03g58710D	chrA03_random:1859902-1862194	Purple	Green	OK	2.62788	7.42284	1.49807	2.09809	0.0065	0.0472938	yes
BnaA03g58790D	chrA03_random:1921458-1922848	Purple	Green	OK	6.97262	32.8067	2.23422	3.31003	0.0003	0.0043708	yes
BnaA03g58940D	chrA03_random:2011687-2014392	Purple	Green	OK	5.26628	17.9313	1.76763	2.85626	0.00015	0.00250346	yes
BnaA03g59010D	chrA03_random:2077093-2078389	Purple	Green	OK	30.917	105.025	1.76426	2.70864	0.00025	0.00378451	yes
BnaA03g59020D	chrA03_random:2079913-2082784	Purple	Green	OK	36.3267	92.5534	1.34926	2.23888	0.0016	0.016684	yes
BnaA03g59070D	chrA03_random:2111942-2114293	Purple	Green	OK	10.3568	25.023	1.27268	2.14771	0.0038	0.0323626	yes
BnaA03g59170D	chrA03_random:2224362-2226700	Purple	Green	OK	29.7553	126.727	2.0905	3.43672	5e-05	0.000959923	yes
BnaA03g59750D	chrA03_random:3764205-3765435	Purple	Green	OK	5.73226	0	#NAME?	#NAME?	5e-05	0.000959923	yes
BnaA03g60000D	chrA03_random:4279771-4285410	Purple	Green	OK	14.5072	0.343767	-5.3992	-5.39263	0.0027	0.0249252	yes
BnaA03g60050D	chrA03_random:4434180-4438110	Purple	Green	OK	2.91976	0	#NAME?	#NAME?	5e-05	0.000959923	yes
BnaA03g60750D	chrA03_random:5979311-5984906	Purple	Green	OK	4.90016	0	#NAME?	#NAME?	5e-05	0.000959923	yes
BnaA03g60760D	chrA03_random:5985261-5987105	Purple	Green	OK	4.6765	0	#NAME?	#NAME?	5e-05	0.000959923	yes
BnaA04g00080D	chrA04:45727-46645	Purple	Green	OK	42.2743	10.4569	-2.01532	-3.03243	0.0001	0.00178191	yes
BnaA04g00370D	chrA04:226995-227814	Purple	Green	OK	3.35554	0	#NAME?	#NAME?	5e-05	0.000959923	yes
BnaA04g00450D	chrA04:263304-264188	Purple	Green	OK	102.2	39.5615	-1.36922	-2.21309	0.0029	0.0263271	yes
BnaA04g00770D	chrA04:545936-547458	Purple	Green	OK	0	8.40985	inf	#NAME?	5e-05	0.000959923	yes
BnaA04g01310D	chrA04:812809-816330	Purple	Green	OK	4.38139	10.5831	1.2723	2.07251	0.0041	0.0343079	yes
BnaA04g01500D	chrA04:966696-967283	Purple	Green	OK	22.1584	157.571	2.83007	3.67583	0.0005	0.0066097	yes
BnaA04g01900D	chrA04:1209501-1210677	Purple	Green	OK	6.86197	21.488	1.64684	2.56143	0.00075	0.00921228	yes
BnaA04g02200D	chrA04:1424580-1427624	Purple	Green	OK	4.54616	13.809	1.60289	2.30951	0.004	0.0336826	yes
BnaA04g02210D	chrA04:1443147-1445422	Purple	Green	OK	0.698414	6.56403	3.23243	3.67923	0.00065	0.00821581	yes
BnaA04g02220D	chrA04:1447988-1448993	Purple	Green	OK	11.499	0	#NAME?	#NAME?	5e-05	0.000959923	yes
BnaA04g02460D	chrA04:1616347-1626263	Purple	Green	OK	1.57928	13.5007	3.0957	5.04178	5e-05	0.000959923	yes
BnaA04g02500D	chrA04:1646817-1647747	Purple	Green	OK	95.0502	12.1058	-2.97299	-4.32003	5e-05	0.000959923	yes
BnaA04g02560D	chrA04:1714023-1715343	Purple	Green	OK	12.8379	1.34972	-3.24968	-3.21336	0.0017	0.0174453	yes
BnaA04g02920D	chrA04:1928328-1928628	Purple	Green	OK	7.23937	0	#NAME?	#NAME?	0.0012	0.0133692	yes
BnaA04g03270D	chrA04:2136492-2138709	Purple	Green	OK	29.2414	1.25999	-4.53653	-5.52343	5e-05	0.000959923	yes
BnaA04g03760D	chrA04:2564834-2568464	Purple	Green	OK	31.6213	14.2863	-1.14626	-1.98112	0.0053	0.0409662	yes
BnaA04g04390D	chrA04:3241249-3244147	Purple	Green	OK	3.79053	12.6799	1.74208	2.6823	0.00035	0.00494884	yes
BnaA04g04510D	chrA04:3313786-3316541	Purple	Green	OK	0.750567	6.7539	3.16967	3.24669	0.0035	0.0302485	yes
BnaA04g04580D	chrA04:3370621-3372889	Purple	Green	OK	7.92918	17.896	1.17439	1.97593	0.0047	0.0378012	yes
BnaA04g04590D	chrA04:3386414-3386615	Purple	Green	OK	46.2846	309.05	2.73924	2.91169	0.00025	0.00378451	yes
BnaA04g05070D	chrA04:3733154-3736457	Purple	Green	OK	4.84078	15.6743	1.69509	2.65809	0.0004	0.0055115	yes
BnaA04g05190D	chrA04:3872403-3873079	Purple	Green	OK	7.45718	0	#NAME?	#NAME?	5e-05	0.000959923	yes
BnaA04g05270D	chrA04:4033078-4033492	Purple	Green	OK	0	14.1356	inf	#NAME?	5e-05	0.000959923	yes
BnaA04g05330D	chrA04:4110169-4110458	Purple	Green	OK	59.5262	0	#NAME?	#NAME?	5e-05	0.000959923	yes
BnaA04g05370D	chrA04:4128198-4128582	Purple	Green	OK	10.199	0	#NAME?	#NAME?	5e-05	0.000959923	yes
BnaA04g05380D	chrA04:4132166-4133588	Purple	Green	OK	104.695	45.2189	-1.21119	-2.05189	0.00465	0.037626	yes
BnaA04g05500D	chrA04:4252421-4254508	Purple	Green	OK	5.77418	16.1208	1.48123	2.34597	0.0014	0.0150511	yes
BnaA04g05750D	chrA04:4430947-4431157	Purple	Green	OK	17.6782	0	#NAME?	#NAME?	0.0047	0.0378012	yes
BnaA04g05830D	chrA04:4479867-4481142	Purple	Green	OK	2.64998	8.03314	1.59998	2.17153	0.00445	0.0364222	yes
BnaA04g05850D	chrA04:4501727-4502576	Purple	Green	OK	38.7378	13.7707	-1.49215	-2.12143	0.00585	0.0439358	yes
BnaA04g06640D	chrA04:5281788-5283333	Purple	Green	OK	2.38106	0	#NAME?	#NAME?	0.0002	0.00316579	yes
BnaA04g06900D	chrA04:5534628-5546147	Purple	Green	OK	34.5097	4.43743	-2.9592	-4.70343	5e-05	0.000959923	yes
BnaA04g06970D	chrA04:5644671-5647753	Purple	Green	OK	13.9402	4.03642	-1.7881	-2.74891	0.00045	0.00606143	yes
BnaA04g07530D	chrA04:6486798-6487340	Purple	Green	OK	2.77257	0	#NAME?	#NAME?	0.0061	0.0452085	yes
BnaA04g07660D	chrA04:6676732-6680484	Purple	Green	OK	3.87517	13.5337	1.80422	2.94779	0.00025	0.00378451	yes
BnaA04g07680D	chrA04:6700561-6701994	Purple	Green	OK	2.41639	0	#NAME?	#NAME?	5e-05	0.000959923	yes
BnaA04g07800D	chrA04:6858414-6861683	Purple	Green	OK	30.1951	9.88036	-1.61168	-2.70688	0.0003	0.0043708	yes
BnaA04g07870D	chrA04:6901054-6902958	Purple	Green	OK	6.6725	2.31643	-1.52633	-2.12405	0.005	0.0391798	yes
BnaA04g07970D	chrA04:6940844-6941689	Purple	Green	OK	106.509	42.1068	-1.33885	-2.17348	0.0027	0.0249252	yes
BnaA04g08280D	chrA04:7349301-7350832	Purple	Green	OK	216.775	45.8229	-2.24206	-3.73553	5e-05	0.000959923	yes
BnaA04g08480D	chrA04:7541830-7549024	Purple	Green	OK	5.3506	1.42042	-1.91338	-2.68371	0.0009	0.0105621	yes
BnaA04g08490D	chrA04:7556035-7557355	Purple	Green	OK	7.24018	1.97648	-1.8731	-2.25613	0.0055	0.0420248	yes
BnaA04g08640D	chrA04:7626126-7626931	Purple	Green	OK	17537.8	3533.39	-2.31135	-2.16939	0.0035	0.0302485	yes
BnaA04g08700D	chrA04:7718139-7718917	Purple	Green	OK	12.8728	47.4013	1.8806	2.80995	0.00015	0.00250346	yes
BnaA04g08740D	chrA04:7760721-7762442	Purple	Green	OK	3.61429	0	#NAME?	#NAME?	5e-05	0.000959923	yes
BnaA04g08950D	chrA04:8004721-8004988	Purple	Green	OK	190.871	0	#NAME?	#NAME?	5e-05	0.000959923	yes
BnaA04g08980D	chrA04:8042799-8045298	Purple	Green	OK	4.43227	0.333813	-3.73093	-3.54065	0.0025	0.0235998	yes
BnaA04g09390D	chrA04:8418535-8419574	Purple	Green	OK	6.42311	0	#NAME?	#NAME?	5e-05	0.000959923	yes
BnaA04g09570D	chrA04:8574392-8575299	Purple	Green	OK	235.726	83.1978	-1.50249	-2.57623	0.001	0.0115482	yes
BnaA04g09630D	chrA04:8622791-8624659	Purple	Green	OK	6.93283	0	#NAME?	#NAME?	5e-05	0.000959923	yes
BnaA04g09740D	chrA04:8730012-8732948	Purple	Green	OK	8.5648	25.1951	1.55665	2.57795	0.00065	0.00821581	yes
BnaA04g10260D	chrA04:9043551-9046923	Purple	Green	OK	1.05744	4.33178	2.03438	2.62334	0.00145	0.0154949	yes
BnaA04g10410D	chrA04:9145010-9146588	Purple	Green	OK	5.28598	15.0623	1.5107	2.16739	0.0043	0.035563	yes
BnaA04g10600D	chrA04:9308301-9311561	Purple	Green	OK	10.8852	0.757452	-3.84507	-3.6911	0.0024	0.0227971	yes
BnaA04g10630D	chrA04:9341845-9344837	Purple	Green	OK	1.50657	4.5775	1.6033	2.13462	0.0066	0.047785	yes
BnaA04g10730D	chrA04:9394059-9394269	Purple	Green	OK	0	21.2341	inf	#NAME?	0.006	0.0447159	yes
BnaA04g10810D	chrA04:9414684-9415956	Purple	Green	OK	4.24538	12.061	1.50639	2.35437	0.0031	0.0276948	yes
BnaA04g11010D	chrA04:9543777-9545236	Purple	Green	OK	77.5679	33.5643	-1.20853	-2.07965	0.0042	0.0350142	yes
BnaA04g12130D	chrA04:10353158-10354905	Purple	Green	OK	69.9211	333.451	2.25367	3.38597	5e-05	0.000959923	yes
BnaA04g12670D	chrA04:10681207-10682121	Purple	Green	OK	22.5068	4.37587	-2.36272	-2.73713	0.0038	0.0323626	yes
BnaA04g12790D	chrA04:10803211-10805442	Purple	Green	OK	19.9928	5.47693	-1.86804	-2.64169	0.0003	0.0043708	yes
BnaA04g12980D	chrA04:10937597-10948394	Purple	Green	OK	0.846403	2.85999	1.75659	2.80911	0.0003	0.0043708	yes
BnaA04g12990D	chrA04:10961146-10962728	Purple	Green	OK	18.1396	4.77348	-1.92603	-2.45408	0.00605	0.0449786	yes
BnaA04g13120D	chrA04:11046874-11048484	Purple	Green	OK	0.84232	13.5499	4.00777	4.28321	0.00015	0.00250346	yes
BnaA04g13140D	chrA04:11053492-11055682	Purple	Green	OK	10.4324	24.0492	1.20491	2.05291	0.0055	0.0420248	yes
BnaA04g13260D	chrA04:11172901-11174770	Purple	Green	OK	19.7384	7.92206	-1.31706	-2.82017	0.00275	0.0252719	yes
BnaA04g13410D	chrA04:11318383-11323925	Purple	Green	OK	29.8712	7.37614	-2.01782	-3.26027	5e-05	0.000959923	yes
BnaA04g13590D	chrA04:11501565-11502075	Purple	Green	OK	3.36261	20.0989	2.57946	2.69654	0.0048	0.0382235	yes
BnaA04g13690D	chrA04:11601916-11603953	Purple	Green	OK	2.78836	10.4827	1.91052	2.46778	0.0011	0.0124635	yes
BnaA04g13730D	chrA04:11612515-11613444	Purple	Green	OK	0	3.38919	inf	#NAME?	5e-05	0.000959923	yes
BnaA04g13830D	chrA04:11685199-11686706	Purple	Green	OK	480.934	14.9131	-5.01119	-6.50684	5e-05	0.000959923	yes
BnaA04g13930D	chrA04:11801474-11803232	Purple	Green	OK	4.51476	94.3067	4.38464	6.08275	5e-05	0.000959923	yes
BnaA04g13940D	chrA04:11803712-11806461	Purple	Green	OK	2.45673	13.1452	2.41973	3.54982	0.00025	0.00378451	yes
BnaA04g13980D	chrA04:11822320-11824290	Purple	Green	OK	63.0227	10.4301	-2.59512	-4.02165	5e-05	0.000959923	yes
BnaA04g14100D	chrA04:11896048-11897200	Purple	Green	OK	80.9606	284.311	1.81218	3.08628	5e-05	0.000959923	yes
BnaA04g14140D	chrA04:11933168-11933476	Purple	Green	OK	192.257	0	#NAME?	#NAME?	5e-05	0.000959923	yes
BnaA04g14230D	chrA04:12028780-12031057	Purple	Green	OK	11.5895	1.79877	-2.68774	-3.57733	0.0001	0.00178191	yes
BnaA04g14740D	chrA04:12384209-12389866	Purple	Green	OK	2.2651	0.335454	-2.75539	-2.64723	0.00605	0.0449786	yes
BnaA04g15200D	chrA04:12656672-12659382	Purple	Green	OK	20.2046	7.63025	-1.40488	-2.3327	0.0016	0.016684	yes
BnaA04g15320D	chrA04:12728082-12729062	Purple	Green	OK	6.25585	0	#NAME?	#NAME?	5e-05	0.000959923	yes
BnaA04g15400D	chrA04:12790141-12791987	Purple	Green	OK	0	2.63916	inf	#NAME?	5e-05	0.000959923	yes
BnaA04g15420D	chrA04:12807285-12809642	Purple	Green	OK	3.21465	24.7172	2.94278	4.23561	5e-05	0.000959923	yes
BnaA04g15430D	chrA04:12812837-12814879	Purple	Green	OK	6.32568	31.8613	2.33251	3.54641	5e-05	0.000959923	yes
BnaA04g15780D	chrA04:13016063-13016808	Purple	Green	OK	29.9579	122.595	2.03289	3.40316	5e-05	0.000959923	yes
BnaA04g15880D	chrA04:13057409-13057877	Purple	Green	OK	21.7481	65.1263	1.58235	2.47631	0.00085	0.0101314	yes
BnaA04g15910D	chrA04:13072509-13074245	Purple	Green	OK	0	5.21923	inf	#NAME?	5e-05	0.000959923	yes
BnaA04g16170D	chrA04:13218273-13224080	Purple	Green	OK	2.8066	7.51406	1.42077	2.35518	0.0016	0.016684	yes
BnaA04g16300D	chrA04:13300442-13301467	Purple	Green	OK	4.33575	0	#NAME?	#NAME?	0.0001	0.00178191	yes
BnaA04g16690D	chrA04:13642166-13644705	Purple	Green	OK	107.801	313.482	1.54001	2.22603	0.0015	0.0159334	yes
BnaA04g16730D	chrA04:13683241-13685736	Purple	Green	OK	11.6006	1.89867	-2.61113	-3.43085	0.00015	0.00250346	yes
BnaA04g16780D	chrA04:13718613-13720446	Purple	Green	OK	95.4777	34.5953	-1.46459	-2.51076	0.00035	0.00494884	yes
BnaA04g17120D	chrA04:13961720-13963012	Purple	Green	OK	2.43475	0	#NAME?	#NAME?	5e-05	0.000959923	yes
BnaA04g17230D	chrA04:14037885-14039809	Purple	Green	OK	3.39609	9.77498	1.52522	2.28572	0.0041	0.0343079	yes
BnaA04g17280D	chrA04:14061083-14064890	Purple	Green	OK	3.40345	11.2149	1.72035	2.76547	0.0003	0.0043708	yes
BnaA04g17300D	chrA04:14092573-14094847	Purple	Green	OK	0	4.08531	inf	#NAME?	5e-05	0.000959923	yes
BnaA04g17570D	chrA04:14259873-14261783	Purple	Green	OK	7.08762	25.9665	1.87328	3.11186	5e-05	0.000959923	yes
BnaA04g18360D	chrA04:14705923-14707314	Purple	Green	OK	24.9391	60.2795	1.27326	2.16311	0.00355	0.0305691	yes
BnaA04g18770D	chrA04:14920560-14921781	Purple	Green	OK	8.1585	0	#NAME?	#NAME?	5e-05	0.000959923	yes
BnaA04g18910D	chrA04:15017287-15017701	Purple	Green	OK	6.42748	52.793	3.03802	3.71685	0.00045	0.00606143	yes
BnaA04g19060D	chrA04:15130358-15135670	Purple	Green	OK	6.07222	13.6919	1.17303	2.02818	0.0063	0.0463525	yes
BnaA04g19180D	chrA04:15202035-15204938	Purple	Green	OK	0	5.13834	inf	#NAME?	5e-05	0.000959923	yes
BnaA04g19280D	chrA04:15250788-15251798	Purple	Green	OK	2.72261	9.9535	1.87021	2.26922	0.0053	0.0409662	yes
BnaA04g19410D	chrA04:15302592-15304360	Purple	Green	OK	87.8719	15.0852	-2.54227	-3.97391	5e-05	0.000959923	yes
BnaA04g19720D	chrA04:15419020-15421147	Purple	Green	OK	5.13053	12.8194	1.32115	2.19601	0.00355	0.0305691	yes
BnaA04g19750D	chrA04:15424550-15427677	Purple	Green	OK	3.88839	15.1452	1.96162	3.26604	5e-05	0.000959923	yes
BnaA04g19770D	chrA04:15441615-15442215	Purple	Green	OK	5.5946	0	#NAME?	#NAME?	5e-05	0.000959923	yes
BnaA04g20030D	chrA04:15532093-15535649	Purple	Green	OK	3.97605	11.8056	1.57006	2.3979	0.00165	0.0170553	yes
BnaA04g20220D	chrA04:15612829-15613285	Purple	Green	OK	44.1715	13.3408	-1.72726	-2.3557	0.003	0.0270165	yes
BnaA04g20810D	chrA04:15939214-15942368	Purple	Green	OK	3.0108	9.5637	1.66742	2.64153	0.00055	0.00713795	yes
BnaA04g21120D	chrA04:16131034-16132158	Purple	Green	OK	15.1431	0	#NAME?	#NAME?	5e-05	0.000959923	yes
BnaA04g21150D	chrA04:16144502-16148188	Purple	Green	OK	2.39215	6.27272	1.39078	2.11943	0.00425	0.0352588	yes
BnaA04g21160D	chrA04:16152862-16154389	Purple	Green	OK	4.11344	0	#NAME?	#NAME?	5e-05	0.000959923	yes
BnaA04g21530D	chrA04:16387568-16387880	Purple	Green	OK	393.206	933.55	1.24744	1.9326	0.0049	0.0388097	yes
BnaA04g21710D	chrA04:16498172-16499520	Purple	Green	OK	2.8335	0	#NAME?	#NAME?	5e-05	0.000959923	yes
BnaA04g21770D	chrA04:16526521-16529698	Purple	Green	OK	17.4773	4.49594	-1.95879	-3.22779	5e-05	0.000959923	yes
BnaA04g22020D	chrA04:16683474-16685218	Purple	Green	OK	5.21554	0.740541	-2.81617	-2.57668	0.0058	0.0436448	yes
BnaA04g22070D	chrA04:16713443-16714075	Purple	Green	OK	35.3754	318.708	3.17142	4.72208	5e-05	0.000959923	yes
BnaA04g22430D	chrA04:16915034-16917686	Purple	Green	OK	9.41564	2.08731	-2.17341	-2.9408	0.00065	0.00821581	yes
BnaA04g22620D	chrA04:16996312-16998099	Purple	Green	OK	2.33654	0	#NAME?	#NAME?	0.00095	0.0110606	yes
BnaA04g23170D	chrA04:17252737-17253536	Purple	Green	OK	68.6909	10.5308	-2.70551	-4.22149	5e-05	0.000959923	yes
BnaA04g23230D	chrA04:17324650-17325133	Purple	Green	OK	39.0168	6.61653	-2.55995	-3.14313	0.00085	0.0101314	yes
BnaA04g23260D	chrA04:17345969-17350393	Purple	Green	OK	27.6317	3.67798	-2.90934	-4.43205	5e-05	0.000959923	yes
BnaA04g23390D	chrA04:17396674-17397814	Purple	Green	OK	89.2751	6.19391	-3.84933	-4.97026	5e-05	0.000959923	yes
BnaA04g23480D	chrA04:17437338-17438835	Purple	Green	OK	32.4816	2.47553	-3.71381	-4.93945	5e-05	0.000959923	yes
BnaA04g23490D	chrA04:17443710-17446160	Purple	Green	OK	11.2376	28.8113	1.3583	2.33	0.002	0.0198091	yes
BnaA04g23600D	chrA04:17481155-17483502	Purple	Green	OK	9.84377	24.5704	1.31964	2.20357	0.0025	0.0235998	yes
BnaA04g23670D	chrA04:17506519-17511479	Purple	Green	OK	2.92826	15.7264	2.42508	3.88079	5e-05	0.000959923	yes
BnaA04g23830D	chrA04:17580160-17581267	Purple	Green	OK	12.9072	4.88736	-1.40105	-2.05379	0.00645	0.0470906	yes
BnaA04g23880D	chrA04:17615817-17616809	Purple	Green	OK	20.7294	7.01386	-1.56339	-2.14775	0.00505	0.0394701	yes
BnaA04g23900D	chrA04:17632200-17632854	Purple	Green	OK	17.3562	4.89334	-1.82656	-2.23373	0.0053	0.0409662	yes
BnaA04g23920D	chrA04:17644877-17645424	Purple	Green	OK	101.684	44.0487	-1.20692	-1.98367	0.0065	0.0472938	yes
BnaA04g23940D	chrA04:17649561-17652317	Purple	Green	OK	1.08035	12.4349	3.52483	4.35819	0.0001	0.00178191	yes
BnaA04g24270D	chrA04:17821449-17823082	Purple	Green	OK	9.09443	2.0898	-2.12162	-2.63588	0.00535	0.0412406	yes
BnaA04g24420D	chrA04:17873435-17875597	Purple	Green	OK	39.5707	8.35761	-2.24327	-3.74417	5e-05	0.000959923	yes
BnaA04g24530D	chrA04:17910642-17914464	Purple	Green	OK	0.303175	2.85179	3.23365	2.7456	0.00695	0.049645	yes
BnaA04g24960D	chrA04:18136344-18139004	Purple	Green	OK	0.814851	14.4384	4.14723	4.72925	0.0002	0.00316579	yes
BnaA04g25100D	chrA04:18193736-18196966	Purple	Green	OK	4.0858	0	#NAME?	#NAME?	5e-05	0.000959923	yes
BnaA04g25170D	chrA04:18215801-18216258	Purple	Green	OK	572.203	0	#NAME?	#NAME?	5e-05	0.000959923	yes
BnaA04g25390D	chrA04:18276259-18278693	Purple	Green	OK	366.137	78.7834	-2.21642	-3.2779	5e-05	0.000959923	yes
BnaA04g25470D	chrA04:18305340-18307553	Purple	Green	OK	133.911	11.7083	-3.51567	-5.35578	5e-05	0.000959923	yes
BnaA04g25510D	chrA04:18317702-18319179	Purple	Green	OK	27.5876	6.05432	-2.18798	-3.24231	0.0001	0.00178191	yes
BnaA04g25830D	chrA04:18448183-18449040	Purple	Green	OK	27.5685	4.05833	-2.76406	-3.12565	0.00225	0.0216665	yes
BnaA04g26060D	chrA04:18574553-18575868	Purple	Green	OK	0	9.60057	inf	#NAME?	5e-05	0.000959923	yes
BnaA04g26170D	chrA04:18639684-18640069	Purple	Green	OK	26.8994	0	#NAME?	#NAME?	0.0016	0.016684	yes
BnaA04g26400D	chrA04:18759341-18760833	Purple	Green	OK	3.12581	0	#NAME?	#NAME?	5e-05	0.000959923	yes
BnaA04g26900D	chrA04:19012923-19014240	Purple	Green	OK	2.70155	0	#NAME?	#NAME?	5e-05	0.000959923	yes
BnaA04g26910D	chrA04:19019836-19022619	Purple	Green	OK	6.17691	0.575872	-3.42307	-3.52071	0.0013	0.0142051	yes
BnaA04g27010D	chrA04:19075578-19075941	Purple	Green	OK	6.6623	0	#NAME?	#NAME?	5e-05	0.000959923	yes
BnaA04g27110D	chrA04:19121649-19122253	Purple	Green	OK	208.504	49.5128	-2.0742	-3.25075	5e-05	0.000959923	yes
BnaA04g27800D	chrA04_random:336145-336688	Purple	Green	OK	13.5363	0	#NAME?	#NAME?	5e-05	0.000959923	yes
BnaA04g28480D	chrA04_random:842836-845198	Purple	Green	OK	1.75576	27.8767	3.98889	5.25813	5e-05	0.000959923	yes
BnaA04g28680D	chrA04_random:943673-945386	Purple	Green	OK	3.91417	0.632797	-2.62889	-2.75353	0.0047	0.0378012	yes
BnaA04g28690D	chrA04_random:951409-955708	Purple	Green	OK	2.98003	0.68262	-2.12617	-2.42296	0.0043	0.035563	yes
BnaA04g28960D	chrA04_random:1103061-1105394	Purple	Green	OK	2.47288	17.9795	2.86208	3.8499	0.0001	0.00178191	yes
BnaA04g29010D	chrA04_random:1135833-1137389	Purple	Green	OK	460.647	110.828	-2.05534	-3.08754	0.0001	0.00178191	yes
BnaA04g29040D	chrA04_random:1144987-1146339	Purple	Green	OK	2.60448	0	#NAME?	#NAME?	5e-05	0.000959923	yes
BnaA04g29080D	chrA04_random:1163220-1164703	Purple	Green	OK	0	11.3425	inf	#NAME?	5e-05	0.000959923	yes
BnaA04g29090D	chrA04_random:1164773-1165730	Purple	Green	OK	0	7.71603	inf	#NAME?	5e-05	0.000959923	yes
BnaA04g29210D	chrA04_random:1268437-1268857	Purple	Green	OK	1107.99	2980.74	1.42773	2.30818	0.0014	0.0150511	yes
BnaA04g29560D	chrA04_random:1419468-1422313	Purple	Green	OK	12.6133	33.2619	1.39892	2.41687	0.00105	0.0120086	yes
BnaA04g29600D	chrA04_random:1428363-1430631	Purple	Green	OK	3.58312	13.3915	1.90203	2.72845	0.0005	0.0066097	yes
BnaA04g29670D	chrA04_random:1457261-1458638	Purple	Green	OK	0	2.3339	inf	#NAME?	5e-05	0.000959923	yes
BnaA05g00170D	chrA05:87917-88226	Purple	Green	OK	5.72696	0	#NAME?	#NAME?	0.0016	0.016684	yes
BnaA05g00430D	chrA05:205421-207581	Purple	Green	OK	10.2851	2.93612	-1.80857	-2.69338	0.0005	0.0066097	yes
BnaA05g00490D	chrA05:228839-229190	Purple	Green	OK	3.19197	0	#NAME?	#NAME?	0.0061	0.0452085	yes
BnaA05g00520D	chrA05:250274-252154	Purple	Green	OK	6.61702	2.10848	-1.64998	-2.17487	0.00445	0.0364222	yes
BnaA05g00980D	chrA05:558022-561570	Purple	Green	OK	3.80386	9.35456	1.29821	2.0469	0.00525	0.0406461	yes
BnaA05g01030D	chrA05:571894-572788	Purple	Green	OK	14.4531	2.21105	-2.70857	-3.132	0.00135	0.0146315	yes
BnaA05g01150D	chrA05:648181-650321	Purple	Green	OK	19.6238	58.2408	1.56943	2.59848	0.00045	0.00606143	yes
BnaA05g01160D	chrA05:667485-670289	Purple	Green	OK	20.4071	6.33007	-1.68878	-2.72197	0.00045	0.00606143	yes
BnaA05g01330D	chrA05:798439-799903	Purple	Green	OK	7.86273	2.91314	-1.43246	-2.12027	0.00575	0.0433603	yes
BnaA05g01380D	chrA05:808810-811783	Purple	Green	OK	37.937	4.61259	-3.03996	-4.87712	5e-05	0.000959923	yes
BnaA05g01410D	chrA05:824936-826041	Purple	Green	OK	2.1604	0	#NAME?	#NAME?	5e-05	0.000959923	yes
BnaA05g01420D	chrA05:829779-830077	Purple	Green	OK	0	508.177	inf	#NAME?	5e-05	0.000959923	yes
BnaA05g01580D	chrA05:922336-923925	Purple	Green	OK	38.214	16.6205	-1.20114	-2.01355	0.00605	0.0449786	yes
BnaA05g01790D	chrA05:1015620-1016935	Purple	Green	OK	67.5441	21.1691	-1.67387	-2.67944	0.00015	0.00250346	yes
BnaA05g01820D	chrA05:1026272-1029529	Purple	Green	OK	5.78855	2.1709	-1.41491	-1.97544	0.00685	0.0491199	yes
BnaA05g01850D	chrA05:1038337-1038898	Purple	Green	OK	109.172	0	#NAME?	#NAME?	5e-05	0.000959923	yes
BnaA05g01860D	chrA05:1039608-1041446	Purple	Green	OK	22.9527	4.17575	-2.45856	-3.5836	5e-05	0.000959923	yes
BnaA05g01890D	chrA05:1057283-1061971	Purple	Green	OK	40.2813	103.446	1.3607	2.04454	0.0048	0.0382235	yes
BnaA05g02000D	chrA05:1120258-1123350	Purple	Green	OK	5.59621	13.9939	1.32227	2.14577	0.0037	0.0316626	yes
BnaA05g02040D	chrA05:1147961-1148384	Purple	Green	OK	36.5553	5.55851	-2.71731	-2.83875	0.00255	0.0239183	yes
BnaA05g02220D	chrA05:1248350-1251010	Purple	Green	OK	3.001	9.05662	1.59353	2.16894	0.00455	0.0370417	yes
BnaA05g02250D	chrA05:1259978-1264077	Purple	Green	OK	1.71218	4.48514	1.38932	2.13307	0.0051	0.0397662	yes
BnaA05g02610D	chrA05:1418208-1419872	Purple	Green	OK	2.46302	0	#NAME?	#NAME?	5e-05	0.000959923	yes
BnaA05g02620D	chrA05:1420825-1422008	Purple	Green	OK	17.041	1.88826	-3.17388	-3.4055	0.00145	0.0154949	yes
BnaA05g02780D	chrA05:1472125-1472619	Purple	Green	OK	14.7999	183.081	3.62883	5.37698	5e-05	0.000959923	yes
BnaA05g03160D	chrA05:1718522-1720164	Purple	Green	OK	29.3846	2.32991	-3.65671	-4.50203	0.0001	0.00178191	yes
BnaA05g03180D	chrA05:1722601-1723384	Purple	Green	OK	3.72459	12.1409	1.70473	2.1506	0.00655	0.0475764	yes
BnaA05g03270D	chrA05:1832210-1832842	Purple	Green	OK	42.6423	9.76354	-2.12681	-3.11676	0.0004	0.0055115	yes
BnaA05g03320D	chrA05:1854329-1860747	Purple	Green	OK	5.79128	2.18651	-1.40525	-2.16008	0.0027	0.0249252	yes
BnaA05g03420D	chrA05:1889192-1890632	Purple	Green	OK	20.9844	5.6071	-1.90399	-2.62332	0.00145	0.0154949	yes
BnaA05g03520D	chrA05:1929835-1932124	Purple	Green	OK	30.2194	91.7694	1.60254	2.75054	0.0003	0.0043708	yes
BnaA05g03530D	chrA05:1932866-1933397	Purple	Green	OK	9.07978	26.1088	1.52381	2.0899	0.0063	0.0463525	yes
BnaA05g03540D	chrA05:1933502-1935605	Purple	Green	OK	1.9929	20.0924	3.33371	4.37333	0.0001	0.00178191	yes
BnaA05g03610D	chrA05:1963698-1965542	Purple	Green	OK	425.497	28.2368	-3.9135	-6.06703	5e-05	0.000959923	yes
BnaA05g03630D	chrA05:1975199-1976546	Purple	Green	OK	2.10008	0	#NAME?	#NAME?	0.00035	0.00494884	yes
BnaA05g03780D	chrA05:2018917-2020905	Purple	Green	OK	2.68408	11.944	2.15379	3.03	0.0005	0.0066097	yes
BnaA05g03790D	chrA05:2021752-2024301	Purple	Green	OK	2.78726	35.12	3.65537	5.41192	5e-05	0.000959923	yes
BnaA05g04060D	chrA05:2207906-2221315	Purple	Green	OK	10.5694	2.98295	-1.82508	-3.10905	0.00025	0.00378451	yes
BnaA05g04090D	chrA05:2234971-2236235	Purple	Green	OK	8.33703	43.5156	2.38393	3.18433	0.00025	0.00378451	yes
BnaA05g04200D	chrA05:2268405-2270818	Purple	Green	OK	13.4928	37.1932	1.46285	2.42214	0.0009	0.0105621	yes
BnaA05g04210D	chrA05:2274568-2276279	Purple	Green	OK	1.58571	7.03388	2.14919	2.70165	0.00205	0.0202245	yes
BnaA05g04350D	chrA05:2346674-2347556	Purple	Green	OK	57.1727	21.5046	-1.41068	-2.4081	0.00155	0.0163505	yes
BnaA05g04470D	chrA05:2397211-2399389	Purple	Green	OK	12.6003	5.1481	-1.29135	-2.0157	0.00625	0.0460879	yes
BnaA05g04480D	chrA05:2400026-2404158	Purple	Green	OK	1.07312	3.26538	1.60544	2.13541	0.00565	0.0428562	yes
BnaA05g04550D	chrA05:2433886-2434647	Purple	Green	OK	0	4.19703	inf	#NAME?	5e-05	0.000959923	yes
BnaA05g04670D	chrA05:2476501-2477889	Purple	Green	OK	18.6785	7.35256	-1.34506	-2.02942	0.00685	0.0491199	yes
BnaA05g04890D	chrA05:2577549-2578800	Purple	Green	OK	60.918	184.922	1.60198	2.76575	0.00035	0.00494884	yes
BnaA05g05010D	chrA05:2627314-2629758	Purple	Green	OK	24.8875	8.46475	-1.55588	-2.27519	0.00595	0.0444832	yes
BnaA05g05260D	chrA05:2739961-2740328	Purple	Green	OK	25.5844	0	#NAME?	#NAME?	0.0008	0.0096705	yes
BnaA05g05290D	chrA05:2748468-2749998	Purple	Green	OK	5.43026	83.4371	3.9416	5.72447	5e-05	0.000959923	yes
BnaA05g05360D	chrA05:2773196-2775162	Purple	Green	OK	4.85639	43.1822	3.15248	4.71482	5e-05	0.000959923	yes
BnaA05g05370D	chrA05:2775442-2776553	Purple	Green	OK	32.0547	236.481	2.88311	4.45904	5e-05	0.000959923	yes
BnaA05g05380D	chrA05:2777092-2778552	Purple	Green	OK	32.5198	90.6617	1.47918	2.51738	0.00065	0.00821581	yes
BnaA05g05390D	chrA05:2779691-2781687	Purple	Green	OK	2.25643	28.0299	3.63485	5.02261	5e-05	0.000959923	yes
BnaA05g05570D	chrA05:2912824-2915430	Purple	Green	OK	1.50035	13.6404	3.18452	4.33223	5e-05	0.000959923	yes
BnaA05g05600D	chrA05:2930439-2931744	Purple	Green	OK	11.9087	30.8415	1.37286	2.12543	0.00505	0.0394701	yes
BnaA05g05720D	chrA05:2993874-2994910	Purple	Green	OK	1.94302	13.365	2.78208	3.10591	0.00175	0.0178682	yes
BnaA05g05840D	chrA05:3055642-3058183	Purple	Green	OK	26.9636	72.8704	1.43432	2.47503	0.0009	0.0105621	yes
BnaA05g05890D	chrA05:3094877-3095309	Purple	Green	OK	0	12.4027	inf	#NAME?	0.00025	0.00378451	yes
BnaA05g06050D	chrA05:3224405-3224861	Purple	Green	OK	0	8.2154	inf	#NAME?	5e-05	0.000959923	yes
BnaA05g06060D	chrA05:3225053-3228007	Purple	Green	OK	3.83475	0.632948	-2.59897	-3.10975	0.0008	0.0096705	yes
BnaA05g06070D	chrA05:3228501-3229663	Purple	Green	OK	12.763	3.99211	-1.67674	-2.21345	0.0046	0.0373418	yes
BnaA05g06090D	chrA05:3237060-3239151	Purple	Green	OK	4.39046	1.14406	-1.94021	-2.2626	0.00635	0.0465918	yes
BnaA05g06130D	chrA05:3272972-3276816	Purple	Green	OK	2.48562	7.21006	1.5364	2.19654	0.0044	0.03611	yes
BnaA05g06290D	chrA05:3348895-3350401	Purple	Green	OK	5.99313	1.28208	-2.22482	-2.85739	0.0023	0.0220633	yes
BnaA05g06300D	chrA05:3351775-3352153	Purple	Green	OK	0	4.14731	inf	#NAME?	0.00475	0.0379955	yes
BnaA05g06370D	chrA05:3375252-3377603	Purple	Green	OK	85.0818	193.699	1.1869	1.93584	0.00525	0.0406461	yes
BnaA05g06400D	chrA05:3384234-3387254	Purple	Green	OK	0	4.36599	inf	#NAME?	5e-05	0.000959923	yes
BnaA05g06490D	chrA05:3527475-3531124	Purple	Green	OK	46.1778	118.814	1.36344	2.23278	0.002	0.0198091	yes
BnaA05g06650D	chrA05:3627655-3629966	Purple	Green	OK	10.528	2.80884	-1.90619	-2.63619	0.00075	0.00921228	yes
BnaA05g06680D	chrA05:3633763-3634456	Purple	Green	OK	34.2202	5.97825	-2.51705	-3.52878	0.00015	0.00250346	yes
BnaA05g06720D	chrA05:3648294-3648744	Purple	Green	OK	0	3.53705	inf	#NAME?	0.0009	0.0105621	yes
BnaA05g06750D	chrA05:3660996-3661347	Purple	Green	OK	5.70254	0	#NAME?	#NAME?	0.00035	0.00494884	yes
BnaA05g06820D	chrA05:3703793-3705815	Purple	Green	OK	36.1521	7.36471	-2.29538	-3.81896	5e-05	0.000959923	yes
BnaA05g06850D	chrA05:3719065-3720230	Purple	Green	OK	0	3.8664	inf	#NAME?	5e-05	0.000959923	yes
BnaA05g07110D	chrA05:3834169-3836497	Purple	Green	OK	3.39971	0.976869	-1.79917	-2.29019	0.00405	0.0340029	yes
BnaA05g07230D	chrA05:3898693-3900082	Purple	Green	OK	77.1536	223.204	1.53256	2.41446	0.00075	0.00921228	yes
BnaA05g07240D	chrA05:3901744-3903104	Purple	Green	OK	180.731	859.426	2.24953	3.17927	0.0001	0.00178191	yes
BnaA05g07370D	chrA05:3964614-3967402	Purple	Green	OK	4.02642	15.9091	1.98228	3.00593	0.00025	0.00378451	yes
BnaA05g07390D	chrA05:3980949-3981327	Purple	Green	OK	3.36503	0	#NAME?	#NAME?	0.0047	0.0378012	yes
BnaA05g07450D	chrA05:4008948-4010631	Purple	Green	OK	34.4171	3.297	-3.3839	-4.92077	5e-05	0.000959923	yes
BnaA05g07490D	chrA05:4045473-4046146	Purple	Green	OK	46.8122	11.8981	-1.97616	-2.3523	0.0038	0.0323626	yes
BnaA05g07520D	chrA05:4066084-4067448	Purple	Green	OK	53.6039	149.857	1.48318	2.52015	0.00065	0.00821581	yes
BnaA05g07590D	chrA05:4125406-4126897	Purple	Green	OK	6.55755	1.82349	-1.84646	-2.30294	0.00545	0.0418	yes
BnaA05g07770D	chrA05:4212846-4215672	Purple	Green	OK	12.9996	104.704	3.00977	4.83318	5e-05	0.000959923	yes
BnaA05g07870D	chrA05:4305310-4313386	Purple	Green	OK	13.2168	1.97954	-2.73914	-4.27216	5e-05	0.000959923	yes
BnaA05g07880D	chrA05:4313892-4323181	Purple	Green	OK	2.67249	0.465239	-2.52214	-2.87925	0.0022	0.0212956	yes
BnaA05g07910D	chrA05:4339902-4347536	Purple	Green	OK	4.61361	0.400895	-3.5246	-3.56313	0.00185	0.0186879	yes
BnaA05g07930D	chrA05:4355847-4366123	Purple	Green	OK	1.55196	7.1559	2.20504	3.25187	0.00015	0.00250346	yes
BnaA05g07980D	chrA05:4391846-4393667	Purple	Green	OK	11.4606	1.46692	-2.96582	-3.21971	0.0014	0.0150511	yes
BnaA05g08110D	chrA05:4446990-4448544	Purple	Green	OK	200.716	31.8513	-2.65573	-3.88877	5e-05	0.000959923	yes
BnaA05g08120D	chrA05:4453060-4453932	Purple	Green	OK	8.55769	302.326	5.14274	6.09507	5e-05	0.000959923	yes
BnaA05g08210D	chrA05:4525375-4526188	Purple	Green	OK	10.5654	1.67436	-2.65767	-2.82973	0.0032	0.028339	yes
BnaA05g08410D	chrA05:4686516-4688399	Purple	Green	OK	5.89787	0.84174	-2.80875	-3.10669	0.0024	0.0227971	yes
BnaA05g08470D	chrA05:4744139-4746969	Purple	Green	OK	12.2987	4.13331	-1.57313	-2.2461	0.0037	0.0316626	yes
BnaA05g08530D	chrA05:4771850-4774311	Purple	Green	OK	3.77578	0.571152	-2.72483	-2.58623	0.00605	0.0449786	yes
BnaA05g08710D	chrA05:4822476-4824337	Purple	Green	OK	17.9253	41.6715	1.21706	2.06752	0.0046	0.0373418	yes
BnaA05g08860D	chrA05:4892263-4895119	Purple	Green	OK	12.9283	46.3498	1.84203	3.0478	5e-05	0.000959923	yes
BnaA05g08970D	chrA05:4938240-4940717	Purple	Green	OK	0.403011	3.22541	3.00059	2.9526	0.004	0.0336826	yes
BnaA05g09180D	chrA05:5115651-5116675	Purple	Green	OK	71.536	11.0042	-2.70061	-4.03305	5e-05	0.000959923	yes
BnaA05g09280D	chrA05:5155026-5157304	Purple	Green	OK	17.0328	44.7142	1.39242	2.39811	0.0013	0.0142051	yes
BnaA05g09390D	chrA05:5198668-5200303	Purple	Green	OK	0	2.11631	inf	#NAME?	5e-05	0.000959923	yes
BnaA05g09410D	chrA05:5205391-5206192	Purple	Green	OK	102.836	307.871	1.58198	2.46704	0.00045	0.00606143	yes
BnaA05g09420D	chrA05:5206787-5207906	Purple	Green	OK	4.02204	0	#NAME?	#NAME?	5e-05	0.000959923	yes
BnaA05g09700D	chrA05:5339198-5341143	Purple	Green	OK	11.462	26.8639	1.22881	1.90976	0.00635	0.0465918	yes
BnaA05g09780D	chrA05:5393783-5394617	Purple	Green	OK	0	8.44085	inf	#NAME?	5e-05	0.000959923	yes
BnaA05g09830D	chrA05:5422965-5423514	Purple	Green	OK	147.629	9.16547	-4.00962	-4.26502	0.00055	0.00713795	yes
BnaA05g10490D	chrA05:5741604-5742865	Purple	Green	OK	43.1717	11.854	-1.86471	-2.92264	5e-05	0.000959923	yes
BnaA05g10610D	chrA05:5790019-5790953	Purple	Green	OK	4.92593	0	#NAME?	#NAME?	5e-05	0.000959923	yes
BnaA05g10620D	chrA05:5791021-5795090	Purple	Green	OK	5.58685	0	#NAME?	#NAME?	5e-05	0.000959923	yes
BnaA05g10740D	chrA05:5858724-5861651	Purple	Green	OK	2.4686	7.4103	1.58584	2.09199	0.00545	0.0418	yes
BnaA05g10910D	chrA05:5993885-5995208	Purple	Green	OK	25.2439	55.7165	1.14217	1.92833	0.00635	0.0465918	yes
BnaA05g11340D	chrA05:6351925-6354693	Purple	Green	OK	3.91405	0	#NAME?	#NAME?	5e-05	0.000959923	yes
BnaA05g11530D	chrA05:6463074-6463797	Purple	Green	OK	19.1374	5.5981	-1.77339	-2.37467	0.0027	0.0249252	yes
BnaA05g11950D	chrA05:6796335-6798355	Purple	Green	OK	47.2776	17.3995	-1.44212	-2.43665	0.00085	0.0101314	yes
BnaA05g12030D	chrA05:6855053-6858953	Purple	Green	OK	0	2.80921	inf	#NAME?	5e-05	0.000959923	yes
BnaA05g12070D	chrA05:6875269-6876949	Purple	Green	OK	0	4.79266	inf	#NAME?	5e-05	0.000959923	yes
BnaA05g12120D	chrA05:6956442-6958226	Purple	Green	OK	2.32047	8.43023	1.86115	2.51362	0.00335	0.0292424	yes
BnaA05g12210D	chrA05:7023358-7024880	Purple	Green	OK	2.04612	13.7258	2.74592	3.08542	0.0007	0.00871608	yes
BnaA05g12340D	chrA05:7132023-7136187	Purple	Green	OK	22.0462	6.74688	-1.70824	-2.73033	0.0005	0.0066097	yes
BnaA05g12390D	chrA05:7191871-7194324	Purple	Green	OK	8.88765	62.7711	2.82023	4.58747	5e-05	0.000959923	yes
BnaA05g12560D	chrA05:7244097-7244900	Purple	Green	OK	4.46693	19.4355	2.12134	2.69882	0.0019	0.0190531	yes
BnaA05g12830D	chrA05:7490090-7491450	Purple	Green	OK	3.81988	0	#NAME?	#NAME?	5e-05	0.000959923	yes
BnaA05g12980D	chrA05:7658287-7662788	Purple	Green	OK	18.5916	246.179	3.72698	5.65022	5e-05	0.000959923	yes
BnaA05g13380D	chrA05:8123161-8131489	Purple	Green	OK	1.75609	5.14452	1.55067	2.5624	0.00065	0.00821581	yes
BnaA05g13550D	chrA05:8231448-8234038	Purple	Green	OK	2.25056	13.3453	2.56798	3.68596	0.0001	0.00178191	yes
BnaA05g13560D	chrA05:8234666-8237381	Purple	Green	OK	3.6175	0.425289	-3.08848	-3.11951	0.0036	0.0309435	yes
BnaA05g13680D	chrA05:8320362-8321455	Purple	Green	OK	0	2.92175	inf	#NAME?	5e-05	0.000959923	yes
BnaA05g13750D	chrA05:8343018-8344560	Purple	Green	OK	87.1495	375.087	2.10566	3.33073	5e-05	0.000959923	yes
BnaA05g13930D	chrA05:8489667-8490604	Purple	Green	OK	37.3485	5.00929	-2.89837	-3.4348	0.0003	0.0043708	yes
BnaA05g14050D	chrA05:8565369-8566365	Purple	Green	OK	10.0907	1.5863	-2.66929	-2.72585	0.004	0.0336826	yes
BnaA05g14440D	chrA05:8909625-8915806	Purple	Green	OK	6.88164	2.27078	-1.59957	-2.59915	0.0006	0.00768631	yes
BnaA05g14820D	chrA05:9316064-9317923	Purple	Green	OK	33.2445	79.2626	1.25353	2.06682	0.0032	0.028339	yes
BnaA05g14840D	chrA05:9322571-9323268	Purple	Green	OK	0	10.1369	inf	#NAME?	5e-05	0.000959923	yes
BnaA05g14880D	chrA05:9338319-9342340	Purple	Green	OK	66.3082	7.43919	-3.15597	-5.41455	5e-05	0.000959923	yes
BnaA05g14890D	chrA05:9348470-9351086	Purple	Green	OK	241.172	37.1757	-2.69763	-3.83167	5e-05	0.000959923	yes
BnaA05g15310D	chrA05:9766480-9769085	Purple	Green	OK	9.45817	22.1638	1.22857	2.04524	0.00435	0.0358652	yes
BnaA05g15820D	chrA05:10360322-10361407	Purple	Green	OK	16.6095	42.6715	1.36126	2.07912	0.00455	0.0370417	yes
BnaA05g15910D	chrA05:10440229-10446175	Purple	Green	OK	5.04982	1.95059	-1.37232	-2.20519	0.004	0.0336826	yes
BnaA05g15980D	chrA05:10528511-10534494	Purple	Green	OK	9.19685	1.75929	-2.38615	-2.9551	0.00175	0.0178682	yes
BnaA05g16240D	chrA05:10846735-10847343	Purple	Green	OK	0	15.9514	inf	#NAME?	5e-05	0.000959923	yes
BnaA05g17210D	chrA05:11925239-11927765	Purple	Green	OK	5.05614	0.530729	-3.25199	-3.14492	0.00255	0.0239183	yes
BnaA05g18150D	chrA05:13387000-13387757	Purple	Green	OK	760.389	178.469	-2.09107	-3.2089	0.0002	0.00316579	yes
BnaA05g18160D	chrA05:13388010-13388310	Purple	Green	OK	9.08294	0	#NAME?	#NAME?	0.0001	0.00178191	yes
BnaA05g18330D	chrA05:13636757-13638241	Purple	Green	OK	0	8.10001	inf	#NAME?	5e-05	0.000959923	yes
BnaA05g18340D	chrA05:13640154-13641486	Purple	Green	OK	17.5523	4.31925	-2.02281	-2.71499	0.00075	0.00921228	yes
BnaA05g18390D	chrA05:13723034-13725213	Purple	Green	OK	0.717328	5.82497	3.02155	3.18716	0.00165	0.0170553	yes
BnaA05g18500D	chrA05:13852934-13858614	Purple	Green	OK	49.9674	114.58	1.19729	1.92074	0.00635	0.0465918	yes
BnaA05g18840D	chrA05:14270836-14272192	Purple	Green	OK	9.81532	29.1784	1.5718	2.47064	0.0009	0.0105621	yes
BnaA05g19050D	chrA05:14405097-14405794	Purple	Green	OK	0	22.1824	inf	#NAME?	5e-05	0.000959923	yes
BnaA05g19110D	chrA05:14428811-14431504	Purple	Green	OK	6.16349	1.65348	-1.89825	-2.51964	0.00375	0.0320327	yes
BnaA05g19210D	chrA05:14506534-14508129	Purple	Green	OK	0.695802	5.0888	2.87058	2.6464	0.00635	0.0465918	yes
BnaA05g19250D	chrA05:14543983-14545776	Purple	Green	OK	7.23926	2.0937	-1.78979	-2.23055	0.00605	0.0449786	yes
BnaA05g19630D	chrA05:15023609-15025103	Purple	Green	OK	42.3652	99.5735	1.23288	2.02862	0.00475	0.0379955	yes
BnaA05g19780D	chrA05:15195210-15202135	Purple	Green	OK	6.39842	0.573737	-3.47925	-3.34189	0.00215	0.0209639	yes
BnaA05g20040D	chrA05:15462312-15464656	Purple	Green	OK	5.64154	0.79994	-2.81812	-2.90087	0.0034	0.0295699	yes
BnaA05g20100D	chrA05:15560258-15562212	Purple	Green	OK	30.043	4.83547	-2.6353	-4.01065	5e-05	0.000959923	yes
BnaA05g20400D	chrA05:15781226-15788114	Purple	Green	OK	29.4428	12.6073	-1.22366	-2.01337	0.00565	0.0428562	yes
BnaA05g20580D	chrA05:15949193-15951939	Purple	Green	OK	7.76772	49.7	2.67768	4.41133	5e-05	0.000959923	yes
BnaA05g20720D	chrA05:16066553-16068107	Purple	Green	OK	4.48421	16.876	1.91205	2.85557	0.0003	0.0043708	yes
BnaA05g21080D	chrA05:16338118-16349552	Purple	Green	OK	2.3014	5.33287	1.2124	1.98688	0.00505	0.0394701	yes
BnaA05g21090D	chrA05:16356374-16356557	Purple	Green	OK	38.4516	0	#NAME?	#NAME?	0.00025	0.00378451	yes
BnaA05g21820D	chrA05:16780181-16782752	Purple	Green	OK	4.45519	1.30803	-1.76809	-2.46672	0.0014	0.0150511	yes
BnaA05g21950D	chrA05:16857105-16858707	Purple	Green	OK	44.2034	18.4164	-1.26317	-2.14769	0.00235	0.022422	yes
BnaA05g22060D	chrA05:16927007-16928786	Purple	Green	OK	37.7292	11.6162	-1.69954	-2.74697	0.0002	0.00316579	yes
BnaA05g22260D	chrA05:17019483-17022143	Purple	Green	OK	12.2146	74.0009	2.59894	4.26573	5e-05	0.000959923	yes
BnaA05g22420D	chrA05:17097963-17099804	Purple	Green	OK	24.7563	6.42325	-1.94642	-3.00636	0.00025	0.00378451	yes
BnaA05g22430D	chrA05:17108303-17108925	Purple	Green	OK	0	3.29413	inf	#NAME?	0.00475	0.0379955	yes
BnaA05g22460D	chrA05:17114989-17116192	Purple	Green	OK	0	16.399	inf	#NAME?	5e-05	0.000959923	yes
BnaA05g22510D	chrA05:17141344-17143625	Purple	Green	OK	10.6716	2.98703	-1.837	-2.34735	0.0037	0.0316626	yes
BnaA05g22550D	chrA05:17157758-17161030	Purple	Green	OK	8.68706	3.3507	-1.37441	-2.14383	0.00425	0.0352588	yes
BnaA05g22610D	chrA05:17180867-17182055	Purple	Green	OK	6.13043	21.2373	1.79254	2.70822	0.00045	0.00606143	yes
BnaA05g22780D	chrA05:17277627-17286917	Purple	Green	OK	0.425831	2.84004	2.73756	3.5847	5e-05	0.000959923	yes
BnaA05g22860D	chrA05:17325921-17328275	Purple	Green	OK	8.87202	27.9722	1.65666	2.77433	0.0002	0.00316579	yes
BnaA05g22960D	chrA05:17439230-17441932	Purple	Green	OK	12.4629	30.6944	1.30033	2.28988	0.00245	0.0231894	yes
BnaA05g23020D	chrA05:17468435-17470787	Purple	Green	OK	11.1023	26.2378	1.24079	2.08023	0.00475	0.0379955	yes
BnaA05g23050D	chrA05:17473989-17477513	Purple	Green	OK	8.08833	2.30946	-1.80829	-2.47954	0.0013	0.0142051	yes
BnaA05g23980D	chrA05:18038588-18039195	Purple	Green	OK	2.15639	0	#NAME?	#NAME?	0.0012	0.0133692	yes
BnaA05g24100D	chrA05:18144033-18144892	Purple	Green	OK	32.1625	5.58416	-2.52597	-3.45439	0.00015	0.00250346	yes
BnaA05g24170D	chrA05:18169970-18171211	Purple	Green	OK	53.6055	142.588	1.41141	2.43065	0.0006	0.00768631	yes
BnaA05g24540D	chrA05:18316014-18317978	Purple	Green	OK	34.3456	0	#NAME?	#NAME?	5e-05	0.000959923	yes
BnaA05g24660D	chrA05:18389352-18390645	Purple	Green	OK	10.8905	2.56622	-2.08535	-2.89859	0.00035	0.00494884	yes
BnaA05g24730D	chrA05:18447258-18454587	Purple	Green	OK	29.336	1.92578	-3.92916	-5.9669	5e-05	0.000959923	yes
BnaA05g24870D	chrA05:18514210-18516176	Purple	Green	OK	2.30071	11.2073	2.28428	3.36513	0.00015	0.00250346	yes
BnaA05g24970D	chrA05:18561612-18562077	Purple	Green	OK	5.56879	36.8298	2.72544	3.29565	0.0012	0.0133692	yes
BnaA05g25000D	chrA05:18576214-18580417	Purple	Green	OK	2.0946	0.592946	-1.8207	-2.30998	0.00315	0.0280359	yes
BnaA05g25150D	chrA05:18672481-18675414	Purple	Green	OK	188.742	24.1841	-2.96428	-4.61108	5e-05	0.000959923	yes
BnaA05g25240D	chrA05:18719355-18721118	Purple	Green	OK	3.17089	10.2412	1.69143	2.13776	0.0054	0.0415285	yes
BnaA05g25390D	chrA05:18792848-18793675	Purple	Green	OK	14.7755	49.0456	1.73091	2.75274	0.00035	0.00494884	yes
BnaA05g25420D	chrA05:18808351-18809881	Purple	Green	OK	4.77213	1.45798	-1.71066	-2.11377	0.007	0.0498936	yes
BnaA05g25810D	chrA05:19019754-19022872	Purple	Green	OK	38.1833	16.8942	-1.17641	-2.00639	0.005	0.0391798	yes
BnaA05g26040D	chrA05:19167669-19167834	Purple	Green	OK	0	89.022	inf	#NAME?	0.0009	0.0105621	yes
BnaA05g26090D	chrA05:19191897-19195838	Purple	Green	OK	11.5179	1.19355	-3.27056	-4.04209	0.0002	0.00316579	yes
BnaA05g26160D	chrA05:19216849-19224589	Purple	Green	OK	1.53509	6.25432	2.02653	3.2851	5e-05	0.000959923	yes
BnaA05g26740D	chrA05:19472888-19474132	Purple	Green	OK	0	2.15492	inf	#NAME?	5e-05	0.000959923	yes
BnaA05g26900D	chrA05:19542895-19545376	Purple	Green	OK	56.943	133.146	1.22542	2.03307	0.0055	0.0420248	yes
BnaA05g27160D	chrA05:19636501-19637650	Purple	Green	OK	7.06464	0	#NAME?	#NAME?	5e-05	0.000959923	yes
BnaA05g27190D	chrA05:19643159-19644316	Purple	Green	OK	79.6871	32.1326	-1.31031	-1.96029	0.0046	0.0373418	yes
BnaA05g27280D	chrA05:19700499-19701879	Purple	Green	OK	11.0178	1.32471	-3.05608	-3.25376	0.00105	0.0120086	yes
BnaA05g27470D	chrA05:19785367-19788455	Purple	Green	OK	12.179	4.59675	-1.40571	-2.33054	0.00215	0.0209639	yes
BnaA05g27540D	chrA05:19827556-19828385	Purple	Green	OK	21.7952	170.432	2.96712	3.16097	0.00035	0.00494884	yes
BnaA05g27700D	chrA05:19898053-19899882	Purple	Green	OK	12.5974	0	#NAME?	#NAME?	5e-05	0.000959923	yes
BnaA05g28000D	chrA05:20037725-20039013	Purple	Green	OK	17.352	4.56947	-1.92501	-2.46987	0.0027	0.0249252	yes
BnaA05g28110D	chrA05:20066242-20067218	Purple	Green	OK	16.8605	73.8873	2.13168	3.67046	5e-05	0.000959923	yes
BnaA05g28470D	chrA05:20209746-20213184	Purple	Green	OK	77.5133	27.4659	-1.4968	-2.39386	0.0007	0.00871608	yes
BnaA05g28580D	chrA05:20270698-20272330	Purple	Green	OK	8.18151	2.69074	-1.60436	-2.28884	0.00295	0.0266619	yes
BnaA05g28620D	chrA05:20289937-20293557	Purple	Green	OK	3.43102	8.63755	1.33198	2.20111	0.00315	0.0280359	yes
BnaA05g28640D	chrA05:20295981-20297405	Purple	Green	OK	0	7.97943	inf	#NAME?	5e-05	0.000959923	yes
BnaA05g28820D	chrA05:20351585-20356116	Purple	Green	OK	4.87031	14.578	1.58171	2.59684	0.0004	0.0055115	yes
BnaA05g28930D	chrA05:20386570-20388610	Purple	Green	OK	10.1621	36.606	1.84888	3.05395	0.00015	0.00250346	yes
BnaA05g29110D	chrA05:20439966-20440505	Purple	Green	OK	73.9611	206.735	1.48294	2.45726	0.00065	0.00821581	yes
BnaA05g29180D	chrA05:20480474-20481919	Purple	Green	OK	222.445	92.0131	-1.27354	-1.97351	0.005	0.0391798	yes
BnaA05g29450D	chrA05:20566180-20566628	Purple	Green	OK	5.93316	0	#NAME?	#NAME?	0.0008	0.0096705	yes
BnaA05g29500D	chrA05:20581349-20583182	Purple	Green	OK	13.5228	2.99345	-2.17552	-3.19775	0.0001	0.00178191	yes
BnaA05g29510D	chrA05:20583965-20584736	Purple	Green	OK	54.3882	8.75853	-2.63453	-3.25492	0.0008	0.0096705	yes
BnaA05g29830D	chrA05:20752504-20753583	Purple	Green	OK	2.7037	0	#NAME?	#NAME?	5e-05	0.000959923	yes
BnaA05g29850D	chrA05:20766149-20767106	Purple	Green	OK	4.40854	20.2187	2.19732	2.74845	0.001	0.0115482	yes
BnaA05g29880D	chrA05:20772587-20776945	Purple	Green	OK	2.75877	7.82088	1.50331	2.21544	0.0018	0.0182563	yes
BnaA05g29940D	chrA05:20791847-20795080	Purple	Green	OK	7.57081	18.7306	1.30688	2.143	0.00295	0.0266619	yes
BnaA05g30130D	chrA05:20870855-20871845	Purple	Green	OK	2.68914	0	#NAME?	#NAME?	0.0001	0.00178191	yes
BnaA05g30280D	chrA05:20940522-20942089	Purple	Green	OK	12.2739	47.7626	1.96029	3.35051	0.0001	0.00178191	yes
BnaA05g30290D	chrA05:20949412-20950990	Purple	Green	OK	24.2906	9.21189	-1.39883	-2.24963	0.0023	0.0220633	yes
BnaA05g30420D	chrA05:21041639-21042270	Purple	Green	OK	14.2361	66.1894	2.21705	3.41311	5e-05	0.000959923	yes
BnaA05g30530D	chrA05:21082725-21086449	Purple	Green	OK	22.2558	7.87071	-1.49962	-2.35458	0.00165	0.0170553	yes
BnaA05g30740D	chrA05:21229041-21230493	Purple	Green	OK	17.1473	5.87729	-1.54476	-2.11233	0.00525	0.0406461	yes
BnaA05g30800D	chrA05:21271322-21273966	Purple	Green	OK	50.0633	20.1122	-1.31568	-2.25658	0.0014	0.0150511	yes
BnaA05g30820D	chrA05:21288823-21292052	Purple	Green	OK	126.16	27.4086	-2.20256	-3.35483	5e-05	0.000959923	yes
BnaA05g30880D	chrA05:21343681-21346025	Purple	Green	OK	7.59899	0.883502	-3.1045	-2.85999	0.00525	0.0406461	yes
BnaA05g30990D	chrA05:21459683-21463680	Purple	Green	OK	38.9139	6.21942	-2.64543	-4.3297	5e-05	0.000959923	yes
BnaA05g31120D	chrA05:21522081-21523932	Purple	Green	OK	4.09086	10.7936	1.3997	2.2082	0.0034	0.0295699	yes
BnaA05g31210D	chrA05:21561262-21561794	Purple	Green	OK	71.2162	5.18641	-3.7794	-4.39684	0.0003	0.0043708	yes
BnaA05g31370D	chrA05:21625212-21626526	Purple	Green	OK	5.58745	22.0215	1.97865	2.59745	0.00235	0.022422	yes
BnaA05g31410D	chrA05:21639257-21641520	Purple	Green	OK	40.8686	6.72926	-2.60248	-4.12489	5e-05	0.000959923	yes
BnaA05g31420D	chrA05:21642134-21644011	Purple	Green	OK	20.1251	0.811599	-4.63209	-6.30434	5e-05	0.000959923	yes
BnaA05g31470D	chrA05:21739814-21741210	Purple	Green	OK	14.7753	5.61489	-1.39586	-2.28017	0.0047	0.0378012	yes
BnaA05g31500D	chrA05:21756623-21761833	Purple	Green	OK	9.0157	3.89515	-1.21076	-1.998	0.00555	0.0422857	yes
BnaA05g31880D	chrA05:21931554-21933010	Purple	Green	OK	19.526	4.64778	-2.07078	-2.80727	0.0008	0.0096705	yes
BnaA05g31890D	chrA05:21934073-21936496	Purple	Green	OK	22.0143	5.89705	-1.90038	-3.43911	5e-05	0.000959923	yes
BnaA05g31930D	chrA05:21945255-21946338	Purple	Green	OK	82.0037	22.8571	-1.84305	-2.91063	0.00025	0.00378451	yes
BnaA05g31940D	chrA05:21947571-21949914	Purple	Green	OK	116.371	43.9649	-1.40431	-2.30188	0.0054	0.0415285	yes
BnaA05g31970D	chrA05:21997061-21998578	Purple	Green	OK	85.5305	25.0422	-1.77208	-2.95654	0.0001	0.00178191	yes
BnaA05g32250D	chrA05:22111010-22111805	Purple	Green	OK	29.6209	83.2581	1.49098	2.60601	0.0007	0.00871608	yes
BnaA05g32300D	chrA05:22124193-22128230	Purple	Green	OK	1.29078	4.22254	1.70987	2.48385	0.00105	0.0120086	yes
BnaA05g32330D	chrA05:22133587-22135289	Purple	Green	OK	15.6962	75.2877	2.26199	3.78457	5e-05	0.000959923	yes
BnaA05g32350D	chrA05:22139678-22140713	Purple	Green	OK	65.9688	194.913	1.56298	2.71265	0.00035	0.00494884	yes
BnaA05g32480D	chrA05:22285309-22291839	Purple	Green	OK	17.6146	107.298	2.60678	4.04509	5e-05	0.000959923	yes
BnaA05g32540D	chrA05:22308350-22314738	Purple	Green	OK	2.51274	9.31689	1.89058	3.13904	0.0001	0.00178191	yes
BnaA05g32550D	chrA05:22315801-22321428	Purple	Green	OK	3.14701	14.2726	2.1812	3.57541	5e-05	0.000959923	yes
BnaA05g32580D	chrA05:22328553-22330852	Purple	Green	OK	8.31423	25.8046	1.63398	2.57775	0.00085	0.0101314	yes
BnaA05g32620D	chrA05:22346034-22348645	Purple	Green	OK	2.03788	7.14565	1.81	2.25289	0.00605	0.0449786	yes
BnaA05g32730D	chrA05:22372509-22376907	Purple	Green	OK	0.595396	4.19399	2.8164	3.51916	0.00015	0.00250346	yes
BnaA05g32770D	chrA05:22391140-22394407	Purple	Green	OK	2.75939	7.47952	1.4386	2.06954	0.00565	0.0428562	yes
BnaA05g32780D	chrA05:22395024-22399817	Purple	Green	OK	10.7008	36.0588	1.75264	2.92122	0.0001	0.00178191	yes
BnaA05g32880D	chrA05:22446940-22449874	Purple	Green	OK	7.90901	2.4581	-1.68595	-2.3217	0.00325	0.0286154	yes
BnaA05g33010D	chrA05:22501799-22503481	Purple	Green	OK	11.7472	3.35622	-1.8074	-2.49931	0.0018	0.0182563	yes
BnaA05g33030D	chrA05:22506209-22509545	Purple	Green	OK	1.73661	8.25979	2.24983	3.07058	0.00025	0.00378451	yes
BnaA05g33100D	chrA05:22536170-22536565	Purple	Green	OK	12.5899	0	#NAME?	#NAME?	5e-05	0.000959923	yes
BnaA05g33160D	chrA05:22553011-22555192	Purple	Green	OK	0	3.58098	inf	#NAME?	5e-05	0.000959923	yes
BnaA05g33170D	chrA05:22556316-22563529	Purple	Green	OK	0.515363	5.94066	3.52696	4.50661	5e-05	0.000959923	yes
BnaA05g33260D	chrA05:22593459-22595300	Purple	Green	OK	23.3889	134.451	2.52318	4.10859	5e-05	0.000959923	yes
BnaA05g33310D	chrA05:22606304-22608117	Purple	Green	OK	9.58803	108.016	3.49386	5.50625	5e-05	0.000959923	yes
BnaA05g33320D	chrA05:22608688-22610192	Purple	Green	OK	3.084	20.3897	2.72496	3.34348	0.00045	0.00606143	yes
BnaA05g33350D	chrA05:22617410-22617656	Purple	Green	OK	0	54.465	inf	#NAME?	5e-05	0.000959923	yes
BnaA05g33360D	chrA05:22617999-22620001	Purple	Green	OK	14.6065	77.6894	2.41111	4.00121	5e-05	0.000959923	yes
BnaA05g33380D	chrA05:22624671-22626939	Purple	Green	OK	7.97648	29.7563	1.89937	3.16281	5e-05	0.000959923	yes
BnaA05g33390D	chrA05:22627969-22632877	Purple	Green	OK	85.406	196.461	1.20183	2.01621	0.00445	0.0364222	yes
BnaA05g33410D	chrA05:22635830-22640996	Purple	Green	OK	18.3409	0	#NAME?	#NAME?	5e-05	0.000959923	yes
BnaA05g33440D	chrA05:22649879-22653107	Purple	Green	OK	6.578	33.6961	2.35686	3.88474	5e-05	0.000959923	yes
BnaA05g33460D	chrA05:22666822-22667863	Purple	Green	OK	11.9309	37.1378	1.63819	2.20257	0.0022	0.0212956	yes
BnaA05g33470D	chrA05:22668136-22670178	Purple	Green	OK	9.96473	36.9192	1.88947	3.14698	5e-05	0.000959923	yes
BnaA05g33490D	chrA05:22673605-22676169	Purple	Green	OK	10.2051	41.6955	2.03061	3.31201	0.0001	0.00178191	yes
BnaA05g33610D	chrA05:22705481-22707709	Purple	Green	OK	11.2454	30.8216	1.45461	2.46498	0.0011	0.0124635	yes
BnaA05g33630D	chrA05:22711014-22718063	Purple	Green	OK	1.26994	5.06673	1.99629	3.17556	5e-05	0.000959923	yes
BnaA05g33850D	chrA05:22837364-22846172	Purple	Green	OK	1.6824	4.57713	1.44392	2.41605	0.0014	0.0150511	yes
BnaA05g33890D	chrA05:22867327-22867913	Purple	Green	OK	138.471	438.564	1.6632	3.01707	0.0004	0.0055115	yes
BnaA05g33910D	chrA05:22873712-22878014	Purple	Green	OK	13.5747	37.6415	1.47141	2.4865	0.0009	0.0105621	yes
BnaA05g33950D	chrA05:22889614-22890523	Purple	Green	OK	25.3356	62.9682	1.31346	2.26089	0.0018	0.0182563	yes
BnaA05g34000D	chrA05:22906553-22907630	Purple	Green	OK	16.8464	4.37107	-1.94638	-2.65802	0.0008	0.0096705	yes
BnaA05g34030D	chrA05:22998190-23001322	Purple	Green	OK	11.6921	40.9158	1.80712	3.08291	5e-05	0.000959923	yes
BnaA05g34060D	chrA05:23006705-23009259	Purple	Green	OK	3.0718	9.15776	1.57591	2.16224	0.00445	0.0364222	yes
BnaA05g34110D	chrA05:23032029-23037498	Purple	Green	OK	3.8208	0.418685	-3.18994	-3.66182	0.00085	0.0101314	yes
BnaA05g34150D	chrA05:23048879-23051372	Purple	Green	OK	33.7331	94.7824	1.49046	2.42148	0.0009	0.0105621	yes
BnaA05g34180D	chrA05:23058576-23061131	Purple	Green	OK	9.0337	28.194	1.642	2.74289	0.0004	0.0055115	yes
BnaA05g34260D	chrA05_random:41438-46624	Purple	Green	OK	8.87206	27.4843	1.63126	2.7219	0.0001	0.00178191	yes
BnaA05g34550D	chrA05_random:211305-214995	Purple	Green	OK	1.24038	5.46019	2.13817	2.9745	0.0003	0.0043708	yes
BnaA05g34600D	chrA05_random:244827-246867	Purple	Green	OK	15.1177	0	#NAME?	#NAME?	5e-05	0.000959923	yes
BnaA05g34820D	chrA05_random:348471-349214	Purple	Green	OK	0	2.0244	inf	#NAME?	0.0004	0.0055115	yes
BnaA05g34870D	chrA05_random:378131-379933	Purple	Green	OK	26.3932	10.9663	-1.26708	-2.02493	0.006	0.0447159	yes
BnaA05g34920D	chrA05_random:407962-408241	Purple	Green	OK	21.9224	0	#NAME?	#NAME?	0.0001	0.00178191	yes
BnaA05g34950D	chrA05_random:425849-426613	Purple	Green	OK	51.1861	0	#NAME?	#NAME?	5e-05	0.000959923	yes
BnaA05g35470D	chrA05_random:836588-837983	Purple	Green	OK	7.63465	2.19815	-1.79627	-2.37714	0.00335	0.0292424	yes
BnaA05g36570D	chrA05_random:2509092-2510153	Purple	Green	OK	45.4355	3.38161	-3.74804	-5.66709	5e-05	0.000959923	yes
BnaA05g36810D	chrA05_random:2705886-2707413	Purple	Green	OK	14.7226	3.43885	-2.09804	-3.02283	0.00025	0.00378451	yes
BnaA05g37000D	chrA05_random:2839098-2840312	Purple	Green	OK	23.433	4.42664	-2.40426	-2.68625	0.0024	0.0227971	yes
BnaA05g37040D	chrA05_random:2853787-2853973	Purple	Green	OK	57.3769	0	#NAME?	#NAME?	5e-05	0.000959923	yes
BnaA05g37060D	chrA05_random:2864611-2866201	Purple	Green	OK	6.12603	1.79116	-1.77406	-2.21241	0.003	0.0270165	yes
BnaA05g37430D	chrA05_random:2993929-2997343	Purple	Green	OK	6.00182	14.9542	1.31708	2.0926	0.004	0.0336826	yes
BnaA05g37480D	chrA05_random:3009208-3010598	Purple	Green	OK	22.2251	138.031	2.63473	3.79014	5e-05	0.000959923	yes
BnaA06g00200D	chrA06:94428-97136	Purple	Green	OK	25.4128	2.11349	-3.58786	-4.9352	5e-05	0.000959923	yes
BnaA06g00270D	chrA06:130176-130758	Purple	Green	OK	2.80199	0	#NAME?	#NAME?	0.0016	0.016684	yes
BnaA06g00310D	chrA06:154326-157688	Purple	Green	OK	0.453136	2.29597	2.34109	2.45557	0.0056	0.042583	yes
BnaA06g00410D	chrA06:214834-216683	Purple	Green	OK	2.51346	12.3693	2.29902	2.73939	0.00295	0.0266619	yes
BnaA06g00710D	chrA06:460022-462894	Purple	Green	OK	5.77012	18.3675	1.67049	2.88244	0.00025	0.00378451	yes
BnaA06g00740D	chrA06:470310-472855	Purple	Green	OK	16.1084	42.5	1.39964	2.40704	0.0009	0.0105621	yes
BnaA06g00780D	chrA06:511062-512409	Purple	Green	OK	14.7095	53.0664	1.85105	2.92498	0.00045	0.00606143	yes
BnaA06g00790D	chrA06:578447-580235	Purple	Green	OK	4.50502	13.2586	1.55732	2.21688	0.0044	0.03611	yes
BnaA06g00850D	chrA06:603531-606414	Purple	Green	OK	9.87363	2.23041	-2.14627	-2.67277	0.00165	0.0170553	yes
BnaA06g00870D	chrA06:609867-614977	Purple	Green	OK	19.7976	51.6746	1.38413	2.30595	0.00155	0.0163505	yes
BnaA06g00880D	chrA06:615645-617125	Purple	Green	OK	6.39167	22.6801	1.82716	2.52084	0.00175	0.0178682	yes
BnaA06g00990D	chrA06:659619-660978	Purple	Green	OK	4.88913	12.5225	1.35687	2.20505	0.0049	0.0388097	yes
BnaA06g01000D	chrA06:669852-671262	Purple	Green	OK	0	4.40494	inf	#NAME?	5e-05	0.000959923	yes
BnaA06g01010D	chrA06:671348-672477	Purple	Green	OK	0	10.5063	inf	#NAME?	5e-05	0.000959923	yes
BnaA06g01020D	chrA06:674581-677079	Purple	Green	OK	7.18904	18.3217	1.34968	2.13996	0.00375	0.0320327	yes
BnaA06g01040D	chrA06:679424-680666	Purple	Green	OK	7.22378	19.382	1.42389	2.23543	0.0022	0.0212956	yes
BnaA06g01060D	chrA06:685965-689040	Purple	Green	OK	13.6144	31.9273	1.22966	2.09025	0.00455	0.0370417	yes
BnaA06g01420D	chrA06:885463-887445	Purple	Green	OK	70.4533	28.9198	-1.28461	-2.16388	0.0031	0.0276948	yes
BnaA06g01430D	chrA06:890350-892793	Purple	Green	OK	1320.21	352.674	-1.90437	-2.23081	0.00365	0.0313038	yes
BnaA06g01490D	chrA06:924103-925013	Purple	Green	OK	0	8.2966	inf	#NAME?	0.00025	0.00378451	yes
BnaA06g01540D	chrA06:951335-954556	Purple	Green	OK	656.019	1.86052	-8.46189	-7.33144	5e-05	0.000959923	yes
BnaA06g02010D	chrA06:1171550-1172865	Purple	Green	OK	3.38485	14.3583	2.08472	2.65884	0.00275	0.0252719	yes
BnaA06g02220D	chrA06:1298157-1299866	Purple	Green	OK	5.95032	17.712	1.57369	2.53205	0.00075	0.00921228	yes
BnaA06g02230D	chrA06:1300413-1301758	Purple	Green	OK	0	2.60617	inf	#NAME?	5e-05	0.000959923	yes
BnaA06g02380D	chrA06:1368537-1370172	Purple	Green	OK	2.99348	10.7702	1.84714	2.23255	0.0061	0.0452085	yes
BnaA06g02440D	chrA06:1392499-1393888	Purple	Green	OK	2.46887	0	#NAME?	#NAME?	5e-05	0.000959923	yes
BnaA06g02650D	chrA06:1568423-1571099	Purple	Green	OK	8.30582	21.4128	1.36628	2.43556	0.0016	0.016684	yes
BnaA06g02850D	chrA06:1693269-1697305	Purple	Green	OK	9.06854	21.122	1.2198	2.10839	0.00275	0.0252719	yes
BnaA06g02870D	chrA06:1753031-1754781	Purple	Green	OK	0	5.78576	inf	#NAME?	5e-05	0.000959923	yes
BnaA06g02880D	chrA06:1756674-1757353	Purple	Green	OK	5.05898	186.819	5.20665	6.4014	5e-05	0.000959923	yes
BnaA06g03270D	chrA06:2022764-2023097	Purple	Green	OK	7.92515	0	#NAME?	#NAME?	0.0001	0.00178191	yes
BnaA06g03420D	chrA06:2084655-2087435	Purple	Green	OK	19.9802	97.7424	2.29041	3.69543	5e-05	0.000959923	yes
BnaA06g03570D	chrA06:2186633-2190432	Purple	Green	OK	7.92939	0.548097	-3.85471	-4.00786	0.0011	0.0124635	yes
BnaA06g03600D	chrA06:2209804-2215000	Purple	Green	OK	9.28202	25.2711	1.44498	2.42896	0.0009	0.0105621	yes
BnaA06g03640D	chrA06:2242343-2243820	Purple	Green	OK	28.8751	7.534	-1.93834	-2.5678	0.00215	0.0209639	yes
BnaA06g03860D	chrA06:2324121-2324355	Purple	Green	OK	30.9631	117.178	1.92007	2.21102	0.0057	0.0431664	yes
BnaA06g03880D	chrA06:2343737-2349131	Purple	Green	OK	5.32575	14.116	1.40628	2.40153	0.0014	0.0150511	yes
BnaA06g04030D	chrA06:2428313-2430607	Purple	Green	OK	4.46275	14.3008	1.68009	2.71541	0.00015	0.00250346	yes
BnaA06g04040D	chrA06:2431509-2434179	Purple	Green	OK	0.712786	9.78756	3.77941	3.88302	0.0009	0.0105621	yes
BnaA06g04130D	chrA06:2523989-2524906	Purple	Green	OK	403.658	139.304	-1.5349	-2.6955	0.0012	0.0133692	yes
BnaA06g04280D	chrA06:2583823-2585242	Purple	Green	OK	19.7732	4.01079	-2.30159	-3.45383	5e-05	0.000959923	yes
BnaA06g04320D	chrA06:2601037-2601349	Purple	Green	OK	197.198	0	#NAME?	#NAME?	5e-05	0.000959923	yes
BnaA06g04340D	chrA06:2604033-2605839	Purple	Green	OK	6.6968	0.937526	-2.83654	-2.67644	0.0066	0.047785	yes
BnaA06g04580D	chrA06:2708166-2709934	Purple	Green	OK	76.7101	30.0882	-1.35022	-2.28321	0.0016	0.016684	yes
BnaA06g04600D	chrA06:2713123-2716985	Purple	Green	OK	4.69902	12.6015	1.42317	2.18199	0.00235	0.022422	yes
BnaA06g04650D	chrA06:2728353-2728677	Purple	Green	OK	12.5578	0	#NAME?	#NAME?	5e-05	0.000959923	yes
BnaA06g04930D	chrA06:2848049-2850964	Purple	Green	OK	31.3608	69.2632	1.14313	1.93879	0.00655	0.0475764	yes
BnaA06g04950D	chrA06:2854170-2855756	Purple	Green	OK	14.7936	42.5015	1.52254	2.40599	0.0008	0.0096705	yes
BnaA06g04960D	chrA06:2857691-2858798	Purple	Green	OK	24.7861	2.00764	-3.62596	-3.85665	0.00065	0.00821581	yes
BnaA06g05050D	chrA06:2905034-2906628	Purple	Green	OK	0	5.23063	inf	#NAME?	5e-05	0.000959923	yes
BnaA06g05150D	chrA06:2948819-2950267	Purple	Green	OK	193.27	77.136	-1.32514	-2.26695	0.0019	0.0190531	yes
BnaA06g05190D	chrA06:2958826-2961914	Purple	Green	OK	5.80823	1.21983	-2.25141	-2.72875	0.00115	0.0129406	yes
BnaA06g05220D	chrA06:2980168-2981514	Purple	Green	OK	9.91302	2.85846	-1.79409	-2.23216	0.00515	0.0400755	yes
BnaA06g05340D	chrA06:3047438-3050057	Purple	Green	OK	12.1636	5.05031	-1.26813	-1.99493	0.00685	0.0491199	yes
BnaA06g05360D	chrA06:3053859-3054414	Purple	Green	OK	87.8178	312.828	1.83278	3.17227	5e-05	0.000959923	yes
BnaA06g05510D	chrA06:3117773-3118712	Purple	Green	OK	157.059	380.665	1.27721	1.9597	0.0039	0.0330953	yes
BnaA06g05540D	chrA06:3124794-3127008	Purple	Green	OK	60.6426	176.649	1.54248	2.35823	0.001	0.0115482	yes
BnaA06g05940D	chrA06:3294040-3294777	Purple	Green	OK	0	3.89472	inf	#NAME?	5e-05	0.000959923	yes
BnaA06g06290D	chrA06:3430060-3433632	Purple	Green	OK	0	3.27572	inf	#NAME?	5e-05	0.000959923	yes
BnaA06g06420D	chrA06:3481130-3483102	Purple	Green	OK	41.8208	15.7312	-1.41059	-2.40916	0.0008	0.0096705	yes
BnaA06g06960D	chrA06:3727497-3730205	Purple	Green	OK	41.7292	13.3333	-1.64602	-2.8786	0.00015	0.00250346	yes
BnaA06g06970D	chrA06:3730514-3733589	Purple	Green	OK	19.3563	2.69359	-2.8452	-4.18143	5e-05	0.000959923	yes
BnaA06g07000D	chrA06:3745283-3749162	Purple	Green	OK	12.0547	2.57203	-2.22861	-3.59678	5e-05	0.000959923	yes
BnaA06g07130D	chrA06:3811171-3812057	Purple	Green	OK	72.5962	0	#NAME?	#NAME?	5e-05	0.000959923	yes
BnaA06g07180D	chrA06:3826100-3827329	Purple	Green	OK	15.4087	2.2395	-2.78249	-3.30893	0.00055	0.00713795	yes
BnaA06g07220D	chrA06:3858878-3863537	Purple	Green	OK	2.84682	0	#NAME?	#NAME?	5e-05	0.000959923	yes
BnaA06g07300D	chrA06:3883865-3884480	Purple	Green	OK	14.8804	1.67585	-3.15045	-2.9986	0.0067	0.0483123	yes
BnaA06g07470D	chrA06:3998759-3999785	Purple	Green	OK	15.6351	4.25248	-1.87841	-2.70042	0.0005	0.0066097	yes
BnaA06g07650D	chrA06:4100093-4101885	Purple	Green	OK	7.80466	23.4033	1.5843	2.36371	0.0014	0.0150511	yes
BnaA06g07800D	chrA06:4163656-4164650	Purple	Green	OK	0	4.48745	inf	#NAME?	5e-05	0.000959923	yes
BnaA06g07930D	chrA06:4210876-4212640	Purple	Green	OK	0	2.20291	inf	#NAME?	5e-05	0.000959923	yes
BnaA06g08050D	chrA06:4297424-4298697	Purple	Green	OK	0.975199	9.12095	3.22542	2.79782	0.00435	0.0358652	yes
BnaA06g08070D	chrA06:4303898-4304970	Purple	Green	OK	0	2.47891	inf	#NAME?	5e-05	0.000959923	yes
BnaA06g08160D	chrA06:4364501-4366739	Purple	Green	OK	2.24623	7.66494	1.77077	2.44694	0.00295	0.0266619	yes
BnaA06g08510D	chrA06:4603600-4605705	Purple	Green	OK	147.275	660.613	2.1653	2.99033	0.0002	0.00316579	yes
BnaA06g08750D	chrA06:4747344-4749101	Purple	Green	OK	2.92423	9.99298	1.77286	2.36828	0.00315	0.0280359	yes
BnaA06g08840D	chrA06:4790364-4792044	Purple	Green	OK	7.86491	26.6311	1.75961	2.78399	0.00025	0.00378451	yes
BnaA06g08890D	chrA06:4820164-4822330	Purple	Green	OK	0.470605	4.72873	3.32887	2.99346	0.0066	0.047785	yes
BnaA06g08920D	chrA06:4837640-4838939	Purple	Green	OK	9.99298	2.19213	-2.18858	-2.48949	0.0032	0.028339	yes
BnaA06g08930D	chrA06:4839960-4842178	Purple	Green	OK	23.3668	8.92422	-1.38866	-2.32657	0.0022	0.0212956	yes
BnaA06g08940D	chrA06:4849917-4853774	Purple	Green	OK	4.41714	0.974093	-2.18098	-2.79851	0.00075	0.00921228	yes
BnaA06g08950D	chrA06:4855678-4856062	Purple	Green	OK	11.6792	0	#NAME?	#NAME?	5e-05	0.000959923	yes
BnaA06g08960D	chrA06:4869493-4870914	Purple	Green	OK	19.0607	3.75482	-2.34379	-3.29411	5e-05	0.000959923	yes
BnaA06g09000D	chrA06:4883246-4884347	Purple	Green	OK	1.06554	6.12246	2.52253	2.47258	0.0065	0.0472938	yes
BnaA06g09030D	chrA06:4904169-4906494	Purple	Green	OK	9.41367	1.61034	-2.54739	-3.14989	0.00035	0.00494884	yes
BnaA06g09060D	chrA06:4913092-4914400	Purple	Green	OK	9.52637	0.976238	-3.28662	-3.81309	0.0009	0.0105621	yes
BnaA06g09110D	chrA06:4926561-4927599	Purple	Green	OK	45.8043	121.248	1.40441	2.33678	0.0016	0.016684	yes
BnaA06g09210D	chrA06:4978057-4980224	Purple	Green	OK	9.52672	1.3219	-2.84937	-3.90677	5e-05	0.000959923	yes
BnaA06g09290D	chrA06:5005731-5009447	Purple	Green	OK	1.24927	3.61573	1.53321	2.27427	0.004	0.0336826	yes
BnaA06g09320D	chrA06:5014517-5014928	Purple	Green	OK	0	3.85961	inf	#NAME?	0.0009	0.0105621	yes
BnaA06g09440D	chrA06:5062898-5068467	Purple	Green	OK	8.76073	21.9836	1.32731	2.27584	0.0015	0.0159334	yes
BnaA06g09600D	chrA06:5134288-5137803	Purple	Green	OK	15.2236	4.66759	-1.70556	-2.89093	0.00015	0.00250346	yes
BnaA06g09620D	chrA06:5141200-5142484	Purple	Green	OK	24.9705	5.65509	-2.1426	-2.95836	0.00025	0.00378451	yes
BnaA06g09680D	chrA06:5174234-5174840	Purple	Green	OK	0	7.92815	inf	#NAME?	5e-05	0.000959923	yes
BnaA06g09860D	chrA06:5256725-5259379	Purple	Green	OK	23.8204	69.602	1.54693	2.77775	0.00035	0.00494884	yes
BnaA06g09940D	chrA06:5289052-5289960	Purple	Green	OK	719.038	228.319	-1.65502	-2.59414	0.0019	0.0190531	yes
BnaA06g10080D	chrA06:5347379-5349455	Purple	Green	OK	10.2909	2.5166	-2.03182	-2.65844	0.0015	0.0159334	yes
BnaA06g10100D	chrA06:5351627-5352047	Purple	Green	OK	29.0974	7.48985	-1.95788	-2.27712	0.0066	0.047785	yes
BnaA06g10160D	chrA06:5368815-5375808	Purple	Green	OK	1.16539	3.31075	1.50635	2.21902	0.00255	0.0239183	yes
BnaA06g10220D	chrA06:5403388-5405983	Purple	Green	OK	4.27071	9.59183	1.16733	1.95122	0.0065	0.0472938	yes
BnaA06g10440D	chrA06:5552396-5556875	Purple	Green	OK	5.39308	0.810125	-2.73489	-2.94853	0.00235	0.022422	yes
BnaA06g10580D	chrA06:5595536-5597753	Purple	Green	OK	13.8291	30.5121	1.14167	2.05909	0.0065	0.0472938	yes
BnaA06g10610D	chrA06:5601809-5605715	Purple	Green	OK	12.2353	0.715582	-4.09579	-5.44842	5e-05	0.000959923	yes
BnaA06g10920D	chrA06:5698478-5699436	Purple	Green	OK	11.4031	44.4833	1.96384	3.12983	5e-05	0.000959923	yes
BnaA06g11780D	chrA06:6103749-6104208	Purple	Green	OK	176.032	34.0032	-2.3721	-3.12627	0.001	0.0115482	yes
BnaA06g11890D	chrA06:6135276-6137469	Purple	Green	OK	123.139	27.4299	-2.16646	-3.62808	5e-05	0.000959923	yes
BnaA06g11900D	chrA06:6137982-6139970	Purple	Green	OK	9.64747	2.99884	-1.68575	-2.24003	0.0062	0.0457984	yes
BnaA06g12100D	chrA06:6263139-6263988	Purple	Green	OK	94.1549	5.81583	-4.01698	-4.95157	5e-05	0.000959923	yes
BnaA06g12170D	chrA06:6287706-6288627	Purple	Green	OK	2.19936	0	#NAME?	#NAME?	0.00035	0.00494884	yes
BnaA06g12220D	chrA06:6344289-6346827	Purple	Green	OK	2.91306	0	#NAME?	#NAME?	5e-05	0.000959923	yes
BnaA06g12340D	chrA06:6418267-6422880	Purple	Green	OK	5.75112	2.19147	-1.39195	-2.17354	0.0029	0.0263271	yes
BnaA06g12360D	chrA06:6426025-6429578	Purple	Green	OK	6.83884	1.68755	-2.01882	-3.02782	0.0003	0.0043708	yes
BnaA06g12520D	chrA06:6502056-6503515	Purple	Green	OK	0	4.9558	inf	#NAME?	5e-05	0.000959923	yes
BnaA06g12670D	chrA06:6551908-6553018	Purple	Green	OK	105.719	36.064	-1.5516	-2.56423	0.00015	0.00250346	yes
BnaA06g12680D	chrA06:6553487-6556046	Purple	Green	OK	0.774287	3.29525	2.08945	2.54848	0.0027	0.0249252	yes
BnaA06g12760D	chrA06:6620001-6621787	Purple	Green	OK	2.84531	18.3834	2.69174	3.53998	0.00045	0.00606143	yes
BnaA06g12800D	chrA06:6650872-6652410	Purple	Green	OK	23.7839	6.97874	-1.76895	-2.64207	0.00085	0.0101314	yes
BnaA06g12870D	chrA06:6732391-6735080	Purple	Green	OK	36.5521	3.13064	-3.54542	-4.42523	5e-05	0.000959923	yes
BnaA06g12890D	chrA06:6755498-6756641	Purple	Green	OK	15.801	5.10776	-1.62925	-2.3256	0.0021	0.0205893	yes
BnaA06g13210D	chrA06:6903194-6904360	Purple	Green	OK	8.6407	60.5616	2.80918	4.27023	5e-05	0.000959923	yes
BnaA06g13230D	chrA06:6930363-6933827	Purple	Green	OK	4.39774	13.0244	1.56638	2.5751	0.00015	0.00250346	yes
BnaA06g13240D	chrA06:6940945-6942229	Purple	Green	OK	4.27545	23.817	2.47784	3.43262	5e-05	0.000959923	yes
BnaA06g13360D	chrA06:7014135-7017232	Purple	Green	OK	0.711257	5.41006	2.9272	3.00701	0.0025	0.0235998	yes
BnaA06g13580D	chrA06:7123738-7128032	Purple	Green	OK	6.80704	22.6784	1.73622	2.66897	0.0004	0.0055115	yes
BnaA06g13670D	chrA06:7294371-7297300	Purple	Green	OK	4.55126	20.8767	2.19756	3.18633	5e-05	0.000959923	yes
BnaA06g13820D	chrA06:7355106-7356837	Purple	Green	OK	78.9027	26.042	-1.59923	-2.60227	0.0007	0.00871608	yes
BnaA06g13830D	chrA06:7362247-7363556	Purple	Green	OK	747.503	193.84	-1.94721	-2.66163	0.0003	0.0043708	yes
BnaA06g14140D	chrA06:7630776-7635223	Purple	Green	OK	10.4198	31.1348	1.5792	2.69905	0.0003	0.0043708	yes
BnaA06g14610D	chrA06:7920287-7920919	Purple	Green	OK	0	5.58567	inf	#NAME?	0.00025	0.00378451	yes
BnaA06g15000D	chrA06:8214269-8217025	Purple	Green	OK	5.23465	1.07626	-2.28207	-2.73993	0.0017	0.0174453	yes
BnaA06g15010D	chrA06:8218504-8220888	Purple	Green	OK	15.5142	1.79523	-3.11135	-4.3455	5e-05	0.000959923	yes
BnaA06g15350D	chrA06:8414155-8418070	Purple	Green	OK	8.04466	3.37047	-1.25508	-2.06449	0.00495	0.0388809	yes
BnaA06g15520D	chrA06:8509314-8509720	Purple	Green	OK	79.3177	14.5197	-2.44963	-2.9958	0.0027	0.0249252	yes
BnaA06g16210D	chrA06:9013462-9017496	Purple	Green	OK	14.5537	2.74808	-2.40489	-3.89564	5e-05	0.000959923	yes
BnaA06g16340D	chrA06:9164568-9166581	Purple	Green	OK	10.6776	1.18387	-3.17301	-3.70195	0.00035	0.00494884	yes
BnaA06g16410D	chrA06:9214202-9216125	Purple	Green	OK	6.07811	16.9298	1.47787	2.3474	0.0014	0.0150511	yes
BnaA06g16420D	chrA06:9223633-9224299	Purple	Green	OK	20.3369	4.94808	-2.03916	-2.51816	0.0023	0.0220633	yes
BnaA06g16600D	chrA06:9358110-9360080	Purple	Green	OK	0.762034	9.86016	3.69368	3.2325	0.00425	0.0352588	yes
BnaA06g16690D	chrA06:9406817-9407536	Purple	Green	OK	7.94194	0	#NAME?	#NAME?	5e-05	0.000959923	yes
BnaA06g17140D	chrA06:9699052-9700950	Purple	Green	OK	54.2081	21.2972	-1.34785	-2.33783	0.001	0.0115482	yes
BnaA06g17150D	chrA06:9704691-9709064	Purple	Green	OK	2.17752	0.392391	-2.47233	-2.57757	0.0049	0.0388097	yes
BnaA06g17310D	chrA06:9856981-9858576	Purple	Green	OK	30.0776	1.57685	-4.25358	-4.86073	0.0001	0.00178191	yes
BnaA06g17370D	chrA06:9898206-9900171	Purple	Green	OK	2.8003	0	#NAME?	#NAME?	0.0024	0.0227971	yes
BnaA06g17430D	chrA06:9931977-9933641	Purple	Green	OK	4.40617	28.2528	2.6808	3.80696	5e-05	0.000959923	yes
BnaA06g17500D	chrA06:9962446-9963055	Purple	Green	OK	24.9498	6.16978	-2.01574	-2.60868	0.00195	0.0194267	yes
BnaA06g17710D	chrA06:10104751-10109083	Purple	Green	OK	39.7735	206.575	2.37679	3.34776	5e-05	0.000959923	yes
BnaA06g17810D	chrA06:10147304-10148336	Purple	Green	OK	16.8388	5.90583	-1.51157	-2.12242	0.00515	0.0400755	yes
BnaA06g17950D	chrA06:10232148-10233078	Purple	Green	OK	10.9632	0.994799	-3.46212	-3.15777	0.0047	0.0378012	yes
BnaA06g18220D	chrA06:10461499-10465083	Purple	Green	OK	15.3527	3.18975	-2.26698	-2.85442	0.0007	0.00871608	yes
BnaA06g18250D	chrA06:10480697-10481111	Purple	Green	OK	84.8562	226.518	1.41654	2.19436	0.00165	0.0170553	yes
BnaA06g18440D	chrA06:10591887-10593442	Purple	Green	OK	43.7262	8.56599	-2.35181	-3.74226	5e-05	0.000959923	yes
BnaA06g18490D	chrA06:10622182-10624891	Purple	Green	OK	9.85156	0	#NAME?	#NAME?	5e-05	0.000959923	yes
BnaA06g18530D	chrA06:10654304-10656368	Purple	Green	OK	6.26076	0.577478	-3.4385	-3.61304	0.0013	0.0142051	yes
BnaA06g18750D	chrA06:11012596-11013382	Purple	Green	OK	5.94346	0	#NAME?	#NAME?	0.0005	0.0066097	yes
BnaA06g18890D	chrA06:11149583-11151601	Purple	Green	OK	2.53764	0	#NAME?	#NAME?	5e-05	0.000959923	yes
BnaA06g18900D	chrA06:11164689-11166061	Purple	Green	OK	15.336	1.52226	-3.33263	-3.89751	0.00025	0.00378451	yes
BnaA06g19010D	chrA06:11294366-11295338	Purple	Green	OK	25.8795	59.3606	1.1977	1.93055	0.0058	0.0436448	yes
BnaA06g19050D	chrA06:11389911-11390329	Purple	Green	OK	13.5568	0	#NAME?	#NAME?	5e-05	0.000959923	yes
BnaA06g19560D	chrA06:12066855-12067918	Purple	Green	OK	0	5.33969	inf	#NAME?	5e-05	0.000959923	yes
BnaA06g20180D	chrA06:13136391-13141886	Purple	Green	OK	2.05824	7.91119	1.94248	3.17916	5e-05	0.000959923	yes
BnaA06g20200D	chrA06:13153395-13154597	Purple	Green	OK	47.3764	9.38904	-2.33512	-3.65477	5e-05	0.000959923	yes
BnaA06g20390D	chrA06:13784983-13788956	Purple	Green	OK	3.87245	1.37653	-1.49221	-2.21023	0.0048	0.0382235	yes
BnaA06g20490D	chrA06:13985019-13993448	Purple	Green	OK	0	4.30528	inf	#NAME?	5e-05	0.000959923	yes
BnaA06g20630D	chrA06:14190621-14191269	Purple	Green	OK	33.0684	150.528	2.18651	3.38409	5e-05	0.000959923	yes
BnaA06g20750D	chrA06:14273141-14275436	Purple	Green	OK	9.97972	2.75329	-1.85784	-2.59987	0.0013	0.0142051	yes
BnaA06g20830D	chrA06:14418619-14420914	Purple	Green	OK	4.27058	13.8997	1.70255	2.18539	0.0028	0.0256155	yes
BnaA06g21190D	chrA06:14692472-14693759	Purple	Green	OK	7.39336	0	#NAME?	#NAME?	5e-05	0.000959923	yes
BnaA06g21280D	chrA06:14743844-14745306	Purple	Green	OK	16.4161	3.55002	-2.20921	-2.98588	5e-05	0.000959923	yes
BnaA06g21290D	chrA06:14747886-14752499	Purple	Green	OK	8.31085	3.31697	-1.32513	-2.17766	0.00275	0.0252719	yes
BnaA06g21300D	chrA06:14765099-14767445	Purple	Green	OK	64.248	25.8379	-1.31416	-2.18017	0.0034	0.0295699	yes
BnaA06g21910D	chrA06:15357429-15358861	Purple	Green	OK	10.5973	0	#NAME?	#NAME?	5e-05	0.000959923	yes
BnaA06g22110D	chrA06:15454007-15456585	Purple	Green	OK	18.1852	6.25625	-1.5394	-2.57923	0.00045	0.00606143	yes
BnaA06g22160D	chrA06:15480329-15482677	Purple	Green	OK	11.73	4.08596	-1.52146	-2.38428	0.00115	0.0129406	yes
BnaA06g22240D	chrA06:15531646-15534018	Purple	Green	OK	4.26008	10.968	1.36435	1.94244	0.00585	0.0439358	yes
BnaA06g22560D	chrA06:15776449-15777903	Purple	Green	OK	23.8204	3.96572	-2.58654	-3.76719	5e-05	0.000959923	yes
BnaA06g22590D	chrA06:15794882-15796852	Purple	Green	OK	42.7521	15.8565	-1.43092	-2.43036	0.00095	0.0110606	yes
BnaA06g22600D	chrA06:15798868-15802986	Purple	Green	OK	15.3097	4.9015	-1.64316	-2.75599	0.0002	0.00316579	yes
BnaA06g23050D	chrA06:16089769-16091935	Purple	Green	OK	12.2783	4.33591	-1.50171	-2.27179	0.00195	0.0194267	yes
BnaA06g23170D	chrA06:16144578-16146035	Purple	Green	OK	19.5449	2.38355	-3.03561	-4.1601	5e-05	0.000959923	yes
BnaA06g23240D	chrA06:16181642-16182600	Purple	Green	OK	2.32596	0	#NAME?	#NAME?	0.0001	0.00178191	yes
BnaA06g23380D	chrA06:16245114-16246029	Purple	Green	OK	10.8828	2.77289	-1.97259	-2.42859	0.0055	0.0420248	yes
BnaA06g23410D	chrA06:16258003-16260290	Purple	Green	OK	17.4909	43.5643	1.31654	2.34225	0.0018	0.0182563	yes
BnaA06g23870D	chrA06:16513642-16517611	Purple	Green	OK	23.4415	57.1053	1.28456	2.0984	0.00405	0.0340029	yes
BnaA06g24040D	chrA06:16613835-16616541	Purple	Green	OK	13.6538	3.78267	-1.85183	-2.96628	5e-05	0.000959923	yes
BnaA06g24050D	chrA06:16617320-16618583	Purple	Green	OK	8.53702	0	#NAME?	#NAME?	5e-05	0.000959923	yes
BnaA06g24140D	chrA06:16725134-16727004	Purple	Green	OK	8.10341	1.75901	-2.20377	-2.69104	0.0031	0.0276948	yes
BnaA06g24300D	chrA06:16879538-16881112	Purple	Green	OK	59.5416	26.4025	-1.17322	-1.98126	0.00605	0.0449786	yes
BnaA06g24360D	chrA06:16911369-16913556	Purple	Green	OK	2.4684	7.48074	1.5996	2.40392	0.00175	0.0178682	yes
BnaA06g24380D	chrA06:16986824-16987199	Purple	Green	OK	17.6098	0	#NAME?	#NAME?	5e-05	0.000959923	yes
BnaA06g24680D	chrA06:17149800-17151059	Purple	Green	OK	25.0963	2.90651	-3.11011	-3.96015	0.00035	0.00494884	yes
BnaA06g24700D	chrA06:17155069-17158343	Purple	Green	OK	9.58532	27.4447	1.51763	2.47733	0.0004	0.0055115	yes
BnaA06g24740D	chrA06:17166519-17168742	Purple	Green	OK	0	2.76552	inf	#NAME?	5e-05	0.000959923	yes
BnaA06g24820D	chrA06:17244500-17244861	Purple	Green	OK	0	166.885	inf	#NAME?	5e-05	0.000959923	yes
BnaA06g25030D	chrA06:17306730-17308307	Purple	Green	OK	36.2618	8.30005	-2.12726	-3.4103	5e-05	0.000959923	yes
BnaA06g25630D	chrA06:17740527-17742169	Purple	Green	OK	12.3	2.67581	-2.20061	-2.51257	0.0016	0.016684	yes
BnaA06g26020D	chrA06:17975545-17976592	Purple	Green	OK	40.3266	14.4345	-1.48221	-2.08588	0.00675	0.0485661	yes
BnaA06g26150D	chrA06:18031933-18033697	Purple	Green	OK	9.05244	3.13665	-1.52908	-2.29089	0.00295	0.0266619	yes
BnaA06g26380D	chrA06:18152687-18153996	Purple	Green	OK	72.1429	188.698	1.38715	2.22663	0.00165	0.0170553	yes
BnaA06g26720D	chrA06:18342530-18345719	Purple	Green	OK	7.30552	27.1867	1.89584	3.11137	5e-05	0.000959923	yes
BnaA06g26820D	chrA06:18414405-18417991	Purple	Green	OK	33.8453	80.0145	1.24131	2.03066	0.00435	0.0358652	yes
BnaA06g26830D	chrA06:18420107-18421743	Purple	Green	OK	10.555	2.67133	-1.9823	-2.54983	0.00185	0.0186879	yes
BnaA06g26980D	chrA06:18516185-18519844	Purple	Green	OK	3.14071	19.7183	2.65037	4.1443	5e-05	0.000959923	yes
BnaA06g27000D	chrA06:18537644-18542284	Purple	Green	OK	36.0469	3.11307	-3.53346	-4.65968	5e-05	0.000959923	yes
BnaA06g27100D	chrA06:18596803-18599399	Purple	Green	OK	12.3072	4.09586	-1.58726	-2.50778	0.00165	0.0170553	yes
BnaA06g27330D	chrA06:18756332-18757098	Purple	Green	OK	11.7681	2.1943	-2.42305	-2.59973	0.0044	0.03611	yes
BnaA06g27460D	chrA06:18842169-18842824	Purple	Green	OK	9.32695	37.802	2.01899	2.72446	0.00035	0.00494884	yes
BnaA06g27710D	chrA06:19057298-19059247	Purple	Green	OK	159.009	67.6564	-1.23281	-2.01838	0.00435	0.0358652	yes
BnaA06g28310D	chrA06:19452990-19454940	Purple	Green	OK	18.6105	6.80036	-1.45243	-2.44994	0.00295	0.0266619	yes
BnaA06g28610D	chrA06:19637338-19637905	Purple	Green	OK	205.426	445.507	1.11683	1.94006	0.00665	0.0480329	yes
BnaA06g28860D	chrA06:19740578-19745711	Purple	Green	OK	2.00585	7.50751	1.90412	2.36223	0.0023	0.0220633	yes
BnaA06g28870D	chrA06:19759616-19761440	Purple	Green	OK	9.61415	28.677	1.57666	2.69412	0.00045	0.00606143	yes
BnaA06g30260D	chrA06:20486352-20488167	Purple	Green	OK	12.4569	4.71353	-1.40206	-2.15688	0.00305	0.0273685	yes
BnaA06g30300D	chrA06:20503117-20510984	Purple	Green	OK	1.20551	3.9518	1.71287	2.70896	0.00045	0.00606143	yes
BnaA06g30680D	chrA06:20703294-20706548	Purple	Green	OK	7.84746	2.61258	-1.58675	-2.34879	0.00165	0.0170553	yes
BnaA06g30980D	chrA06:20870010-20871067	Purple	Green	OK	120.98	52.3317	-1.20901	-1.95381	0.00595	0.0444832	yes
BnaA06g31070D	chrA06:20900550-20901657	Purple	Green	OK	56.6391	19.7548	-1.51959	-2.69997	0.0008	0.0096705	yes
BnaA06g31190D	chrA06:20951329-20958796	Purple	Green	OK	3.83333	9.96503	1.37828	2.31435	0.0011	0.0124635	yes
BnaA06g31330D	chrA06:21079938-21087071	Purple	Green	OK	6.21648	1.4065	-2.14399	-2.62551	0.002	0.0198091	yes
BnaA06g31540D	chrA06:21159331-21159781	Purple	Green	OK	0	2.41297	inf	#NAME?	0.00575	0.0433603	yes
BnaA06g31620D	chrA06:21191433-21196750	Purple	Green	OK	1.23108	3.33812	1.43911	2.11781	0.00485	0.0385497	yes
BnaA06g31740D	chrA06:21270691-21272770	Purple	Green	OK	18.9144	5.57852	-1.76153	-2.93311	0.00015	0.00250346	yes
BnaA06g31830D	chrA06:21314751-21315321	Purple	Green	OK	296.983	0	#NAME?	#NAME?	5e-05	0.000959923	yes
BnaA06g31840D	chrA06:21316495-21317071	Purple	Green	OK	336.5	41.067	-3.03455	-4.86748	5e-05	0.000959923	yes
BnaA06g31910D	chrA06:21354357-21355254	Purple	Green	OK	23.3012	135.801	2.54302	4.21285	5e-05	0.000959923	yes
BnaA06g32870D	chrA06:21801074-21801673	Purple	Green	OK	0	4.8098	inf	#NAME?	0.002	0.0198091	yes
BnaA06g33150D	chrA06:21965204-21969471	Purple	Green	OK	3.40154	9.41911	1.4694	2.30008	0.00155	0.0163505	yes
BnaA06g33170D	chrA06:21972457-21973950	Purple	Green	OK	14.8629	4.91547	-1.59632	-2.43533	0.00095	0.0110606	yes
BnaA06g33230D	chrA06:21995498-21996564	Purple	Green	OK	34.4916	360.027	3.38379	5.43381	5e-05	0.000959923	yes
BnaA06g33300D	chrA06:22039418-22041281	Purple	Green	OK	13.4023	35.5055	1.40556	2.37911	0.00145	0.0154949	yes
BnaA06g33330D	chrA06:22055662-22070421	Purple	Green	OK	1.63544	14.0688	3.10475	4.46658	5e-05	0.000959923	yes
BnaA06g33690D	chrA06:22359902-22361481	Purple	Green	OK	16.891	38.8313	1.20096	2.07473	0.00495	0.0388809	yes
BnaA06g33850D	chrA06:22436654-22437566	Purple	Green	OK	3.3966	15.8038	2.2181	2.73166	0.0017	0.0174453	yes
BnaA06g34010D	chrA06:22521980-22524114	Purple	Green	OK	4.60718	14.4156	1.64567	2.72305	0.0003	0.0043708	yes
BnaA06g34080D	chrA06:22547028-22548301	Purple	Green	OK	0.945684	12.7458	3.75252	3.06021	0.00445	0.0364222	yes
BnaA06g34090D	chrA06:22548705-22550815	Purple	Green	OK	18.891	42.8955	1.18312	2.0379	0.00555	0.0422857	yes
BnaA06g34260D	chrA06:22642899-22644624	Purple	Green	OK	6.27344	1.66639	-1.91253	-2.45791	0.0027	0.0249252	yes
BnaA06g34320D	chrA06:22667732-22668285	Purple	Green	OK	308.739	1078.43	1.80448	3.12284	5e-05	0.000959923	yes
BnaA06g34330D	chrA06:22674803-22677791	Purple	Green	OK	10.3108	0	#NAME?	#NAME?	5e-05	0.000959923	yes
BnaA06g34430D	chrA06:22756761-22759754	Purple	Green	OK	19.2719	8.08899	-1.25247	-2.23641	0.0044	0.03611	yes
BnaA06g34500D	chrA06:22793912-22798999	Purple	Green	OK	2.54317	7.2478	1.51091	2.39274	0.00085	0.0101314	yes
BnaA06g35180D	chrA06:23208310-23210307	Purple	Green	OK	5.60915	17.6498	1.65379	2.60302	0.00045	0.00606143	yes
BnaA06g35200D	chrA06:23218841-23222530	Purple	Green	OK	10.6819	2.81485	-1.92404	-3.15735	5e-05	0.000959923	yes
BnaA06g35330D	chrA06:23269958-23271245	Purple	Green	OK	0	21.7033	inf	#NAME?	5e-05	0.000959923	yes
BnaA06g35500D	chrA06:23320789-23321440	Purple	Green	OK	9.37707	0	#NAME?	#NAME?	5e-05	0.000959923	yes
BnaA06g35660D	chrA06:23410726-23418092	Purple	Green	OK	5.55035	2.30448	-1.26814	-2.07038	0.00545	0.0418	yes
BnaA06g35830D	chrA06:23488313-23489463	Purple	Green	OK	95.0981	15.6238	-2.60567	-3.962	5e-05	0.000959923	yes
BnaA06g35850D	chrA06:23493745-23495466	Purple	Green	OK	86.4476	231.299	1.41986	2.20197	0.0014	0.0150511	yes
BnaA06g35970D	chrA06:23617352-23618249	Purple	Green	OK	121.292	336.592	1.47251	2.5575	0.00045	0.00606143	yes
BnaA06g35980D	chrA06:23618785-23621579	Purple	Green	OK	14.1661	47.1453	1.73468	2.89947	5e-05	0.000959923	yes
BnaA06g36070D	chrA06:23658638-23662239	Purple	Green	OK	13.6064	33.0876	1.282	1.94757	0.00425	0.0352588	yes
BnaA06g36220D	chrA06:23749073-23750249	Purple	Green	OK	6.96748	0.986407	-2.82038	-2.64582	0.0066	0.047785	yes
BnaA06g36250D	chrA06:23765224-23767233	Purple	Green	OK	6.05474	23.5041	1.95677	3.10013	5e-05	0.000959923	yes
BnaA06g36360D	chrA06:23831987-23833353	Purple	Green	OK	3.81786	11.3405	1.57065	2.27394	0.00265	0.0246127	yes
BnaA06g36380D	chrA06:23839306-23841049	Purple	Green	OK	33.779	7.87148	-2.10142	-3.24732	5e-05	0.000959923	yes
BnaA06g36500D	chrA06:23906301-23909427	Purple	Green	OK	3.06625	12.3757	2.01296	2.84423	0.0007	0.00871608	yes
BnaA06g36780D	chrA06:24045247-24048492	Purple	Green	OK	12.7518	3.56635	-1.83818	-2.78779	0.0001	0.00178191	yes
BnaA06g36790D	chrA06:24049239-24054536	Purple	Green	OK	9.21018	3.97643	-1.21176	-2.02852	0.0051	0.0397662	yes
BnaA06g36850D	chrA06:24071562-24072062	Purple	Green	OK	0	19.2269	inf	#NAME?	5e-05	0.000959923	yes
BnaA06g36910D	chrA06:24095649-24097221	Purple	Green	OK	4.3064	16.7871	1.96279	2.67308	0.00095	0.0110606	yes
BnaA06g36920D	chrA06:24100894-24102972	Purple	Green	OK	120.271	38.8041	-1.632	-2.69583	0.00015	0.00250346	yes
BnaA06g37010D	chrA06:24145110-24146139	Purple	Green	OK	16.5448	41.5224	1.32751	2.12536	0.00425	0.0352588	yes
BnaA06g37040D	chrA06:24172563-24173040	Purple	Green	OK	140.315	48.9259	-1.52	-2.51589	0.0007	0.00871608	yes
BnaA06g37300D	chrA06:24342162-24342477	Purple	Green	OK	9.74745	0	#NAME?	#NAME?	5e-05	0.000959923	yes
BnaA06g37630D	chrA06_random:93533-93998	Purple	Green	OK	49.3361	8.93537	-2.46504	-3.19091	0.0002	0.00316579	yes
BnaA06g37670D	chrA06_random:106914-107516	Purple	Green	OK	19.8025	0	#NAME?	#NAME?	5e-05	0.000959923	yes
BnaA06g37720D	chrA06_random:116527-139079	Purple	Green	OK	1.45711	3.94141	1.4356	2.38514	0.00135	0.0146315	yes
BnaA06g37970D	chrA06_random:241619-245596	Purple	Green	OK	3.65695	88.6475	4.59937	6.78272	5e-05	0.000959923	yes
BnaA06g38100D	chrA06_random:317430-319533	Purple	Green	OK	68.5025	13.9893	-2.29183	-3.76453	5e-05	0.000959923	yes
BnaA06g38150D	chrA06_random:359392-362744	Purple	Green	OK	6.25958	1.05149	-2.57363	-3.02456	0.0012	0.0133692	yes
BnaA06g38450D	chrA06_random:548815-549112	Purple	Green	OK	6.23009	0	#NAME?	#NAME?	0.0016	0.016684	yes
BnaA06g38510D	chrA06_random:574239-577353	Purple	Green	OK	2.21766	7.49555	1.757	2.74682	0.0011	0.0124635	yes
BnaA06g38590D	chrA06_random:648403-648898	Purple	Green	OK	15.3348	0	#NAME?	#NAME?	0.0002	0.00316579	yes
BnaA06g38620D	chrA06_random:661605-665448	Purple	Green	OK	2.21322	0	#NAME?	#NAME?	5e-05	0.000959923	yes
BnaA06g38700D	chrA06_random:708783-710767	Purple	Green	OK	13.1346	1.80286	-2.86501	-3.29824	0.0014	0.0150511	yes
BnaA06g38980D	chrA06_random:1119979-1121624	Purple	Green	OK	102.587	15.8055	-2.69834	-4.42031	5e-05	0.000959923	yes
BnaA06g39210D	chrA06_random:1418504-1419902	Purple	Green	OK	7.54474	1.77021	-2.09155	-2.29817	0.00645	0.0470906	yes
BnaA06g39290D	chrA06_random:1474316-1475301	Purple	Green	OK	513.406	126.354	-2.02263	-2.89249	0.00015	0.00250346	yes
BnaA06g39560D	chrA06_random:1619119-1620439	Purple	Green	OK	65.3024	172.063	1.39773	2.18507	0.003	0.0270165	yes
BnaA06g39660D	chrA06_random:1660664-1661690	Purple	Green	OK	114.686	21.1936	-2.43598	-4.01319	5e-05	0.000959923	yes
BnaA06g40150D	chrA06_random:1899469-1901175	Purple	Green	OK	4.7884	21.5876	2.17259	3.14029	0.0004	0.0055115	yes
BnaA06g40300D	chrA06_random:1977812-1978907	Purple	Green	OK	3.54042	11.4638	1.69509	2.36101	0.0032	0.028339	yes
BnaA06g40330D	chrA06_random:1988685-1990422	Purple	Green	OK	30.7381	13.3601	-1.2021	-2.10593	0.0044	0.03611	yes
BnaA06g40370D	chrA06_random:2009459-2010437	Purple	Green	OK	4.25556	26.9057	2.66049	3.71921	5e-05	0.000959923	yes
BnaA06g40780D	chrA06_random:2179562-2181162	Purple	Green	OK	0	3.38614	inf	#NAME?	5e-05	0.000959923	yes
BnaA06g40920D	chrA06_random:2243353-2244506	Purple	Green	OK	0	5.8461	inf	#NAME?	5e-05	0.000959923	yes
BnaA07g00260D	chrA07:244956-246714	Purple	Green	OK	1.60952	6.38802	1.98874	2.5966	0.0018	0.0182563	yes
BnaA07g00530D	chrA07:412744-413839	Purple	Green	OK	12.9366	33.4402	1.37013	2.19681	0.00375	0.0320327	yes
BnaA07g00770D	chrA07:561540-565534	Purple	Green	OK	0.552199	2.68551	2.28194	2.67513	0.0034	0.0295699	yes
BnaA07g01220D	chrA07:865134-866236	Purple	Green	OK	13.0199	0	#NAME?	#NAME?	5e-05	0.000959923	yes
BnaA07g01250D	chrA07:880305-882631	Purple	Green	OK	3.84945	14.1976	1.88293	2.90292	0.00015	0.00250346	yes
BnaA07g01440D	chrA07:1119686-1120353	Purple	Green	OK	5.76497	0	#NAME?	#NAME?	0.0047	0.0378012	yes
BnaA07g01460D	chrA07:1124384-1126469	Purple	Green	OK	5.21281	1.52499	-1.77326	-2.29797	0.0048	0.0382235	yes
BnaA07g01640D	chrA07:1282010-1282333	Purple	Green	OK	0	22.8209	inf	#NAME?	0.00015	0.00250346	yes
BnaA07g01710D	chrA07:1319070-1321620	Purple	Green	OK	0	3.32102	inf	#NAME?	5e-05	0.000959923	yes
BnaA07g01750D	chrA07:1449105-1450185	Purple	Green	OK	14.9481	3.98627	-1.90685	-2.59854	0.00055	0.00713795	yes
BnaA07g01850D	chrA07:1538535-1539025	Purple	Green	OK	66.6142	11.0283	-2.59461	-3.21351	0.00075	0.00921228	yes
BnaA07g02510D	chrA07:2120516-2123606	Purple	Green	OK	0.762491	4.59723	2.59197	2.77364	0.00255	0.0239183	yes
BnaA07g02610D	chrA07:2285501-2286336	Purple	Green	OK	10.0891	0	#NAME?	#NAME?	5e-05	0.000959923	yes
BnaA07g02630D	chrA07:2307438-2311677	Purple	Green	OK	8.89687	2.79405	-1.67094	-2.12845	0.00685	0.0491199	yes
BnaA07g02870D	chrA07:2504643-2505027	Purple	Green	OK	9.76329	0	#NAME?	#NAME?	5e-05	0.000959923	yes
BnaA07g02890D	chrA07:2508180-2509784	Purple	Green	OK	21.2211	8.04907	-1.39861	-2.19652	0.00325	0.0286154	yes
BnaA07g02950D	chrA07:2547387-2550686	Purple	Green	OK	0	3.04293	inf	#NAME?	0.0019	0.0190531	yes
BnaA07g03060D	chrA07:2682684-2685035	Purple	Green	OK	4.47612	18.0006	2.00772	3.11032	0.00035	0.00494884	yes
BnaA07g03360D	chrA07:3011315-3018164	Purple	Green	OK	4.29171	40.1194	3.22468	4.65097	5e-05	0.000959923	yes
BnaA07g03390D	chrA07:3039686-3041912	Purple	Green	OK	0.988716	3.39066	1.77794	2.18043	0.00475	0.0379955	yes
BnaA07g03580D	chrA07:3235719-3238088	Purple	Green	OK	1.919	5.59806	1.54457	2.14045	0.00465	0.037626	yes
BnaA07g03590D	chrA07:3248122-3249646	Purple	Green	OK	11.372	28.2832	1.31445	2.2181	0.0029	0.0263271	yes
BnaA07g03600D	chrA07:3253657-3255132	Purple	Green	OK	7.88838	33.7622	2.09761	3.59946	5e-05	0.000959923	yes
BnaA07g03680D	chrA07:3325234-3327593	Purple	Green	OK	1.47032	5.81803	1.9844	2.42967	0.00325	0.0286154	yes
BnaA07g03760D	chrA07:3393849-3394728	Purple	Green	OK	0	11.5361	inf	#NAME?	5e-05	0.000959923	yes
BnaA07g04210D	chrA07:4395582-4397001	Purple	Green	OK	2.1698	7.61609	1.81149	2.36452	0.002	0.0198091	yes
BnaA07g04380D	chrA07:4657807-4659471	Purple	Green	OK	6.48723	1.3098	-2.30826	-2.68823	0.00255	0.0239183	yes
BnaA07g05140D	chrA07:5516309-5519241	Purple	Green	OK	6.89893	35.6239	2.3684	3.88914	5e-05	0.000959923	yes
BnaA07g05170D	chrA07:5528934-5529735	Purple	Green	OK	18.3453	59.835	1.70558	2.76893	0.0001	0.00178191	yes
BnaA07g05700D	chrA07:6011639-6017450	Purple	Green	OK	1.62501	5.49347	1.75727	2.52791	0.0008	0.0096705	yes
BnaA07g05790D	chrA07:6121653-6124373	Purple	Green	OK	6.03892	16.3543	1.43731	2.36088	0.0021	0.0205893	yes
BnaA07g06170D	chrA07:6476015-6478934	Purple	Green	OK	3.63419	9.78632	1.42913	2.37236	0.00165	0.0170553	yes
BnaA07g06190D	chrA07:6485940-6487302	Purple	Green	OK	9.29973	25.1353	1.43446	2.38212	0.0016	0.016684	yes
BnaA07g06370D	chrA07:6726680-6728429	Purple	Green	OK	4.02872	13.8624	1.78279	2.22789	0.00495	0.0388809	yes
BnaA07g06500D	chrA07:6806277-6810599	Purple	Green	OK	0.318484	16.2536	5.6734	5.04503	0.0032	0.028339	yes
BnaA07g06570D	chrA07:6898499-6899709	Purple	Green	OK	74.4398	281.054	1.9167	3.15428	5e-05	0.000959923	yes
BnaA07g06680D	chrA07:6949057-6949808	Purple	Green	OK	0	6.61594	inf	#NAME?	0.0009	0.0105621	yes
BnaA07g06900D	chrA07:7146558-7147315	Purple	Green	OK	322.575	2.93055	-6.78232	-7.29837	5e-05	0.000959923	yes
BnaA07g06940D	chrA07:7222457-7223727	Purple	Green	OK	2.15161	58.1397	4.75603	4.67933	0.00165	0.0170553	yes
BnaA07g07790D	chrA07:8068822-8070542	Purple	Green	OK	193.321	54.9272	-1.81541	-2.93826	0.0002	0.00316579	yes
BnaA07g07980D	chrA07:8177866-8180572	Purple	Green	OK	14.8672	77.9353	2.39015	4.06722	5e-05	0.000959923	yes
BnaA07g08320D	chrA07:8475686-8476866	Purple	Green	OK	22.7145	7.10501	-1.67671	-2.52721	0.0013	0.0142051	yes
BnaA07g08530D	chrA07:8637999-8639391	Purple	Green	OK	7.38123	31.1289	2.07632	3.13085	0.0002	0.00316579	yes
BnaA07g08710D	chrA07:8743239-8744378	Purple	Green	OK	0	3.64285	inf	#NAME?	5e-05	0.000959923	yes
BnaA07g08840D	chrA07:8901908-8903410	Purple	Green	OK	3.23217	34.8239	3.4295	4.83144	5e-05	0.000959923	yes
BnaA07g08850D	chrA07:8908634-8909159	Purple	Green	OK	0	20.9835	inf	#NAME?	0.00025	0.00378451	yes
BnaA07g09050D	chrA07:8984769-8988069	Purple	Green	OK	67.1401	12.7188	-2.40021	-3.9476	5e-05	0.000959923	yes
BnaA07g09420D	chrA07:9240153-9245876	Purple	Green	OK	41.5947	7.196	-2.53113	-4.07632	5e-05	0.000959923	yes
BnaA07g10080D	chrA07:9608117-9608792	Purple	Green	OK	9.25407	26.1808	1.50035	2.12471	0.00475	0.0379955	yes
BnaA07g10140D	chrA07:9669968-9675523	Purple	Green	OK	81.761	24.7358	-1.72481	-2.85651	0.0001	0.00178191	yes
BnaA07g10510D	chrA07:9976487-9980067	Purple	Green	OK	7.28013	2.33516	-1.64044	-2.07689	0.0059	0.0442101	yes
BnaA07g10570D	chrA07:10008062-10009409	Purple	Green	OK	31.8698	12.9235	-1.30219	-2.14714	0.0037	0.0316626	yes
BnaA07g10910D	chrA07:10236111-10238688	Purple	Green	OK	2.3719	18.9496	2.99805	4.30726	5e-05	0.000959923	yes
BnaA07g11150D	chrA07:10476550-10483288	Purple	Green	OK	1.67045	5.9423	1.83078	2.86918	0.0004	0.0055115	yes
BnaA07g11160D	chrA07:10483674-10484652	Purple	Green	OK	5.40527	13.8343	1.35581	2.04199	0.006	0.0447159	yes
BnaA07g11170D	chrA07:10490501-10491428	Purple	Green	OK	69.8916	332.733	2.25117	3.83858	5e-05	0.000959923	yes
BnaA07g11270D	chrA07:10549015-10552343	Purple	Green	OK	6.92037	1.93996	-1.83482	-2.65321	0.0009	0.0105621	yes
BnaA07g11360D	chrA07:10601452-10604008	Purple	Green	OK	9.55302	35.9285	1.9111	3.1888	5e-05	0.000959923	yes
[truncated: 4,230 more rows]

## Sheet: B. rapa(P1&G)
Gene_id	Locus	Sample_1	Sample_2	Status	Value_1	Value_2	Log2(fold_change)	Test_stat	P_value	Q_value	Significant
[truncated: 1,057 more rows]

[truncated: 3 more sheets: B. rapa(P2&G), B. carinata(P&G), B. juncea(P&G)]
