# Supplementary material for: Comparative Leaves Transcriptome Analysis Emphasizing on Accumulation of Anthocyanins in Brassica: Molecular Regulation and Potential Interaction with Photosynthesis
Source: Front Plant Sci. 2016 Mar 18;7:311. doi: 10.3389/fpls.2016.00311 (PMC4796009; doi:10.3389/fpls.2016.00311)
Supplement: Supplementary Data Sheet S5 — Total expression value of 21 co-DEGs between purple and green leaves in different Brassica species. [file DataSheet5.XLSX]

## Sheet: Sheet1
Datasheet S4: Total expression value of 21 co-DEGs between purple and green leaves in different Brassica species
	FPKM
	B. napus		B. juncea		B. carinata		B. rapa			B.oleracea
Gene name	BnaP	BnaG	BjuP	BjuG	BcaP	BcaG	BraP1	BraP2	BraG	BolP	BolG
FTSH8	73.1349	177.586	46.8742	70.6721	165.033	336.128	75.6708	71.8351	180.775	40.2309	61.5776
SH3-like	512.639	1192.17	119.802	63.5301	609.993	139.281	343.775	155.262	138.428	1064.39	1244.76
LHCB1.3	6349.94	10854.5	13122.7	7417.34	18247.6	857.268	9204.54	7359.84	4840.96	1662.88	11845.4
CPN60A	525.376	862.764	1188.9	1272.73	515.071	181.431	1214.91	1308.11	1083.29	192.075	450.677
PXG3	360.113	369.949	508.682	211.376	371.594	1005.23	275.425	170.204	249.788	395.492	213.093
LHCB1.4	4344.4	9271.94	5042.26	7196.09	6476.4	549.715	1995.67	1075.31	2500.37	1442.61	7305.6
Unknown protein	1072.51	711.504	2286.68	1129.39	1298.52	359.98	537.283	675.839	838.363	1219.62	882.04
GOX1	1310.57	1199.86	782.948	1471.74	1312.92	1078.12	949.657	1286.4	1408.06	218.721	1041.72
LHCB2.3	1176.23	5185.6	2768.61	4017.92	2333.23	597.953	5845.57	2086.46	2773.54	256.882	2757.07
Unkonw protein	1154.55	1064.49	1282.89	916.191	383.585	25.6486	924.315	1896.93	925.685	134.07	390.364
ATPP2-A1	103.809	26.6613	38.6656	14.5077	15.1661	113.135	15.8794	43.9238	210.767	43.7644	17.8979
ANS	48.5892	15.6555	542.596	26.4803	955.799	61.1084	311.121	108.911	10.0704	680.241	17.821
GRP8	939.318	1066.56	2633.29	106.114	1156.19	96.4686	1917.18	955.12	1753.06	1755.57	2327.41
MT2B	1187.4	686.746	964.249	1110.12	1866.09	187.188	767.261	739.566	1146.07	945.351	570.301
unknown protein	140.157	374.787	523.765	275.664	389.327	84.878	219.746	178.875	45.3334	470.356	195.257
GLN1	422.024	300.981	50.3099	89.8618	100.215	492.597	40.6969	80.8578	219.511	48.69	202.258
TT19	95.4223	37.9528	1052.01	93.0977	844.833	18.9592	486.282	151.903	35.6145	600.875	12.2294
PGL5	943.475	180.059	935.275	200.791	648.275	87.0904	2688.63	202.964	124.381	1997.91	107.157
COR27	118.854	172.254	88.8224	130.111	131.711	200.884	255.239	261.549	447.825	143.149	220.943
HTB4	915.11	1075.05	1809.09	721.693	1311.56	72.5147	586.269	798.414	285.112	1284.76	1087.9
DFR	61.316	21.2033	1070.92	27.1711	831.199	25.7034	274.177	166.095	3.72396	616.222	12.4842
