# Supplementary material for: Comparative Leaves Transcriptome Analysis Emphasizing on Accumulation of Anthocyanins in Brassica: Molecular Regulation and Potential Interaction with Photosynthesis
Source: PubMed Central journal article supplement (PMC4796009; doi:10.3389/fpls.2016.00311), 2016-03-18
Supplement: Table1.pdf [file Table1.pdf]

**Table S1. All materials used in this study**

| Species                     | Leaf color | Genotype/accession number | Subspecies/Crop Type                              | Symbol |
|-----------------------------|------------|---------------------------|---------------------------------------------------|--------|
| 1. <i>Brassica rapa</i>     | Purple     | Zibaicai                  | <i>Brassica campestris</i>                        | BraP1  |
|                             |            | Hongshancaitai            | <i>Brassica campestris</i> var. <i>purpuraria</i> | BraP2  |
|                             | Green      | Kenshi                    | <i>Brassica chinensis</i>                         | BraG   |
| 2. <i>Brassica oleracea</i> | Purple     | Xinhongmu                 | <i>Brassica oleracea</i> var. <i>capitata</i>     | BolP   |
|                             | Green      | 02-12                     | <i>Brassica oleracea</i> var. <i>capitata</i>     | BolG   |
| 3. <i>Brassica napus</i>    | Purple     | GZ-1                      | Semi-winter type oilseed                          | BnaP   |
|                             | Green      | Zhongshuang11             | Semi-winter type oilseed                          | BnaG   |
| 4. <i>Brassica juncea</i>   | Purple     | Ziyejiecai                | <i>Brassica juncea</i> var. <i>gracilis</i>       | BjuP   |
|                             | Green      | G19                       |                                                   | BjuG   |
| 5. <i>Brassica carinata</i> | Purple     | CGN1159                   |                                                   | BcaP   |
|                             | Green      | CGN1148                   |                                                   | BcaG   |

**Table S2. Primers used for RT-PCR analysis in this study**

| Gene        | 5' to 3' Forward Primer | 5' to 3' Reverse Primer |
|-------------|-------------------------|-------------------------|
| C4H         | GTCGCTGCGATTGAGACAAC    | TCAGGCTCTGTGACTTGAC     |
| CHS         | GCGATCCTTGACGAGGTTGA    | CGTCGTAGCCACACCATCTT    |
| CHI         | TGACGATGAAGCTGCCGTTA    | AGCGAAGAGGATGGATGCAC    |
| FLS2        | AGGCGATCCGATCTGGAGAA    | CCATCTCCTGTGTGCTTCGT    |
| PAL2        | CGACGGAAGCTCGTACATGA    | CCACTGAGGAGAGGTACGGA    |
| PAL1        | CAACGTTCCCTCGTCGCAATC   | AAGCTCACCGTTGACTCCAG    |
| TT8         | AATCATCGATGGAAGCGAGG    | TCATTTGCACCACTTAGCCA    |
| PAP1(MYB75) | CAAACCTCGACCTCGATCCT    | CACCACCTATTCTGACCATCC   |
| MYBL2       | TCGATCCAACCAATCATCGT    | CCGGCACTAGCATTATCCTC    |

**Table S3. Analysis of stomatal conductance (gs), transpiration rates (Tr) as well as rates of photosynthesis (A) in green and purple leaves of different *Brassica* species.**

| Parameters               | Net photosynthetic rate (A)              |                 | Transpiration rate (Tr)                |                    | Stomal conductance (gs)                |                  |
|--------------------------|------------------------------------------|-----------------|----------------------------------------|--------------------|----------------------------------------|------------------|
| Units                    | ( $\mu\text{mol m}^{-2} \text{s}^{-1}$ ) |                 | ( $\text{mmol m}^{-2} \text{s}^{-1}$ ) |                    | ( $\text{mmol m}^{-2} \text{s}^{-1}$ ) |                  |
| Species                  | Green                                    | Purple          | Green                                  | Purple             | Green                                  | Purple           |
| <i>Brassica napus</i>    | 2.37 $\pm$ 0.01                          | 1.50 $\pm$ 0.06 | 63.57 $\pm$ 5.77                       | 97.34 $\pm$ 0.72   | 6.67 $\pm$ 0.01                        | 10.59 $\pm$ 0.00 |
| <i>Brassica juncea</i>   | 2.60 $\pm$ 0.08                          | 1.35 $\pm$ 0.04 | 46.91 $\pm$ 5.01                       | 35.67 $\pm$ 5.64   | 4.96 $\pm$ 0.01                        | 3.76 $\pm$ 0.01  |
| <i>Brassica carinata</i> | 1.37 $\pm$ 0.07                          | 2.18 $\pm$ 0.10 | 39.26 $\pm$ 2.26                       | 95.04 $\pm$ 7.62   | 3.97 $\pm$ 0.00                        | 9.91 $\pm$ 0.01  |
| <i>Brassica rapa P1</i>  | 1.70 $\pm$ 0.06                          | 1.26 $\pm$ 0.05 | 319.96 $\pm$ 8.42                      | 163.42 $\pm$ 14.27 | 33.42 $\pm$ 0.01                       | 17.14 $\pm$ 0.01 |
| <i>Brassica rapa P2</i>  | 1.70 $\pm$ 0.06                          | 2.95 $\pm$ 0.07 | 319.96 $\pm$ 8.42                      | 456.28 $\pm$ 5.98  | 33.42 $\pm$ 0.01                       | 48.36 $\pm$ 0.01 |
| <i>Brassica oleracea</i> | 2.14 $\pm$ 0.03                          | 2.05 $\pm$ 0.05 | 169.93 $\pm$ 5.22                      | 108.31 $\pm$ 3.61  | 18.20 $\pm$ 0.01                       | 11.10 $\pm$ 0.00 |

Each value represents mean of three replicates  $\pm$  SE.

**Table S4. Number of raw and clean reads, their mapping and repeatability analysis**

| Species                  | Duplicates | Raw data (Reads) | Clean data (Reads) | Total mapping (%)     | Unique mapping (%)   | Correlation |
|--------------------------|------------|------------------|--------------------|-----------------------|----------------------|-------------|
| <i>Brassica rapa</i>     | BraP1      | 22,171,200       | 20,541,872         | 13,970,509<br>(68.0%) | 1,743,791<br>(87.5%) | 0.953       |
|                          |            | 18,931,588       | 17,257,064         | 11,731,300<br>(68.0%) | 1,518,199<br>(87.1%) |             |
|                          | BraP2      | 20,820,232       | 18,418,448         | 12,380,693<br>(67.2%) | 1,617,280<br>(86.9%) | 0.968       |
|                          |            | 20,370,406       | 18,869,378         | 14,270,175<br>(75.6%) | 6,524,279<br>(54.3%) |             |
|                          | BraG       | 20,289,124       | 18,677,082         | 12,784,027<br>(68.4%) | 1,865,614<br>(85.4%) | 0.904       |
|                          |            | 23,051,574       | 21,252,826         | 14,584,961<br>(68.6%) | 2,001,536<br>(86.3%) |             |
| <i>Brassica oleracea</i> | BolP       | 26,056,356       | 23,143,932         | 17,975,319<br>(77.7%) | 1,721,556<br>(90.4%) | 0.948       |
|                          |            | 22,334,628       | 19,813,850         | 15,383,179<br>(77.6%) | 1,438,140<br>(90.7%) |             |
|                          | BolG       | 21,463,016       | 19,128,136         | 15,135,419<br>(79.1%) | 1,385,988<br>(90.8%) | 0.982       |
|                          |            | 22,538,906       | 20,236,346         | 15,980,813<br>(79.0%) | 1,422,355<br>(91.1%) |             |
| <i>Brassica napus</i>    | BnaP       | 21,962,496       | 20,219,780         | 15,987,677<br>(79.1%) | 1,963,988<br>(87.7%) | 0.949       |
|                          |            | 21,371,738       | 19,528,750         | 16,097,511<br>(82.4%) | 2,345,557<br>(85.4%) |             |
|                          | BnaG       | 20,990,744       | 19,231,610         | 16,080,161<br>(83.6%) | 1,429,387<br>(91.1%) | 0.968       |
|                          |            | 18,996,786       | 16,946,838         | 14,378,037<br>(84.8%) | 3,410,995<br>(76.3%) |             |
| <i>Brassica juncea</i>   | BjuP       | 19,870,912       | 17,946,950         | 6,753,251<br>(37.6%)  | 945,825<br>(86.0%)   | 0.971       |
|                          |            | 19,870,954       | 18,000,086         | 6,752,109<br>(37.5%)  | 921,925<br>(86.3%)   |             |
|                          | BjuG       | 24,859,152       | 22,910,184         | 8,591,360<br>(37.5%)  | 1,261,017<br>(85.3%) | 0.978       |
|                          |            | 23,296,300       | 21,409,578         | 8,349,106<br>(39.0%)  | 1,208,934<br>(85.5%) |             |
| <i>Brassica carinata</i> | BcaP       | 22,087,954       | 20,445,210         | 8,725,425<br>(42.7%)  | 1,164,107<br>(86.7%) | 0.977       |
|                          |            | 23,494,160       | 21,688,268         | 9,085,315<br>(41.9%)  | 1,221,769<br>(86.6%) |             |
|                          | BcaG       | 31,100,796       | 29,155,214         | 11,281,457<br>(38.7%) | 1,307,780<br>(88.4%) | 0.887       |
|                          |            | 32,219,504       | 30,352,482         | 11,971,610<br>(39.4%) | 1,332,432<br>(88.9%) |             |

**Table S5. The numbers of DEGs between green and purple leaves of different species**

| Species                  | Gene numbers |      |       |
|--------------------------|--------------|------|-------|
|                          | Up           | Down | Total |
| <i>B. napus</i> (P/G)    | 3126         | 2859 | 5985  |
| <i>B. juncea</i> (P/G)   | 2314         | 4401 | 6715  |
| <i>B. carinata</i> (P/G) | 589          | 937  | 1526  |
| <i>B. rapa R1</i> (P/G)  | 487          | 570  | 1057  |
| <i>B. rapa R2</i> (P/G)  | 575          | 1243 | 1818  |
| <i>B. oleracea</i> (P/G) | 3614         | 2968 | 6582  |

**Table S6. Functional annotation of co-DEGs between purple and green leaves of all species**

|                                                        | Arabidopsis Gene ID | Functional Annotation                                                                                                                                                                                  |
|--------------------------------------------------------|---------------------|--------------------------------------------------------------------------------------------------------------------------------------------------------------------------------------------------------|
| Co-down regulation in all varieties with purple leaves | AT1G06430*          | FTSH8, encodes a FtsH protease that is localized to the chloroplast                                                                                                                                    |
|                                                        | AT3G14420*          | GOX1, Encodes a glycolate oxidase that modulates reactive oxygen species-mediated signal transduction during nonhost resistance.                                                                       |
|                                                        | AT5G16570           | GLN1;4, Encodes a cytosolic glutamine synthetase, the enzyme has high affinity with substrate ammonium                                                                                                 |
|                                                        | AT5G42900           | COR27, cold regulated gene 27 (COR27); BEST Arabidopsis thaliana protein match is: unknown protein (TAIR:AT4G33980.1);                                                                                 |
| Co-UP regulation in all varieties with purple leaves   | AT5G17220           | TT19, Encodes glutathione transferase belonging to the phi class of GSTs.                                                                                                                              |
|                                                        | AT5G42800           | DFR, dihydroflavonol reductase. Catalyzes the conversion of dihydroquercetin to leucocyanidin in the biosynthesis of anthocyanins                                                                      |
|                                                        | AT4G22880           | ANS, encodes leucoanthocyanidin dioxygenase, which is involved in proanthocyanin biosynthesis.                                                                                                         |
|                                                        | AT5G24420           | PGL5, Encodes a cytosolic 6-phosphogluconolactonase (PGL) thought to be involved in the oxidative pentose-phosphate pathway (OPPP).                                                                    |
| Others                                                 | AT1G09690           | Translation protein SH3-like family protein; FUNCTIONS IN: structural constituent of ribosome;                                                                                                         |
|                                                        | AT1G29930           | LHCB1.3 Subunit of light-harvesting complex II (LHCII), which absorbs light and transfers energy to the photosynthetic reaction center                                                                 |
|                                                        | AT2G28000           | CPN60A, Encodes chaperonin-60 alpha, a molecular chaperone involved in Rubisco folding.                                                                                                                |
|                                                        | AT2G33380           | PXG3, Encodes a calcium binding protein whose mRNA is induced upon treatment with NaCl, ABA and in response to dessication.                                                                            |
|                                                        | AT2G34430           | LHCB1.4, Photosystem II type I chlorophyll a/b-binding protein                                                                                                                                         |
|                                                        | AT3G08610           | Unknown protein, mitochondrial respiratory chain complex I                                                                                                                                             |
|                                                        | AT3G27690           | LHCB2.3, Encodes Lhcb2.4. Belongs to the Lhc super-gene family encodes the light-harvesting chlorophyll a/b-binding (LHC) proteins that constitute the antenna system of the photosynthetic apparatus. |
|                                                        | AT4G16980           | Arabinogalactan-protein family; INVOLVED IN: biological_process unknown; LOCATED IN: endomembrane system;                                                                                              |
|                                                        | AT4G19840           | ATPP2-A1, encodes a phloem lectin, similar to phloem lectin in                                                                                                                                         |

---

cucumber and celery.

AT4G39260 GRP8, Encodes a glycine-rich protein with RNA binding domain at the N-terminus.

AT5G02380 MT2B, cysteine-rich protein with copper-binding activity

AT5G16250 Unknown protein, Located in chloroplast

AT5G59910 HTB4, HTB4; FUNCTIONS IN: DNA binding; INVOLVED IN: nucleosome assembly; LOCATED IN: nucleolus

---
